# Supplementary material for: Whole Proteome Profiling of N-Myristoyltransferase Activity and Inhibition Using Sortase A
Source: PubMed Central journal article supplement (PMC6317481; doi:10.1074/mcp.ra118.001043), 2018-10-19
Supplement: 140172_1_supp_208105_pfjxts.pdf [file 140172_1_supp_208105_pfjxts.pdf]

SUPPLEMENTARY FIGURES

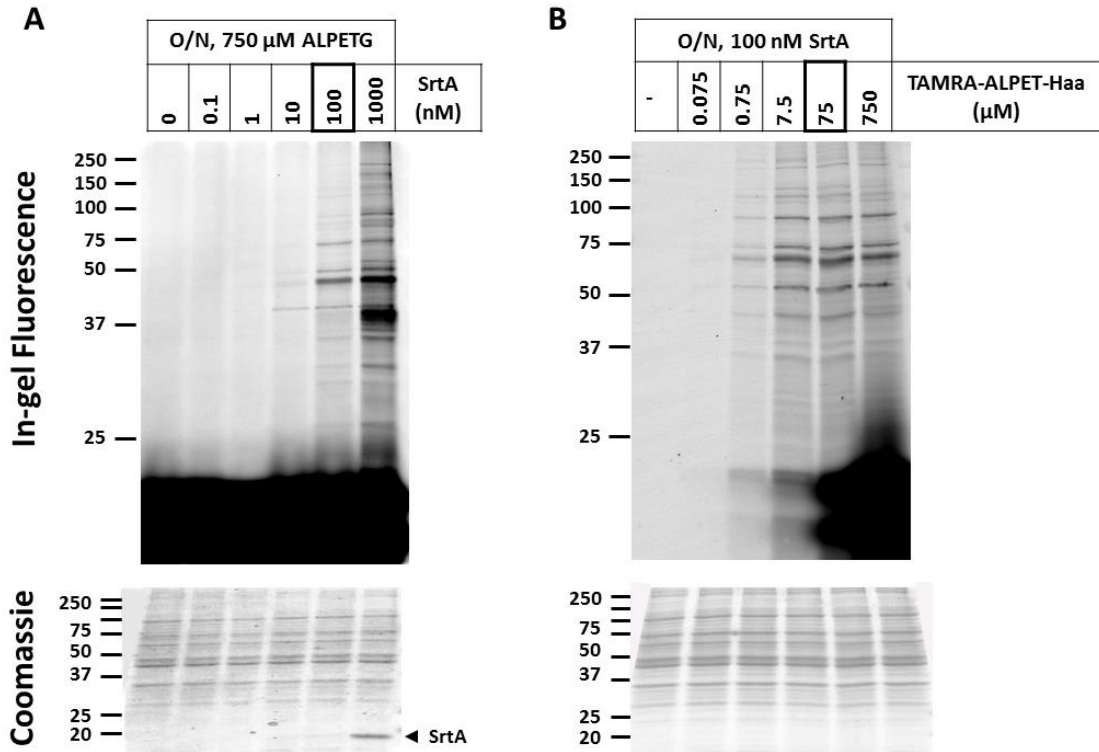

**Figure S1. Optimization of overnight SrtA labeling reaction in whole-cell lysates.** MDA-MB-231 cells were incubated with 100 nM IMP-1088 for 24 h before lysis. Lysates were labeled with SrtA and TAMRA-ALPET-Haa overnight at 4 °C and subjected to SDS-PAGE. In-gel fluorescence images were acquired with excitation/emission wavelengths of 532/568 nm. **(A)** Optimization of SrtA concentration with constant depsipeptide substrate. **(B)** Optimization of TAMRA-ALPET-Haa concentration with constant SrtA concentration. Highlighted are the concentrations selected for further experiments.

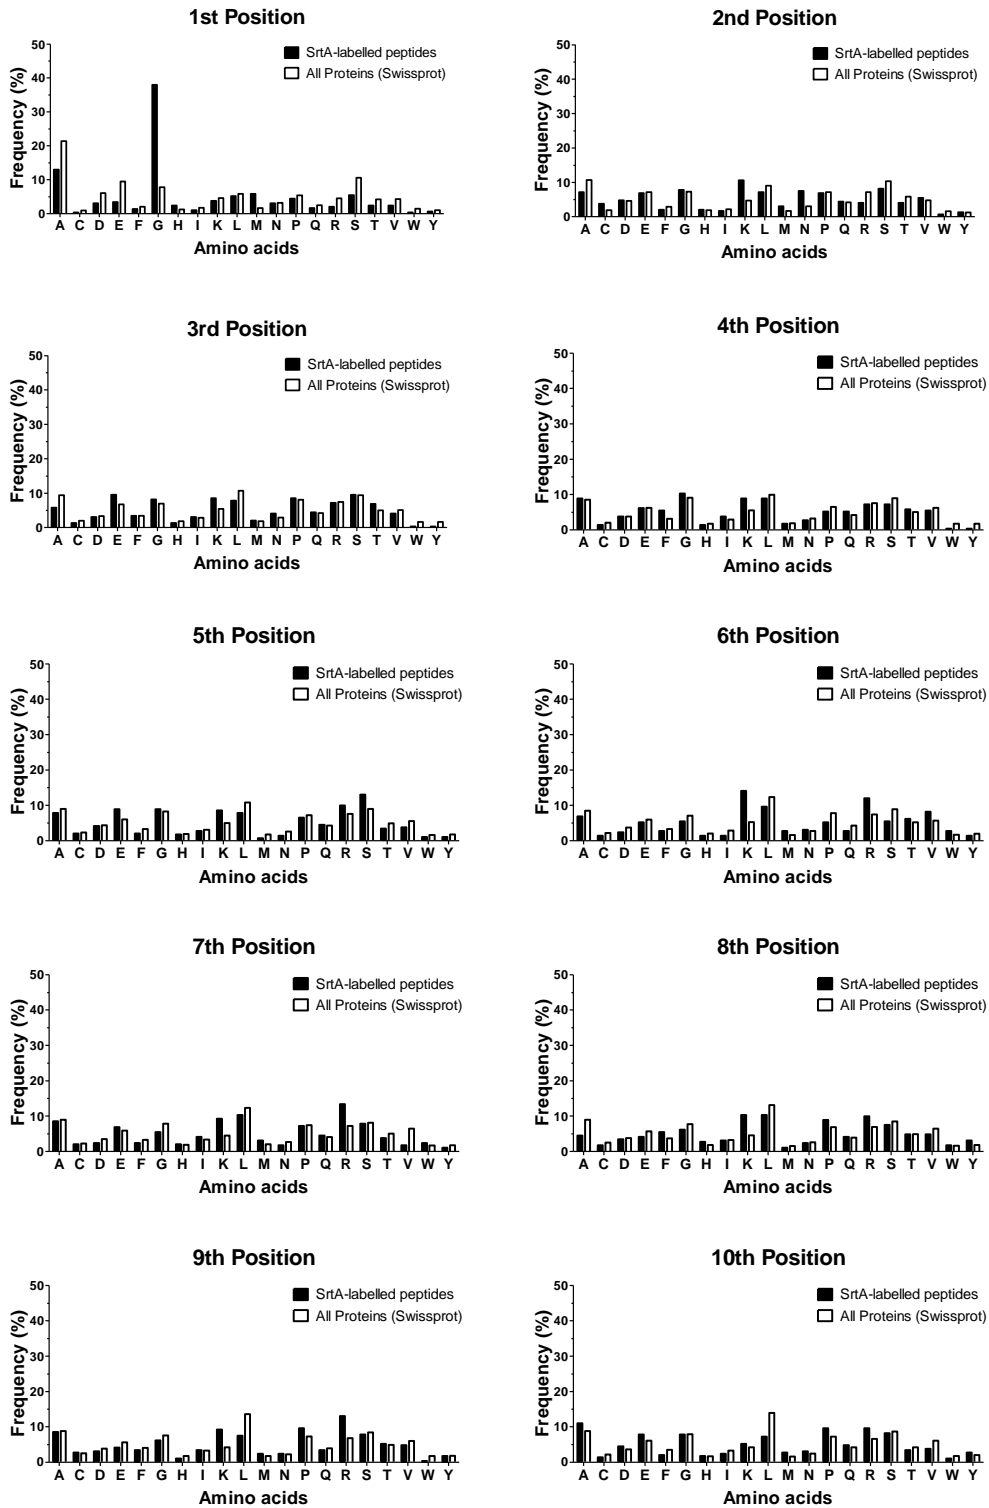

**Figure S2.** Bar plots comparing the frequencies for every amino acid per position in experimentally identified SrtA-labeled peptides and for all peptides of the human proteome (Swissprot, Uniprot, December 2017; 42,326 entries).

Raw File  
agg\_pep\_sort\_pos\_1

Scan  
19070

Method  
FTMS; HCD

Score  
66.43

m/z  
846.94

Gene names  
ACSS2

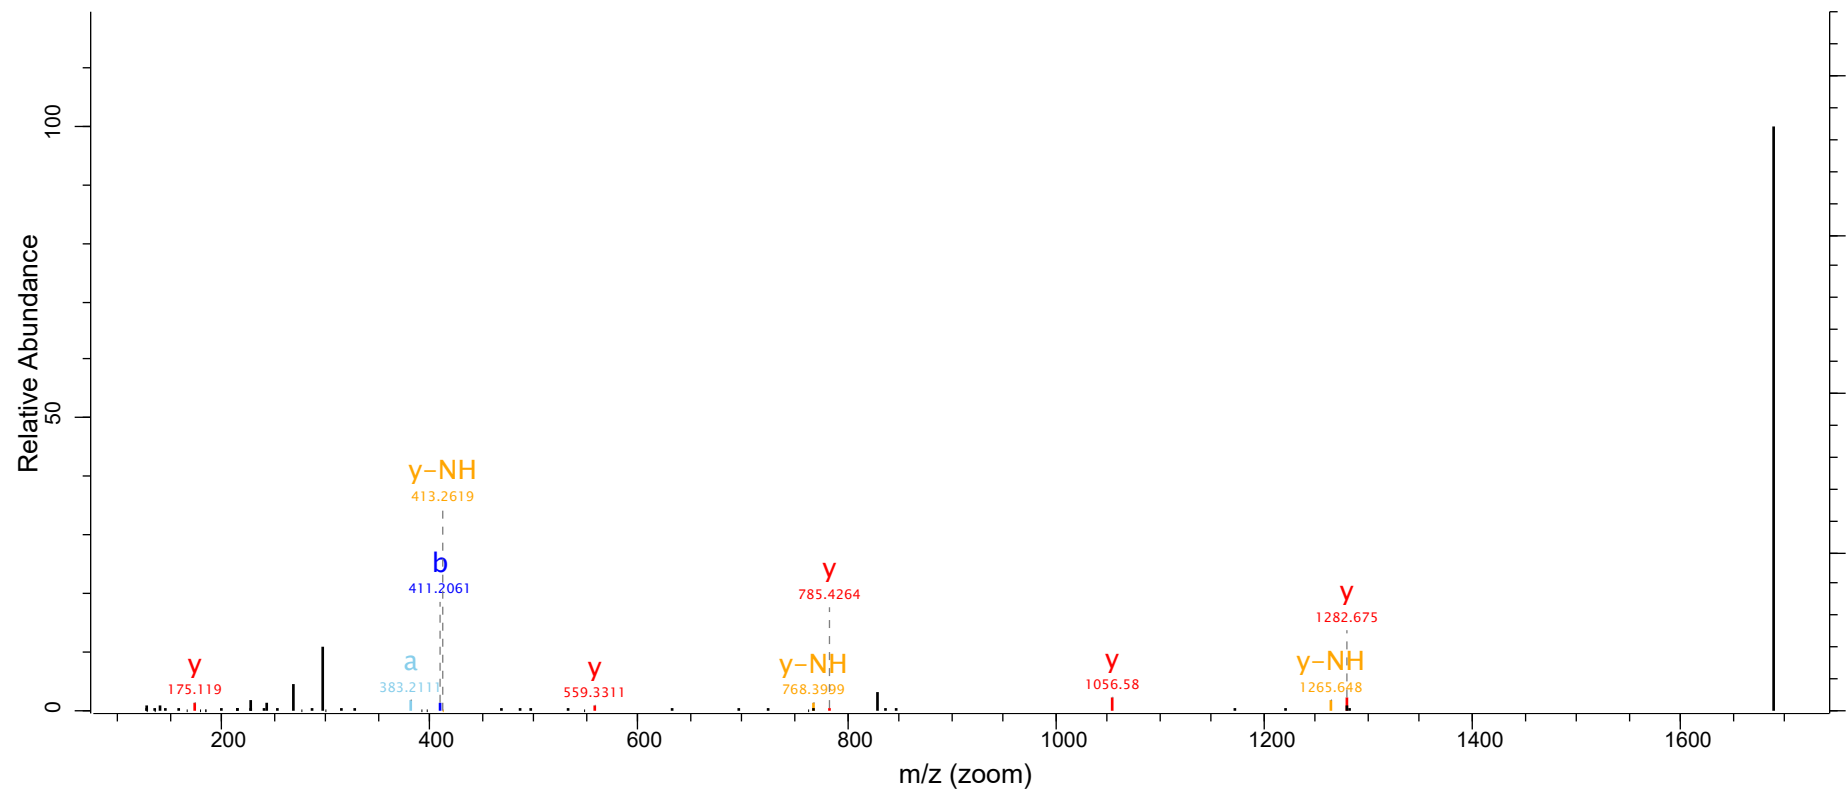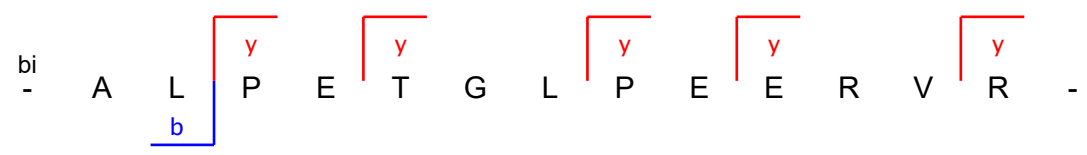

Raw File  
agg\_pep\_sort\_pos\_2

Scan  
21799

Method  
FTMS; HCD

Score  
105.4

m/z  
719.36

Gene names  
ACSS2

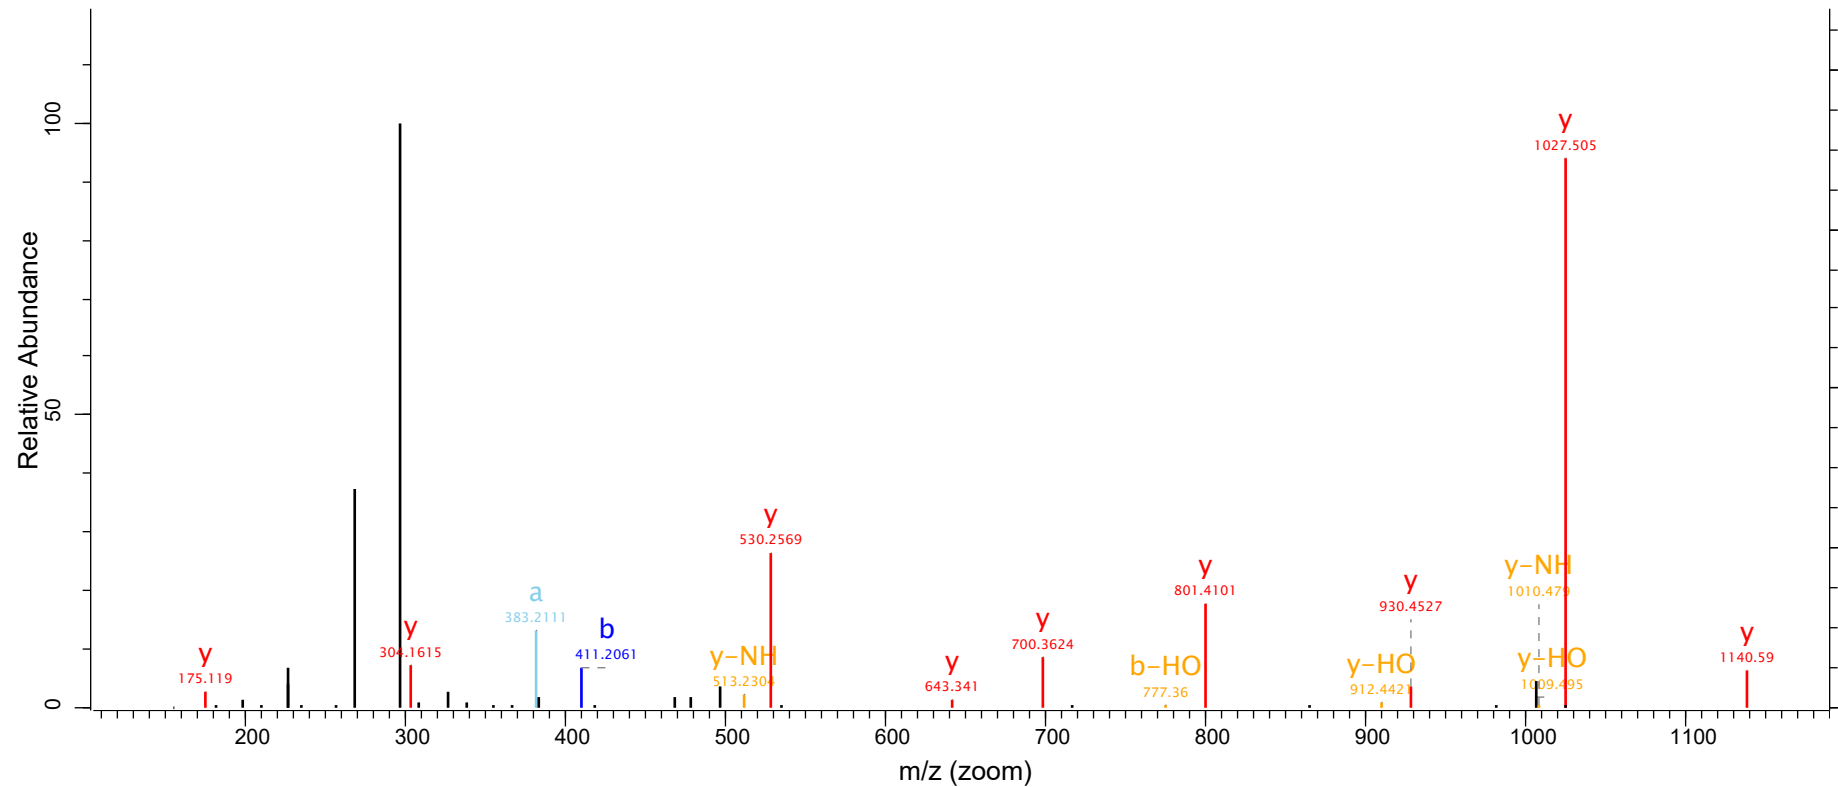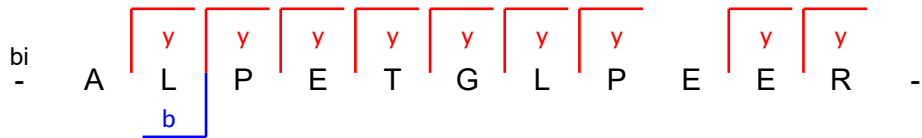

Raw File  
agg\_pep\_sort\_pos\_3

Scan  
11600

Method  
FTMS; HCD

Score  
102.51

m/z  
583.29

Gene names  
AGL

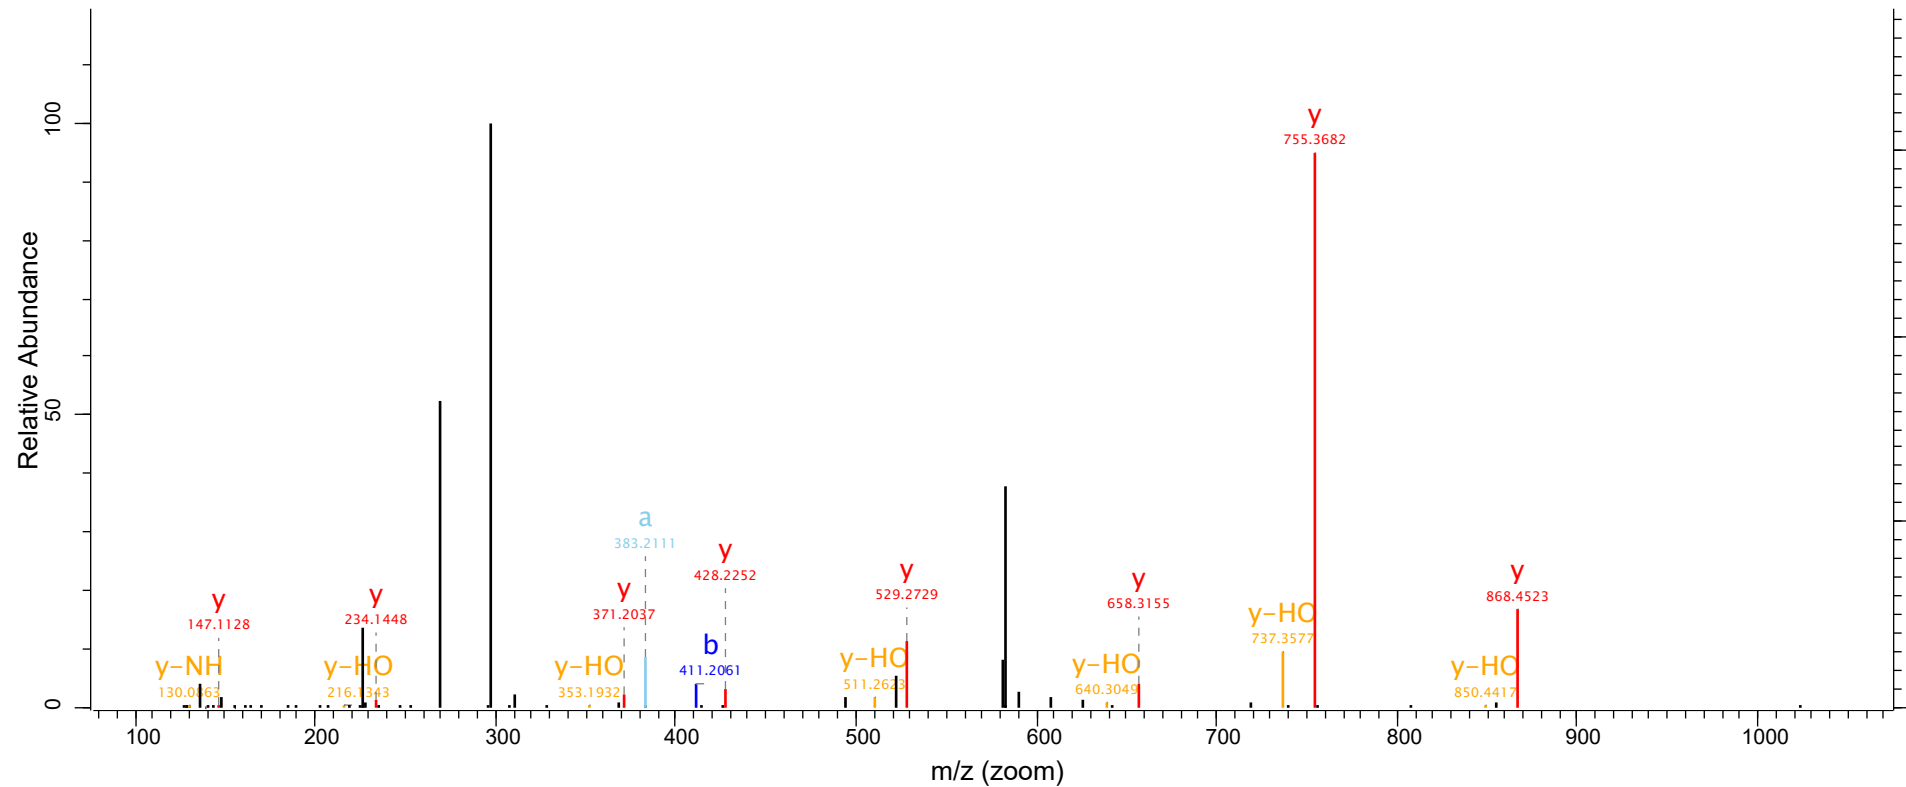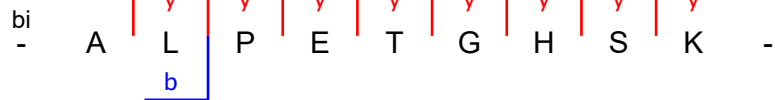

Raw File  
agg\_pep\_sort\_pos\_2

Scan  
16988

Method  
FTMS; HCD

Score  
109.24

m/z  
815.88

Gene names  
AKAP12

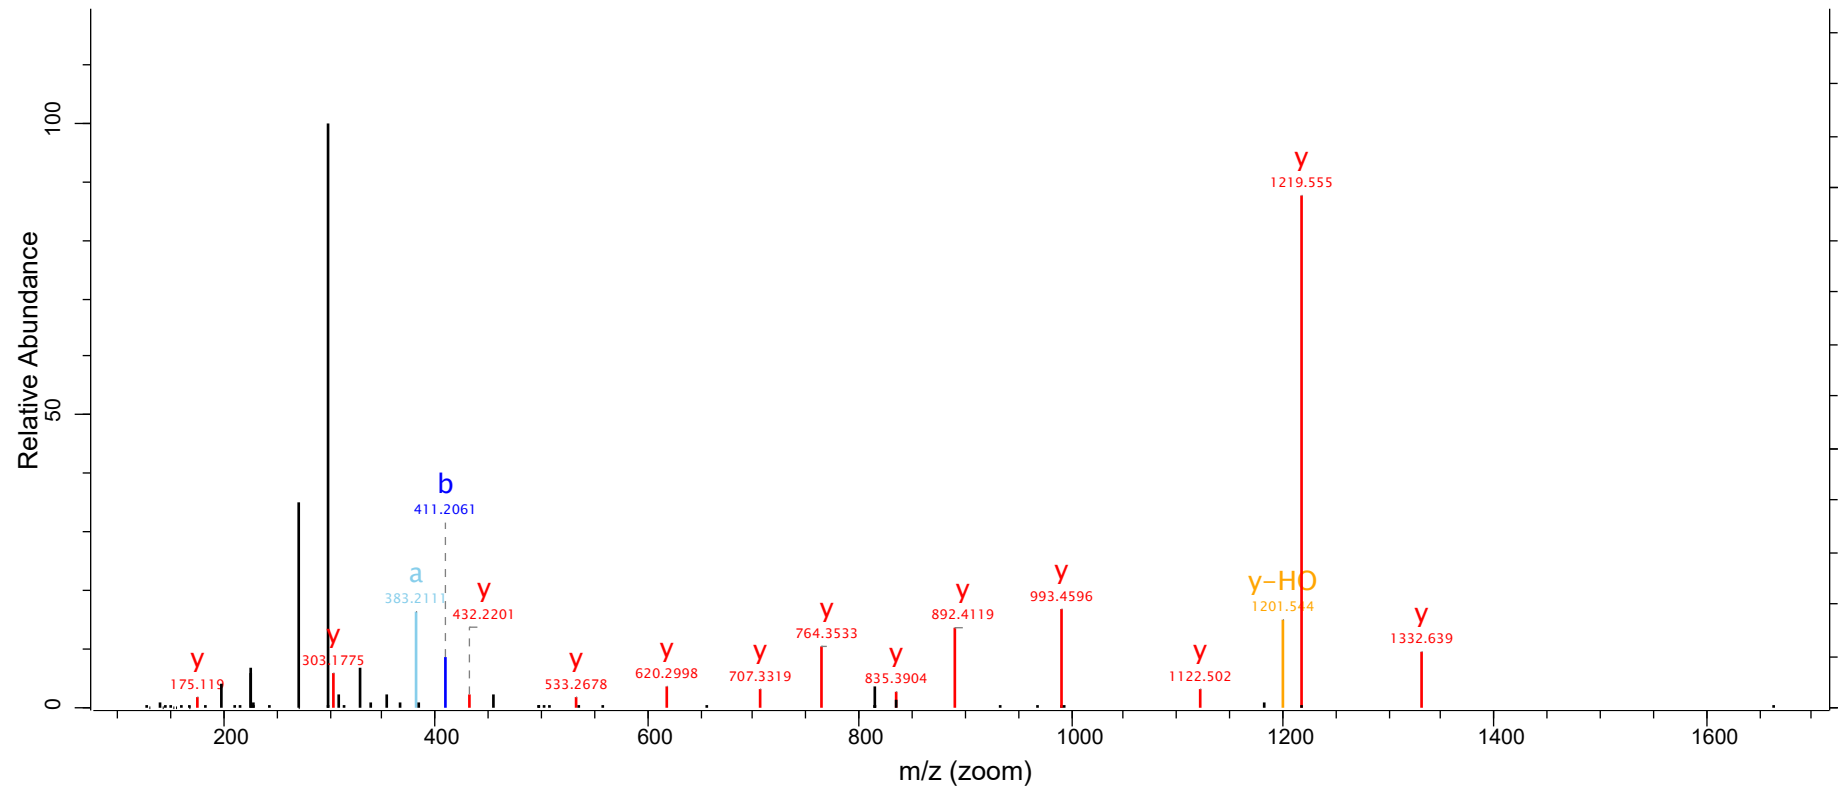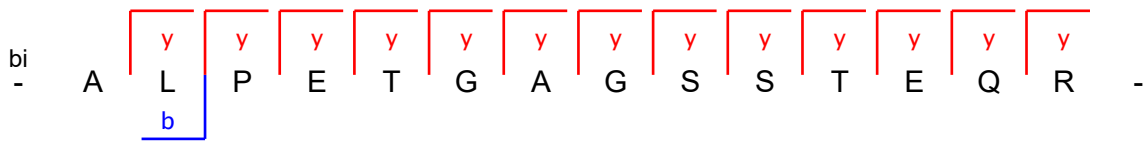

Raw File  
agg\_pep\_sort\_pos\_1

Scan  
20649

Method  
FTMS; HCD

Score  
52.52

m/z  
661.34

Gene names  
ANKS1A

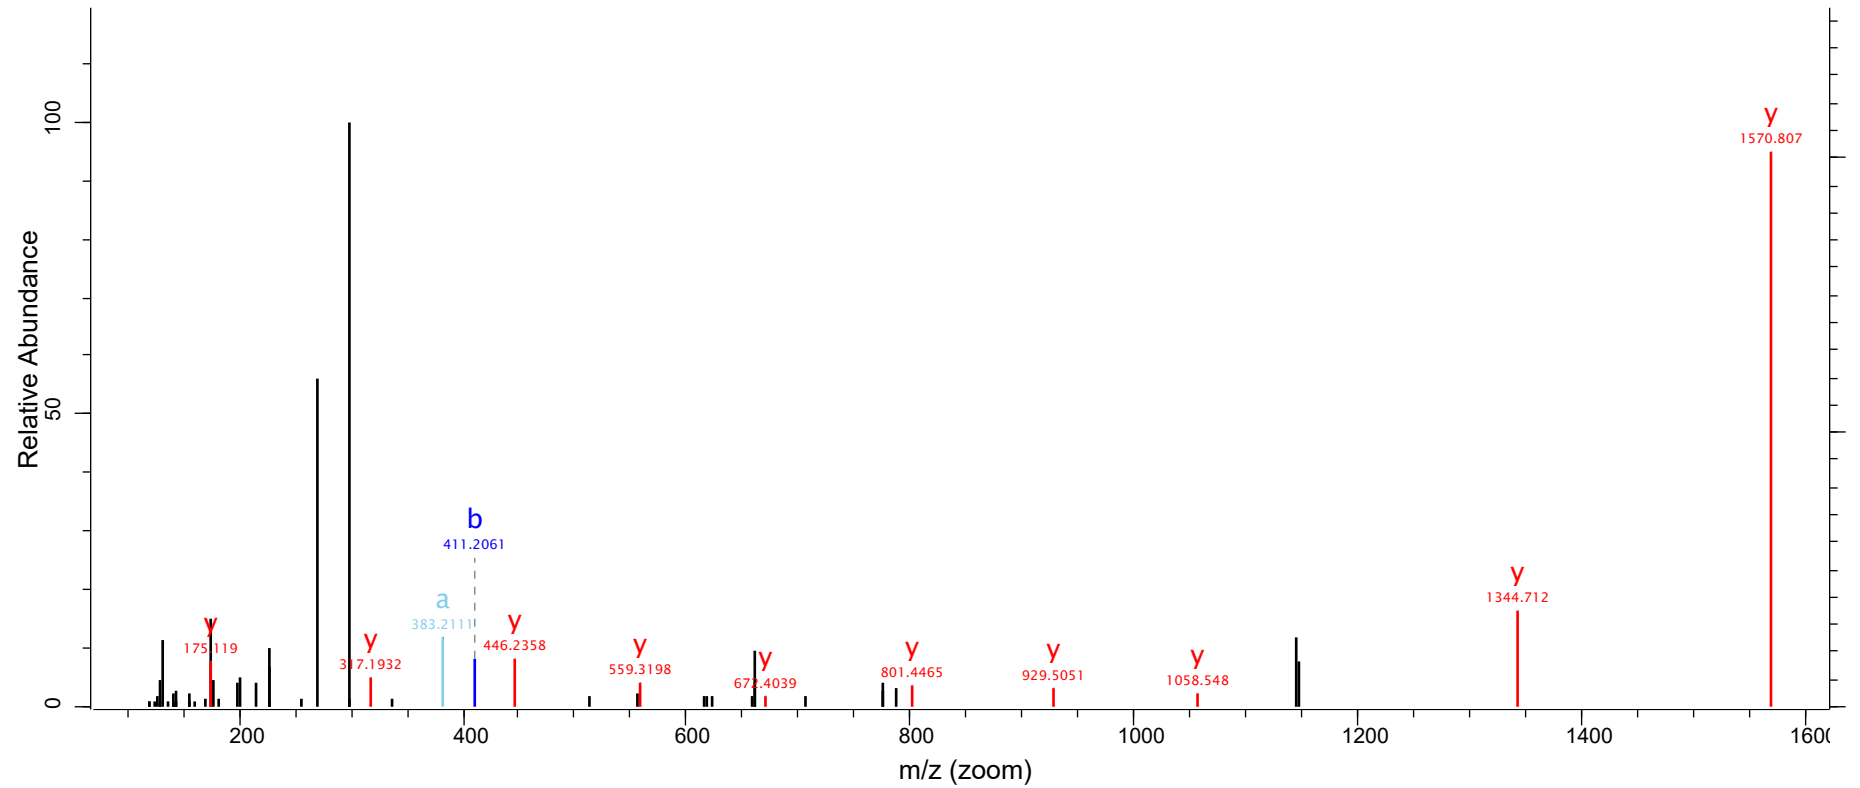

bi  
- bi  
A L P E T G K E Q E L L E A A R -

Fragmentation diagram showing peptide sequence: A L P E T G K E Q E L L E A A R. Red brackets above the sequence indicate b and y ion fragments. A blue bracket below the sequence indicates a b ion fragment.

Raw File  
agg\_pep\_sort\_pos\_1

Scan  
22174

Method  
FTMS; HCD

Score  
56.36

m/z  
864.42

Gene names  
APLF

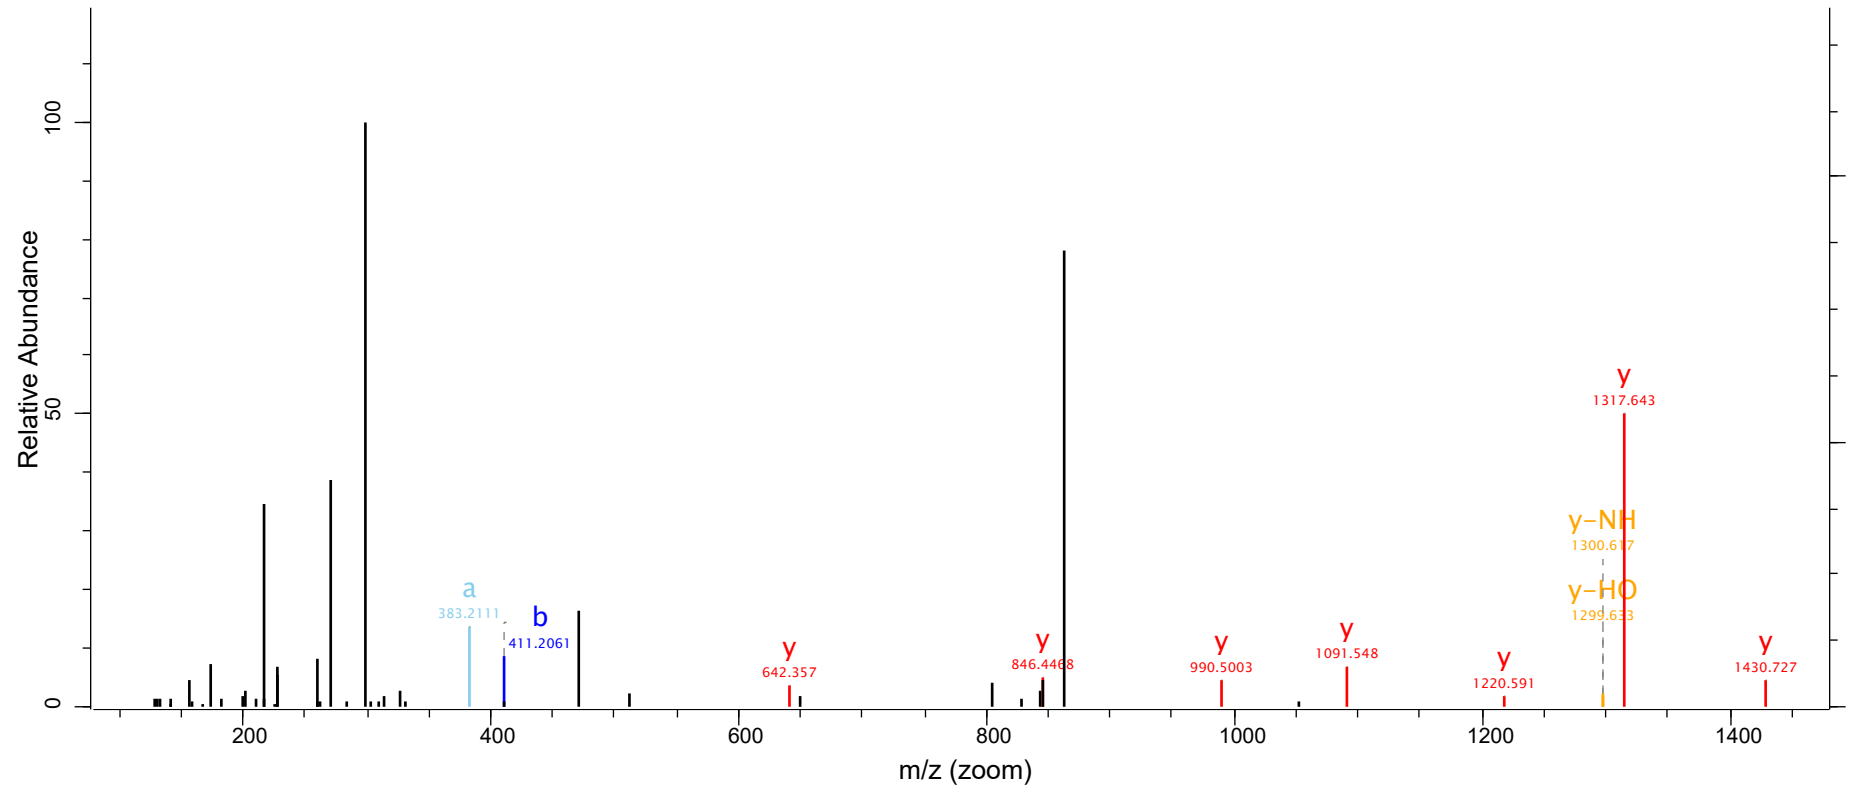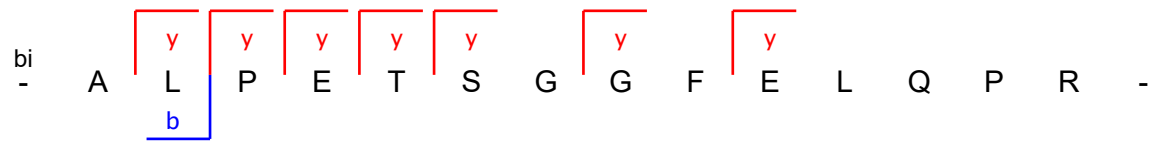



Raw File  
agg\_pep\_sort\_pos\_1

Scan  
31832

Method  
FTMS; HCD

Score  
168.69

m/z  
880.96

Gene names  
ARF1

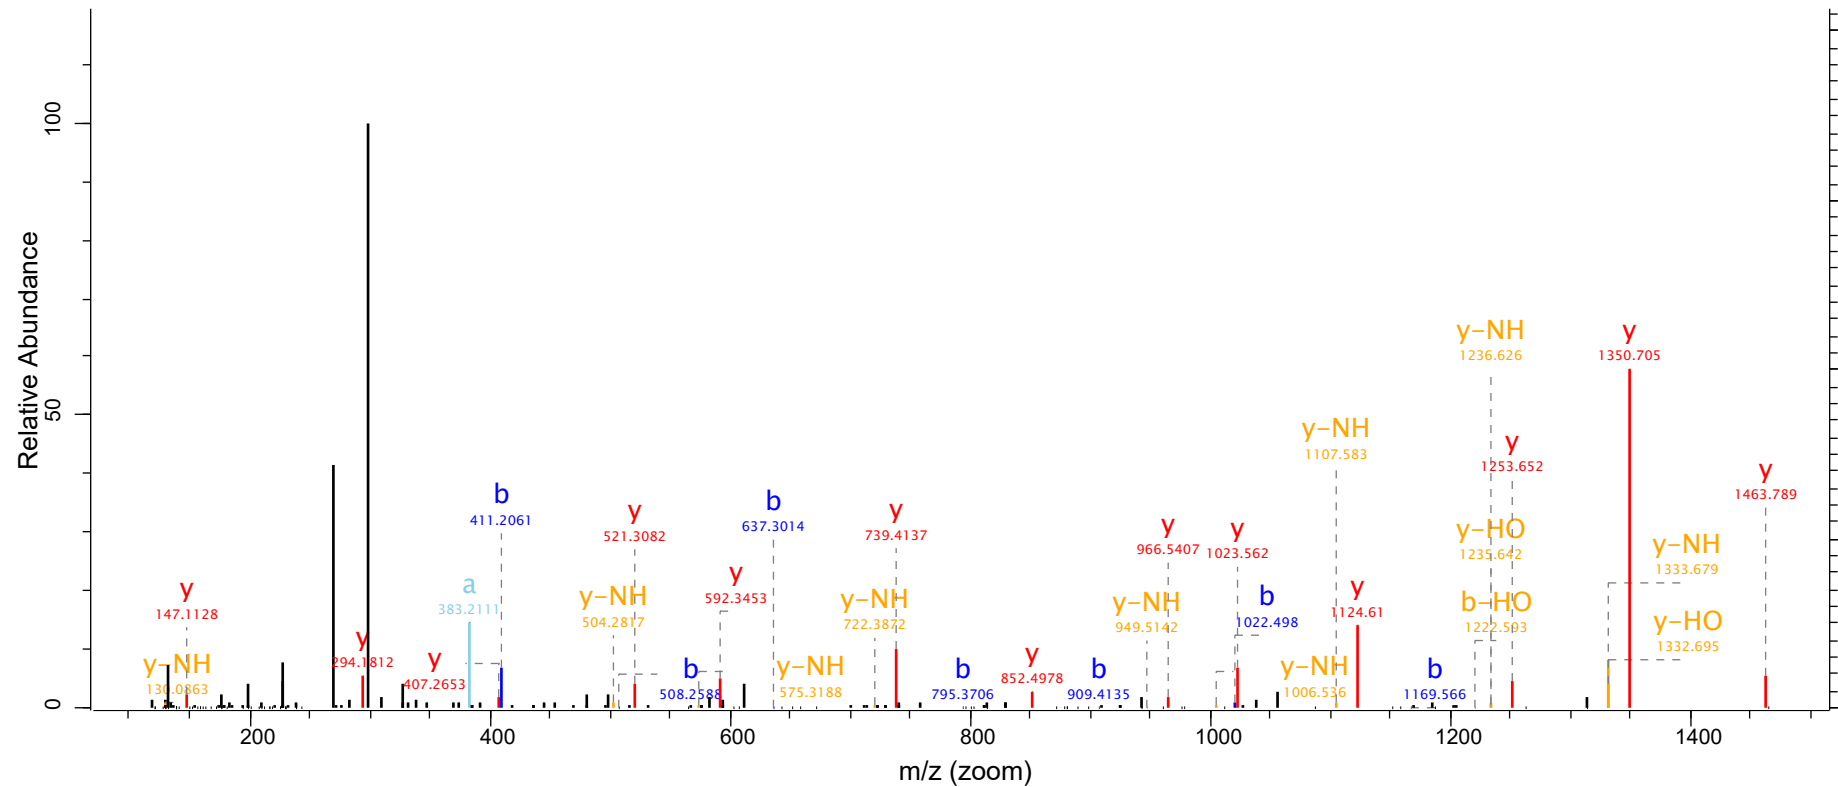

bi

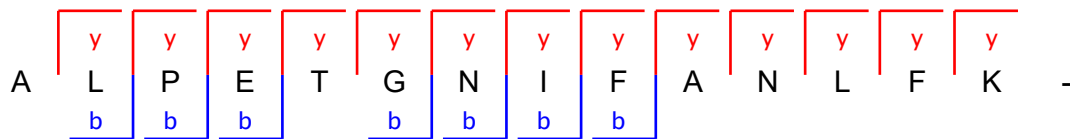

Raw File  
agg\_pep\_sort\_pos\_1

Scan  
31640

Method  
FTMS; HCD

Score  
190.86

m/z  
857.46

Gene names  
ARF3

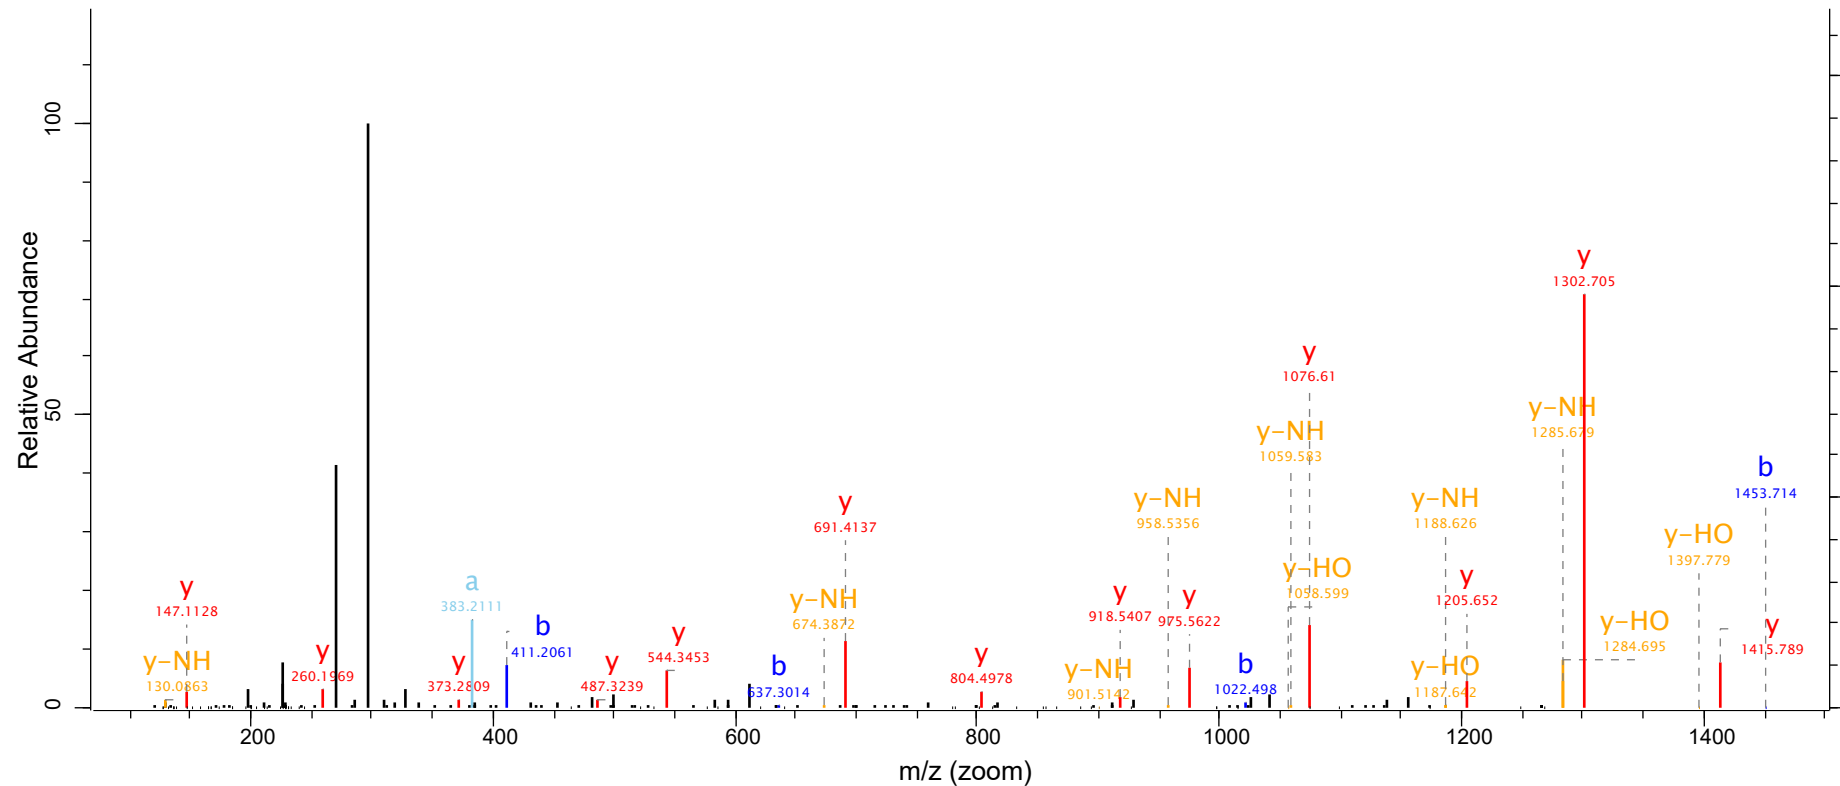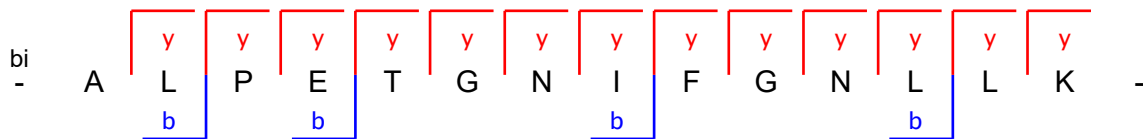

Raw File  
agg\_pep\_sort\_pos\_1

Scan  
31721

Method  
FTMS; HCD

Score  
250.26

m/z  
909.48

Gene names  
ARF4

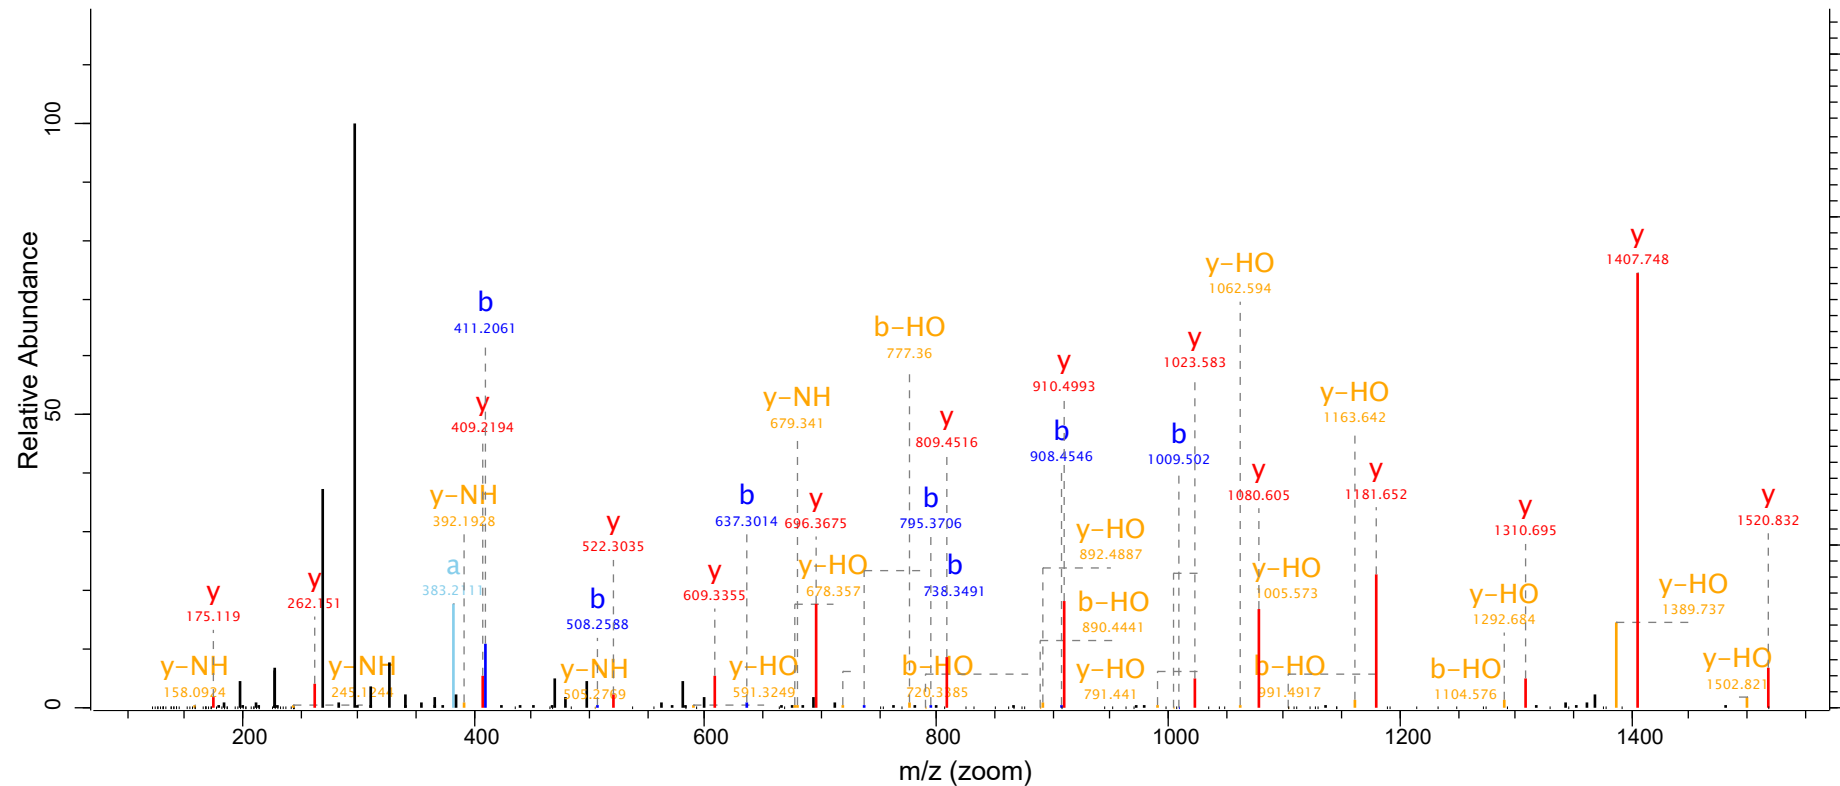

- bi

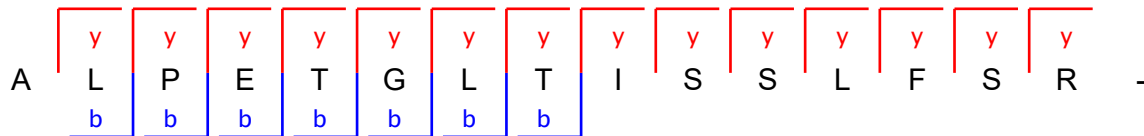

Raw File  
agg\_pep\_sort\_pos\_3

Scan  
31282

Method  
FTMS; HCD

Score  
207.88

m/z  
894.47

Gene names  
ARF5

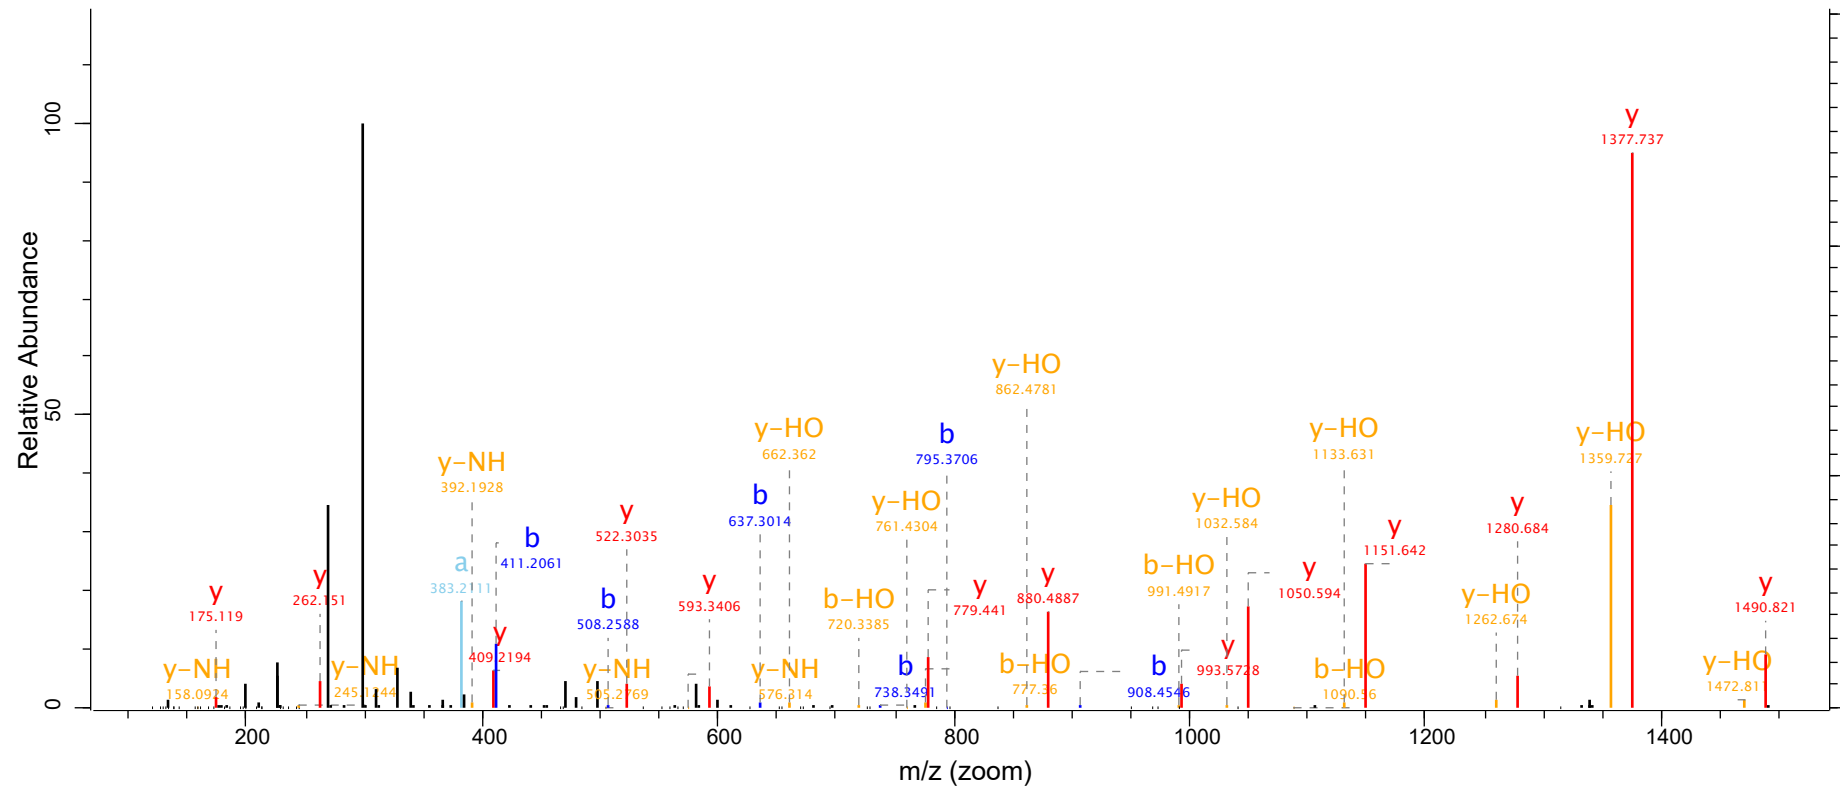

- bi

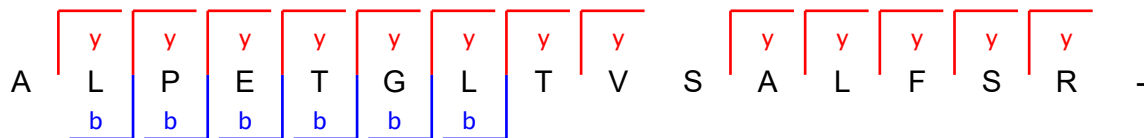

Raw File  
agg\_pep\_sort\_pos\_3

Scan  
7498

Method  
FTMS; HCD

Score  
27.9

m/z  
562.08

Gene names  
ARGFX

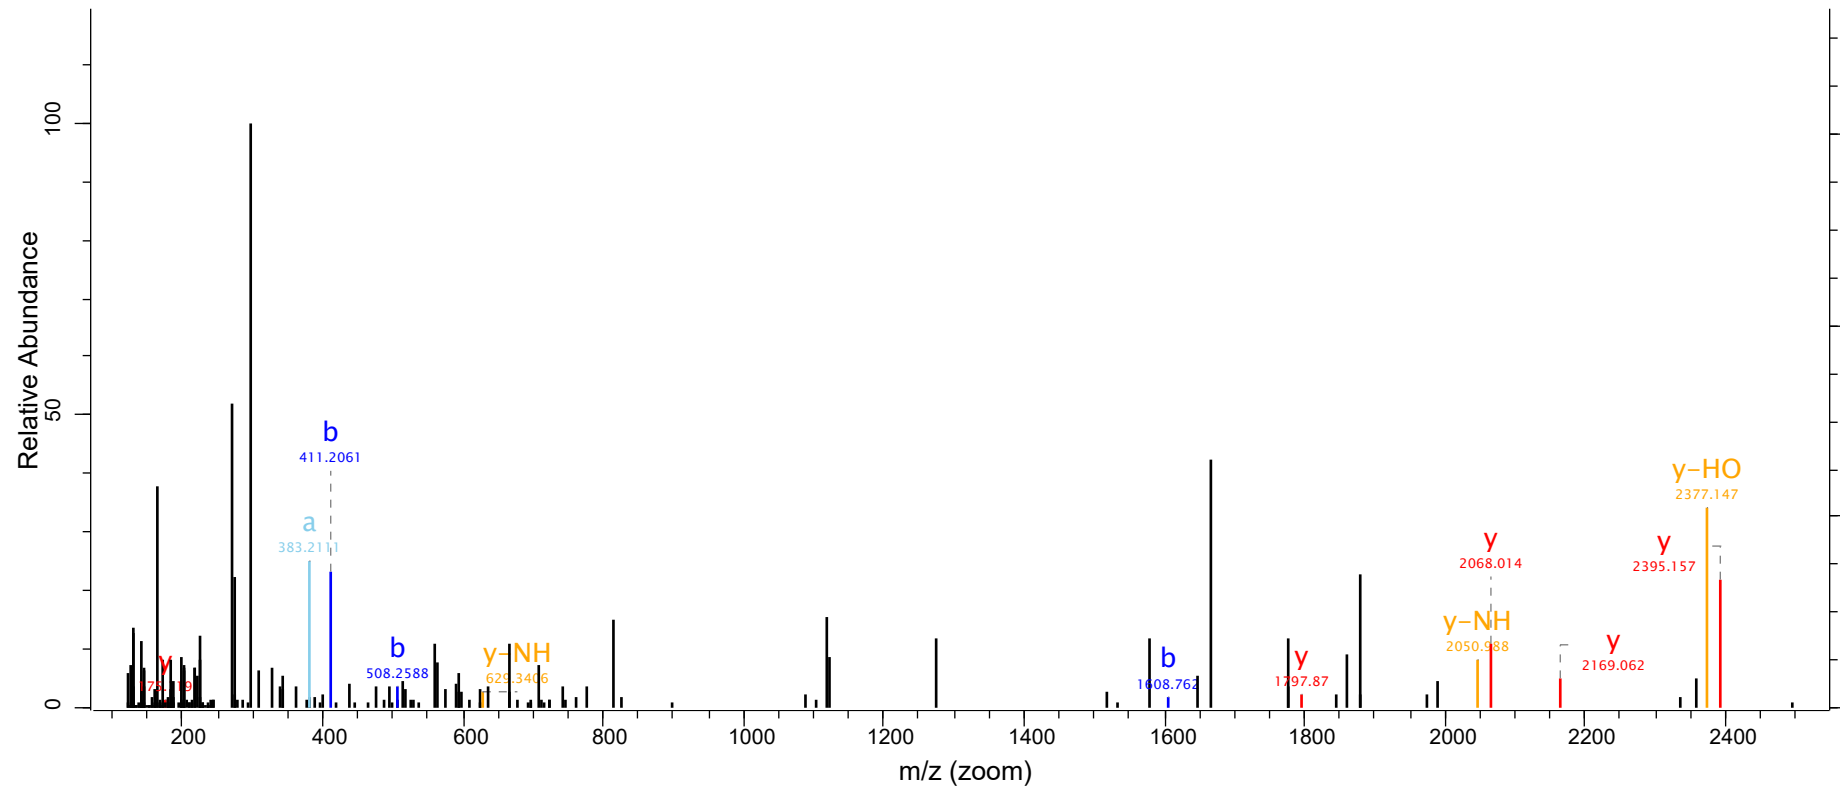

bi

A L P E T R N R M<sup>ox</sup> A P E N P Q P D P F I N R -

Fragmentation diagram showing b-ions (blue) and y-ions (red) for the peptide sequence: A L P E T R N R M<sup>ox</sup> A P E N P Q P D P F I N R -.

Fragmentation sites are indicated by brackets below the sequence:

- Red brackets (y-ions) connect P to E, T to R, R to N, and N to R.
- Blue brackets (b-ions) connect L to P, P to E, and E to N.

Raw File  
agg\_pep\_sort\_pos\_2

Scan  
17275

Method  
FTMS; HCD

Score  
98.52

m/z  
597.8

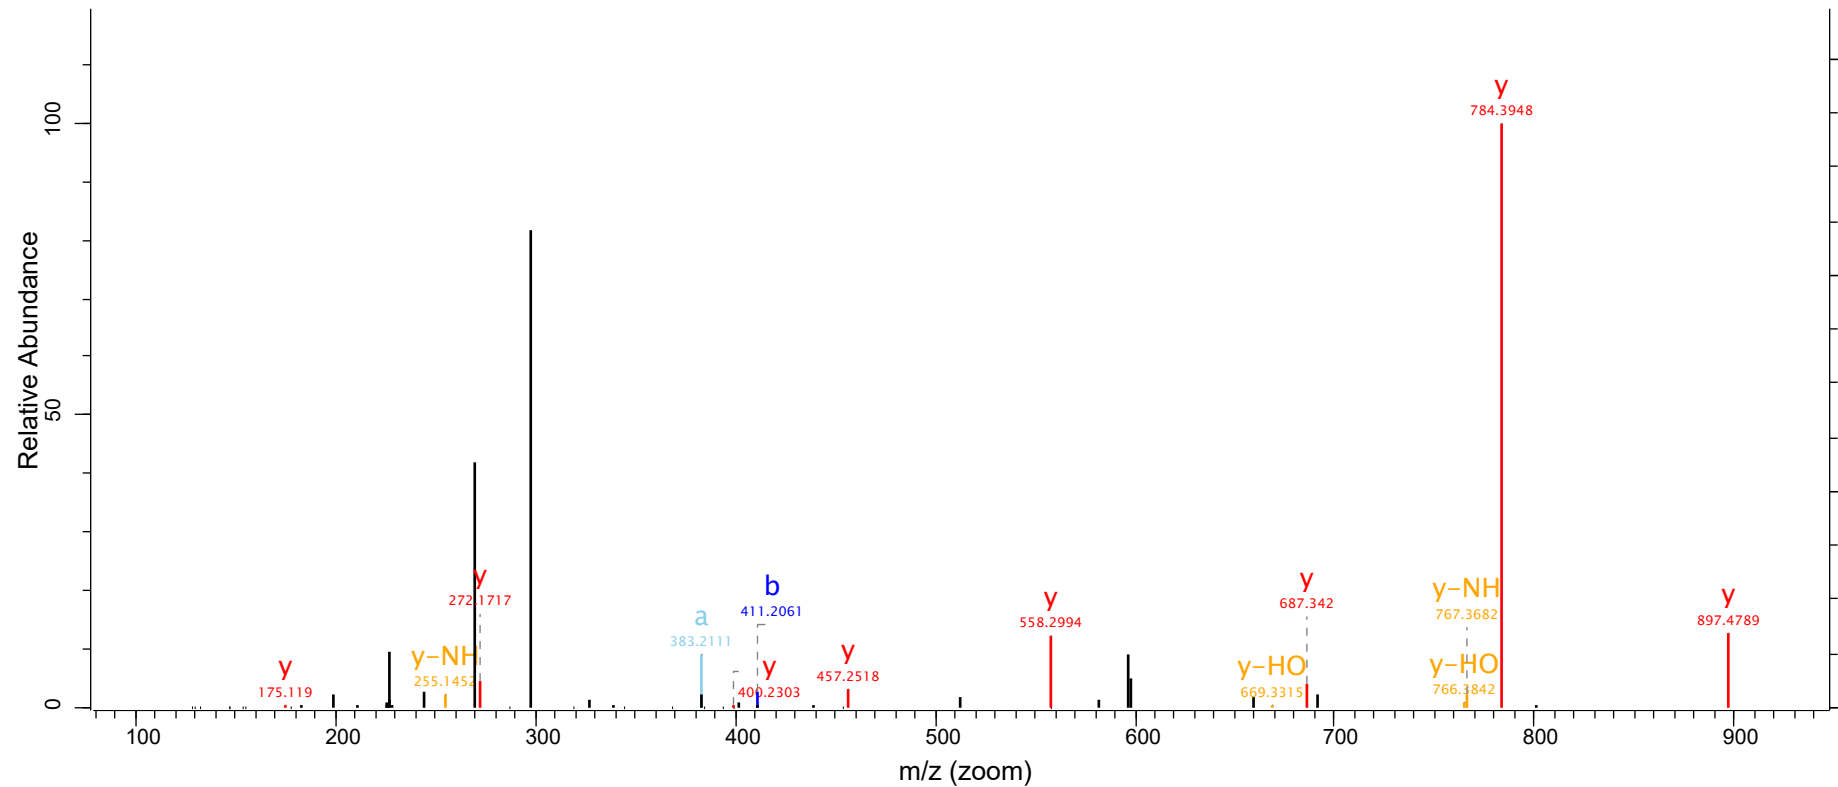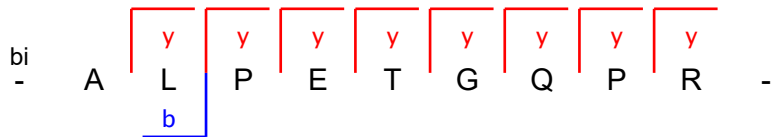

Raw File  
agg\_pep\_sort\_pos\_1

Scan  
26814

Method  
FTMS; HCD

Score  
107.06

m/z  
811.98

Gene names  
ARL2

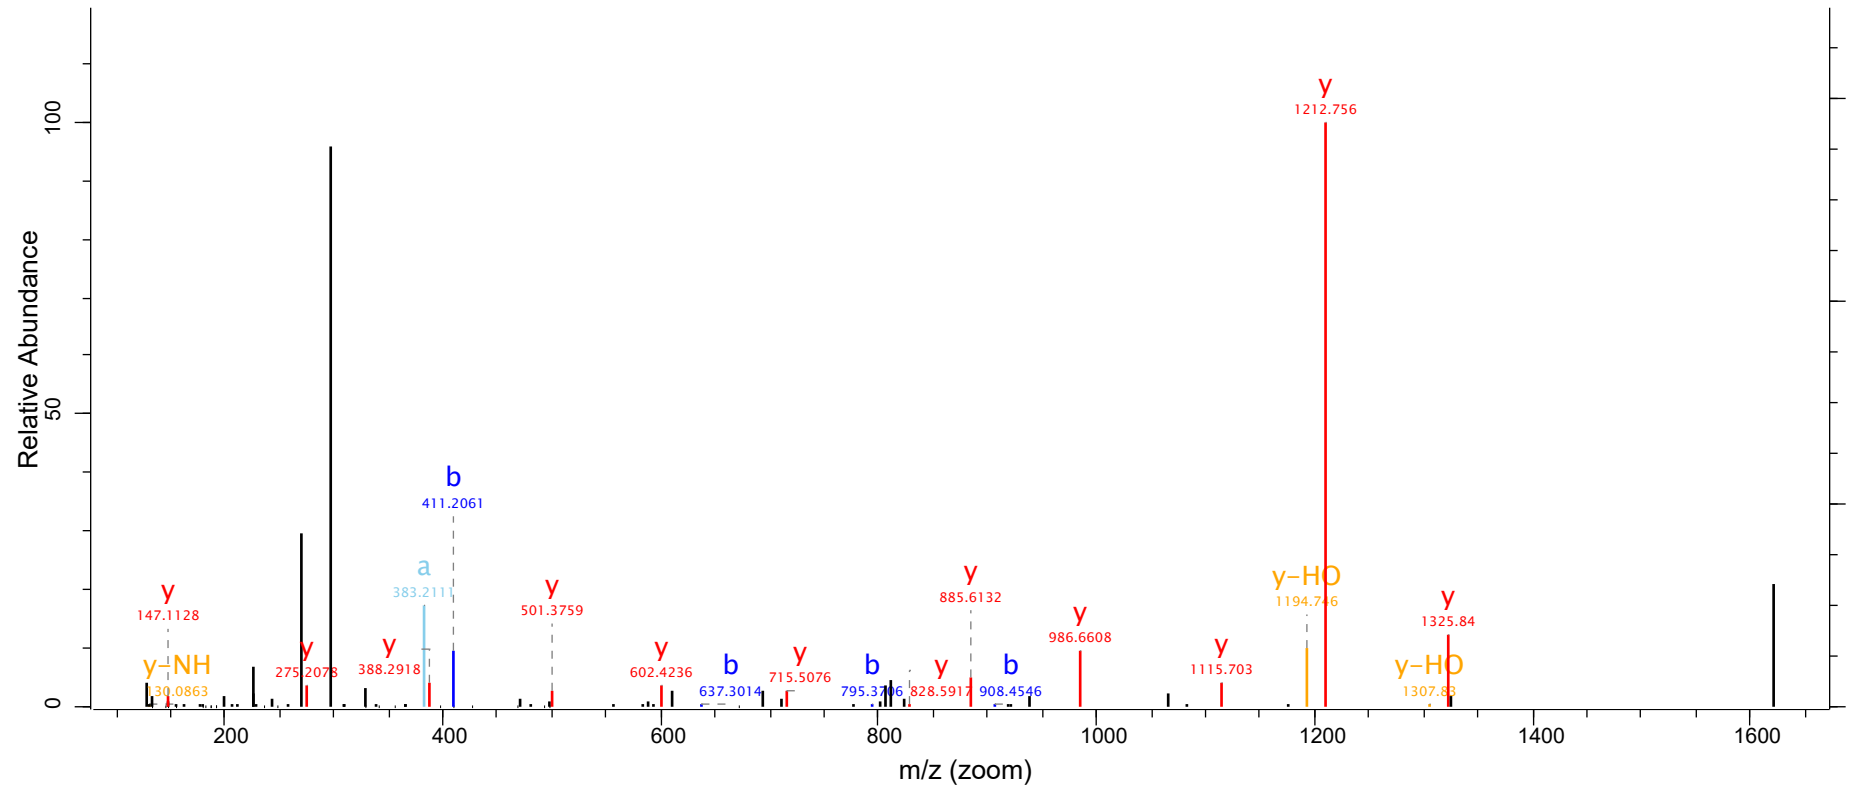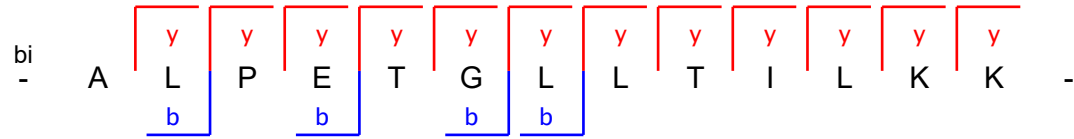

Raw File  
agg\_pep\_sort\_pos\_3

Scan  
31323

Method  
FTMS; HCD

Score  
98.05

m/z  
747.94

Gene names  
ARL2

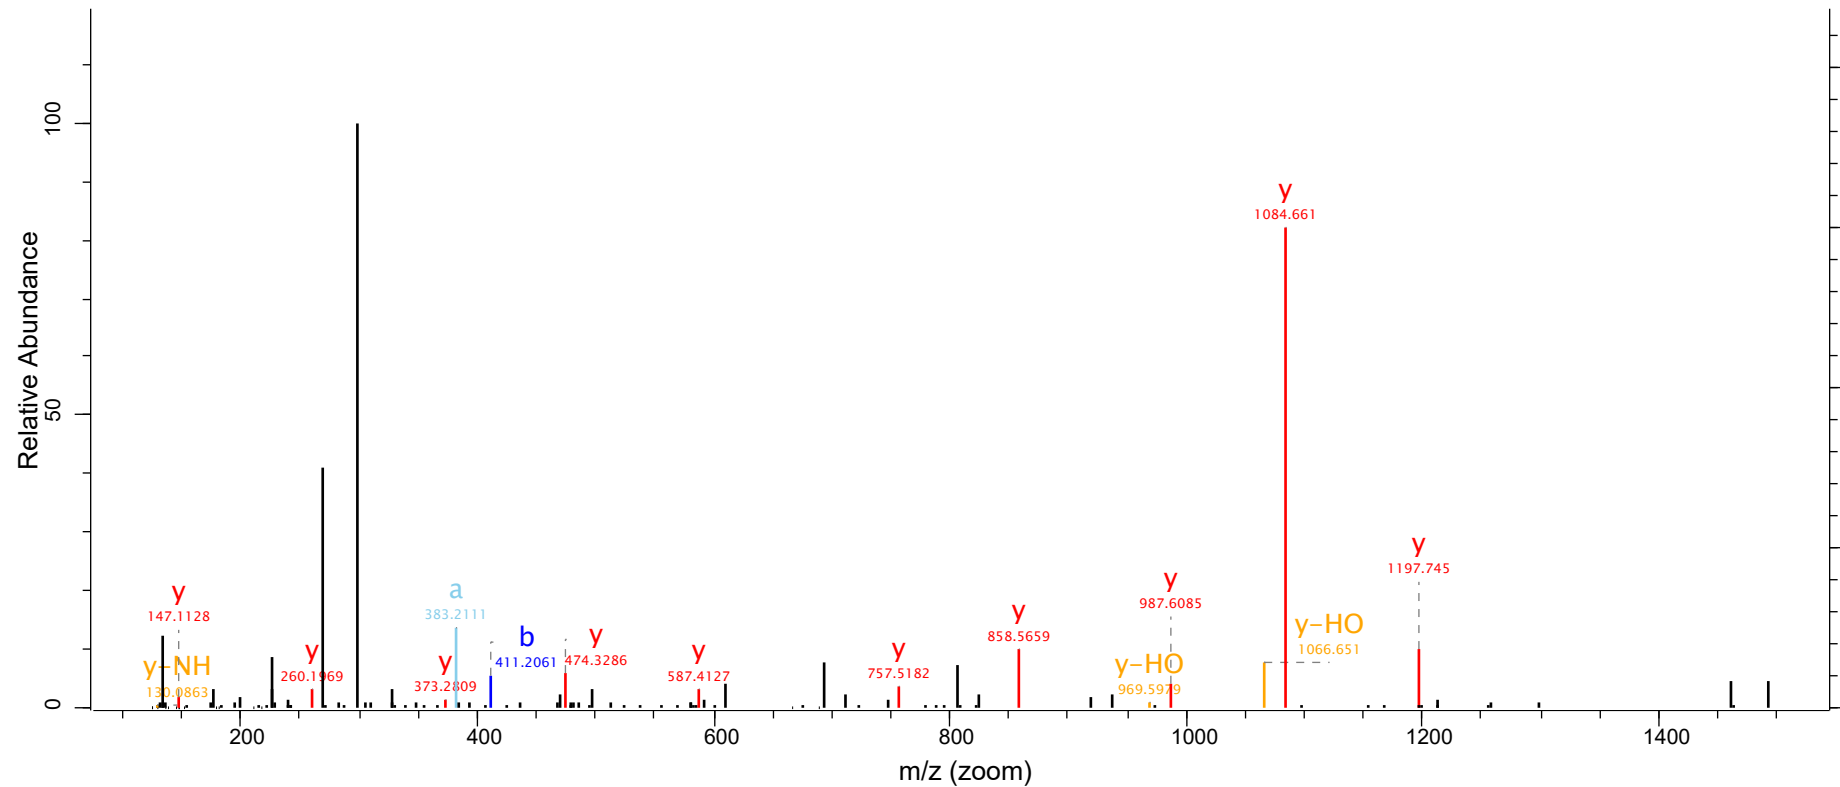

bi

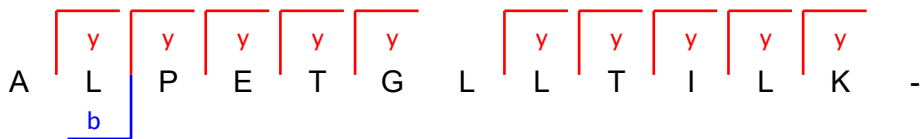



Raw File  
agg\_pep\_sort\_pos\_1

Scan  
18578

Method  
FTMS; HCD

Score  
68.07

m/z  
1085.04

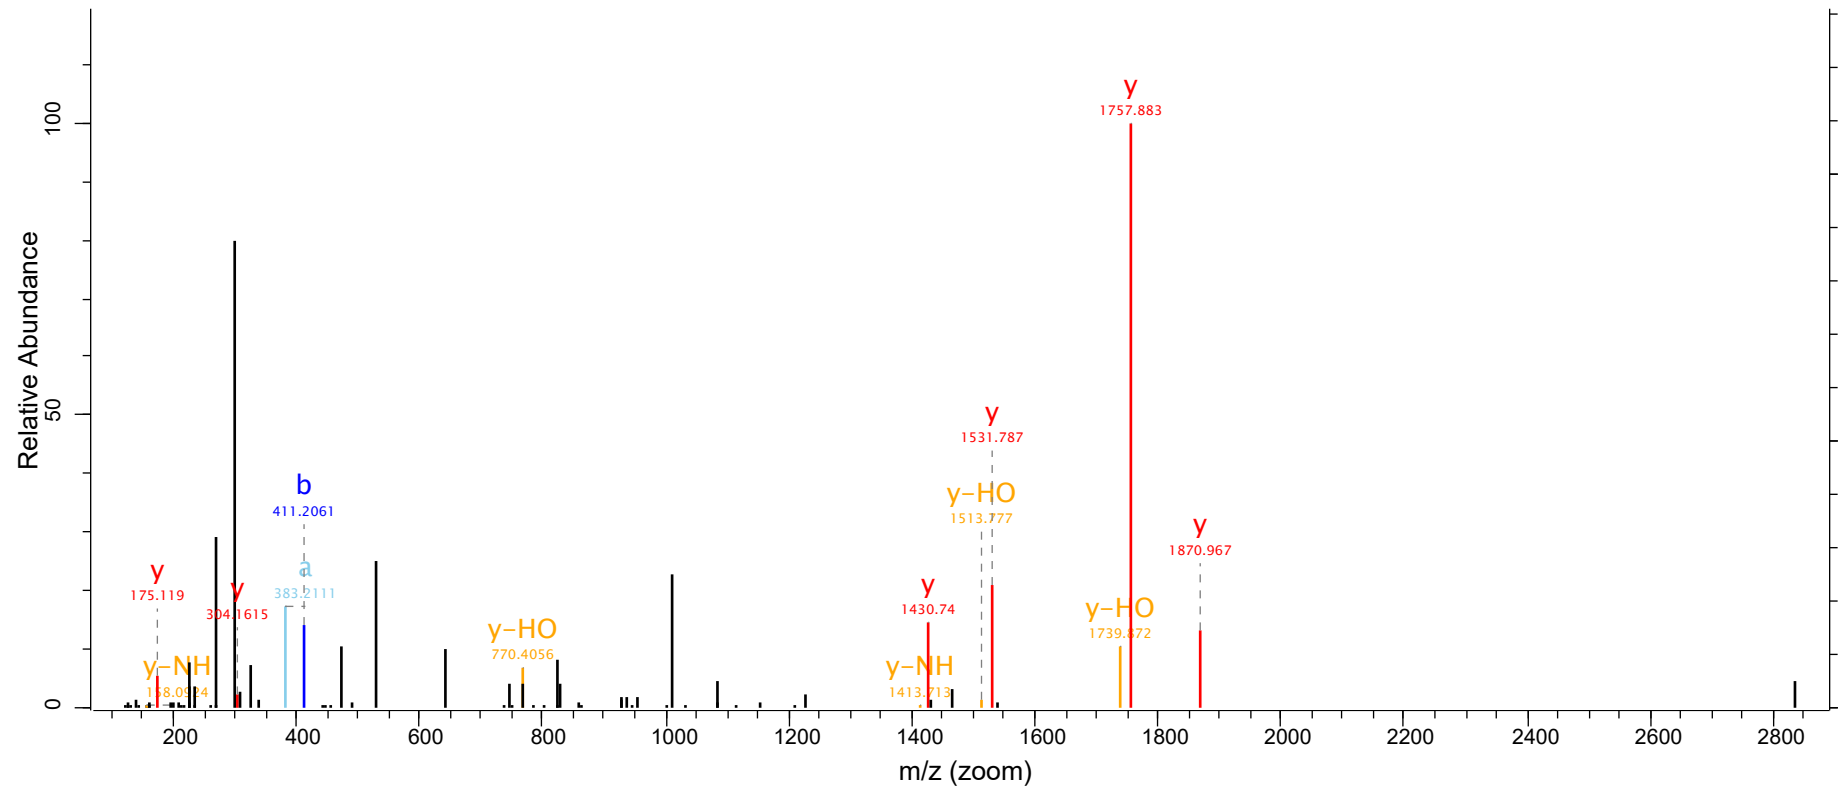

bi

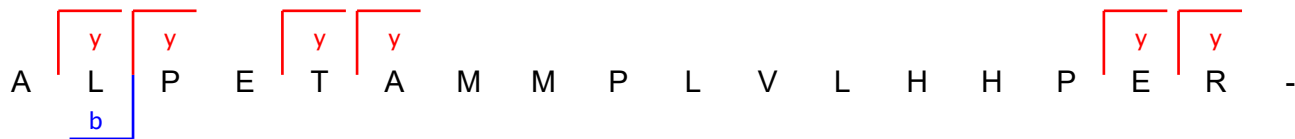

Raw File  
agg\_pep\_sort\_pos\_1

Scan  
14207

Method  
FTMS; HCD

Score  
67.99

m/z  
656.34

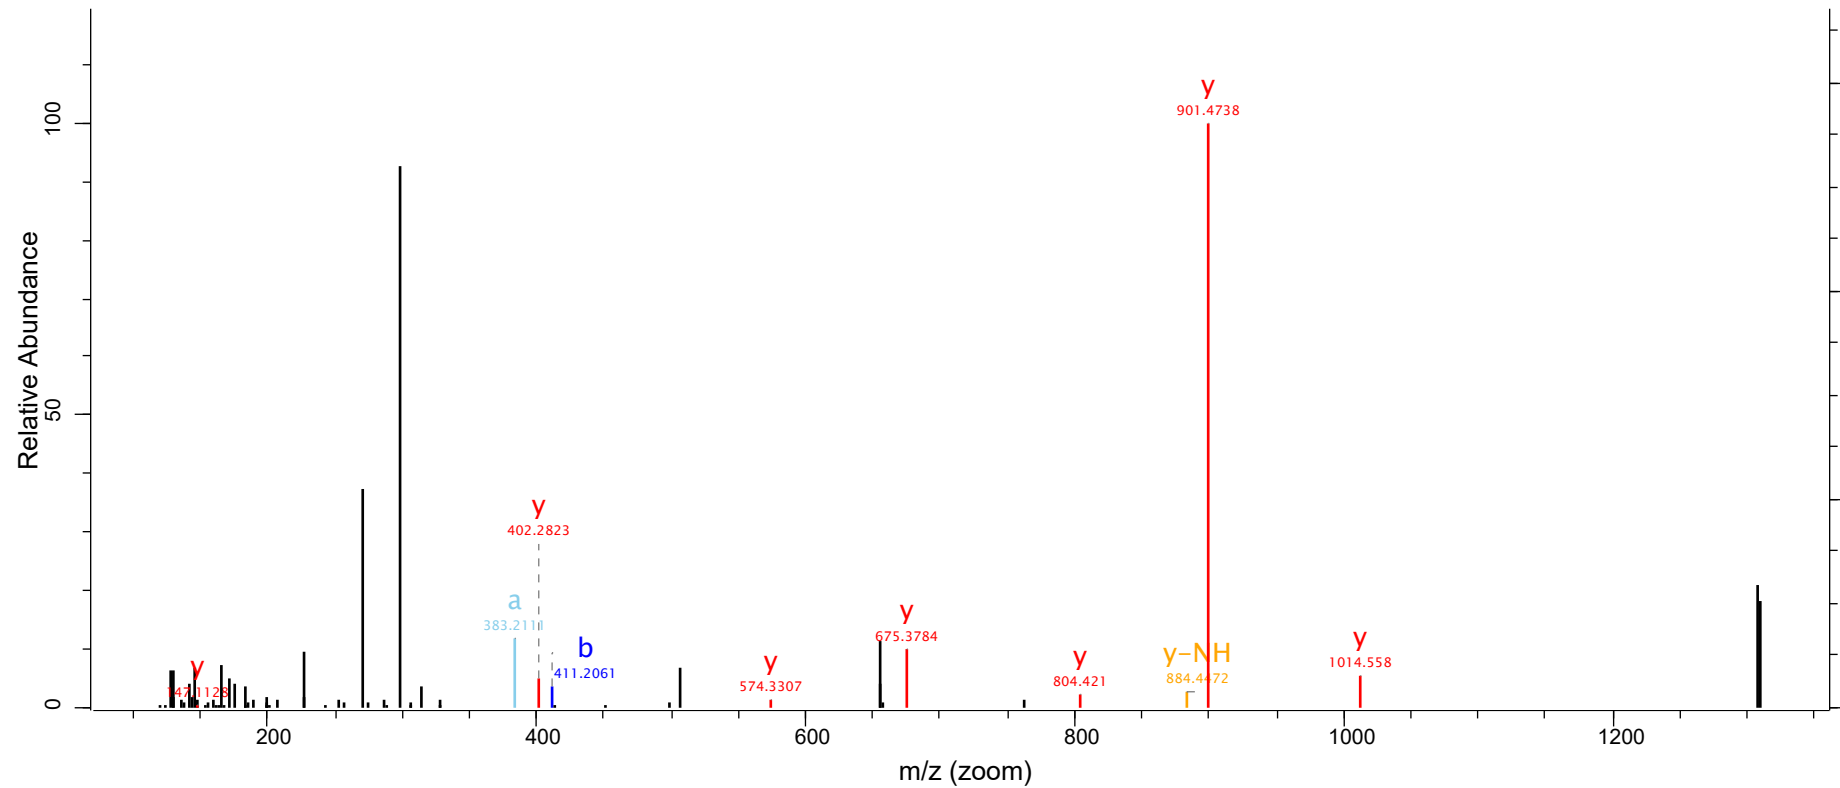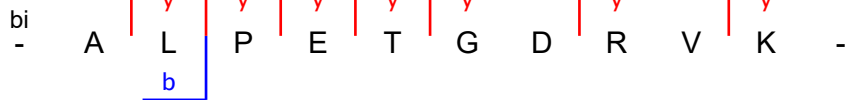

Raw File  
agg\_pep\_sort\_pos\_1

Scan  
9512

Method  
FTMS; HCD

Score  
57.84

m/z  
495.6

Gene names  
ATP1B3

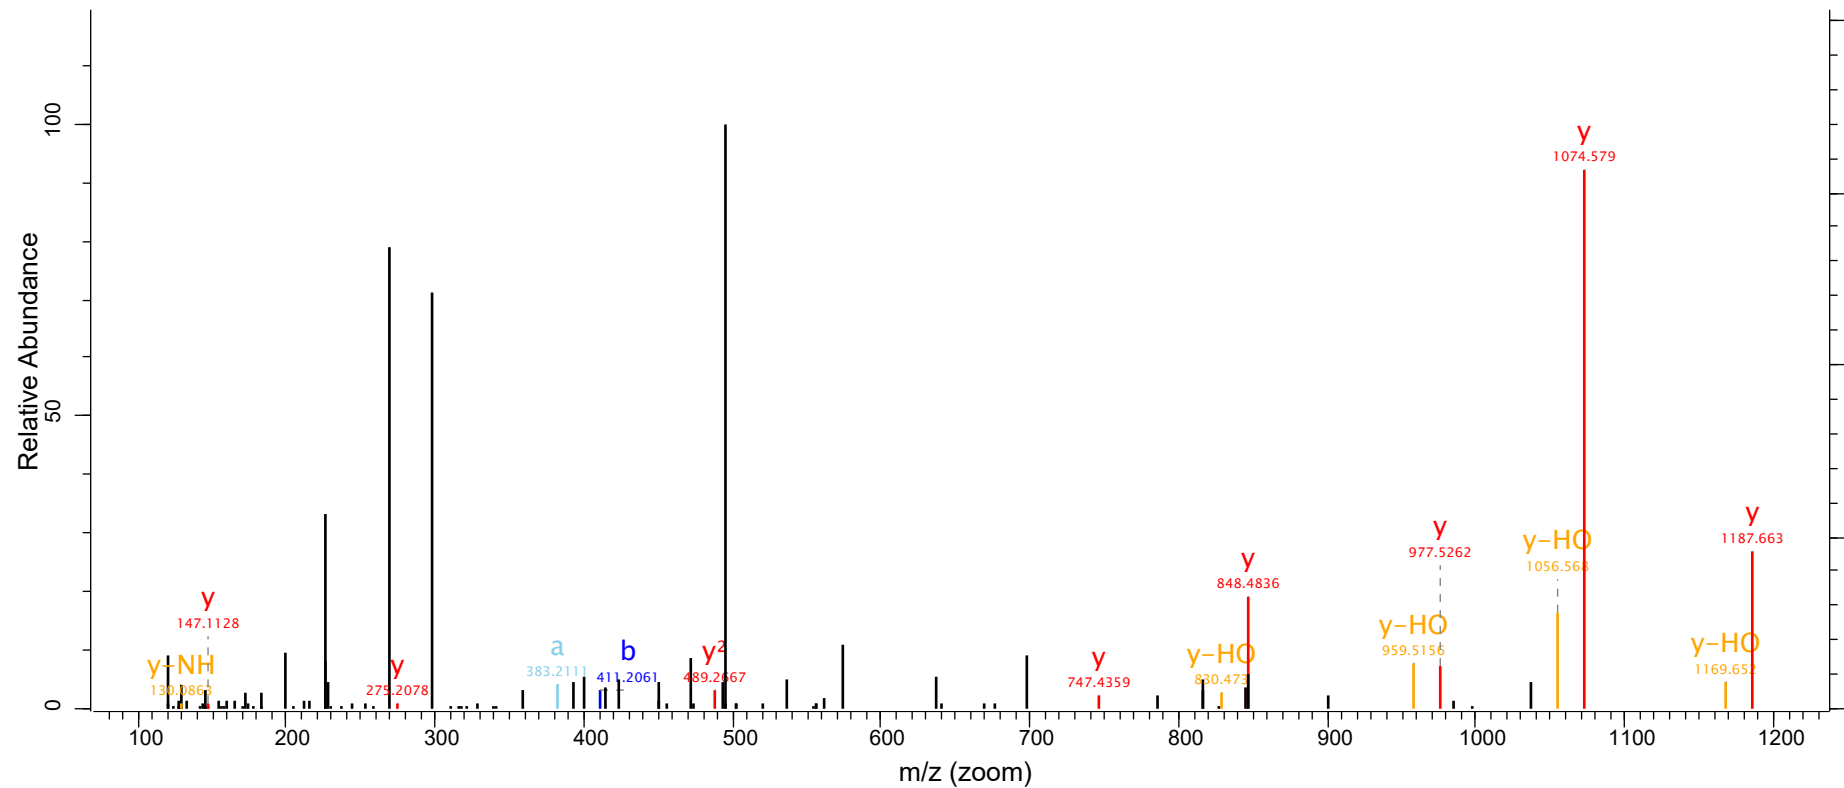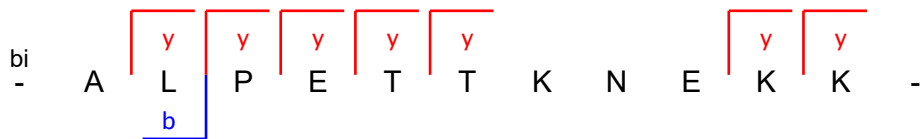

Raw File  
agg\_pep\_sort\_pos\_1

Scan  
17652

Method  
FTMS; HCD

Score  
38.03

m/z  
796.37

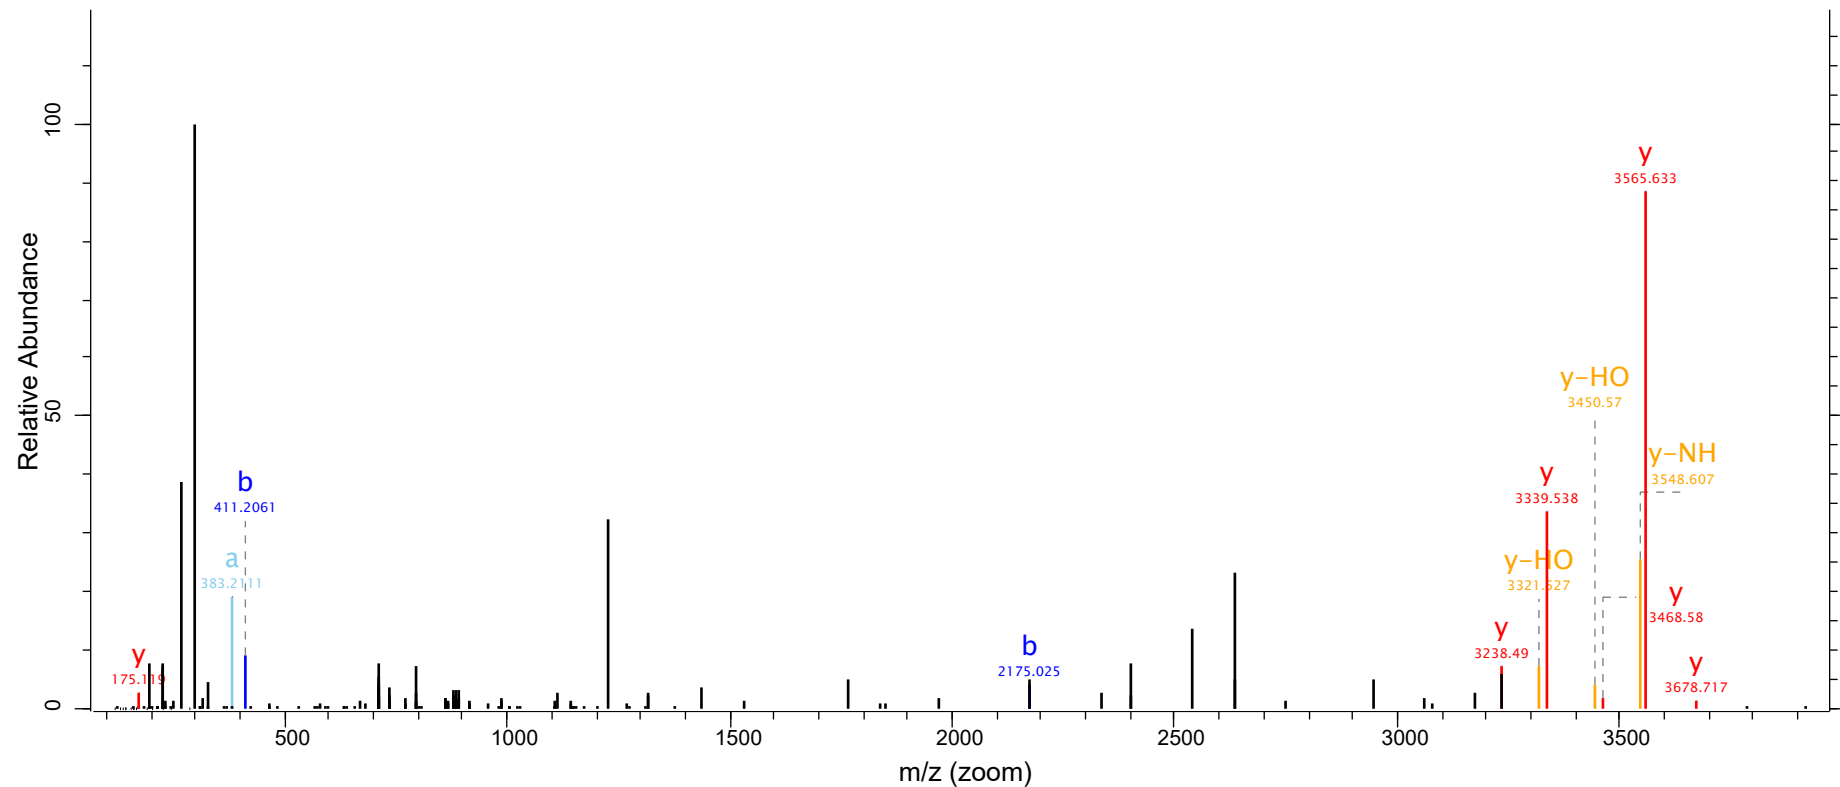

bi - A L P E T A V E V Q E Q W P C L P A A G C P G P  
L G G P V A A C G M<sup>ox</sup> S R -

Fragmentation diagram showing peptide sequences and fragmentation sites:

- Top sequence: A L P E T A V E V Q E Q W P C L P A A G C P G P
- Bottom sequence: L G G P V A A C G M<sup>ox</sup> S R -
- Red brackets indicate y-ions: L, P, E, T, A, P, A, G, C, P
- Blue brackets indicate b-ions: L, P, P

Raw File  
agg\_pep\_sort\_pos\_1

Scan  
12771

Method  
FTMS; HCD

Score  
47.55

m/z  
621

Gene names  
C11orf98

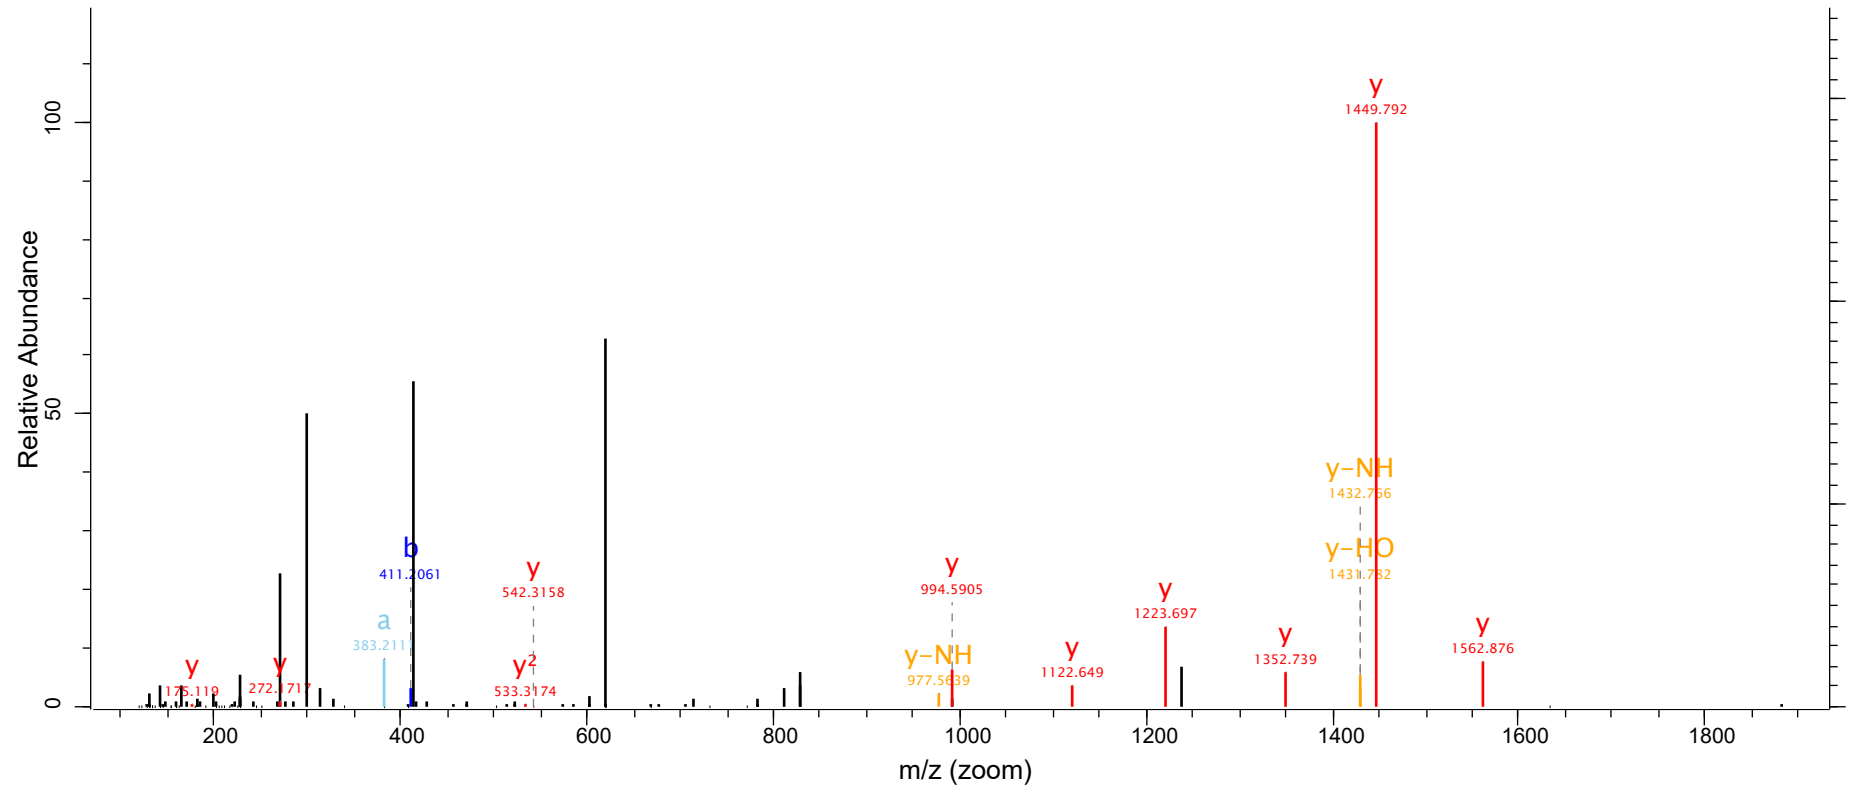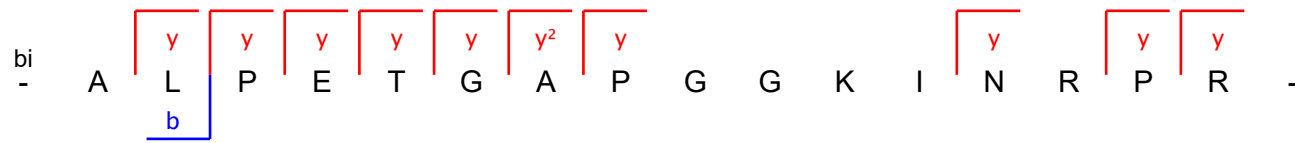

Raw File  
agg\_pep\_sort\_pos\_1

Scan  
17941

Method  
FTMS; HCD

Score  
95.5

m/z  
612.31

Gene names  
C11orf98

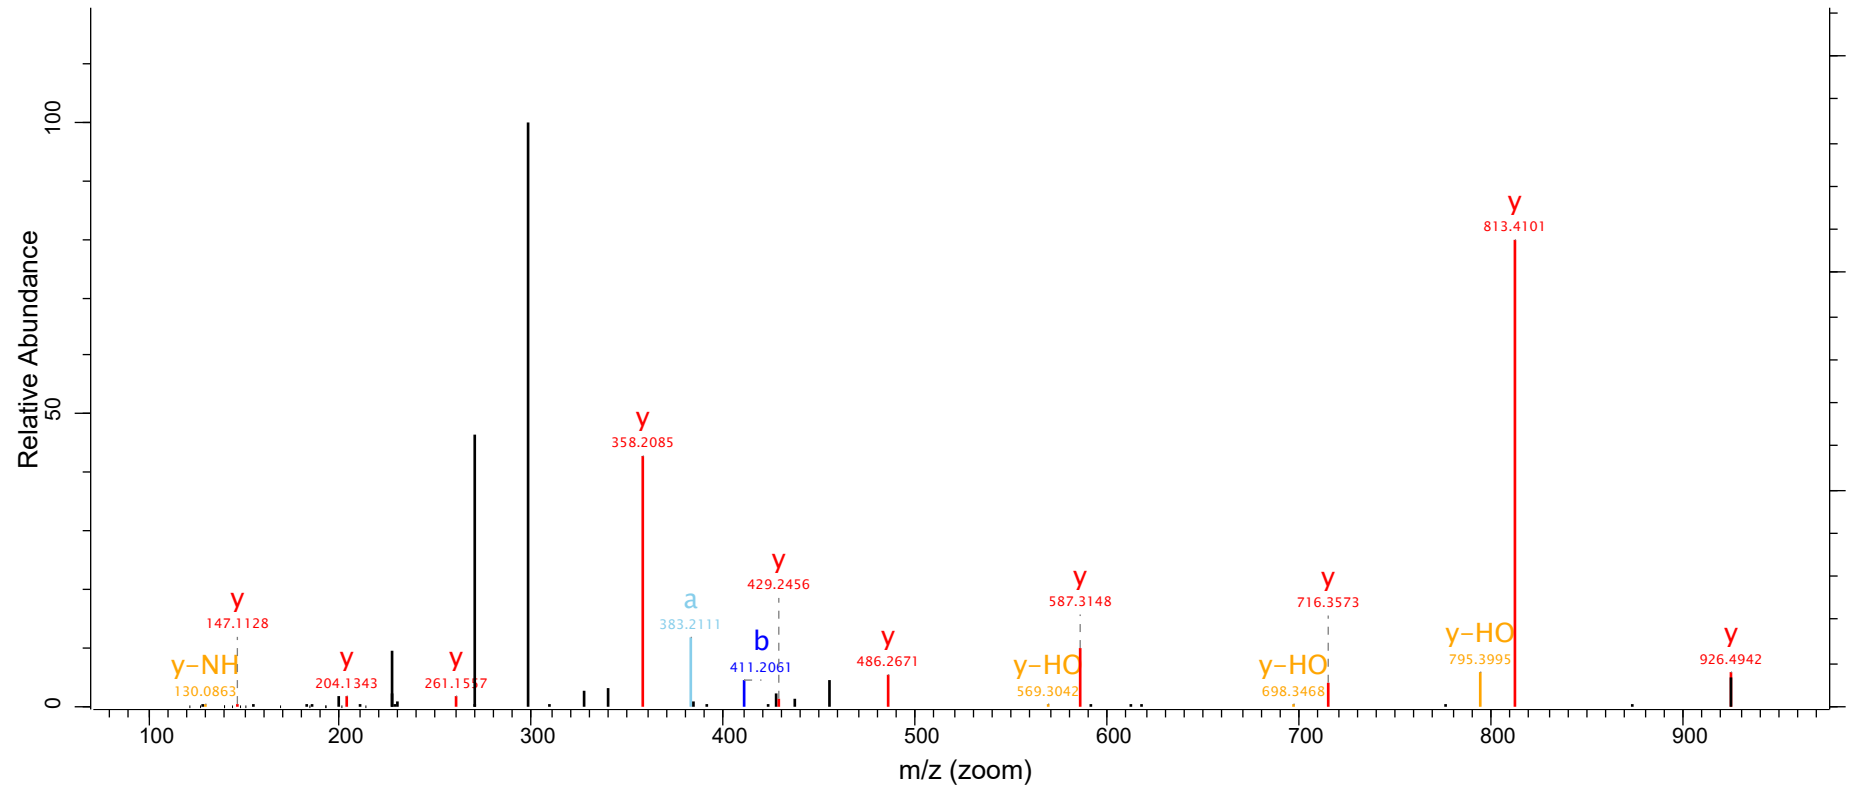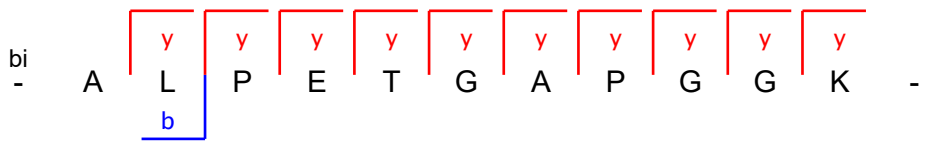

Raw File  
agg\_pep\_sort\_pos\_3

Scan  
15078

Method  
FTMS; HCD

Score  
111.04

m/z  
654.36

Gene names  
C8orf86

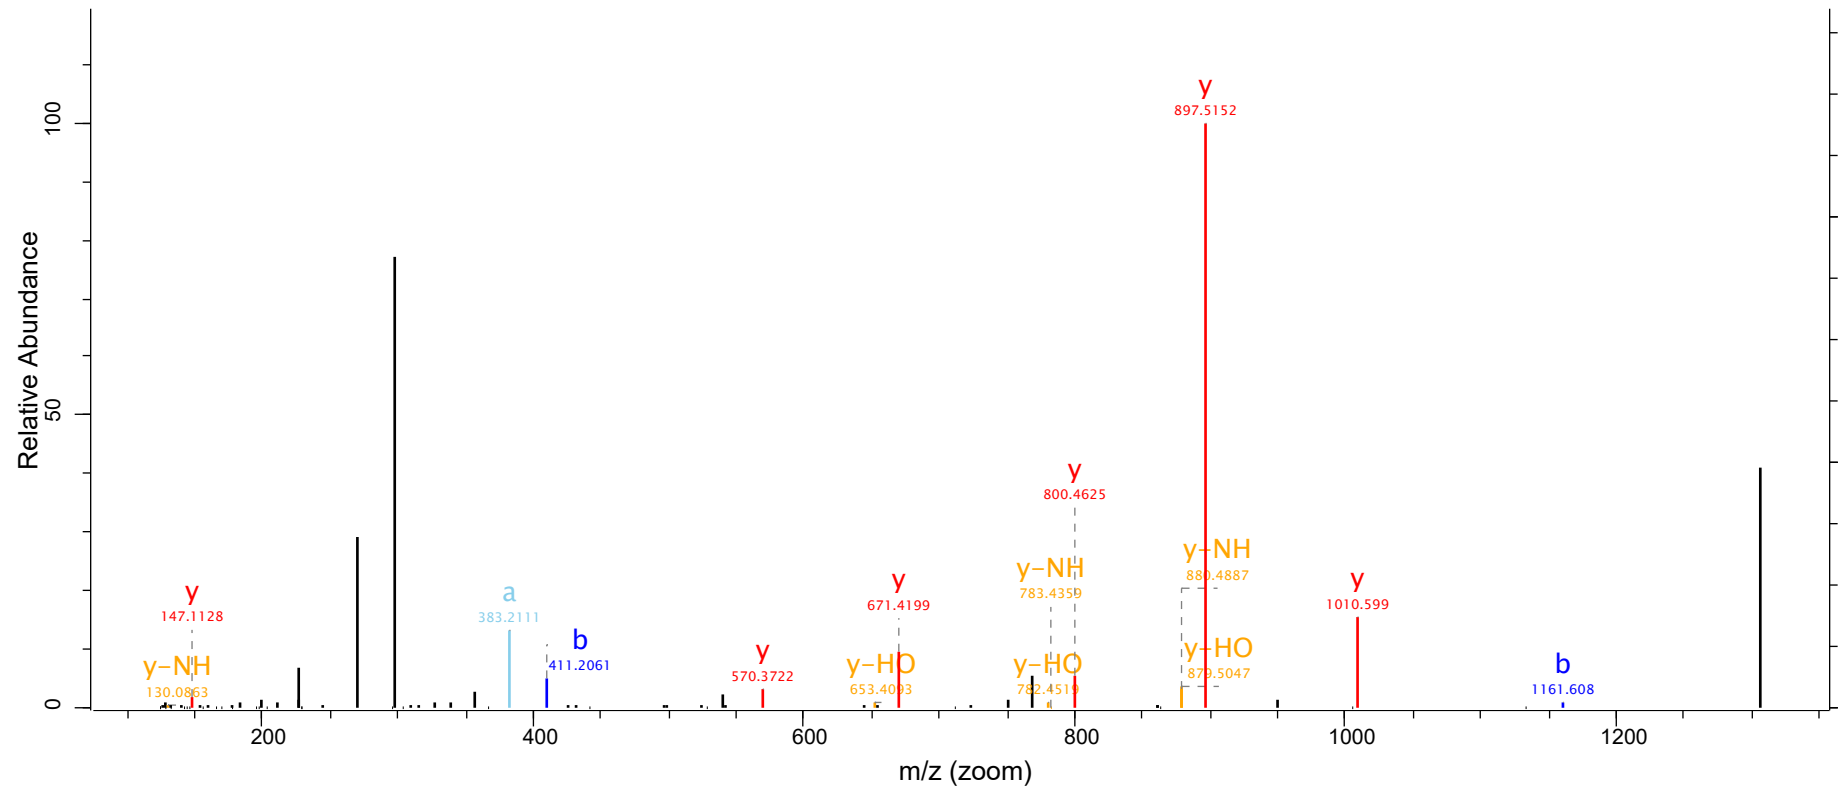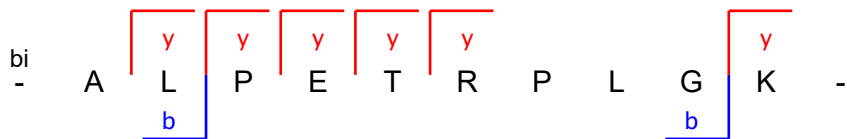

Raw File  
agg\_pep\_sort\_pos\_3

Scan  
16400

Method  
FTMS; HCD

Score  
94.3

m/z  
643.8

Gene names  
CABP2

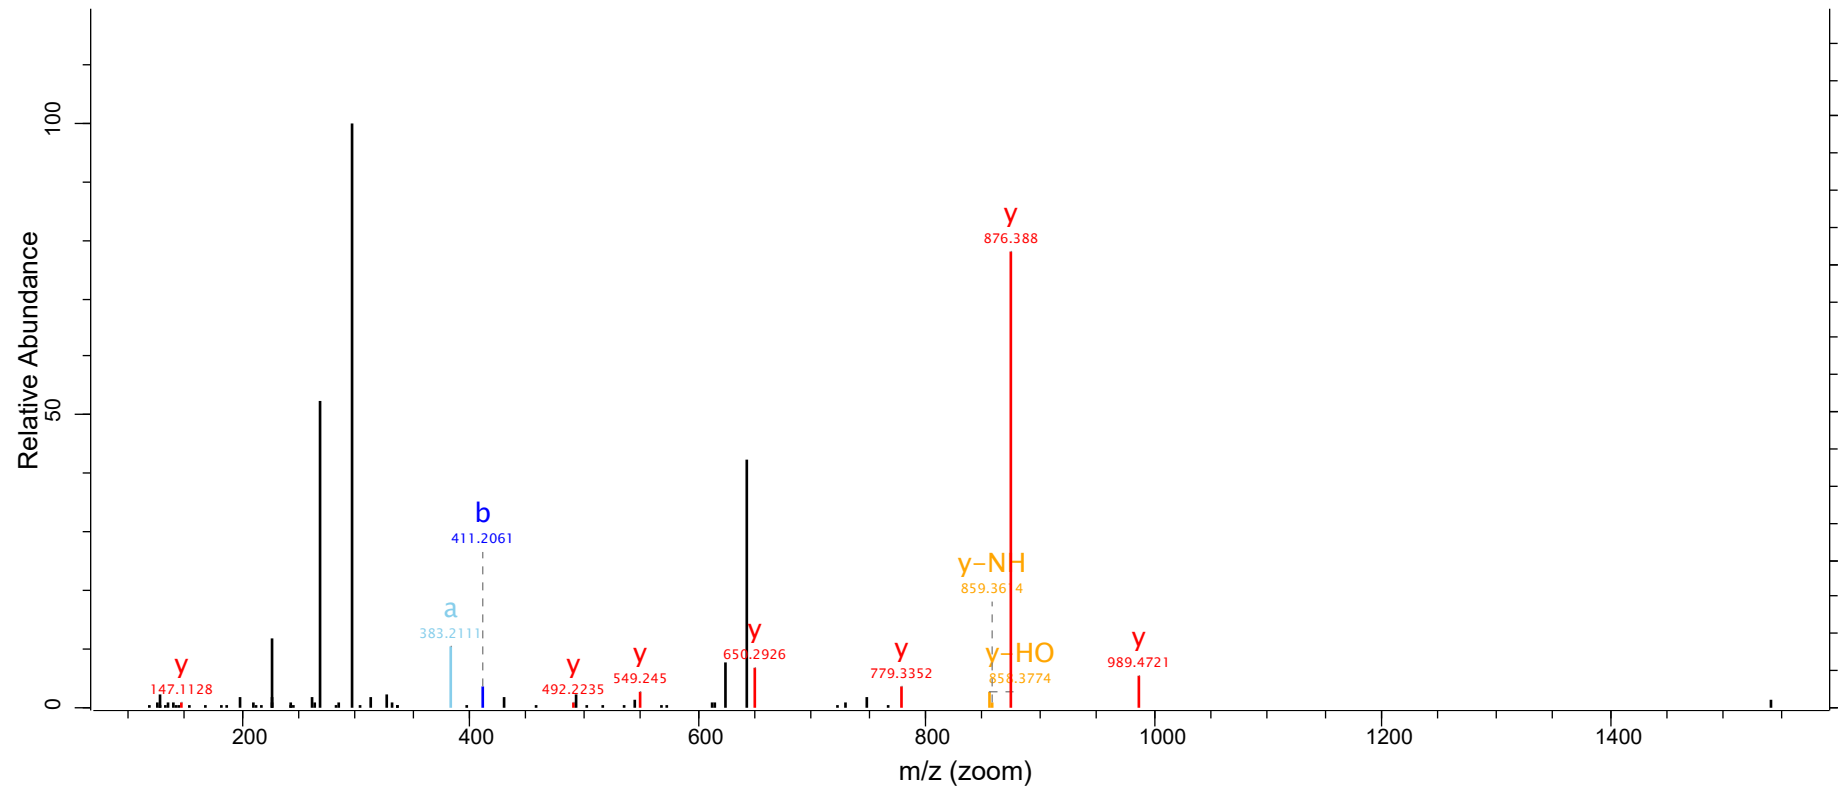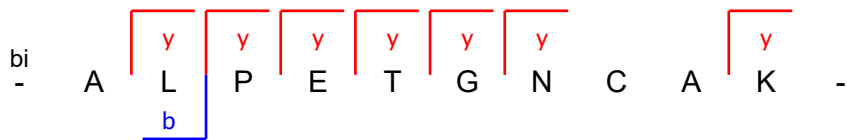



Raw File  
agg\_pep\_sort\_pos\_3

Scan  
16400

Method  
FTMS; HCD

Score  
94.3

m/z  
643.8

Gene names  
CABP2



Raw File  
agg\_pep\_sort\_pos\_3

Scan  
20007

Method  
FTMS; HCD

Score  
48.42

m/z  
779.87

Gene names  
CALU

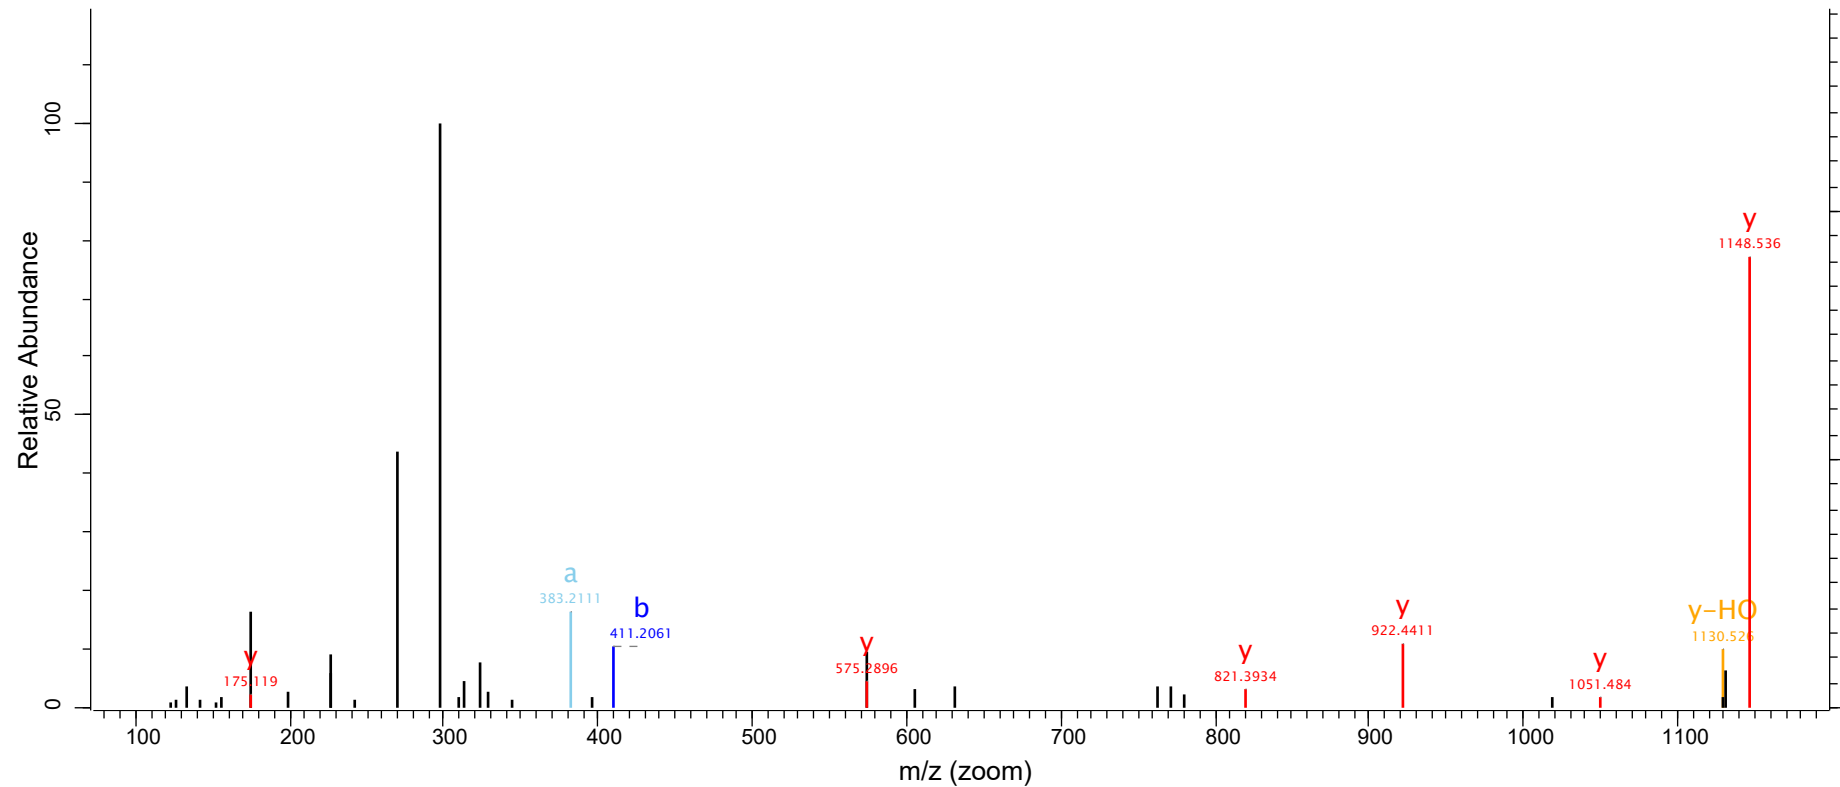

bi - A L P E T M V R D E R -

Fragmentation diagram showing b and y ions. A blue 'b' ion is shown below the L residue. Red 'y' ions are shown above the P, E, T, M, R, and the C-terminal dash (-) residues. Oxidation (ox) is indicated above the M residue.

Raw File  
agg\_pep\_sort\_pos\_2

Scan  
16537

Method  
FTMS; HCD

Score  
40.84

m/z  
773.06

Gene names  
CBR4

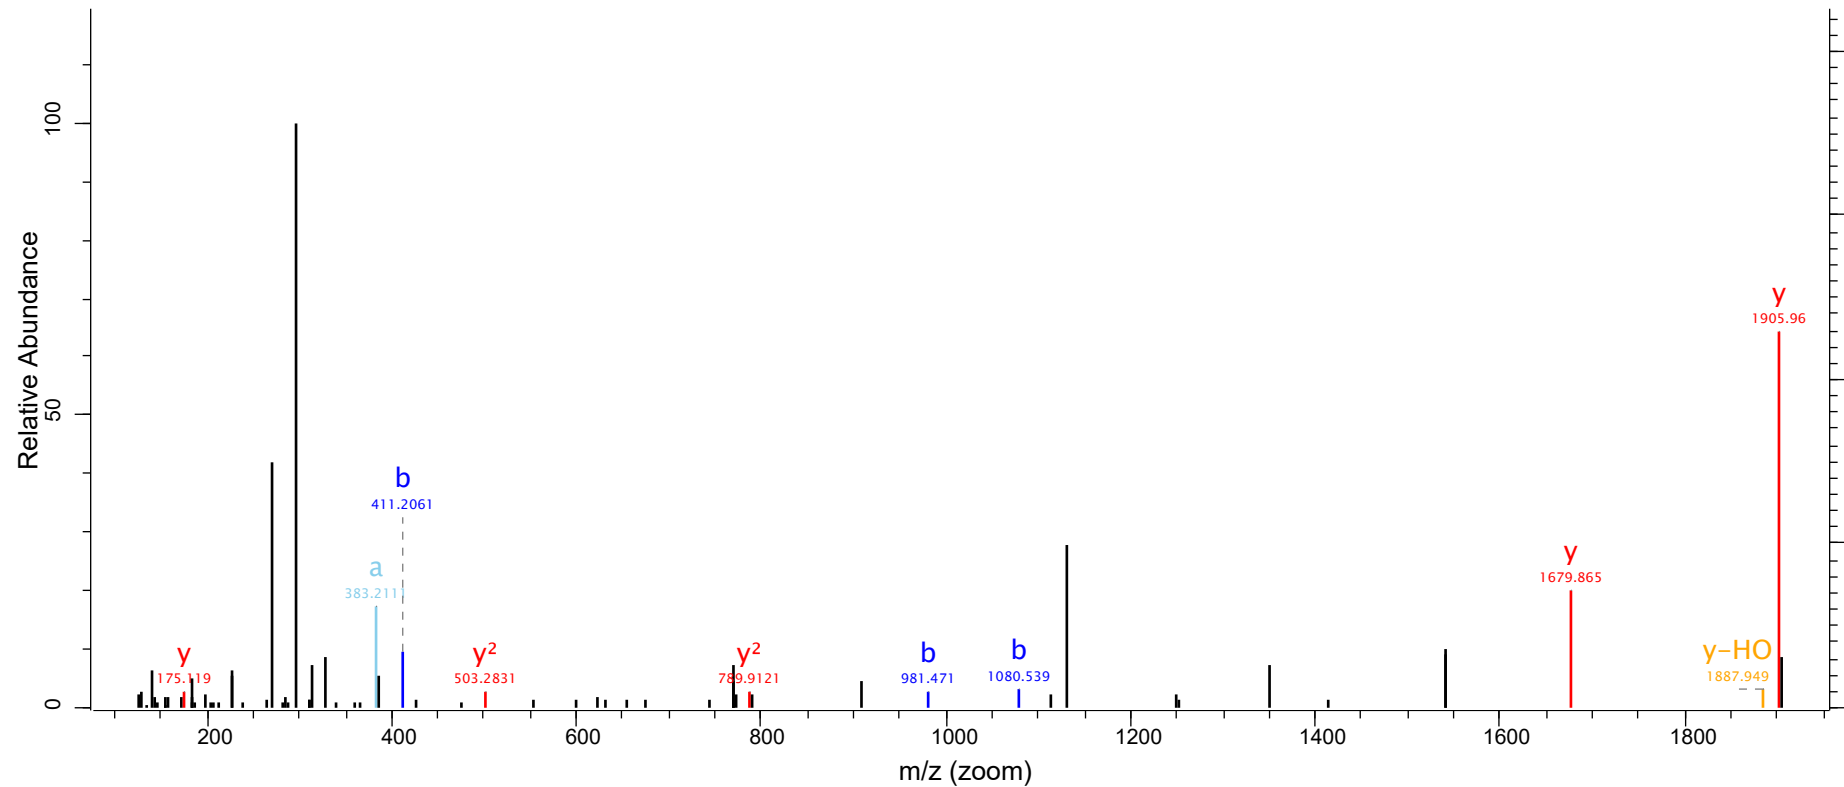

bi

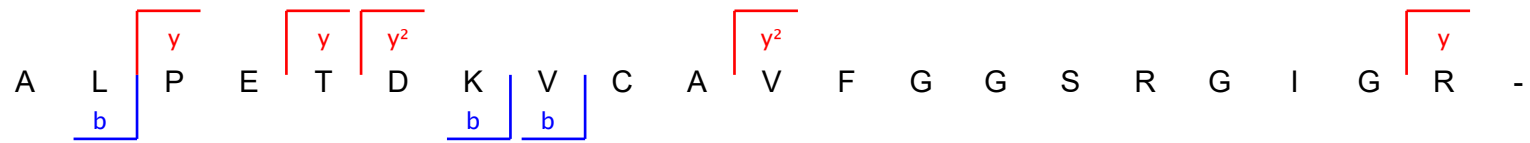

Raw File  
agg\_pep\_sort\_pos\_1

Scan  
14207

Method  
FTMS; HCD

Score  
67.99

m/z  
656.34

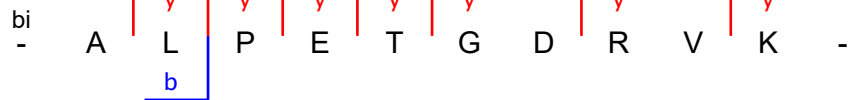

Raw File  
agg\_pep\_sort\_pos\_3

Scan  
18005

Method  
FTMS; HCD

Score  
49.93

m/z  
612.65

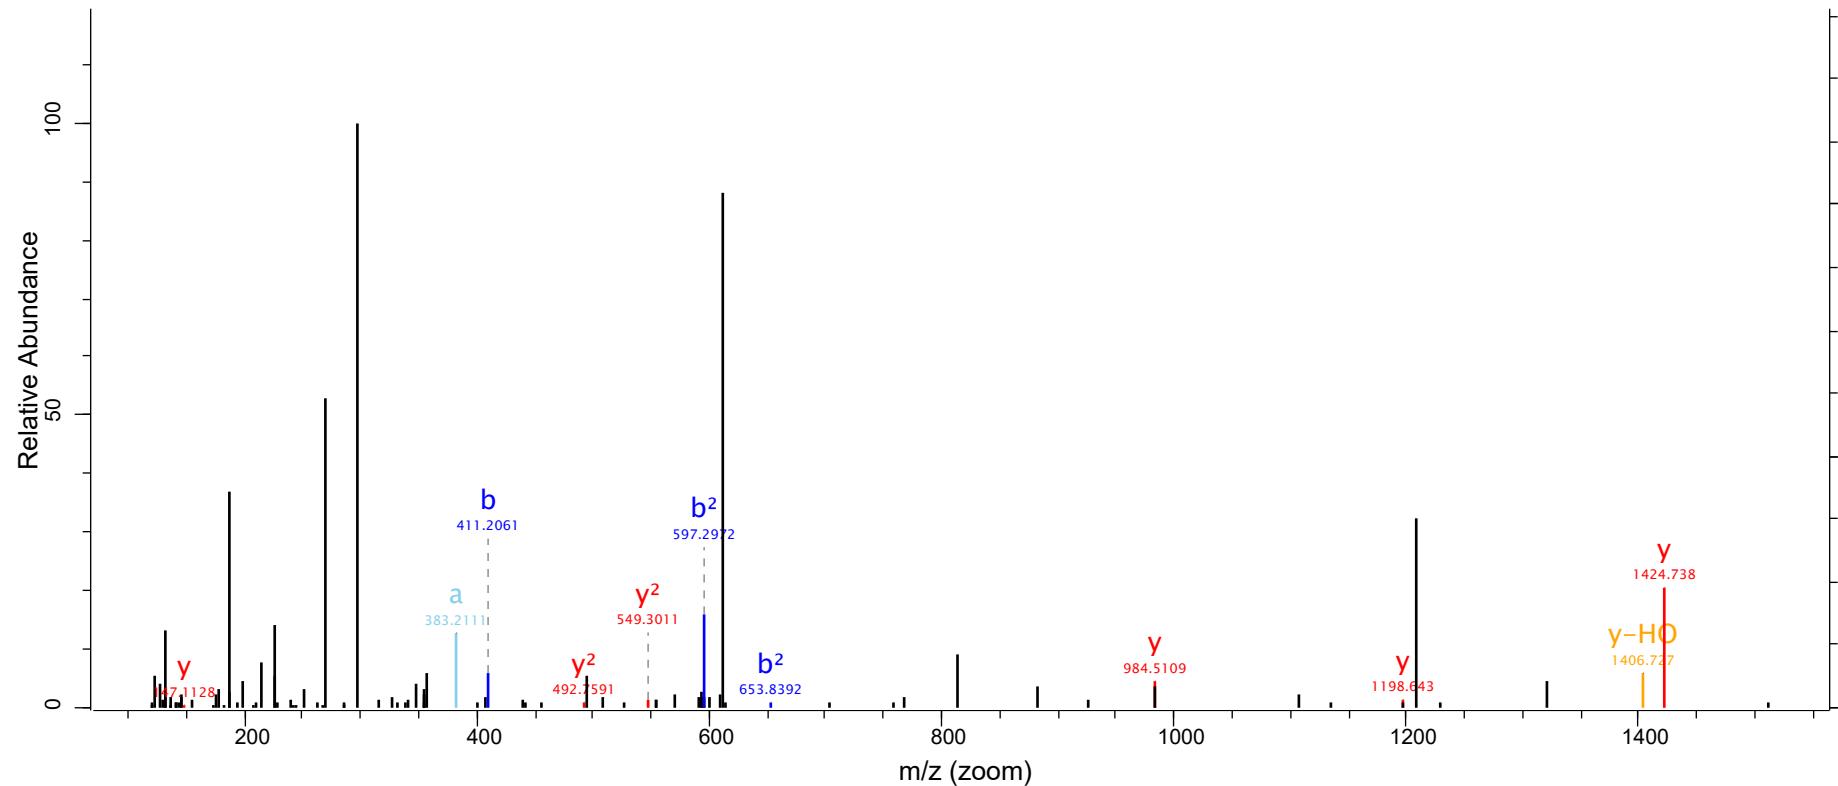

bi - A L P E T L E N V L A S H S K -

Fragmentation diagram showing the sequence A L P E T L E N V L A S H S K - with b and y ions indicated by brackets below the sequence.

- b ions (blue brackets): b (L), b² (V), b² (L)
- y ions (red brackets): y (P), y (T), y² (L), y (E), y (S)

Raw File  
agg\_pep\_sort\_pos\_3

Scan  
20012

Method  
FTMS; HCD

Score  
62.82

m/z  
771.87

Gene names  
CDK15

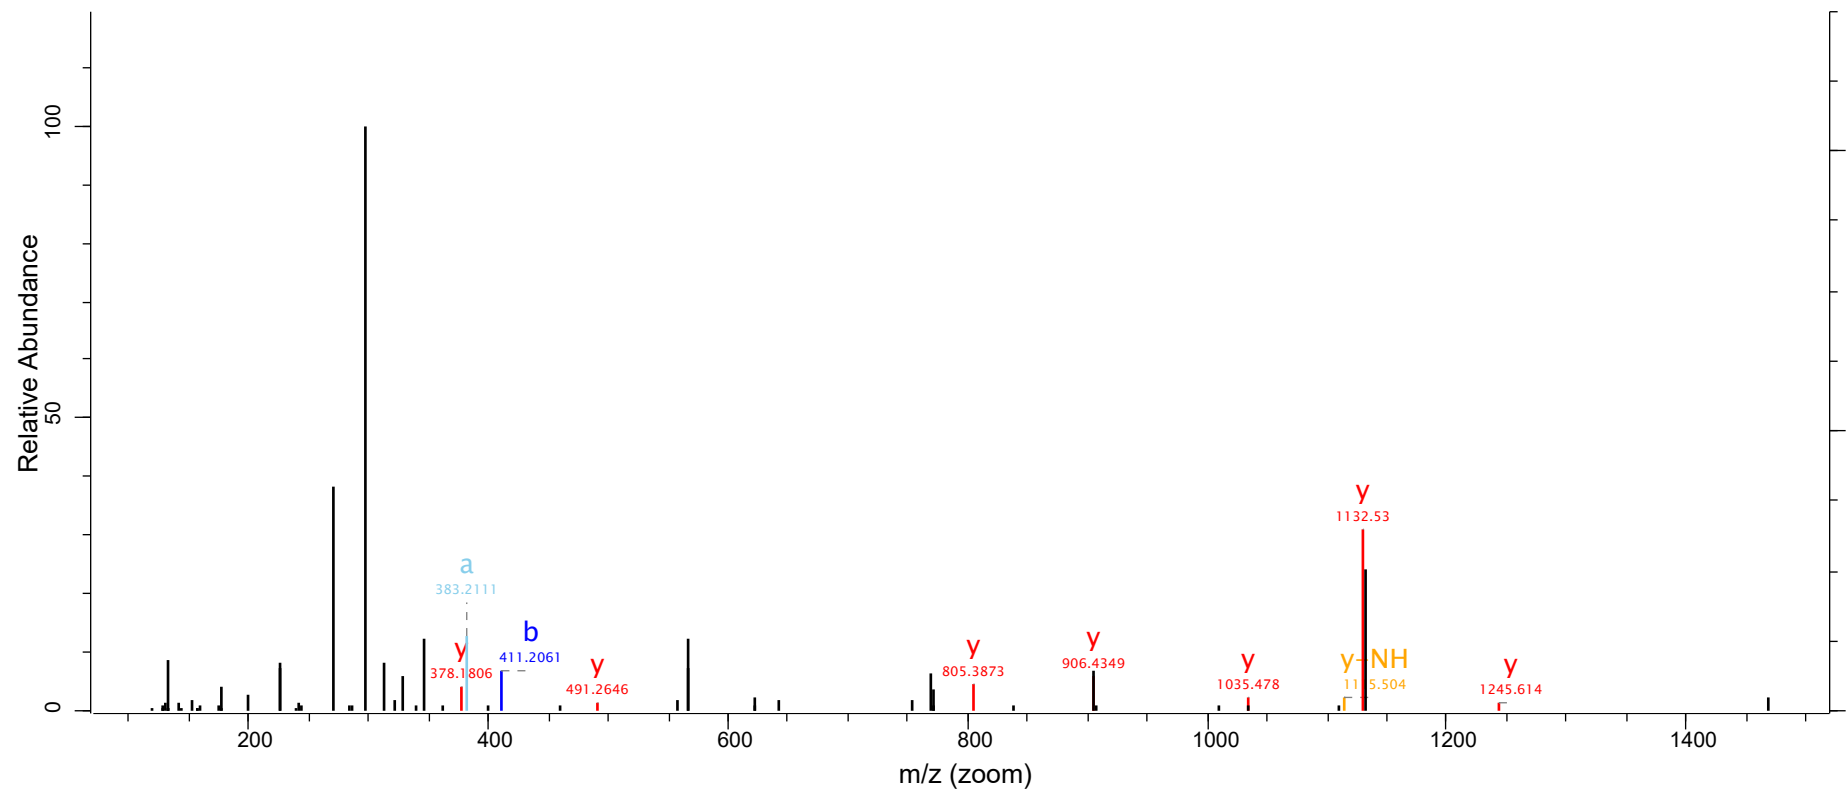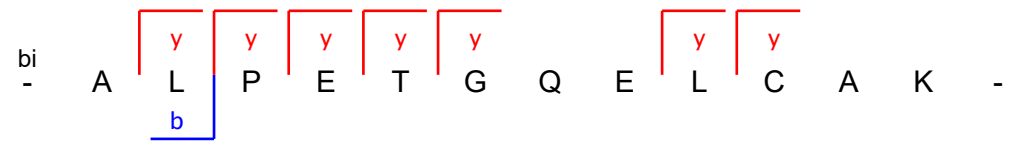

Raw File  
agg\_pep\_sort\_pos\_1

Scan  
17383

Method  
FTMS; HCD

Score  
76.46

m/z  
708.84

Gene names  
CHCHD3

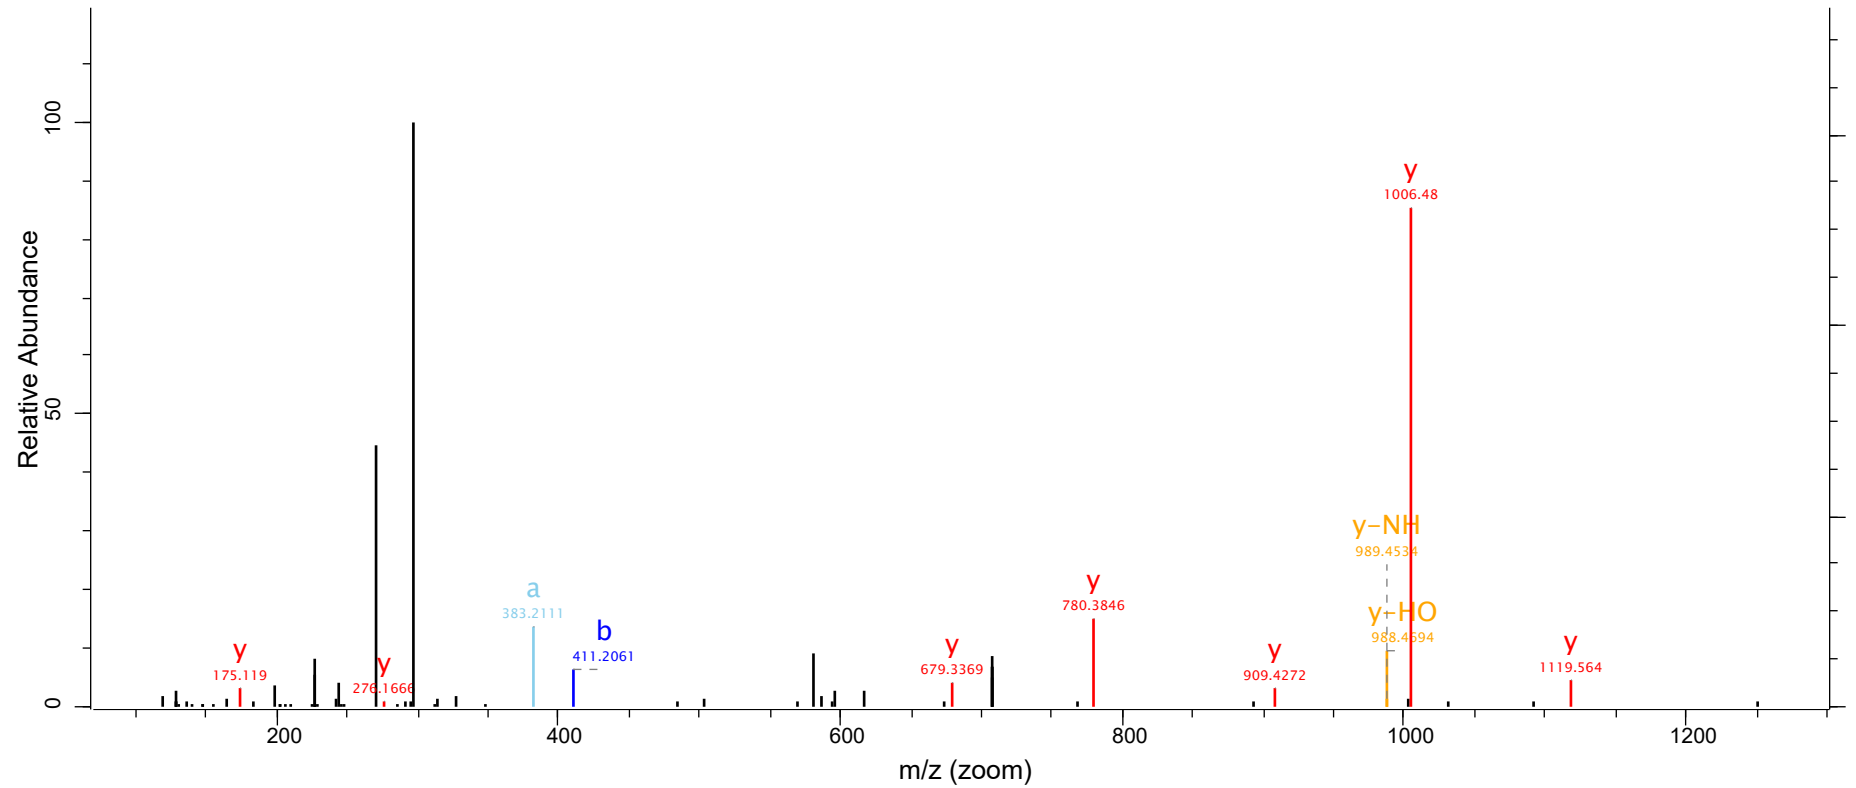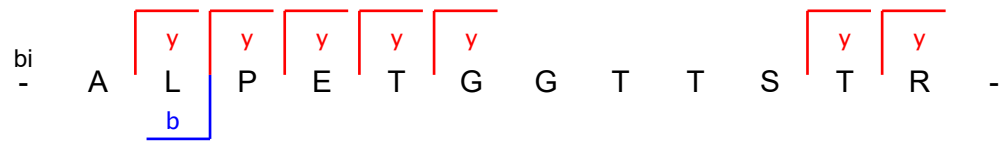

Raw File  
agg\_pep\_sort\_pos\_1

Scan  
26620

Method  
FTMS; HCD

Score  
101.54

m/z  
629.83

Gene names  
CHMP3

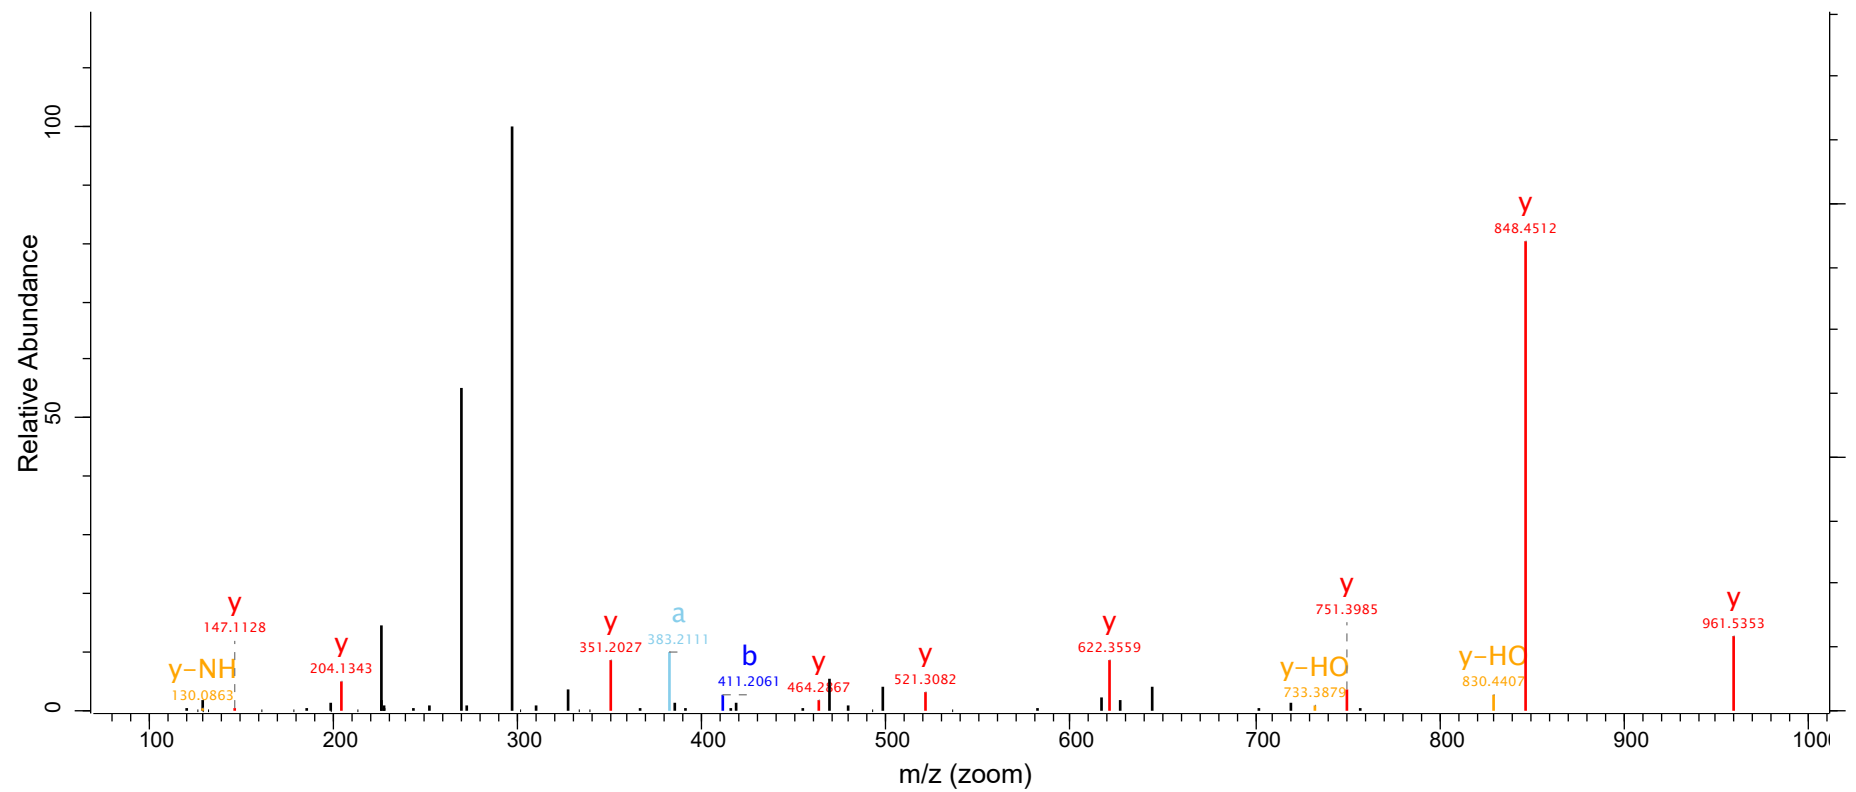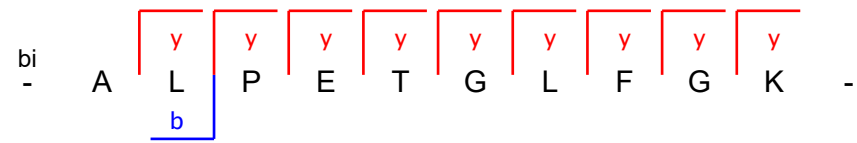



Raw File  
agg\_pep\_sort\_pos\_1

Scan  
26498

Method  
FTMS; HCD

Score  
130.75

m/z  
700.85

Gene names  
CHMP6

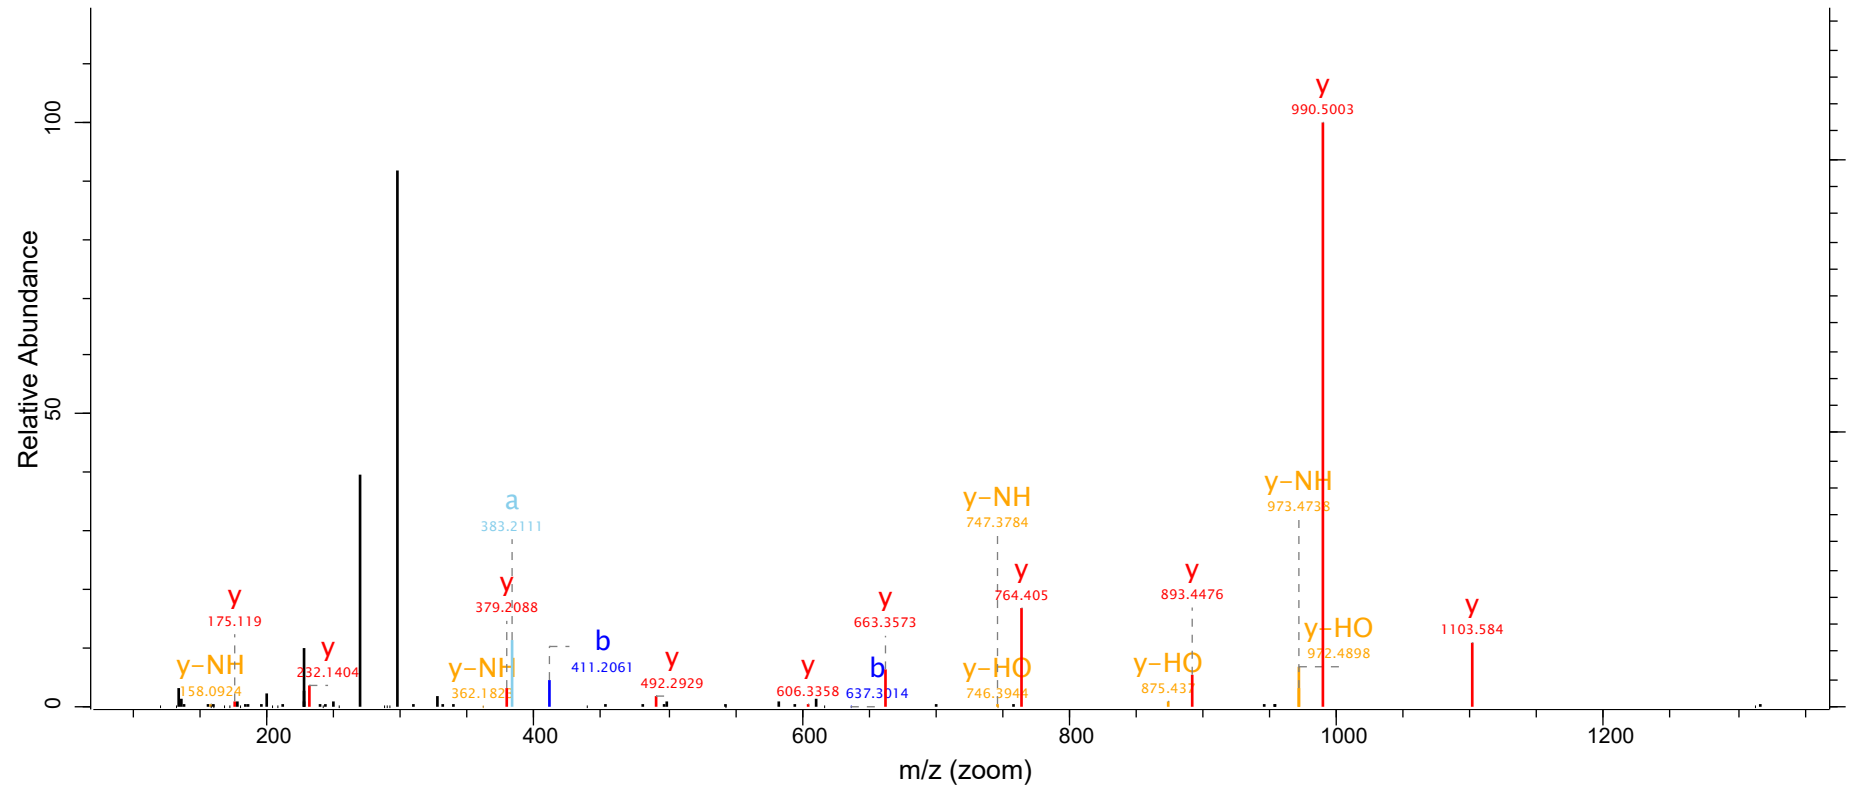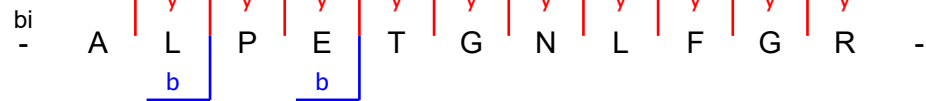

Raw File  
agg\_pep\_sort\_pos\_2

Scan  
25802

Method  
FTMS; HCD

Score  
117.65

m/z  
790.06

Gene names  
CKAP5

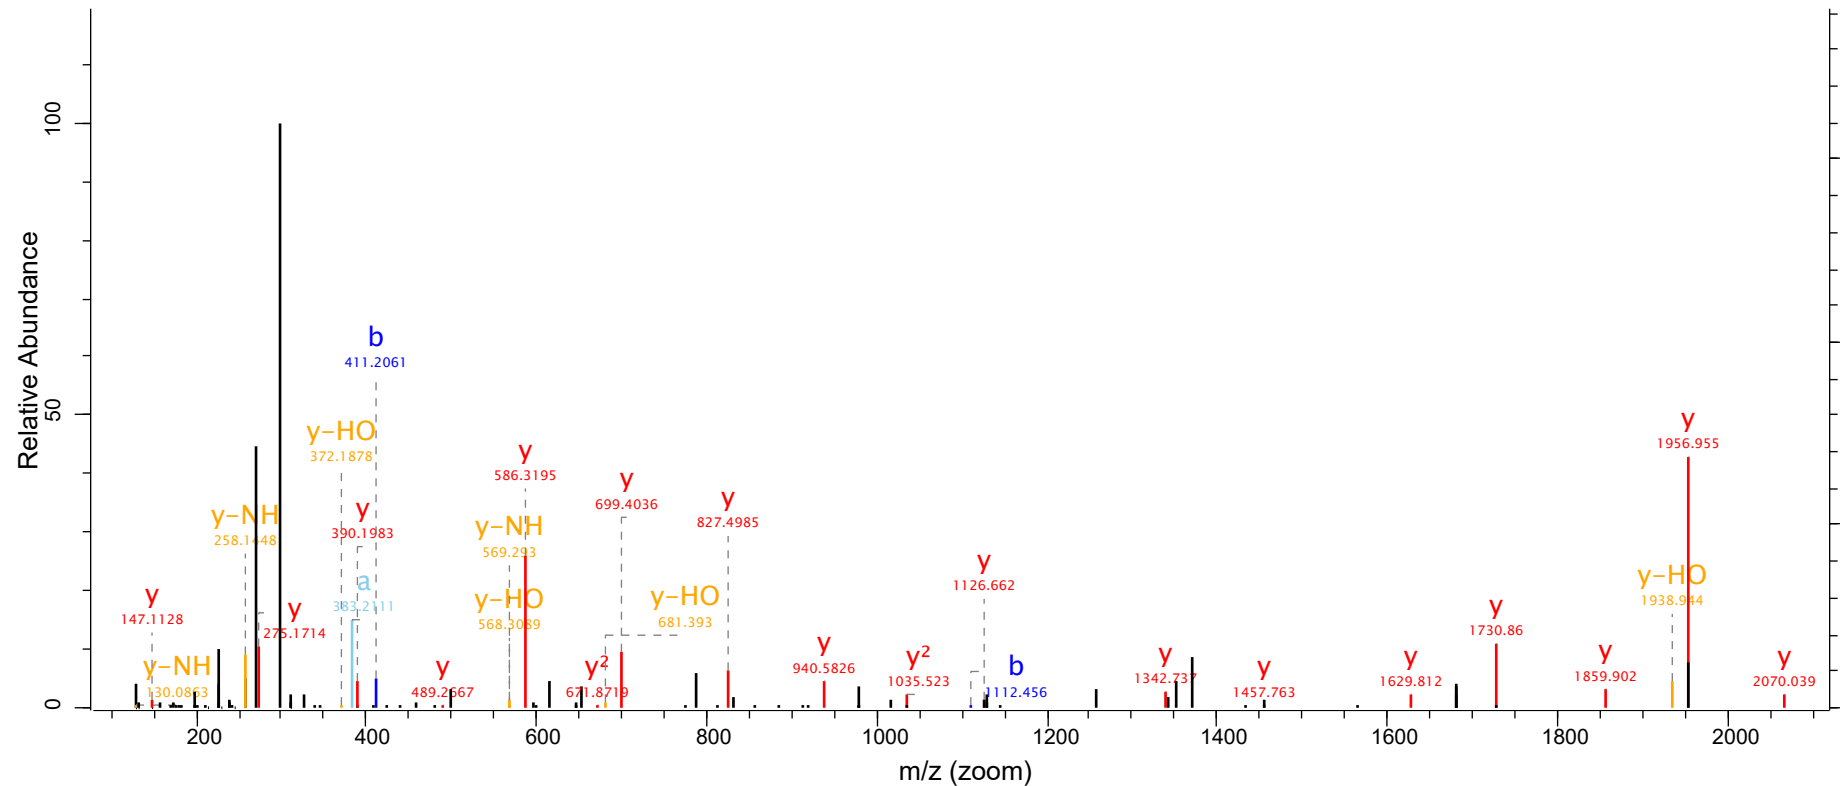

bi

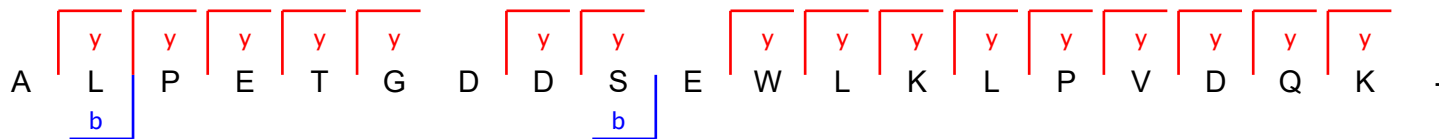

Raw File  
agg\_pep\_sort\_pos\_2

Scan  
15944

Method  
FTMS; HCD

Score  
75.65

m/z  
815.12

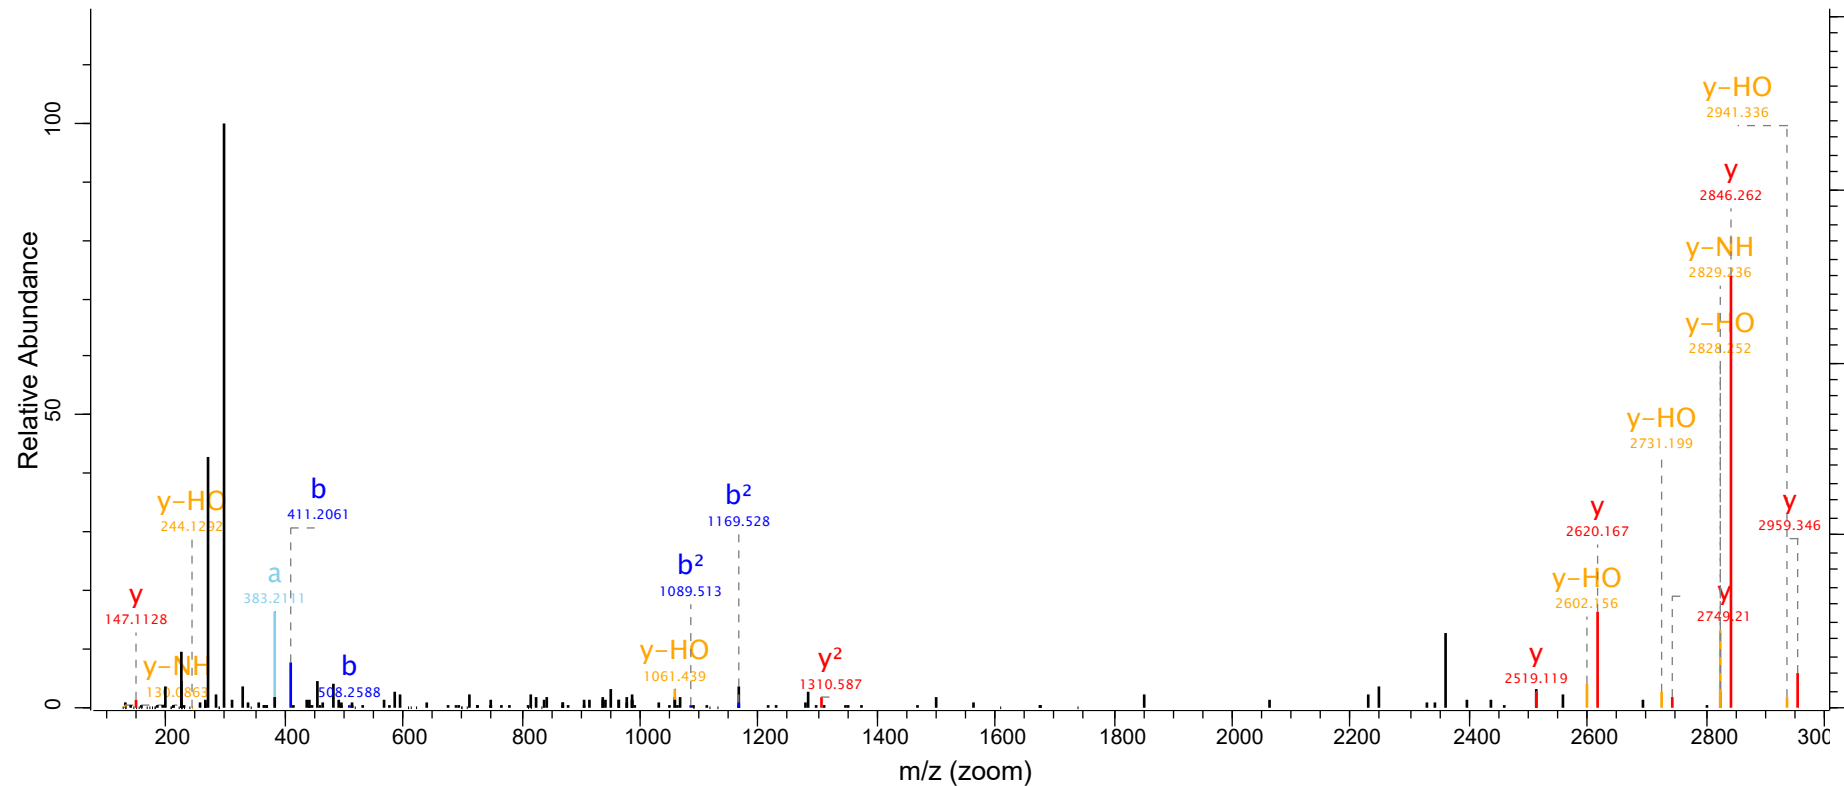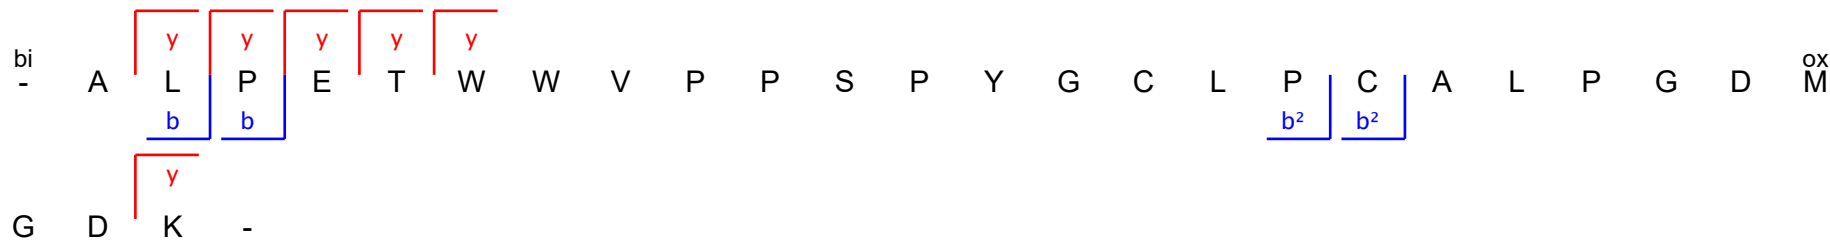

Raw File  
agg\_pep\_sort\_pos\_2

Scan  
12993

Method  
FTMS; HCD

Score  
77.38

m/z  
785.88

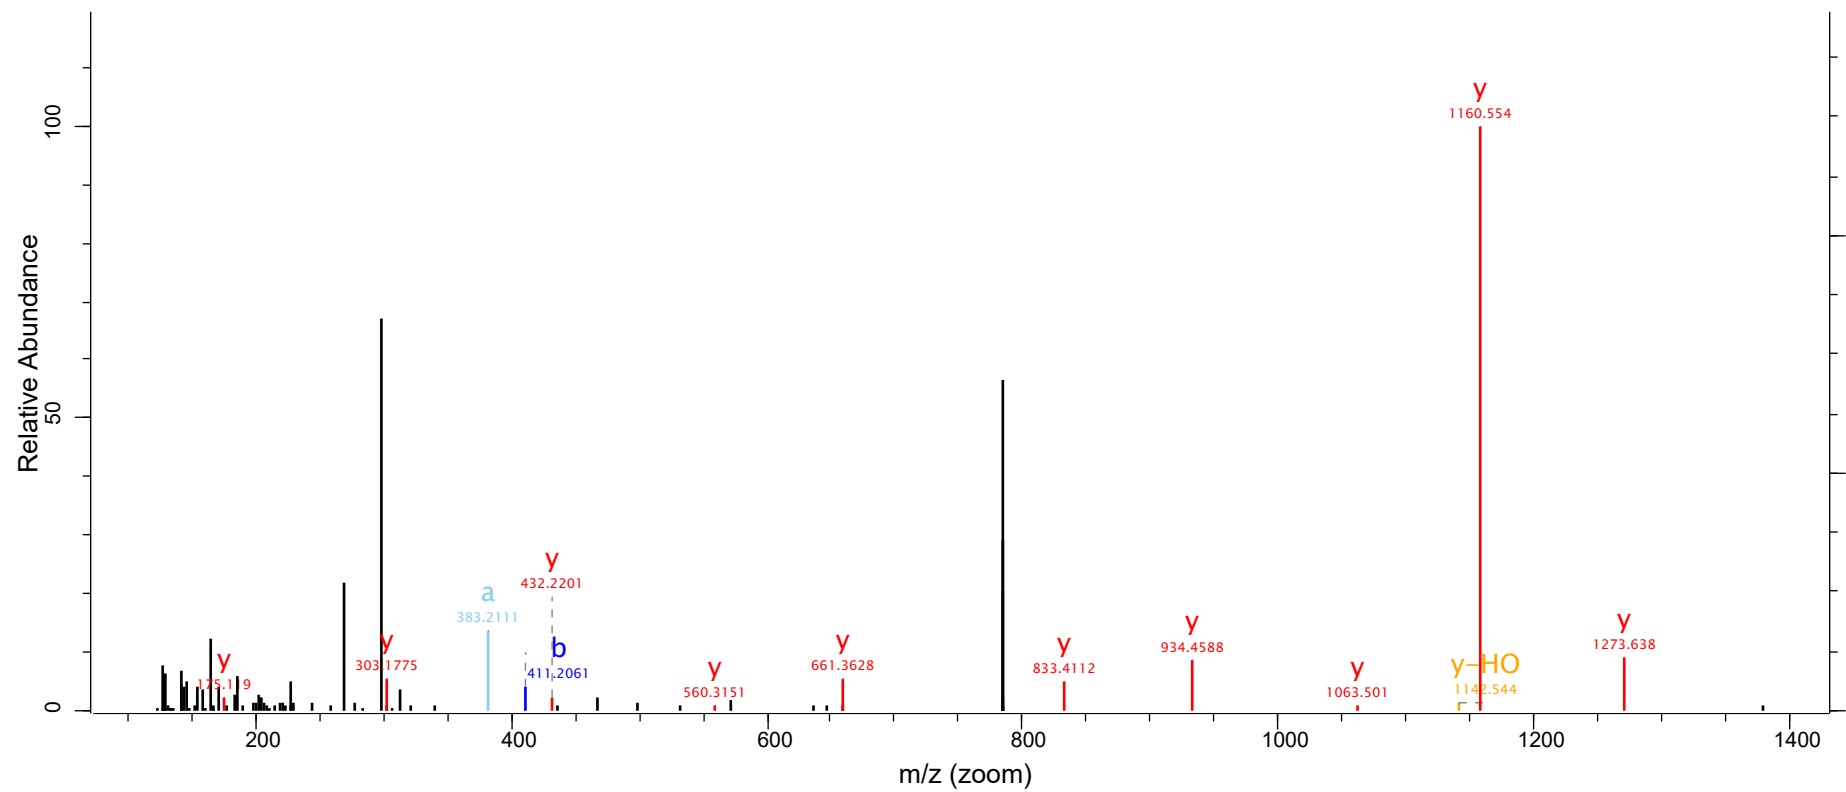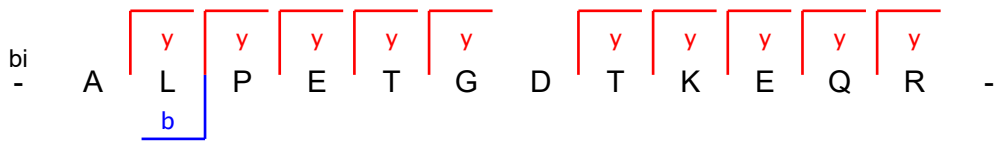

Raw File  
agg\_pep\_sort\_pos\_1

Scan  
10383

Method  
FTMS; HCD

Score  
46.32

m/z  
448.48

Gene names  
DDAH1

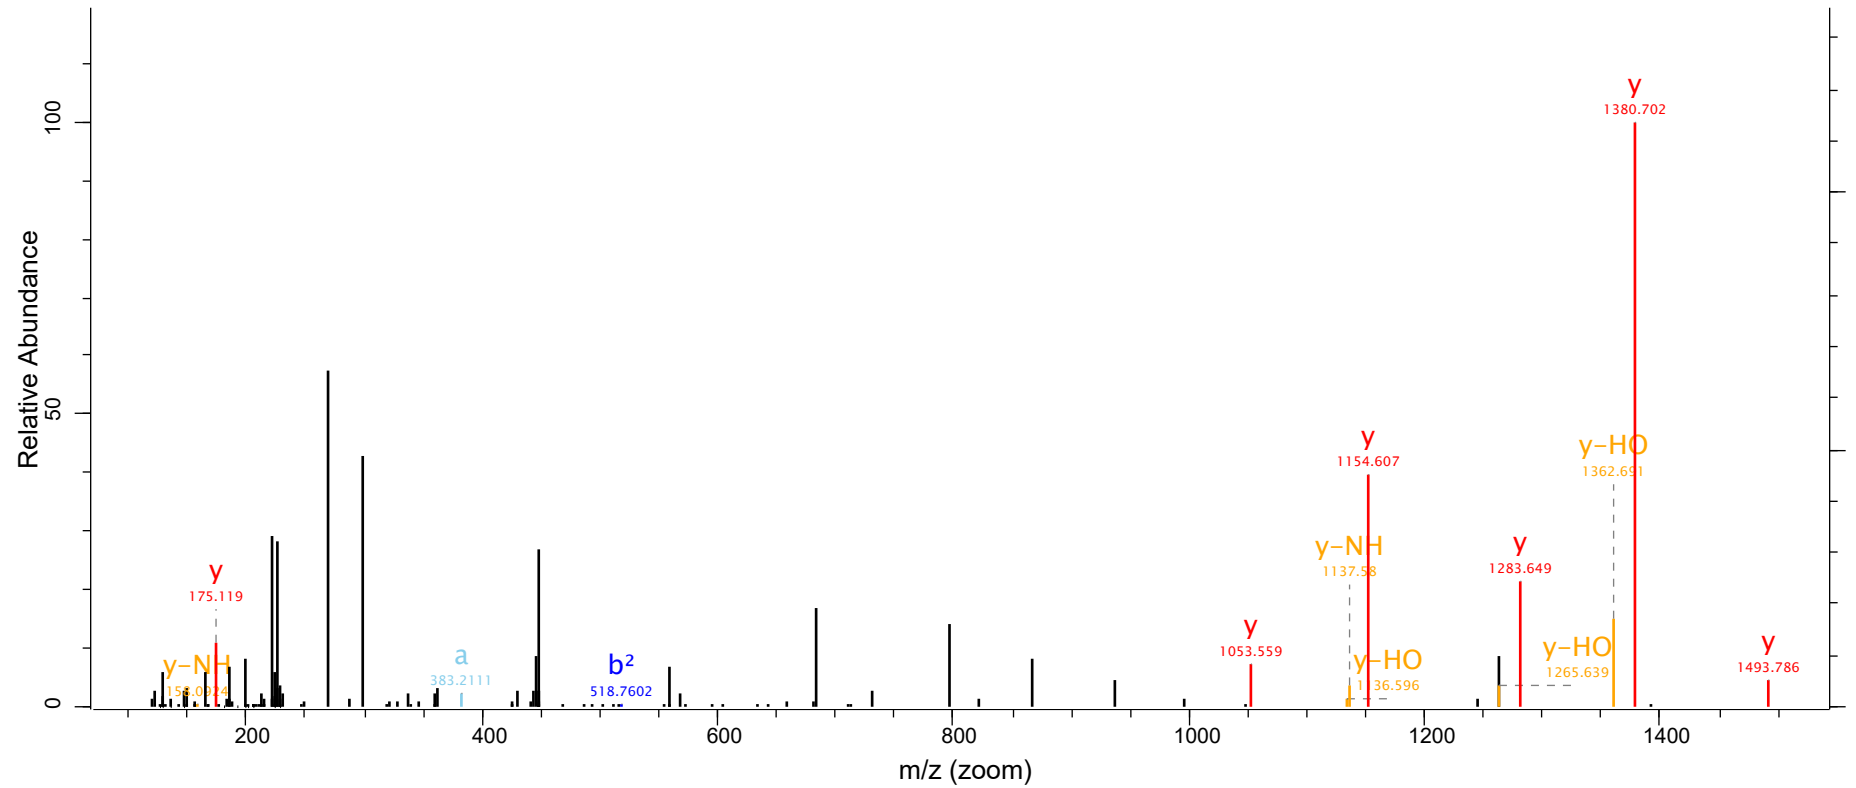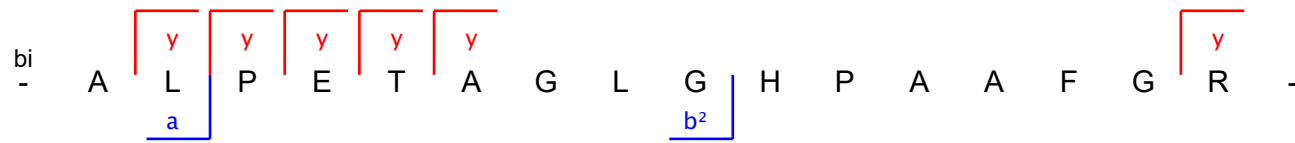

Raw File  
agg\_pep\_sort\_pos\_1

Scan  
15482

Method  
FTMS; HCD

Score  
115.46

m/z  
798.71

Gene names  
DNMT1P1

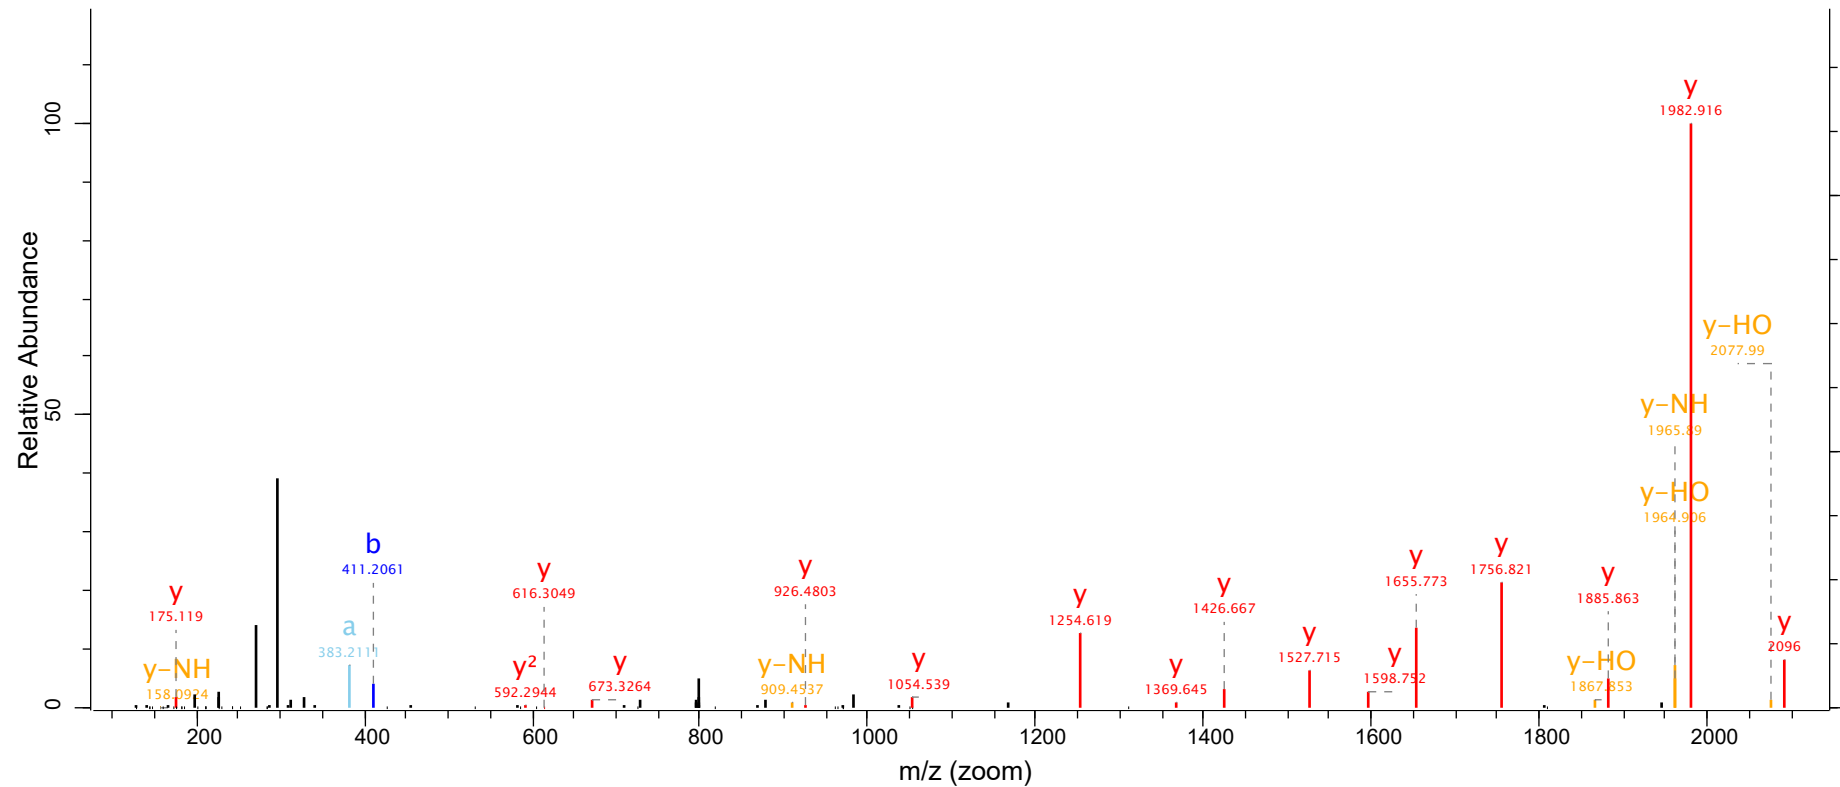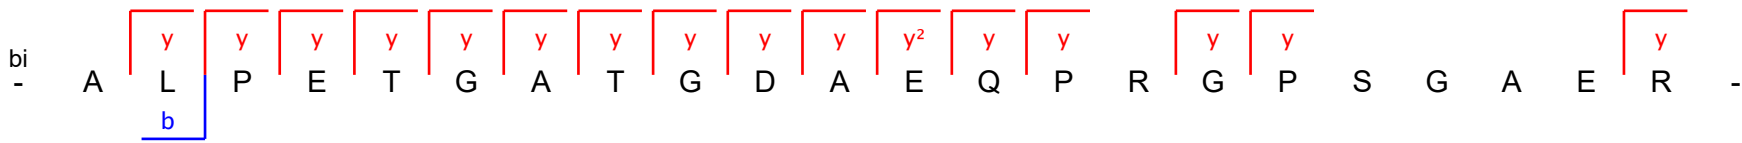

Raw File  
agg\_pep\_sort\_pos\_1

Scan  
18883

Method  
FTMS; HCD

Score  
82.17

m/z  
870.41

Gene names  
DNTTIP1

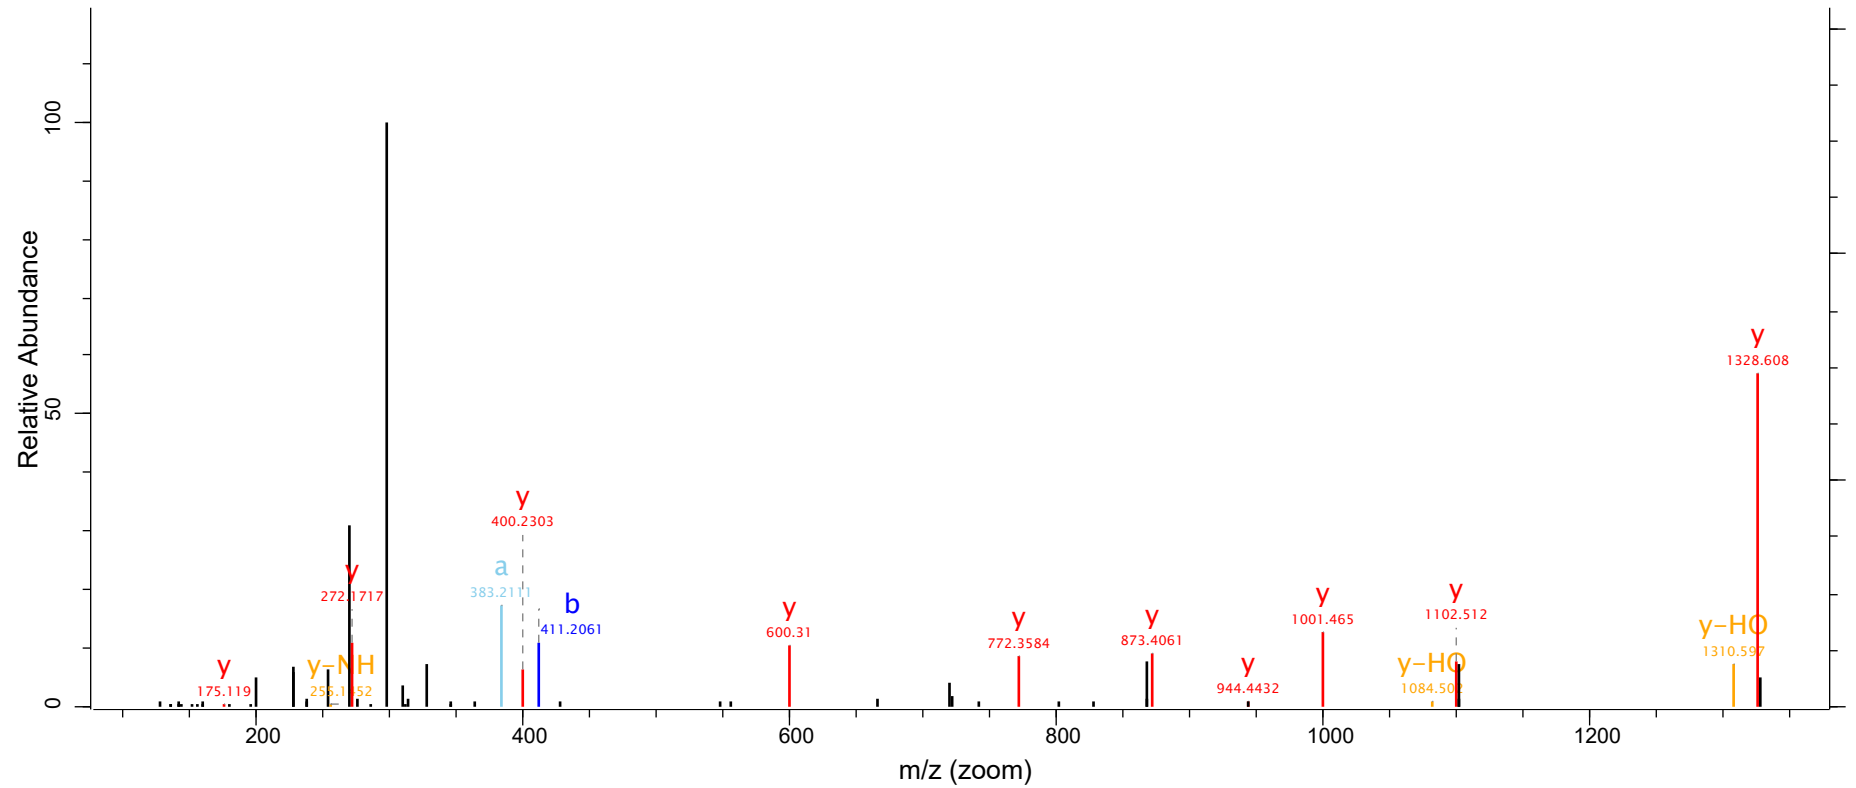

bi

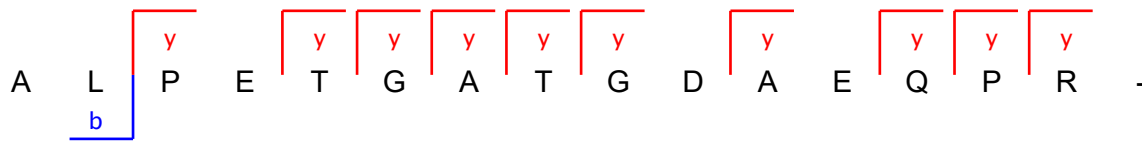

Raw File  
agg\_pep\_sort\_pos\_2

Scan  
17592

Method  
FTMS; HCD

Score  
67.9

m/z  
648.32

Gene names  
DPEP3

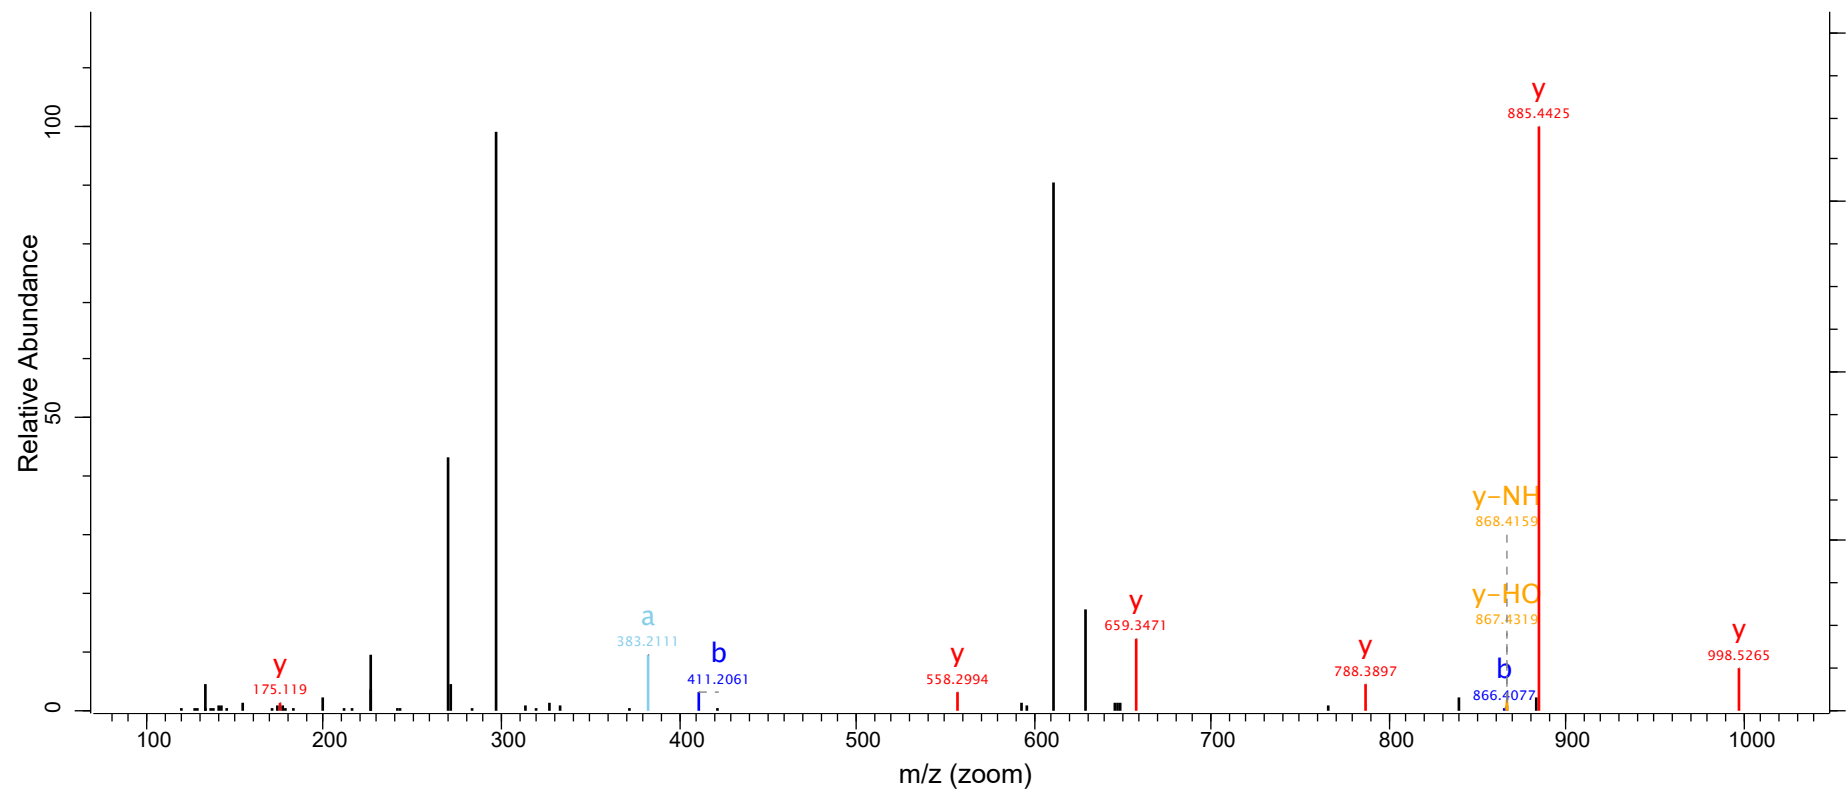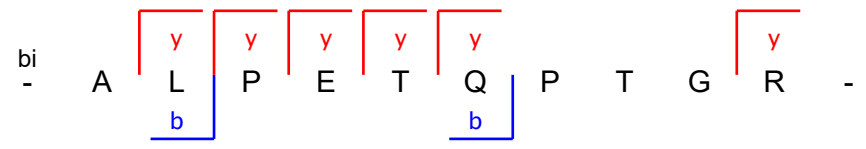



Raw File  
agg\_pep\_sort\_pos\_2

Scan  
25042

Method  
FTMS; HCD

Score  
94.69

m/z  
687.84

Gene names  
EEF1B2

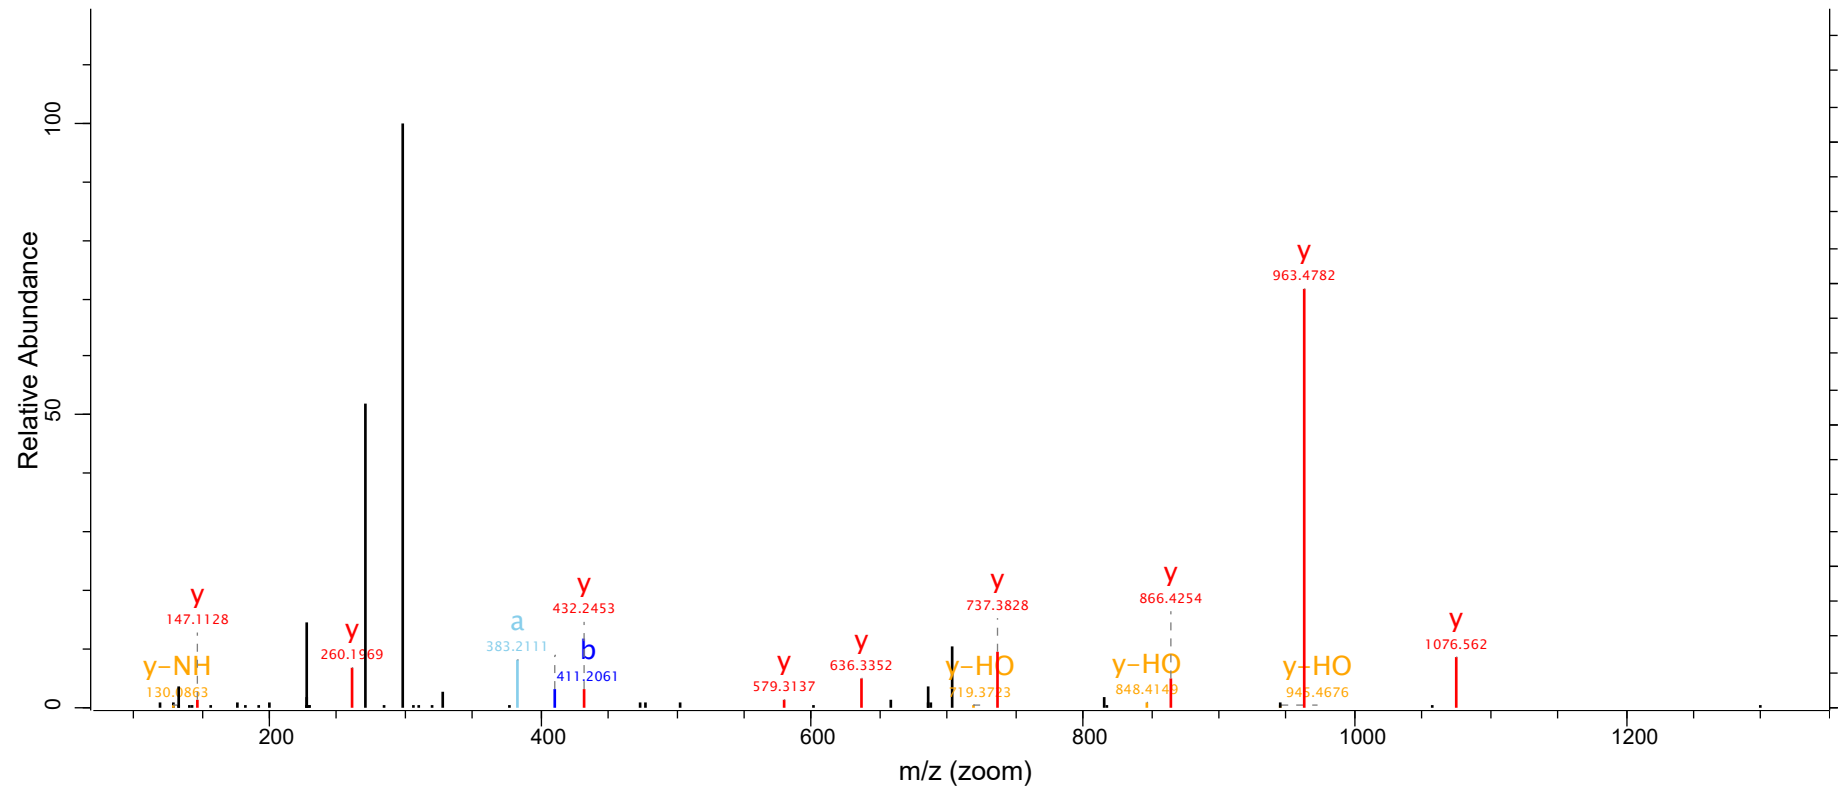

bi

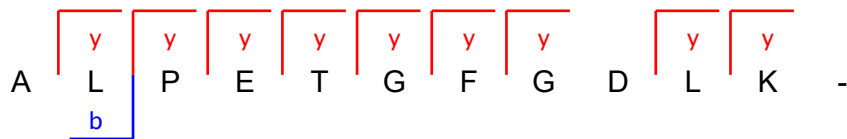

Raw File  
agg\_pep\_sort\_pos\_1

Scan  
17488

Method  
FTMS; HCD

Score  
55.55

m/z  
781.43

Gene names  
EZR;RDX

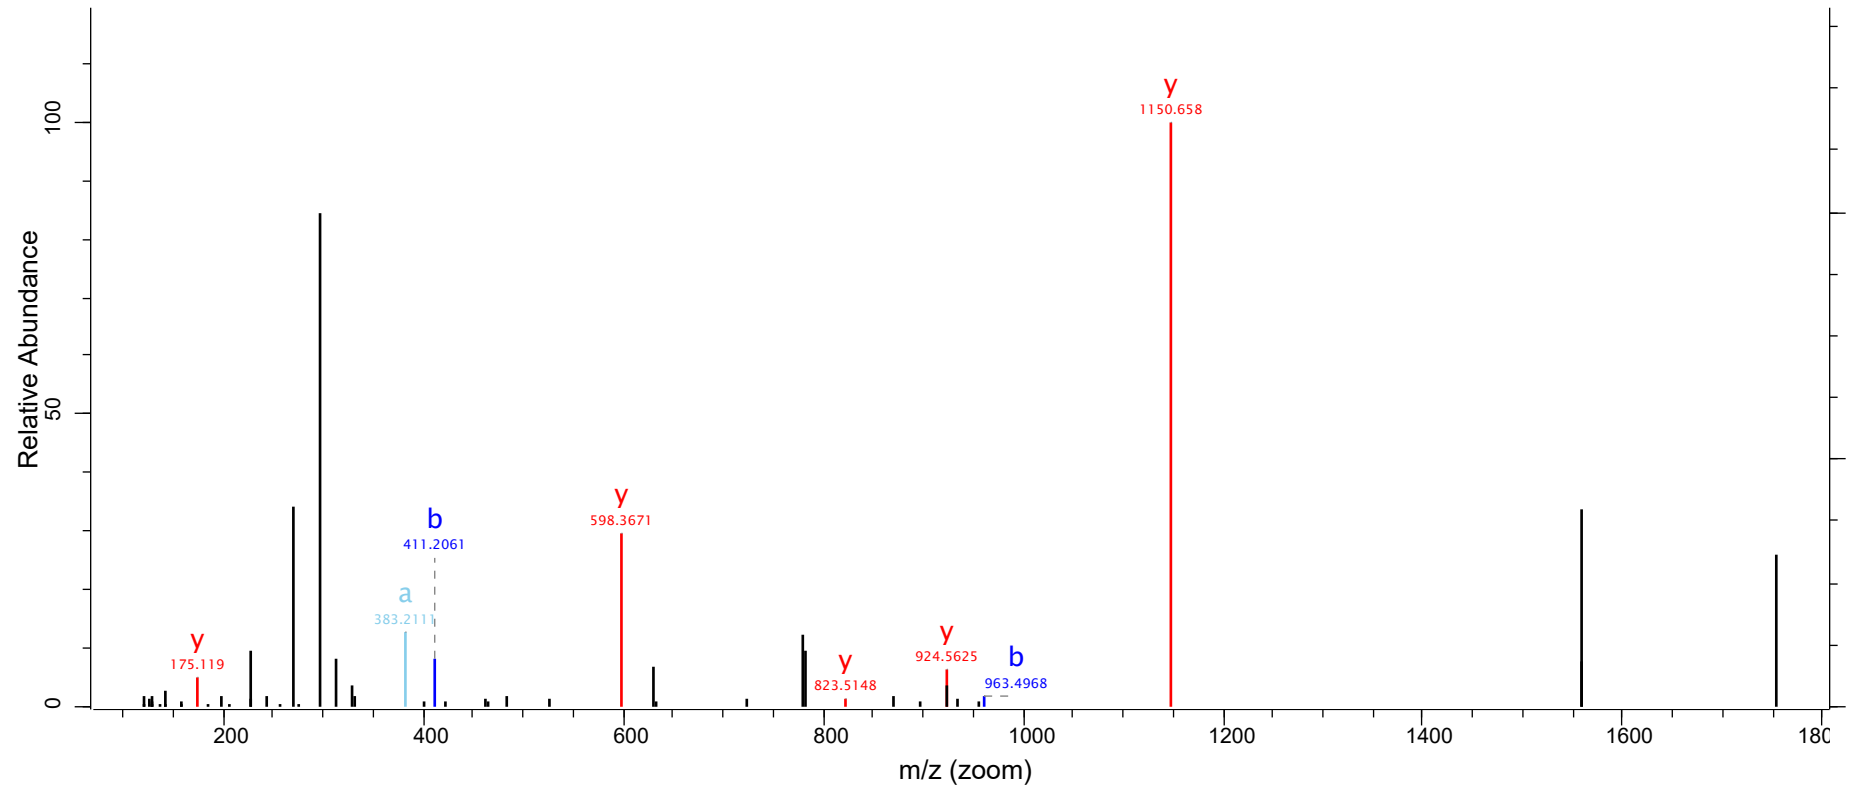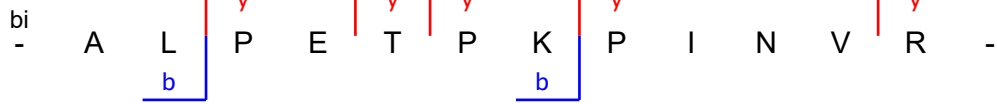

Raw File  
agg\_pep\_sort\_pos\_3

Scan  
18442

Method  
FTMS; HCD

Score  
77.68

m/z  
846.4

Gene names  
FAM129A

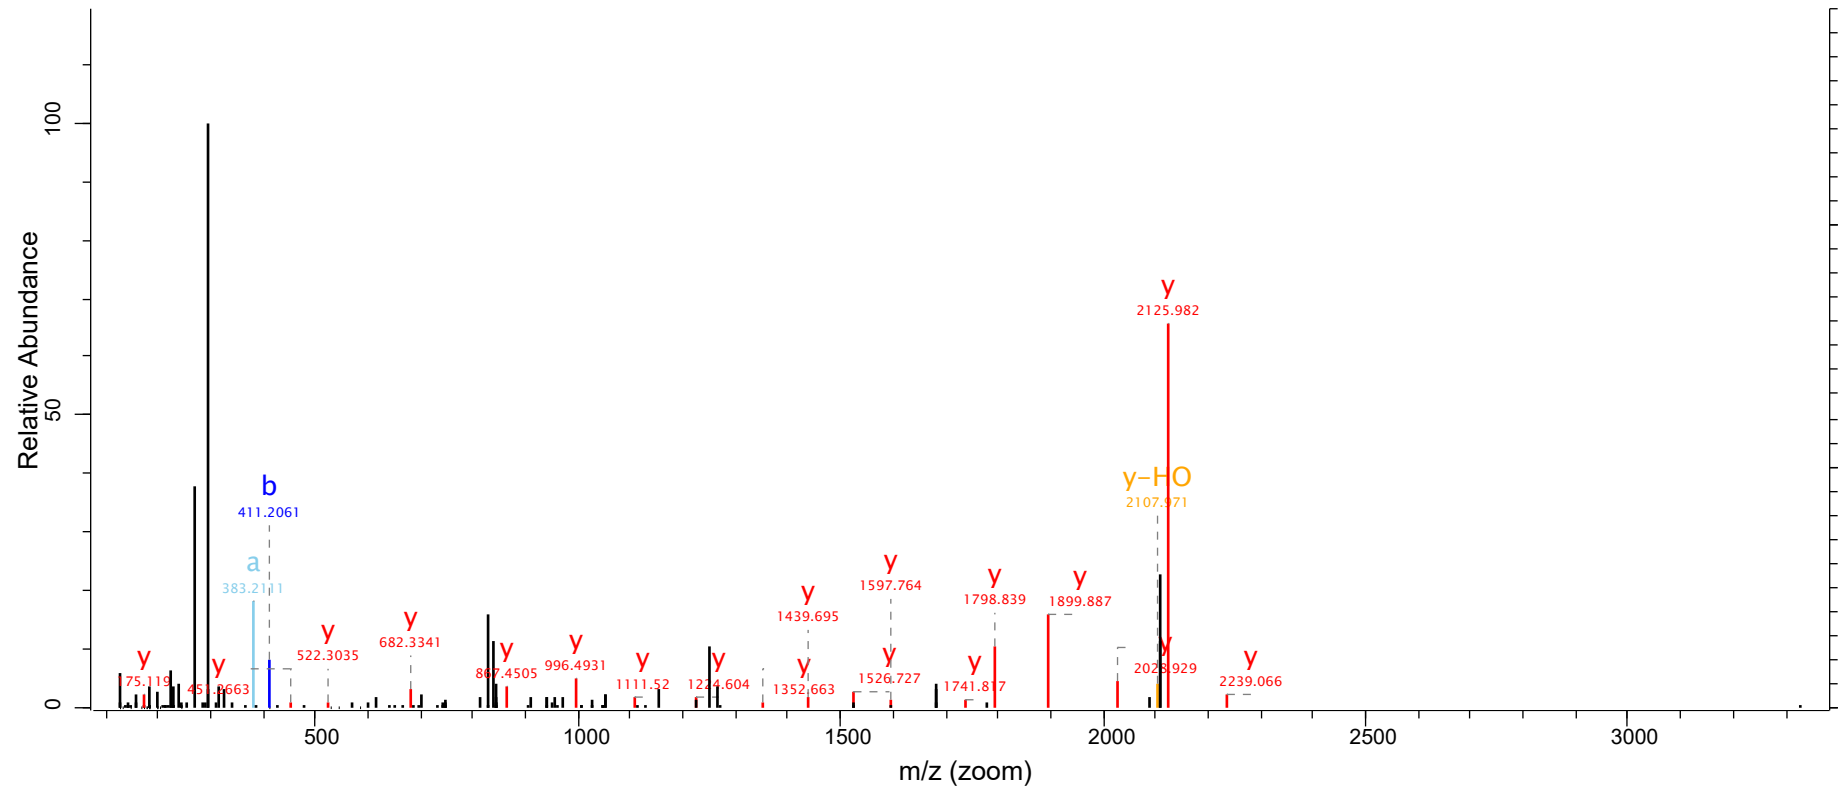

bi

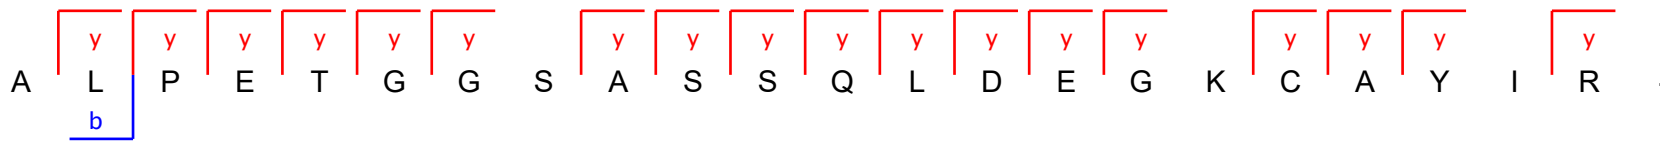

Raw File  
agg\_pep\_sort\_pos\_1

Scan  
19601

Method  
FTMS; HCD

Score  
143.86

m/z  
936.94

Gene names  
FAM129A

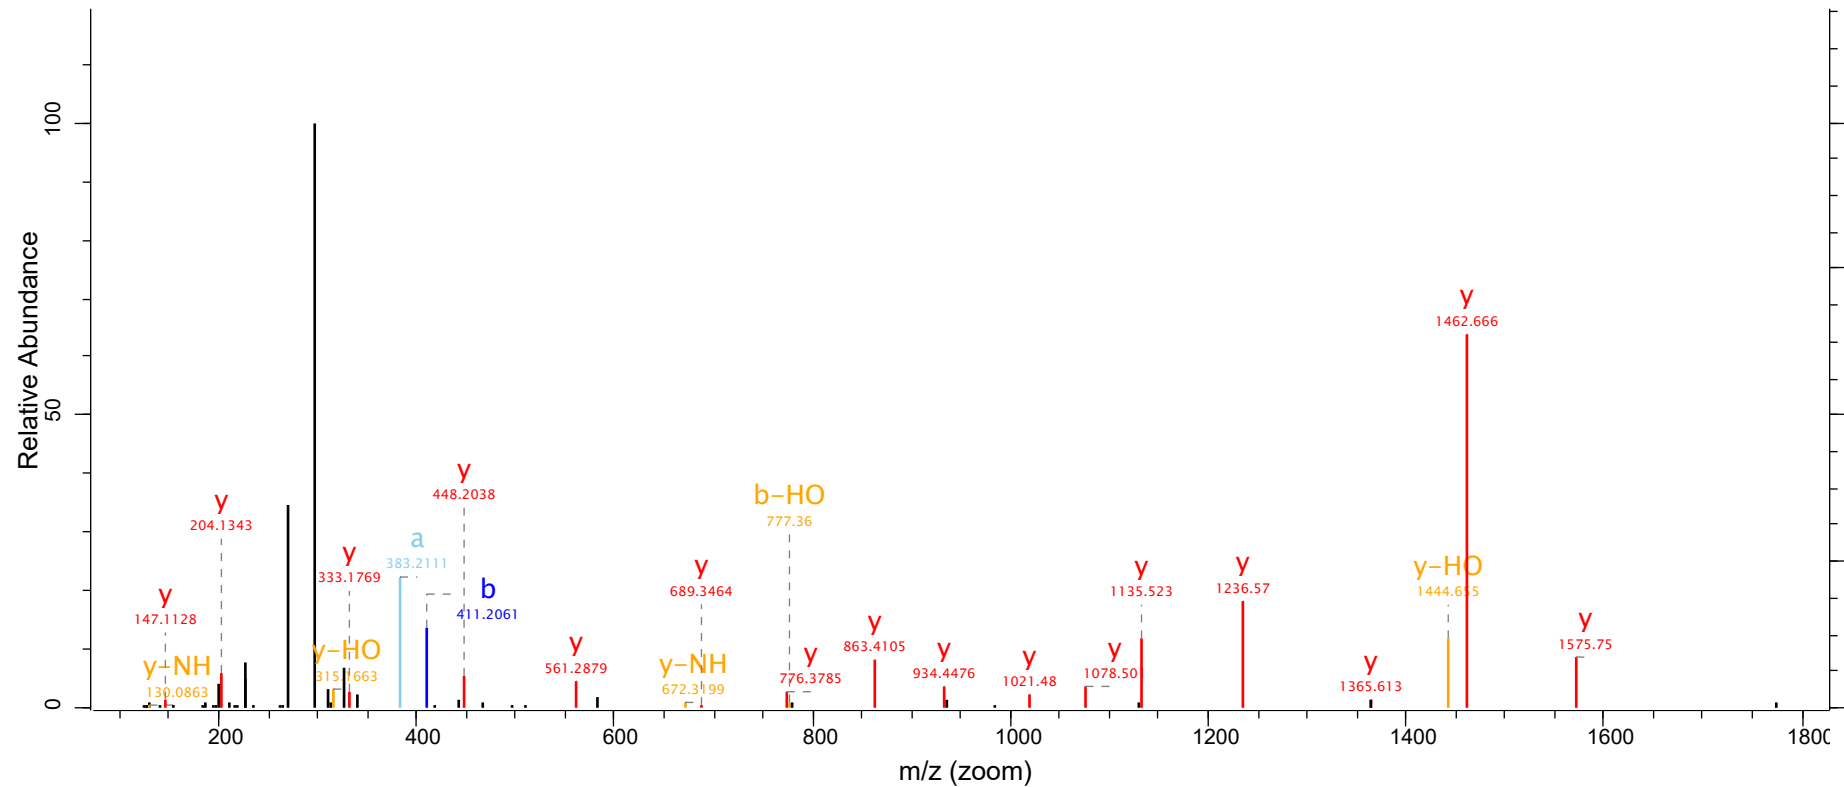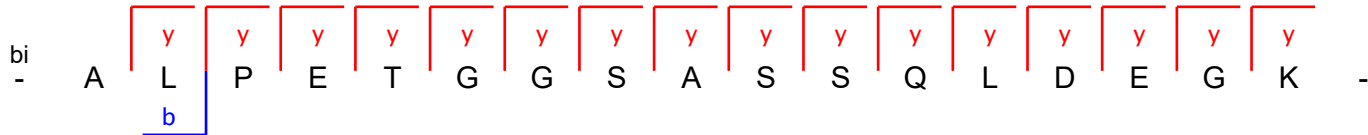

Raw File  
agg\_pep\_sort\_pos\_3

Scan  
21095

Method  
FTMS; HCD

Score  
80.24

m/z  
685.33

Gene names  
FAM216B

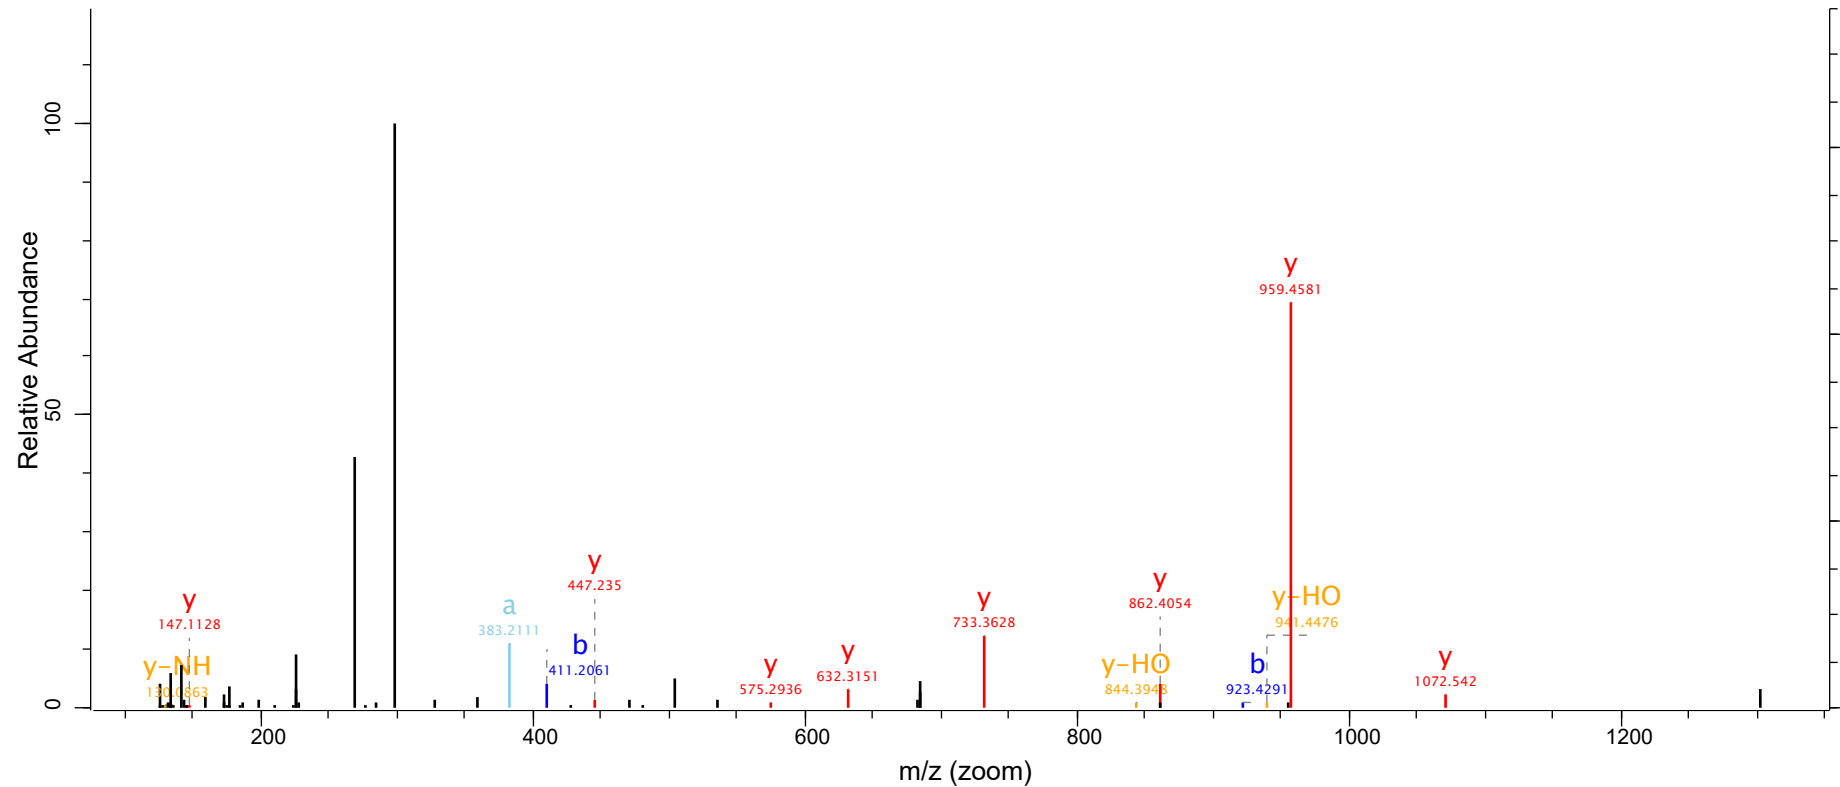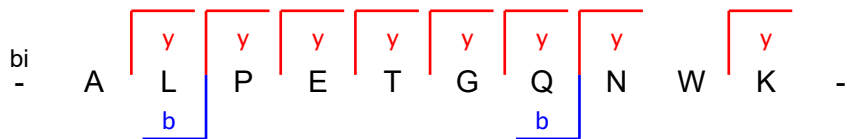

Raw File  
agg\_pep\_sort\_pos\_2

Scan  
23260

Method  
FTMS; HCD

Score  
122.13

m/z  
712.88

Gene names  
FEN1

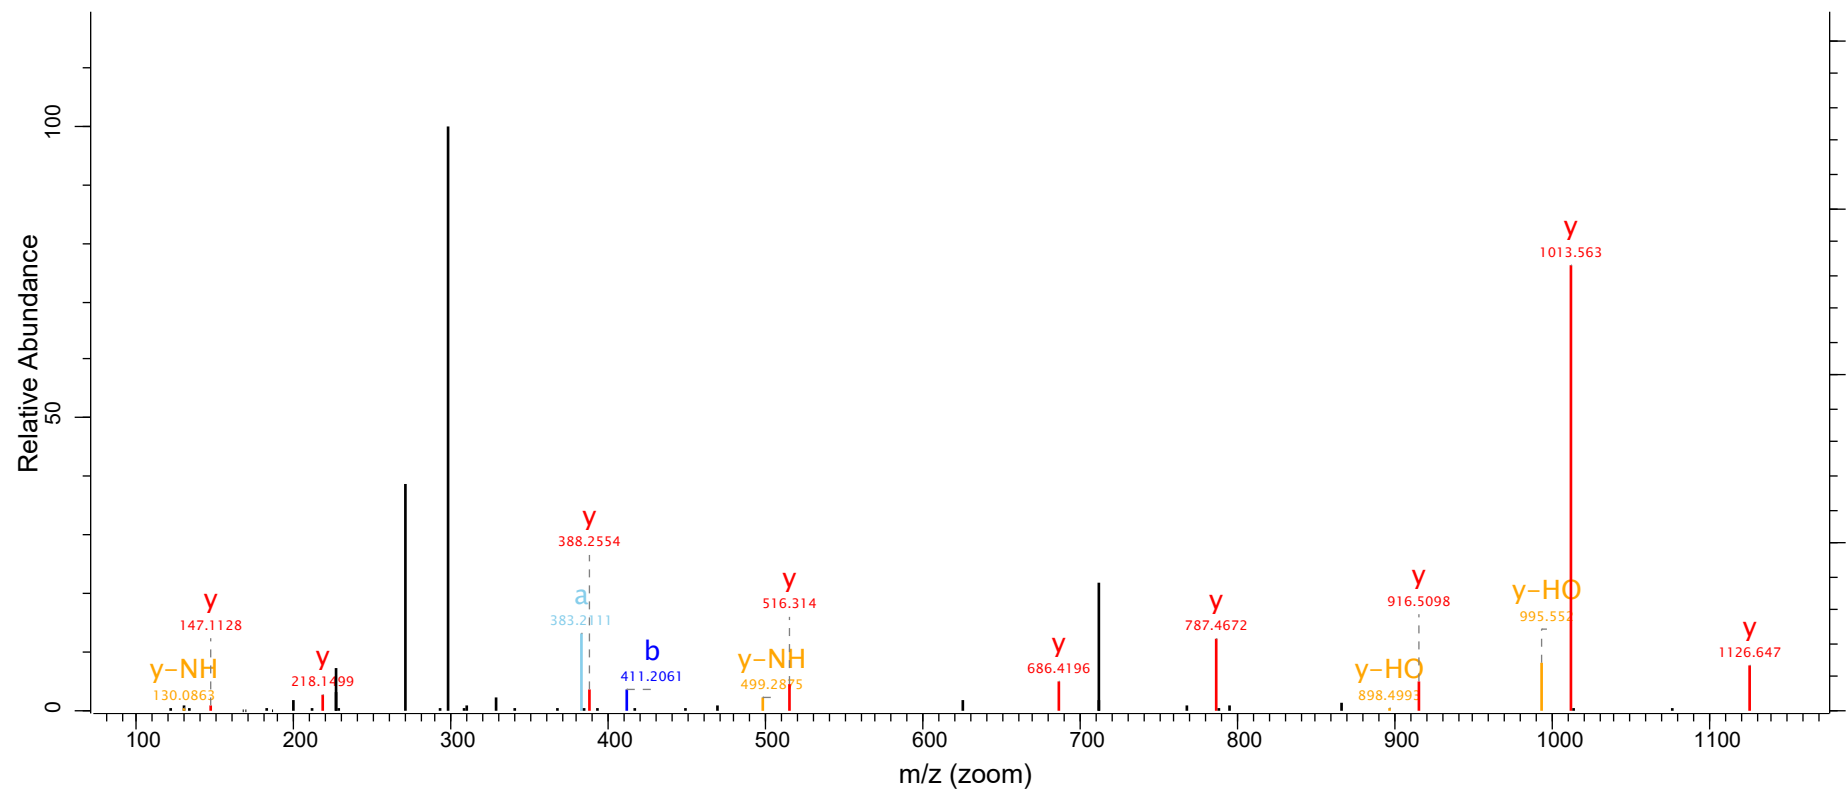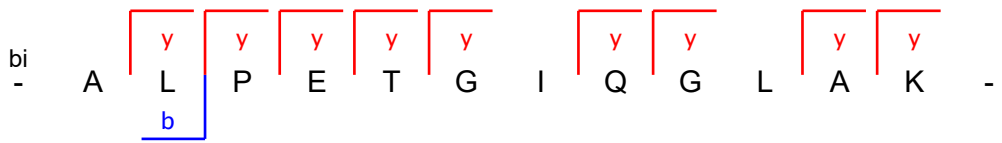

Raw File  
agg\_pep\_sort\_pos\_1

Scan  
24289

Method  
FTMS; HCD

Score  
124.86

m/z  
1027.01

Gene names  
FKBP1A

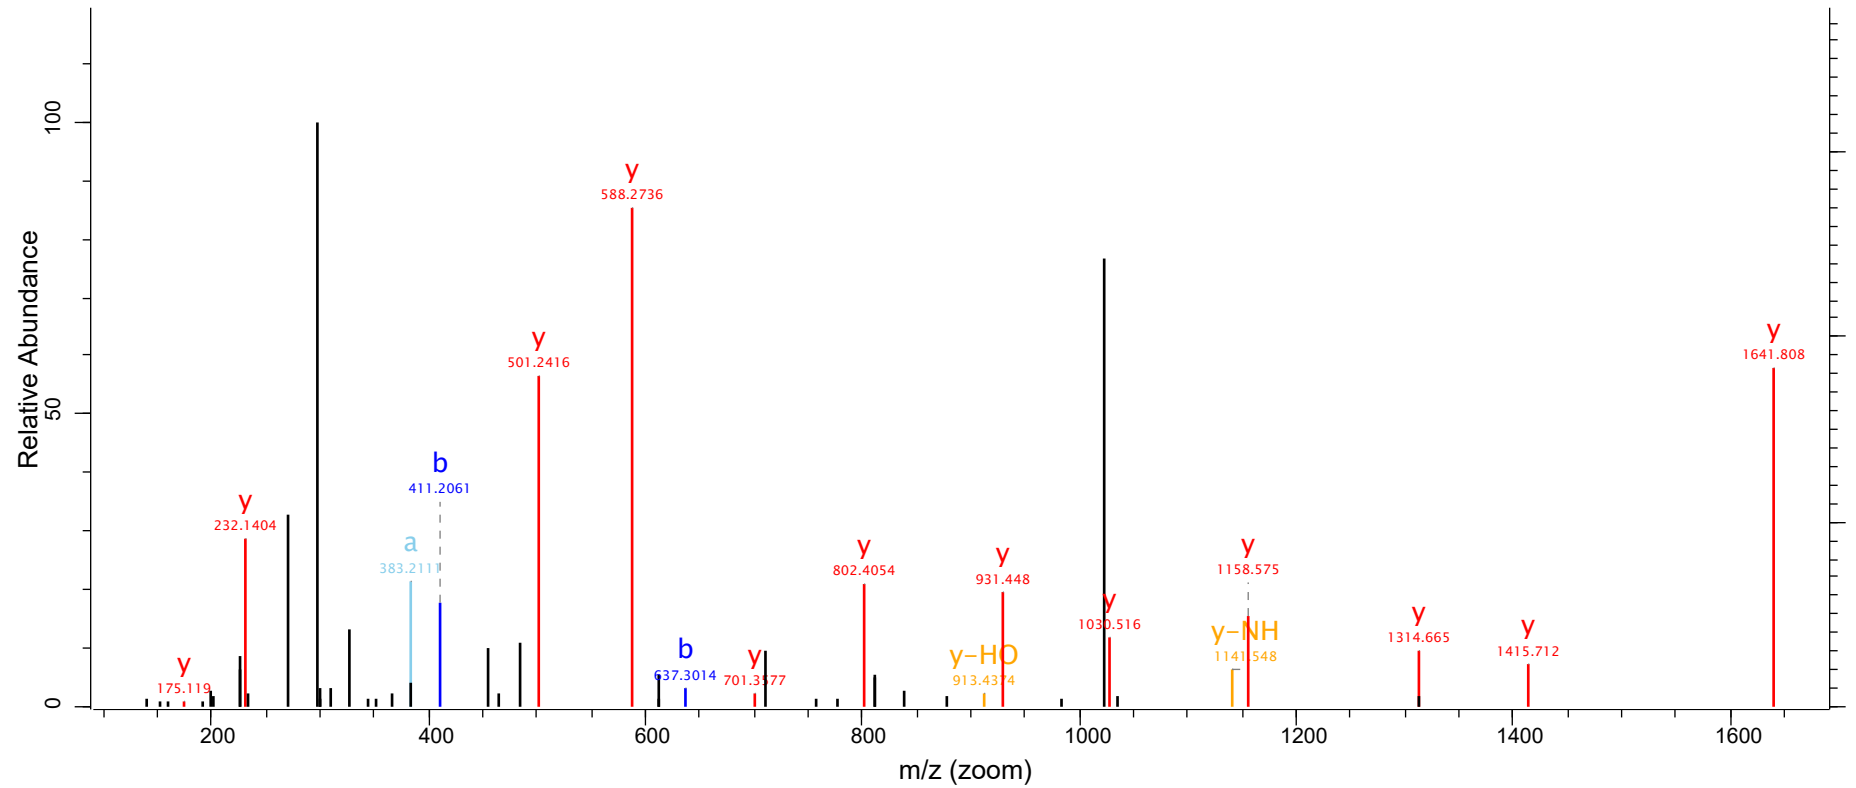

bi

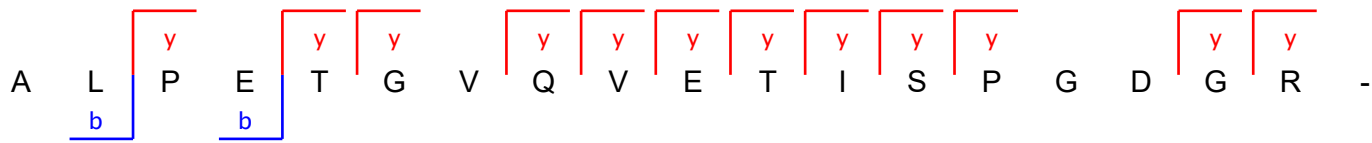

Raw File  
agg\_pep\_sort\_pos\_2

Scan  
15998

Method  
FTMS; HCD

Score  
70.93

m/z  
1093.29

Gene names  
FMNL1

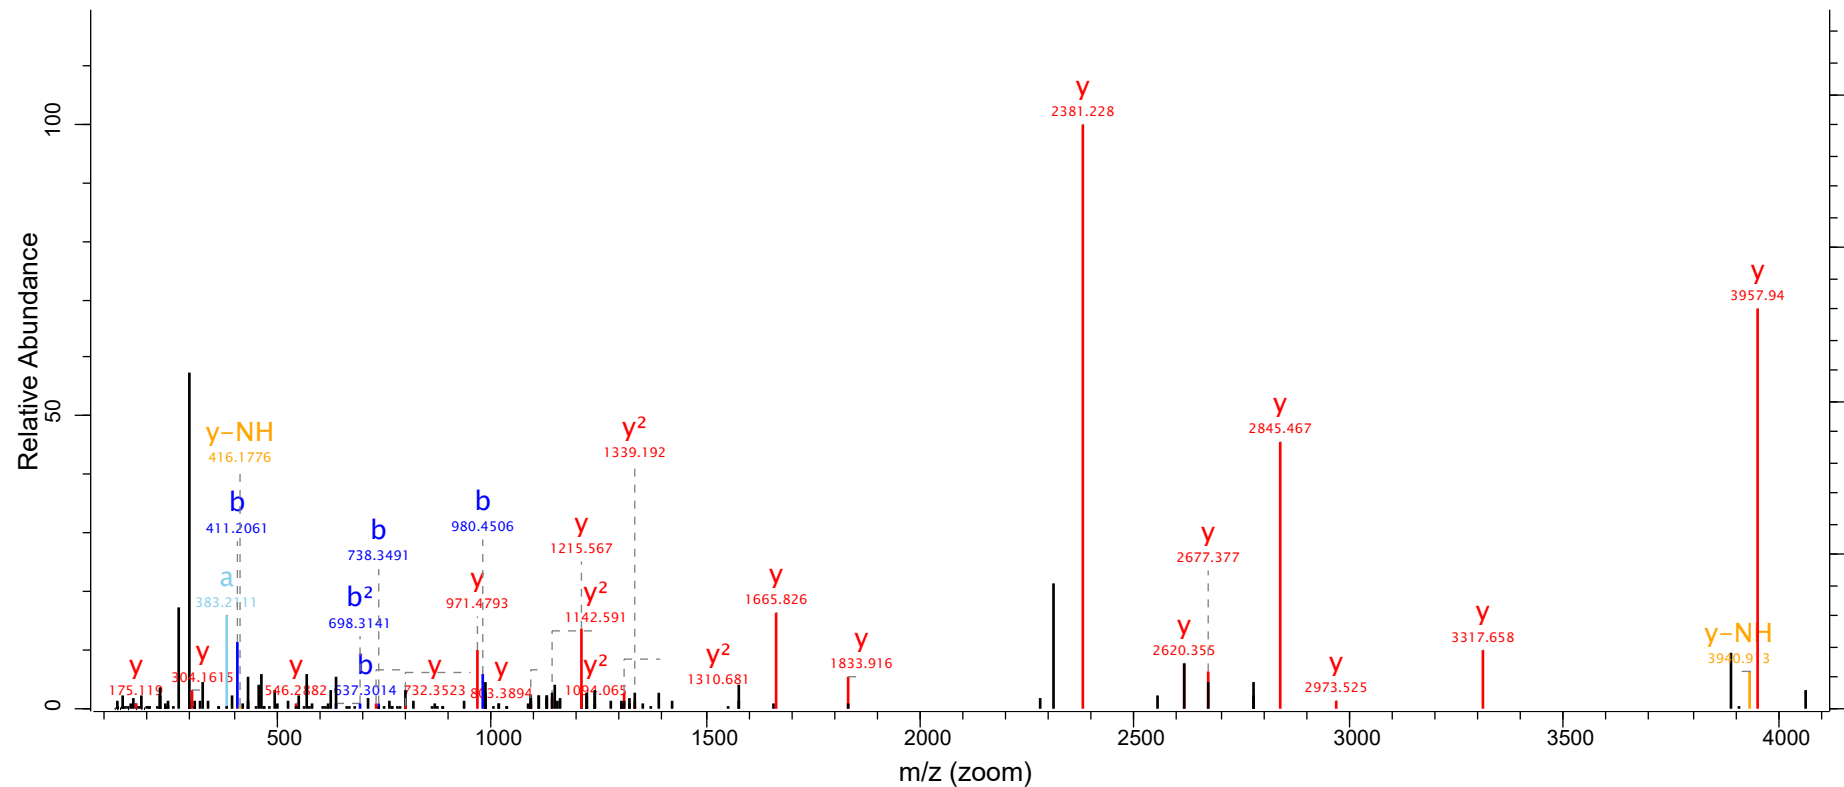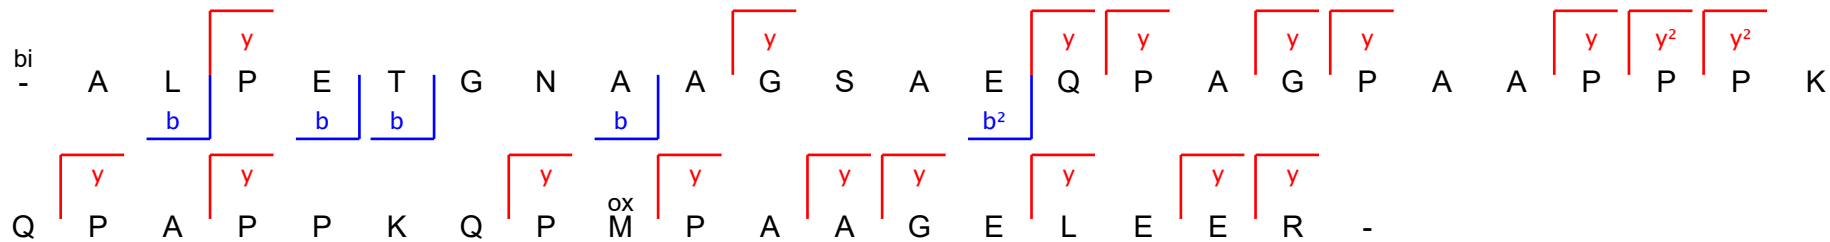



Raw File  
agg\_pep\_sort\_pos\_2

Scan  
16015

Method  
FTMS; HCD

Score  
41.56

m/z  
1015.52

Gene names  
FMNL1

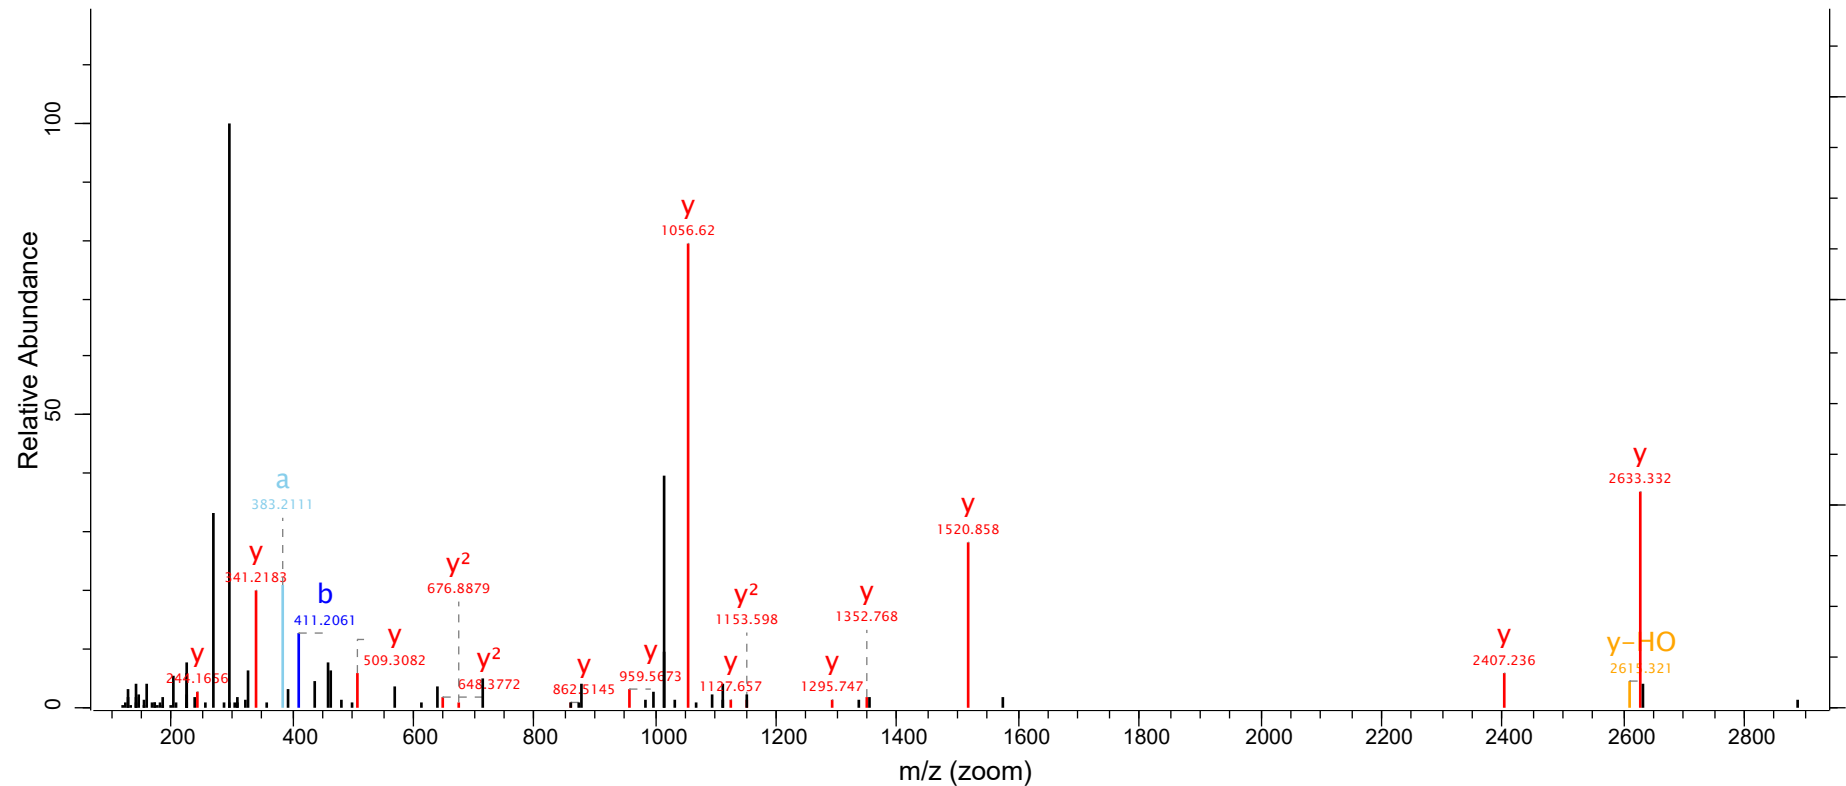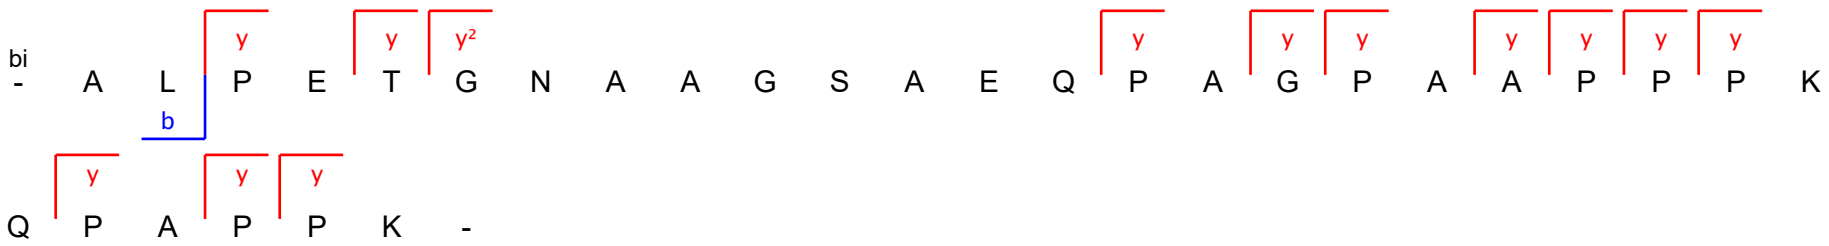

Raw File  
agg\_pep\_sort\_pos\_3

Scan  
17255

Method  
FTMS; HCD

Score  
82.31

m/z  
1089.54

Gene names  
FMNL1

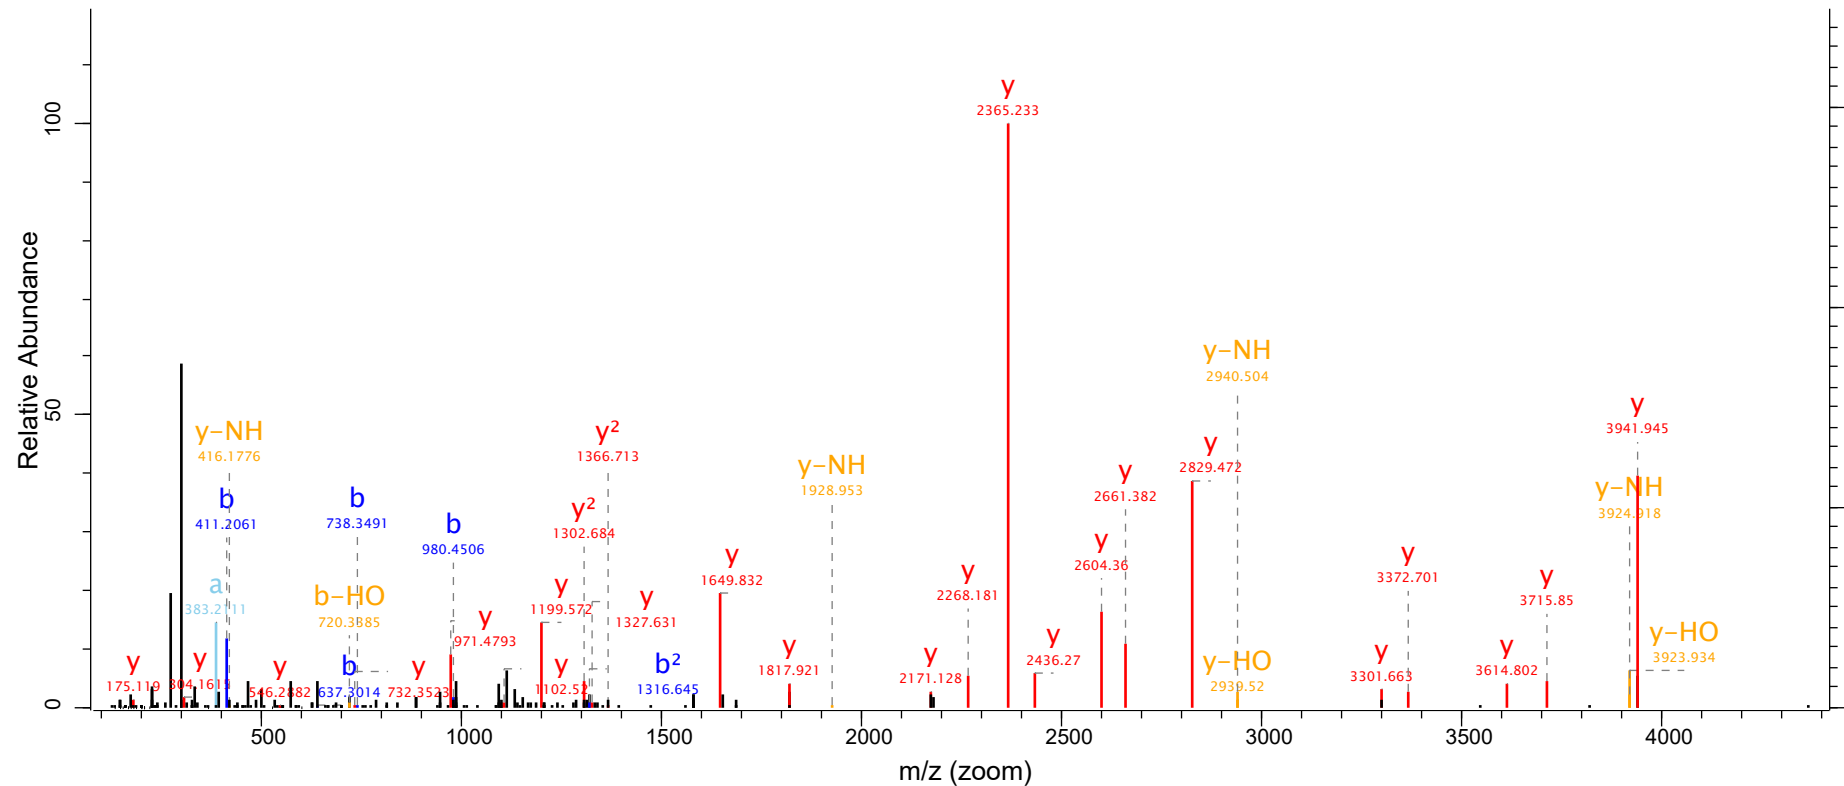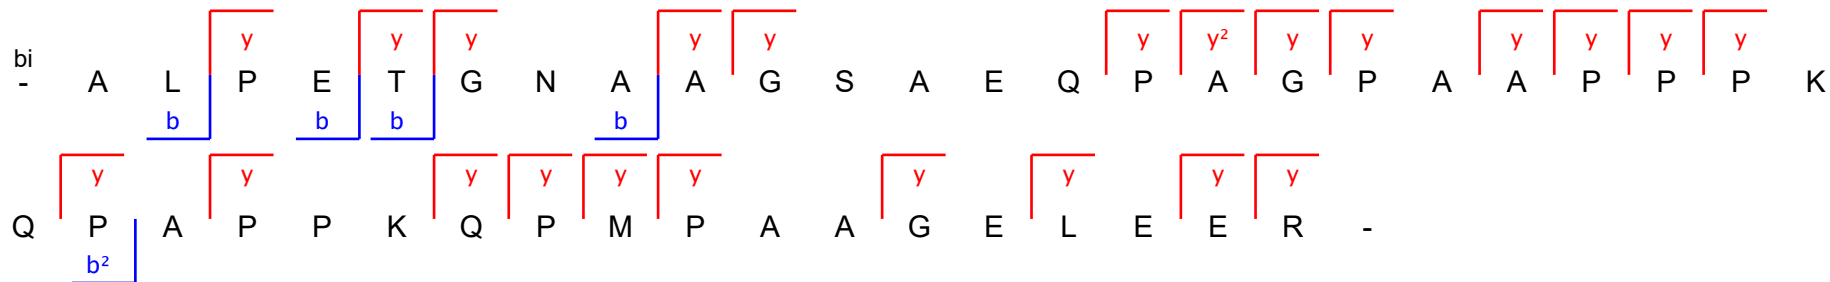

Raw File  
agg\_pep\_sort\_pos\_3

Scan  
18903

Method  
FTMS; HCD

Score  
64.52

m/z  
809.4

Gene names  
FMNL1

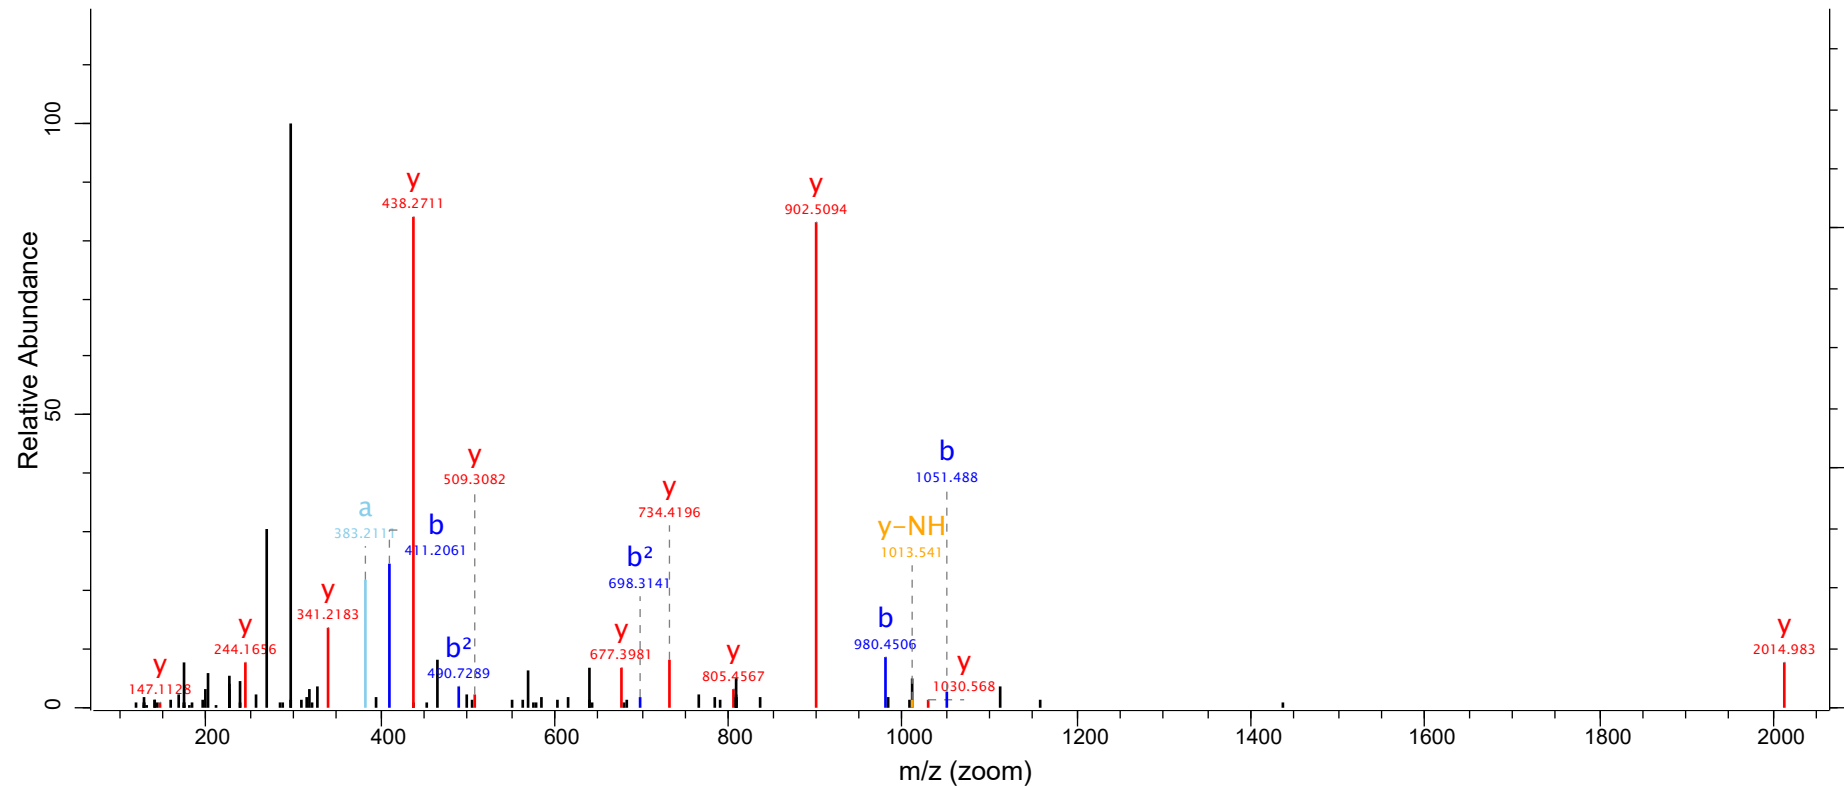

bi

A L P E T G N A A G S A E Q P A G P A A P P P K

b

b

b

b<sup>2</sup>

-

Raw File  
agg\_pep\_sort\_pos\_2

Scan  
19983

Method  
FTMS; HCD

Score  
40.35

m/z  
756.66

Gene names  
FMNL2

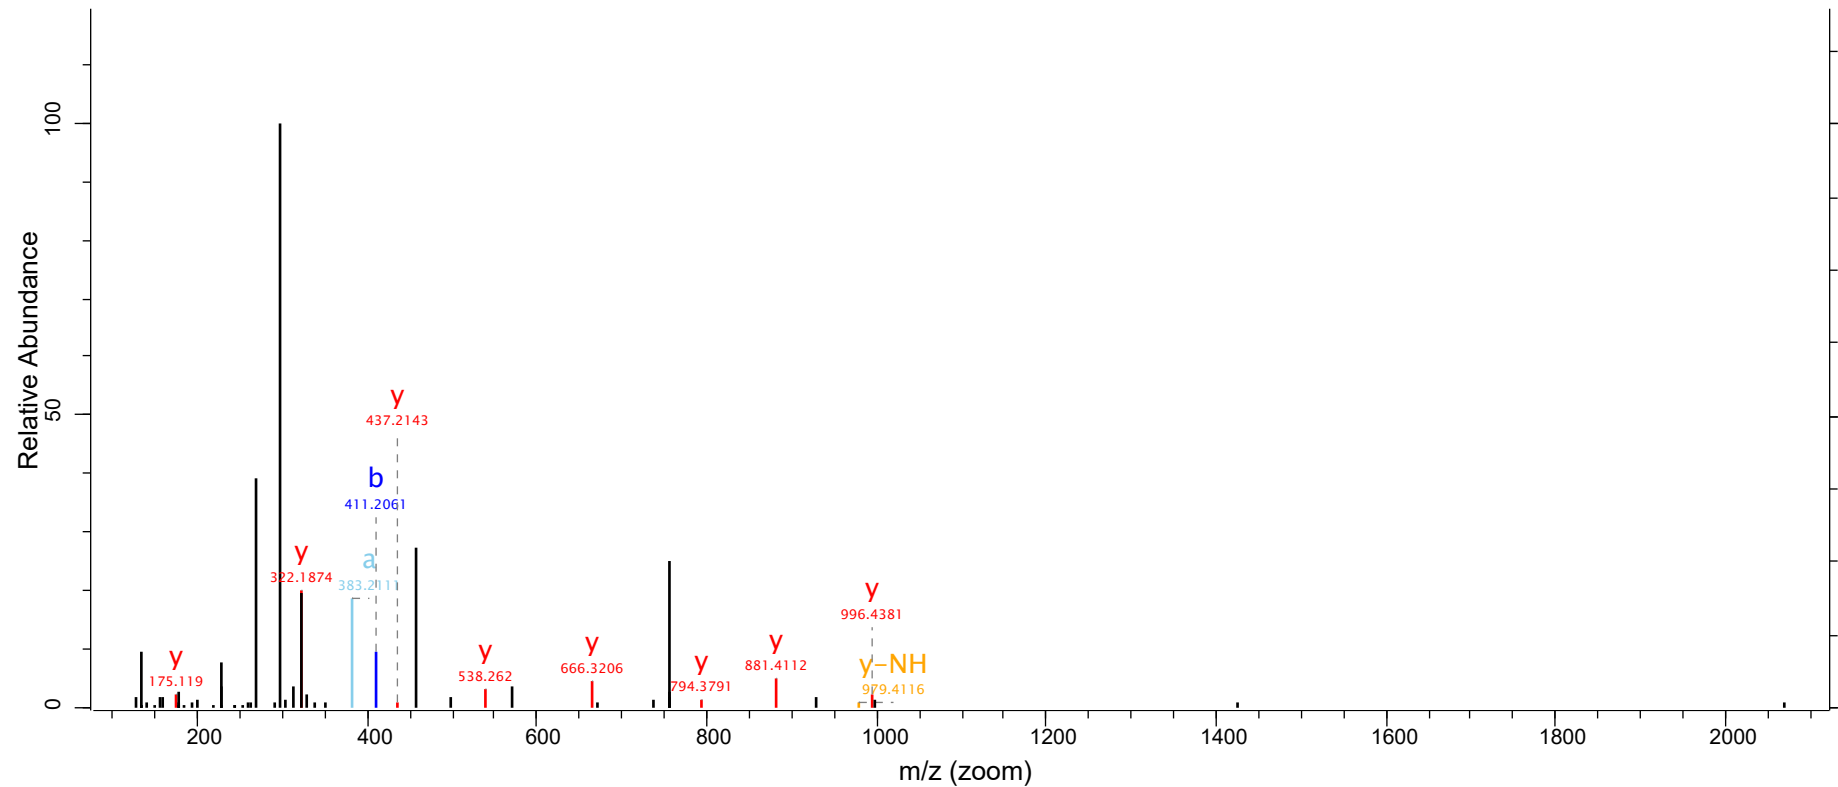

bi  
- A L P E T G N A G S ox M D S Q Q T D F R -

Fragmentation diagram showing b-ions (blue) and y-ions (red) for the peptide sequence: A L P E T G N A G S ox M D S Q Q T D F R -.

The b-ion ladder is shown for the first three residues: A (m/z 133), L (m/z 175), and P (m/z 217). The y-ion ladder is shown for the last eight residues: M (m/z 147), D (m/z 189), S (m/z 231), Q (m/z 273), Q (m/z 315), T (m/z 357), D (m/z 399), and F (m/z 441). The oxM residue is also labeled.

Raw File  
agg\_pep\_sort\_pos\_3

Scan  
21412

Method  
FTMS; HCD

Score  
71.56

m/z  
751.33

Gene names  
FMNL2

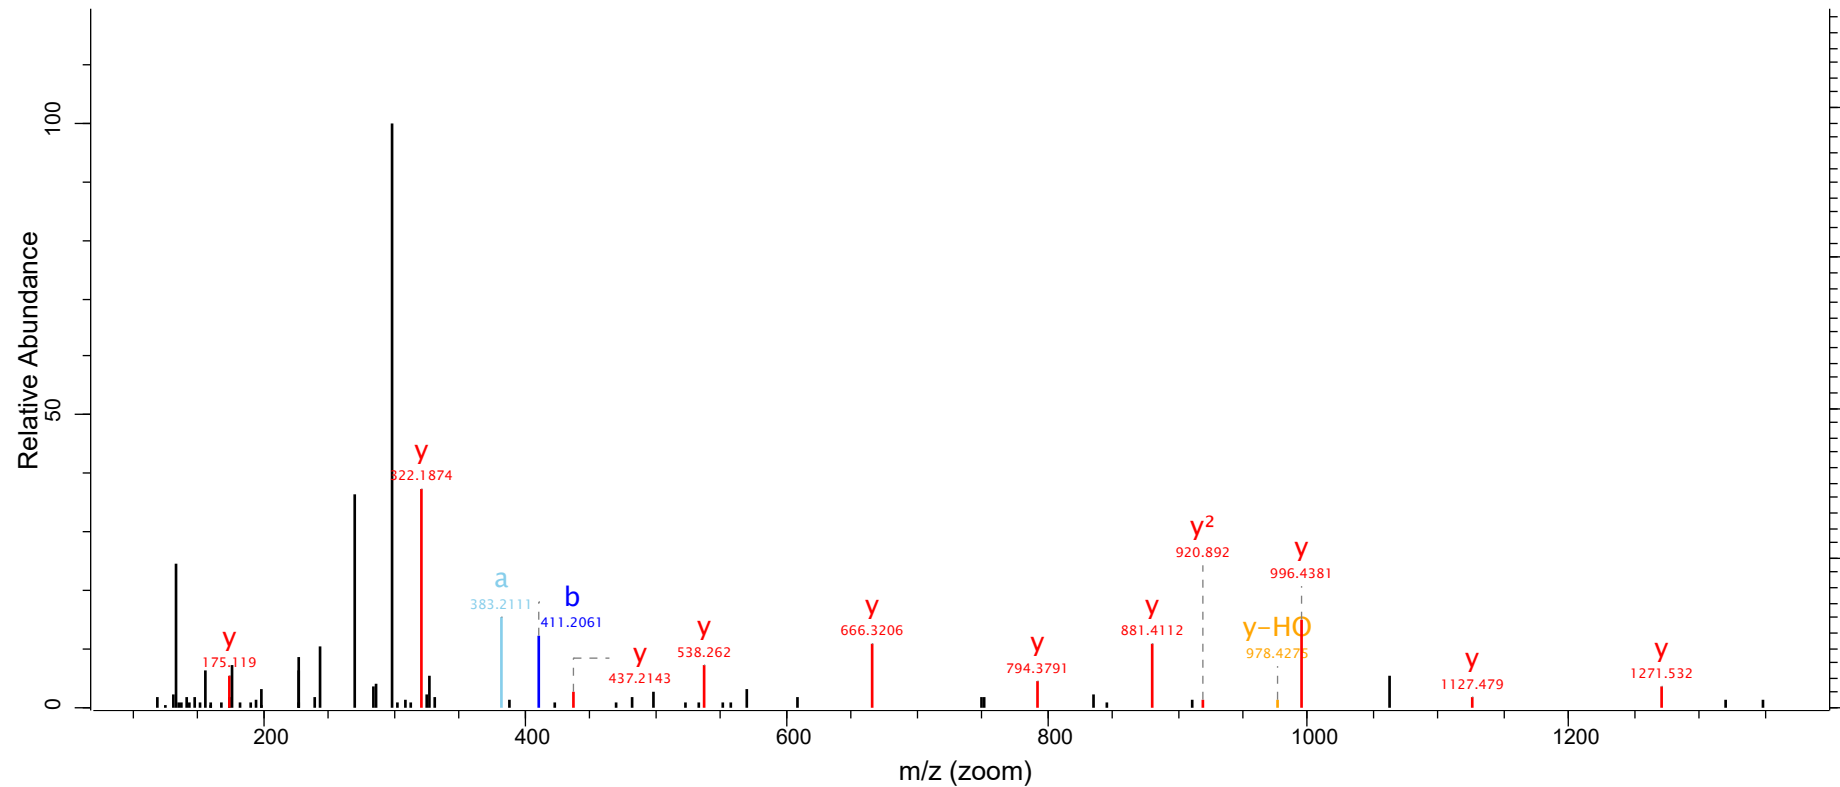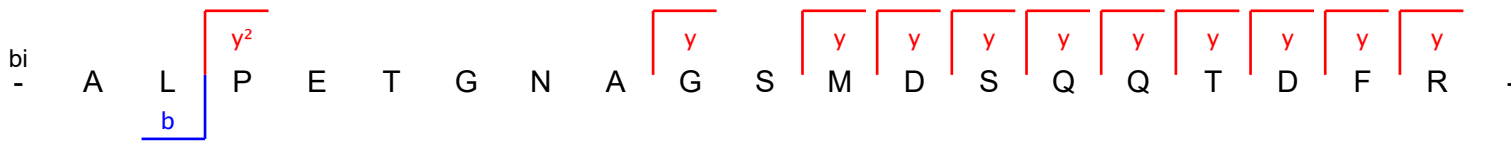

Raw File  
agg\_pep\_sort\_pos\_3

Scan  
16575

Method  
FTMS; HCD

Score  
65.56

m/z  
590.31

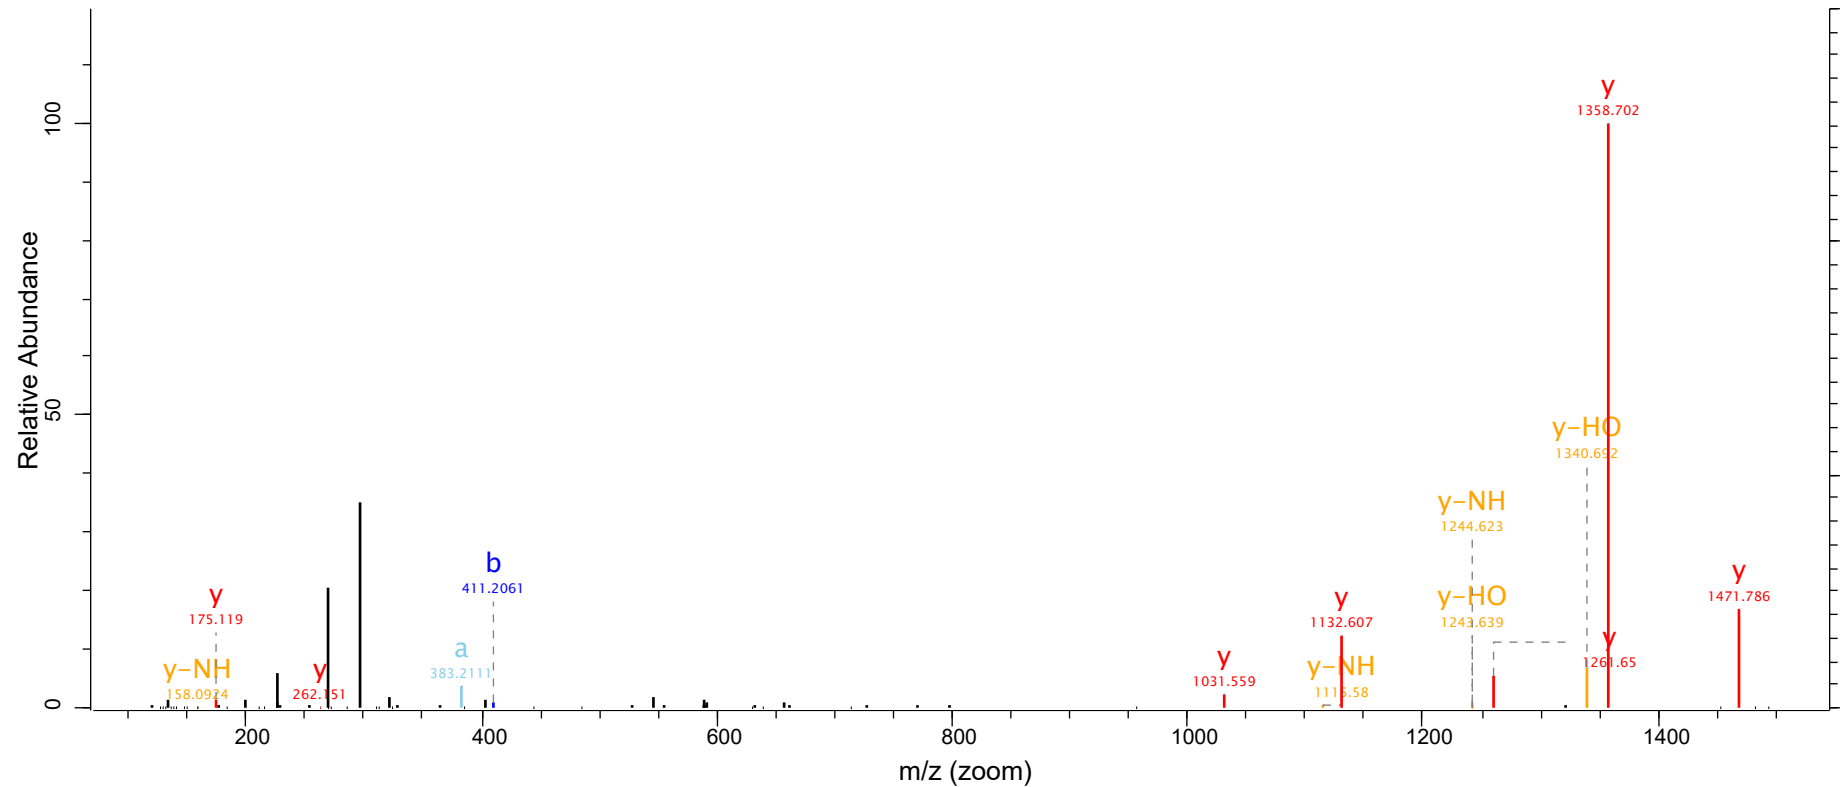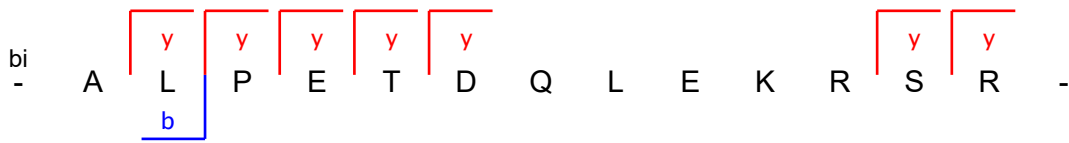

Raw File  
agg\_pep\_sort\_pos\_2

Scan  
12916

Method  
FTMS; HCD

Score  
116.37

m/z  
584.82

Gene names  
GAPDH

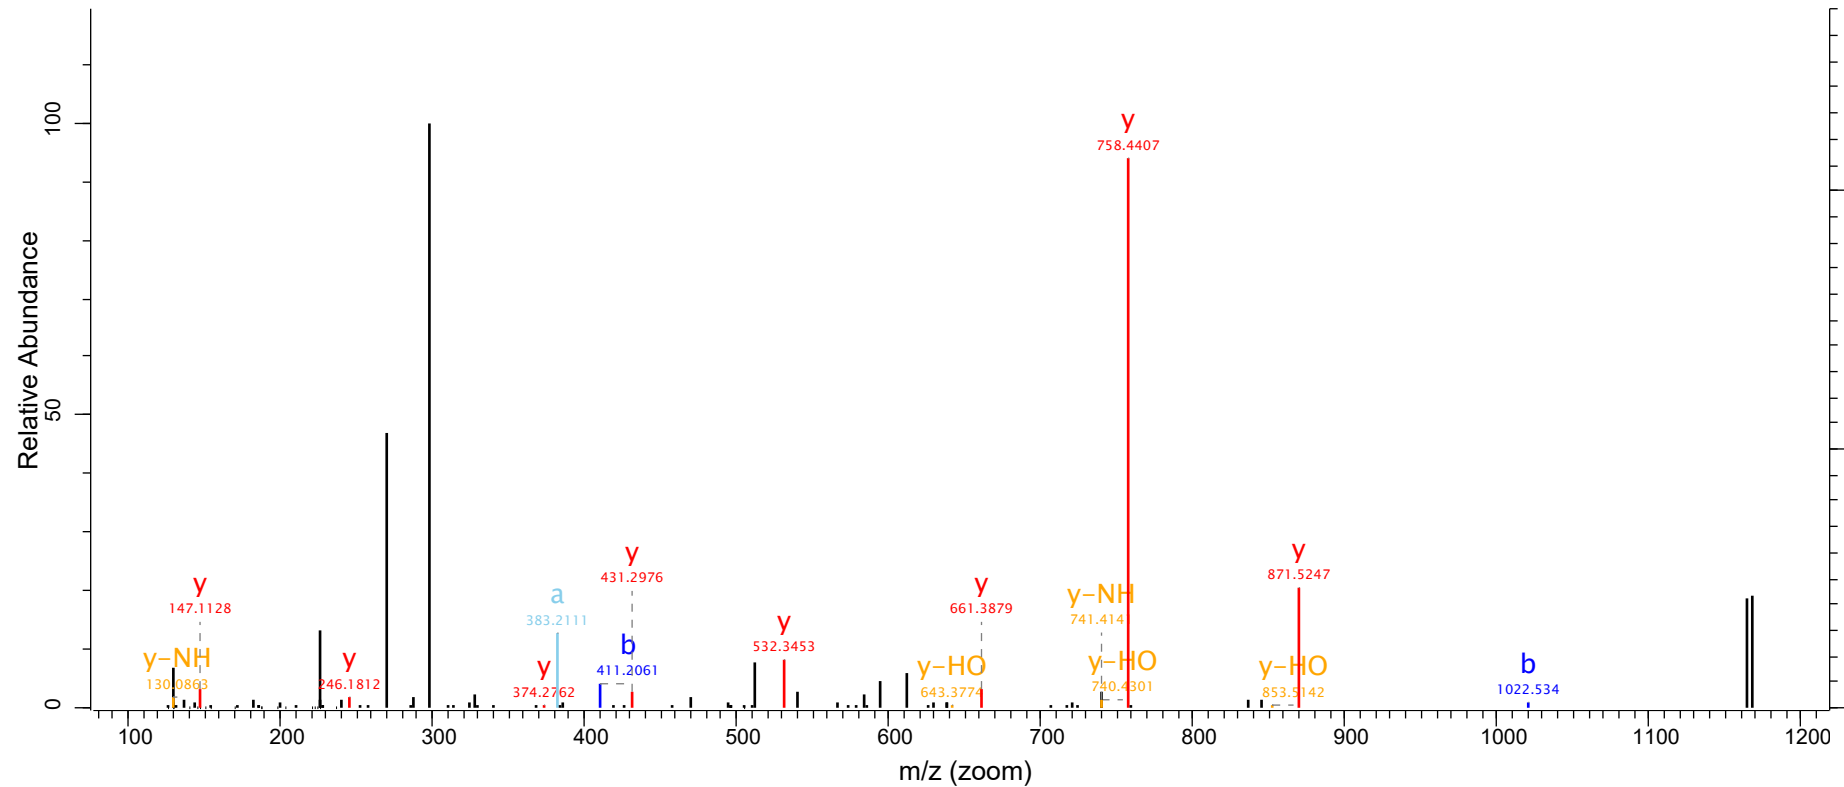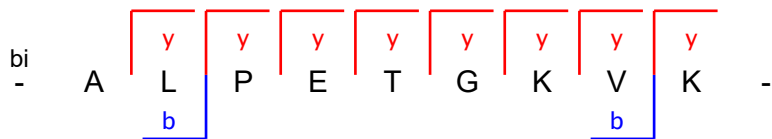

Raw File  
agg\_pep\_sort\_pos\_1

Scan  
17445

Method  
FTMS; HCD

Score  
97.84

m/z  
652.69

Gene names  
GAPDH

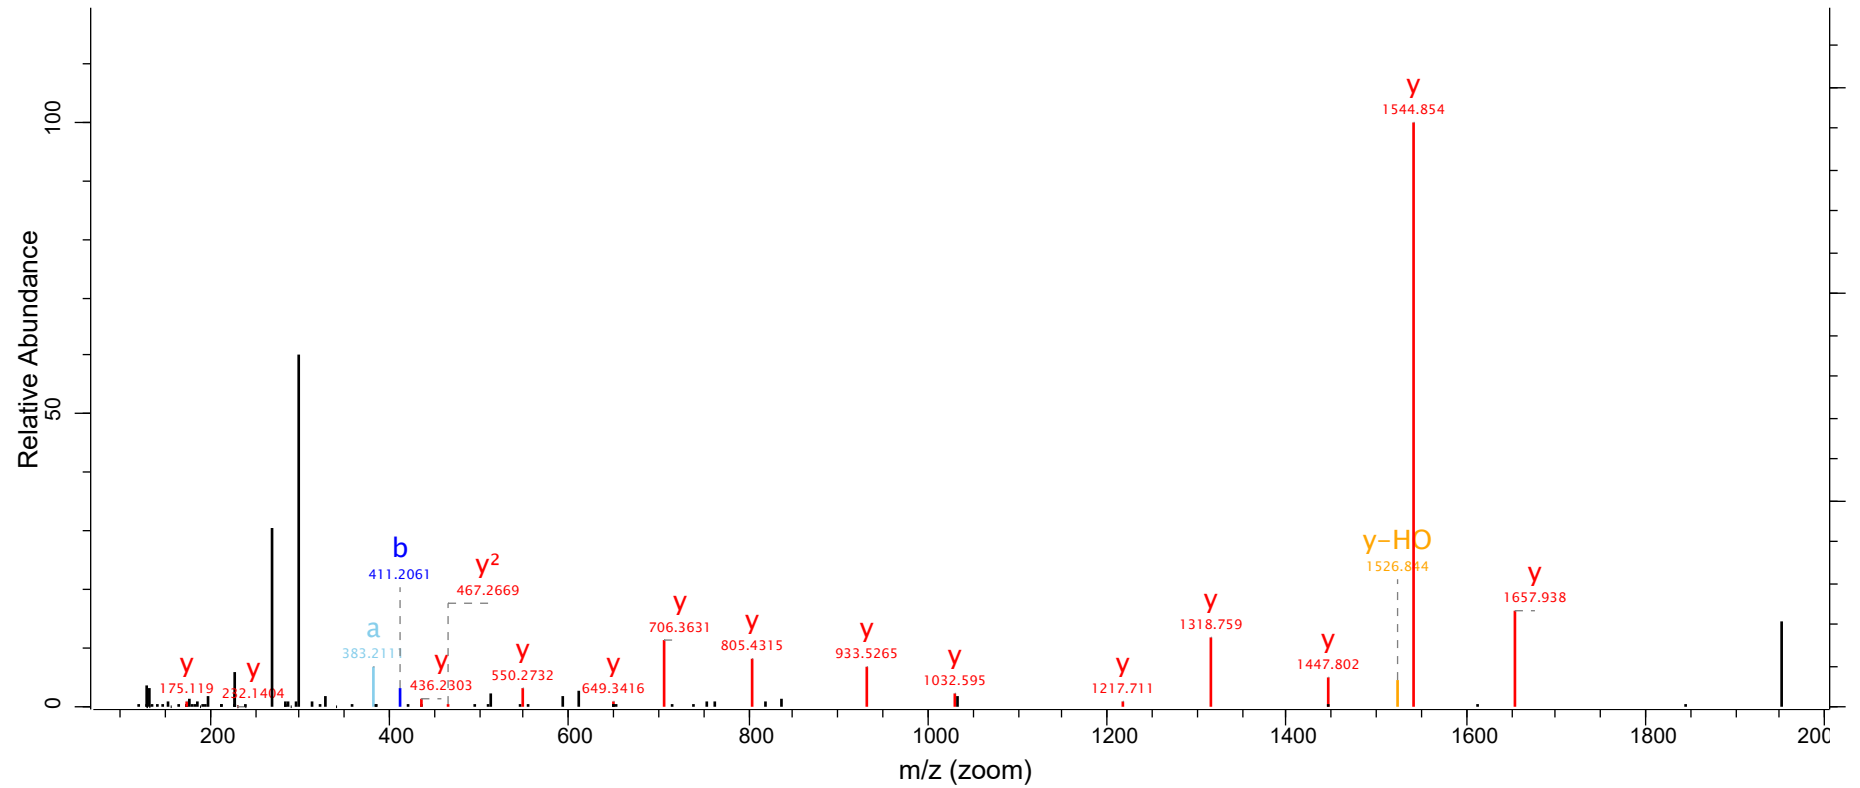

bi

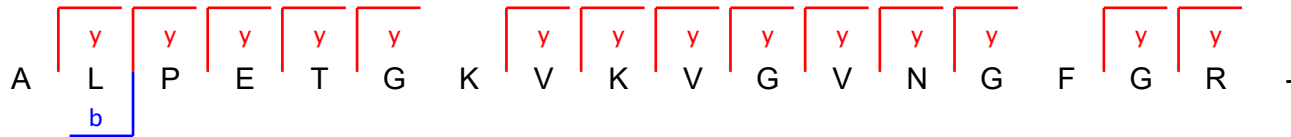



Raw File  
agg\_pep\_sort\_pos\_3

Scan  
25685

Method  
FTMS; HCD

Score  
172.84

m/z  
842.76

Gene names  
GCLC

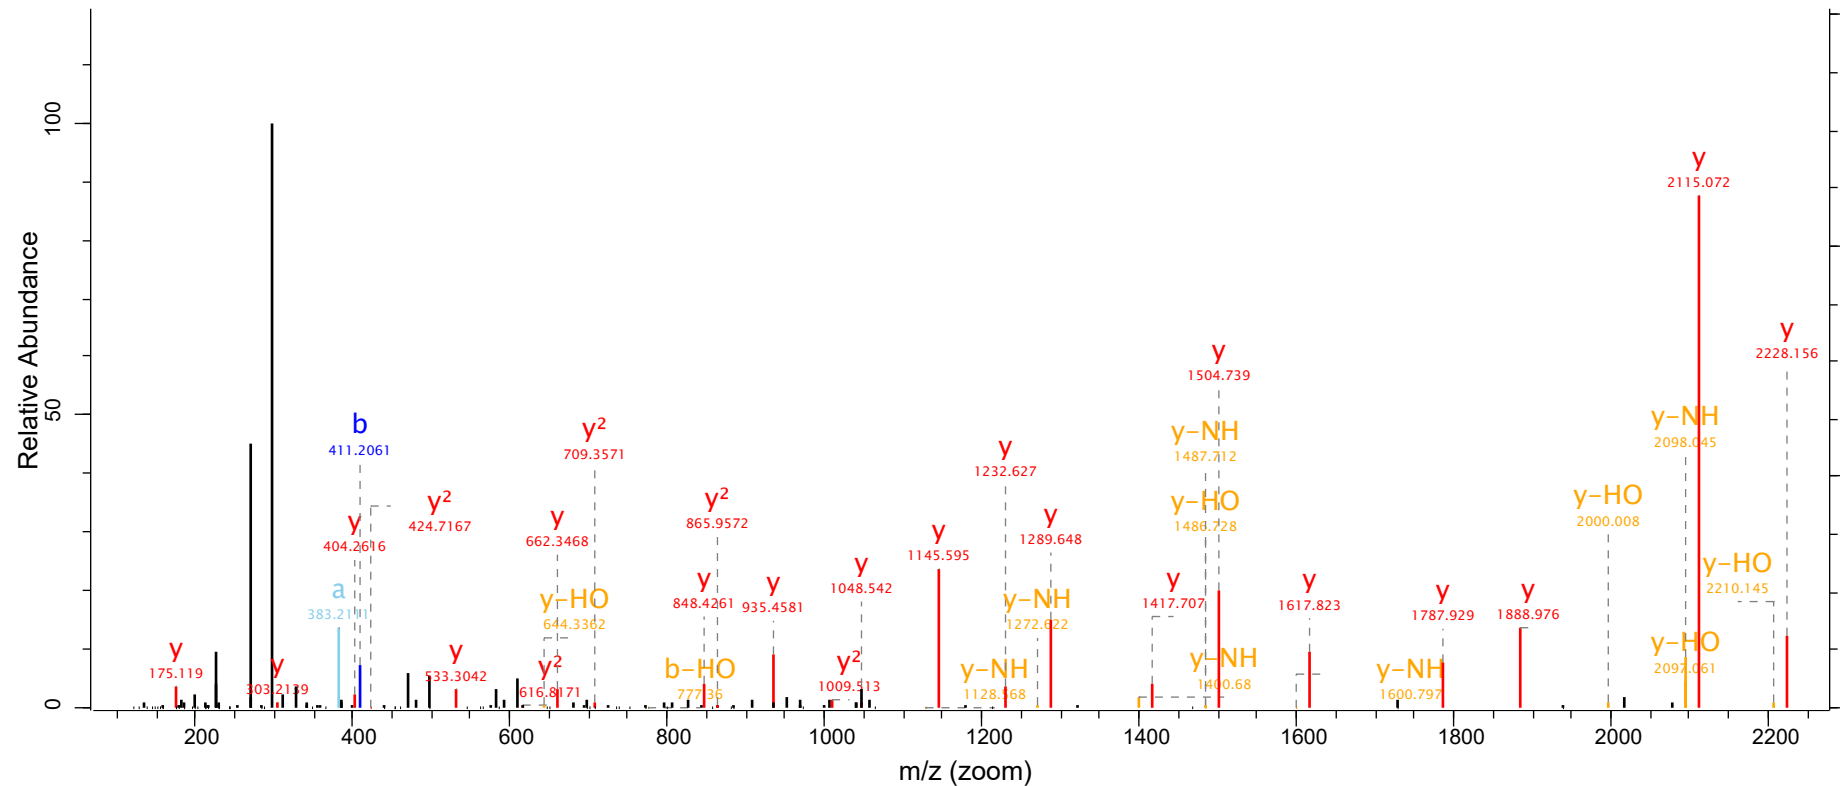

bi

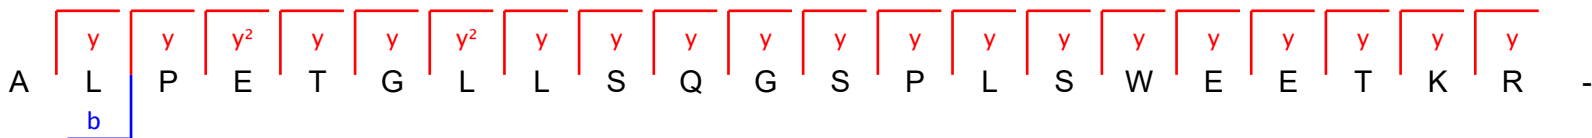

Raw File  
agg\_pep\_sort\_pos\_3

Scan  
18017

Method  
FTMS; HCD

Score  
104.61

m/z  
749.03

Gene names  
GNAI1;GNAI3

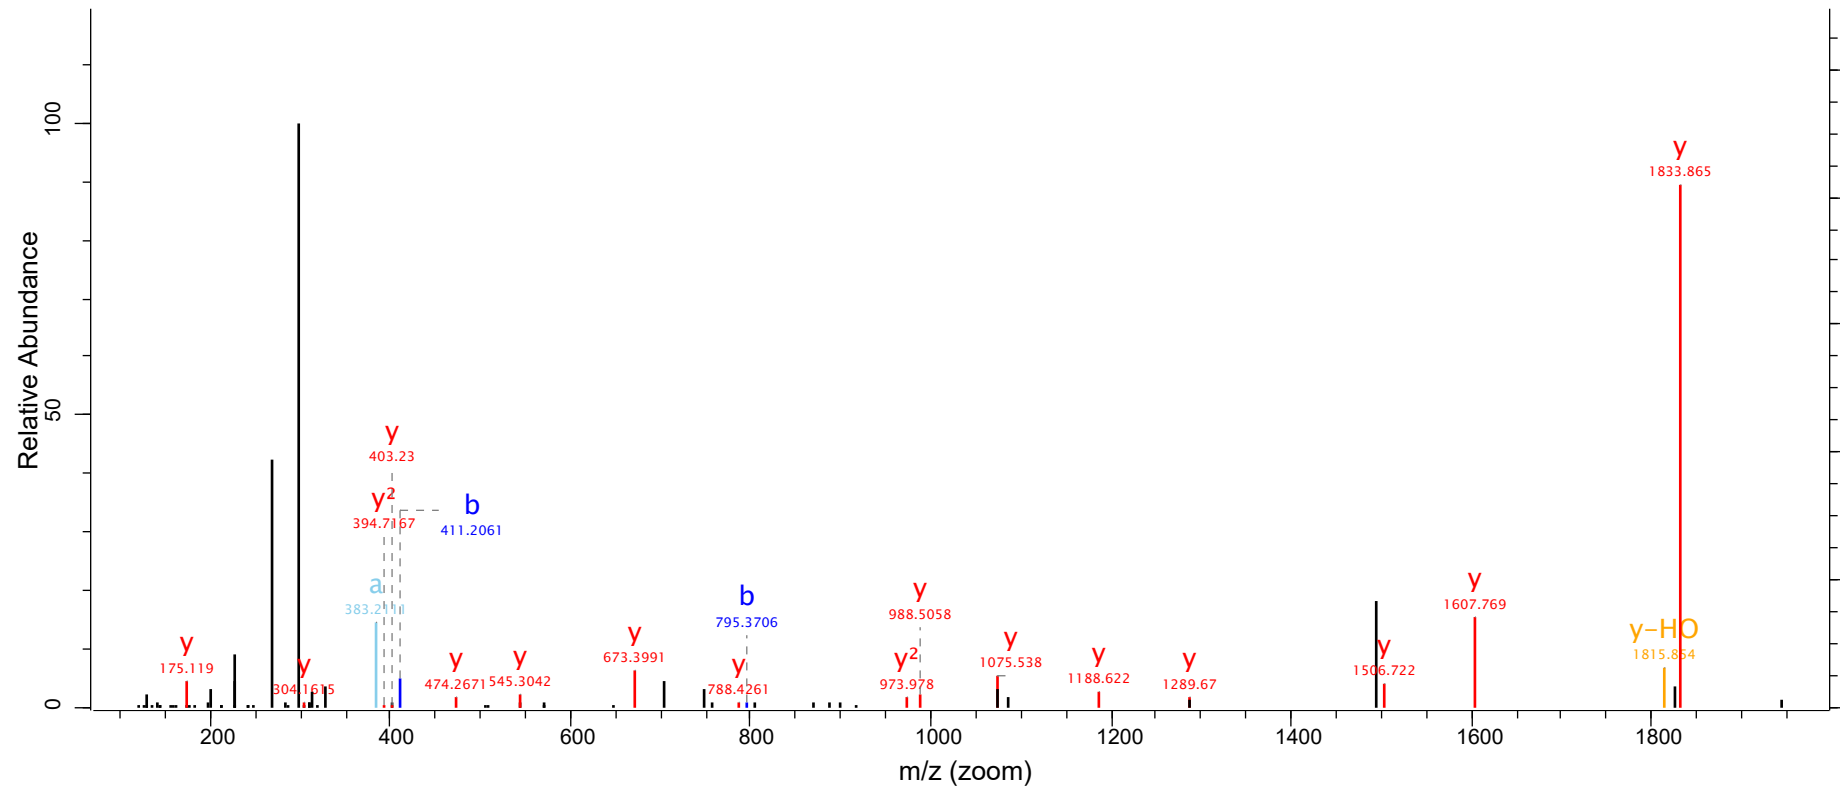

bi

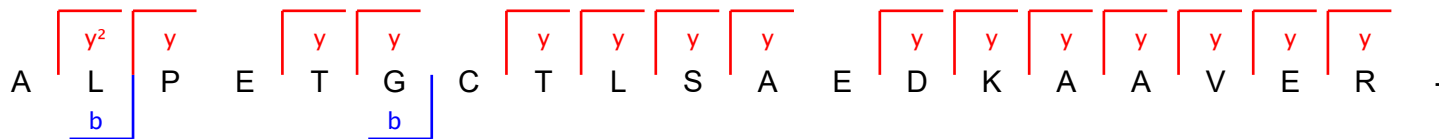

Raw File  
agg\_pep\_sort\_pos\_2

Scan  
20403

Method  
FTMS; HCD

Score  
49.5

m/z  
859.89

Gene names  
GNAI1;GNAI3

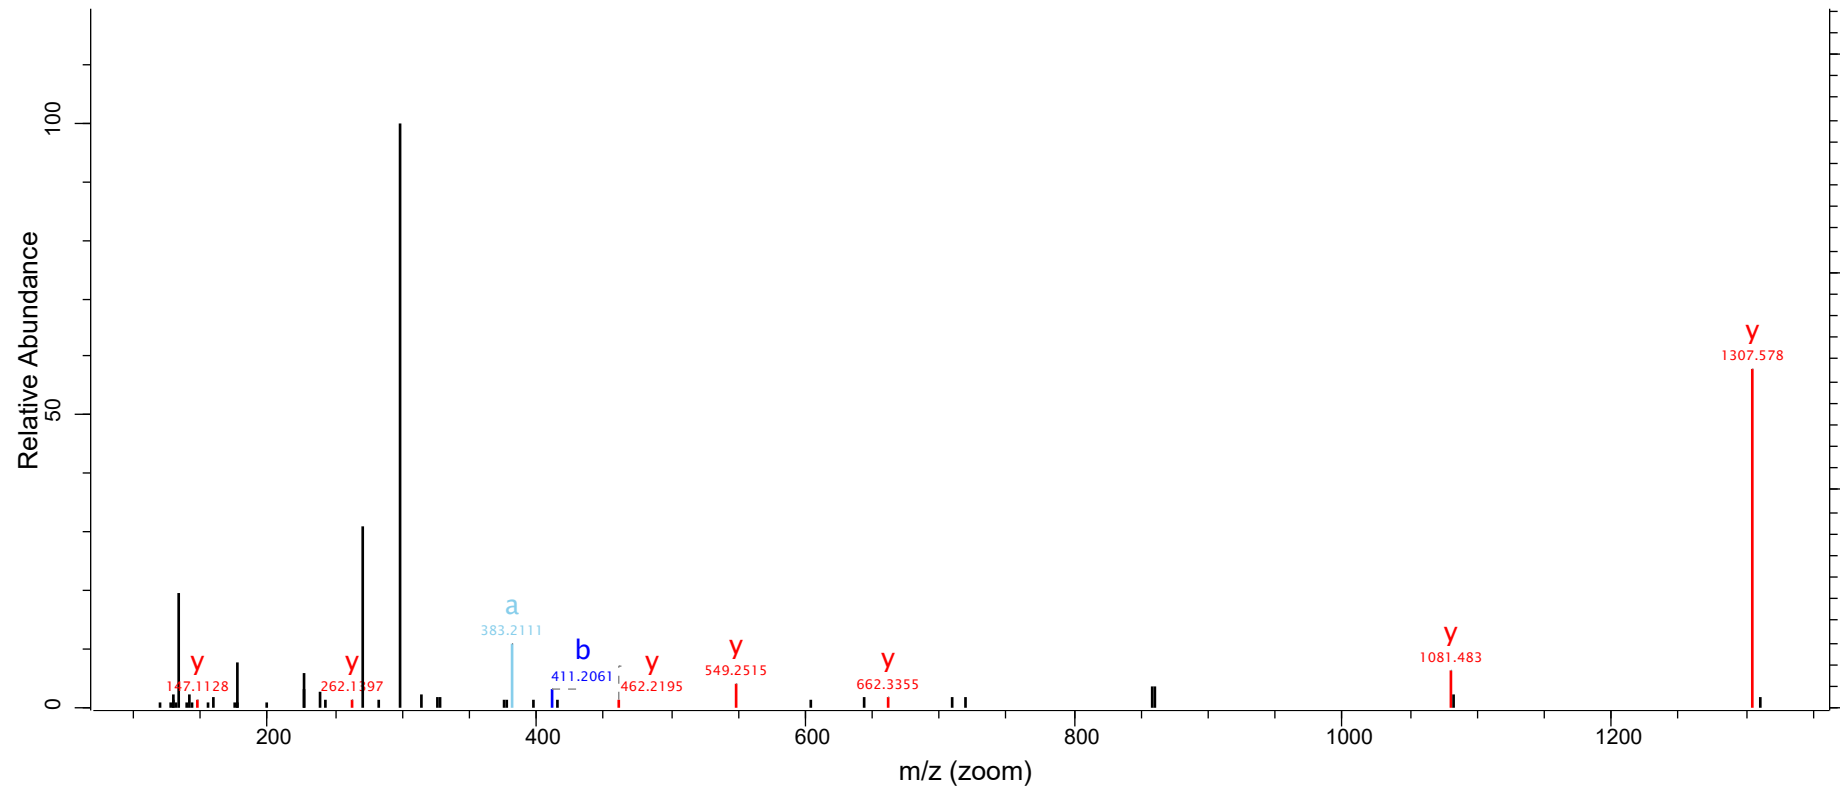

bi  
- bi  
A L P E T G C T L S A E D K -

Fragmentation diagram showing the sequence A L P E T G C T L S A E D K - with red brackets indicating y-ions and blue brackets indicating b-ions. The b-ion is labeled 'b' and the y-ion is labeled 'y'.

Raw File  
agg\_pep\_sort\_pos\_3

Scan  
16044

Method  
FTMS; HCD

Score  
141.86

m/z  
735.01

Gene names  
GNAI2

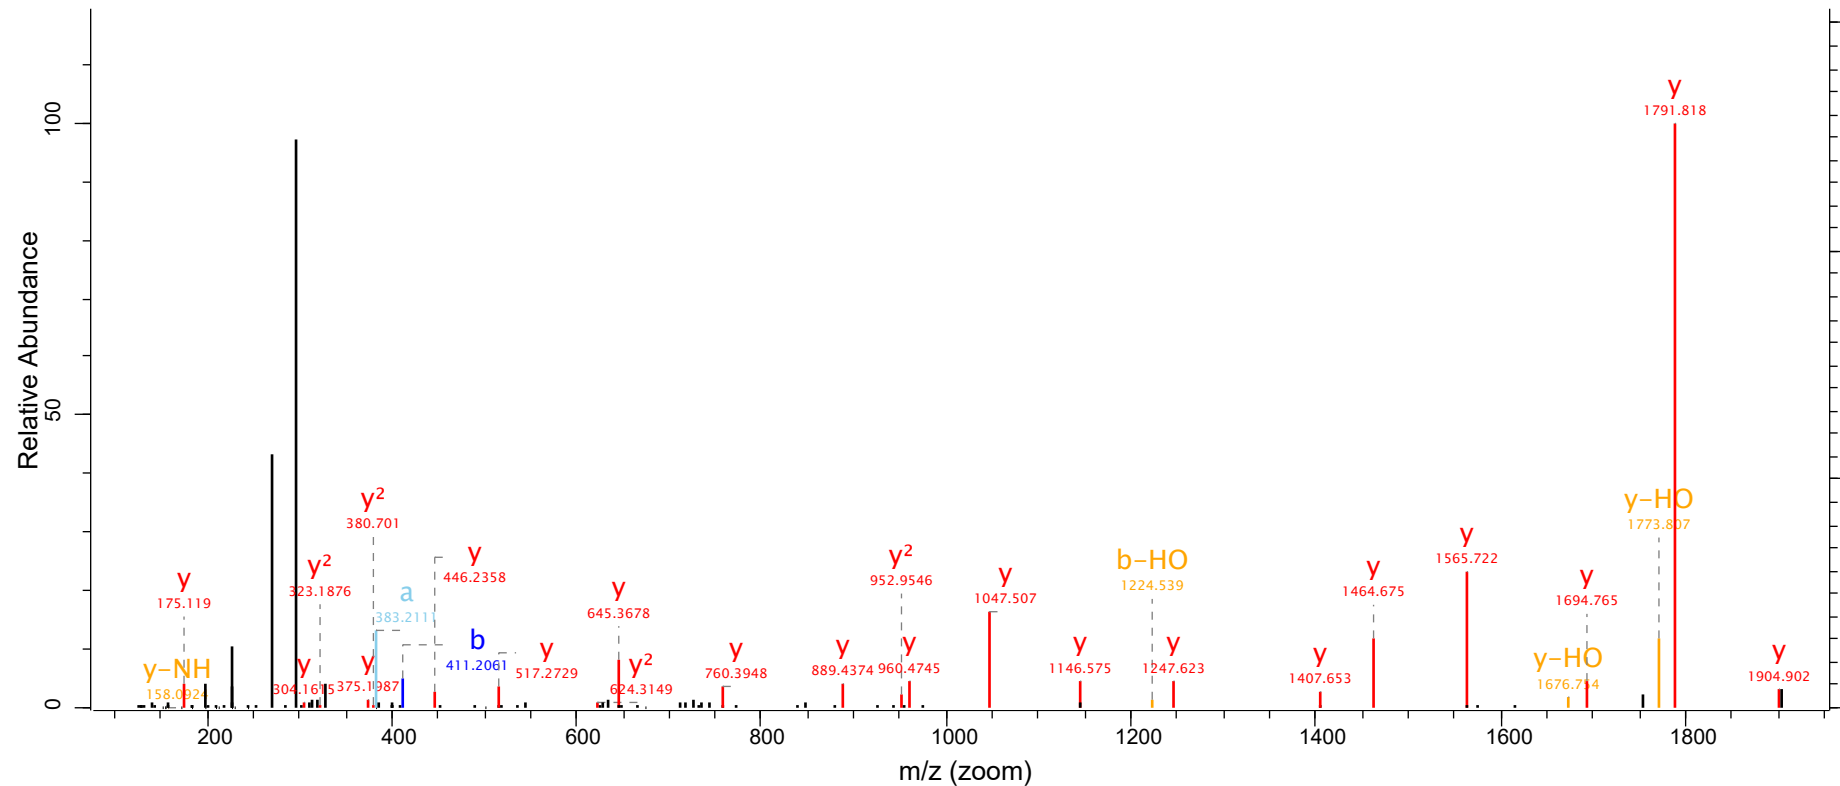

bi

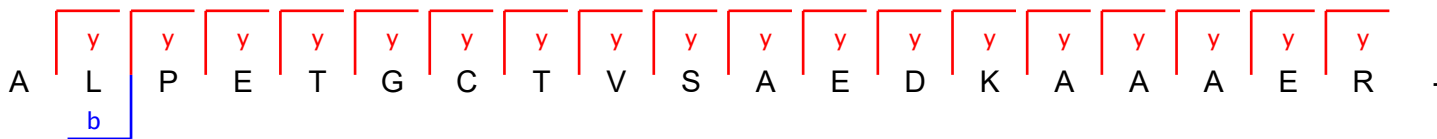

Raw File  
agg\_pep\_sort\_pos\_1

Scan  
19277

Method  
FTMS; HCD

Score  
85.29

m/z  
852.38

Gene names  
GNAI2

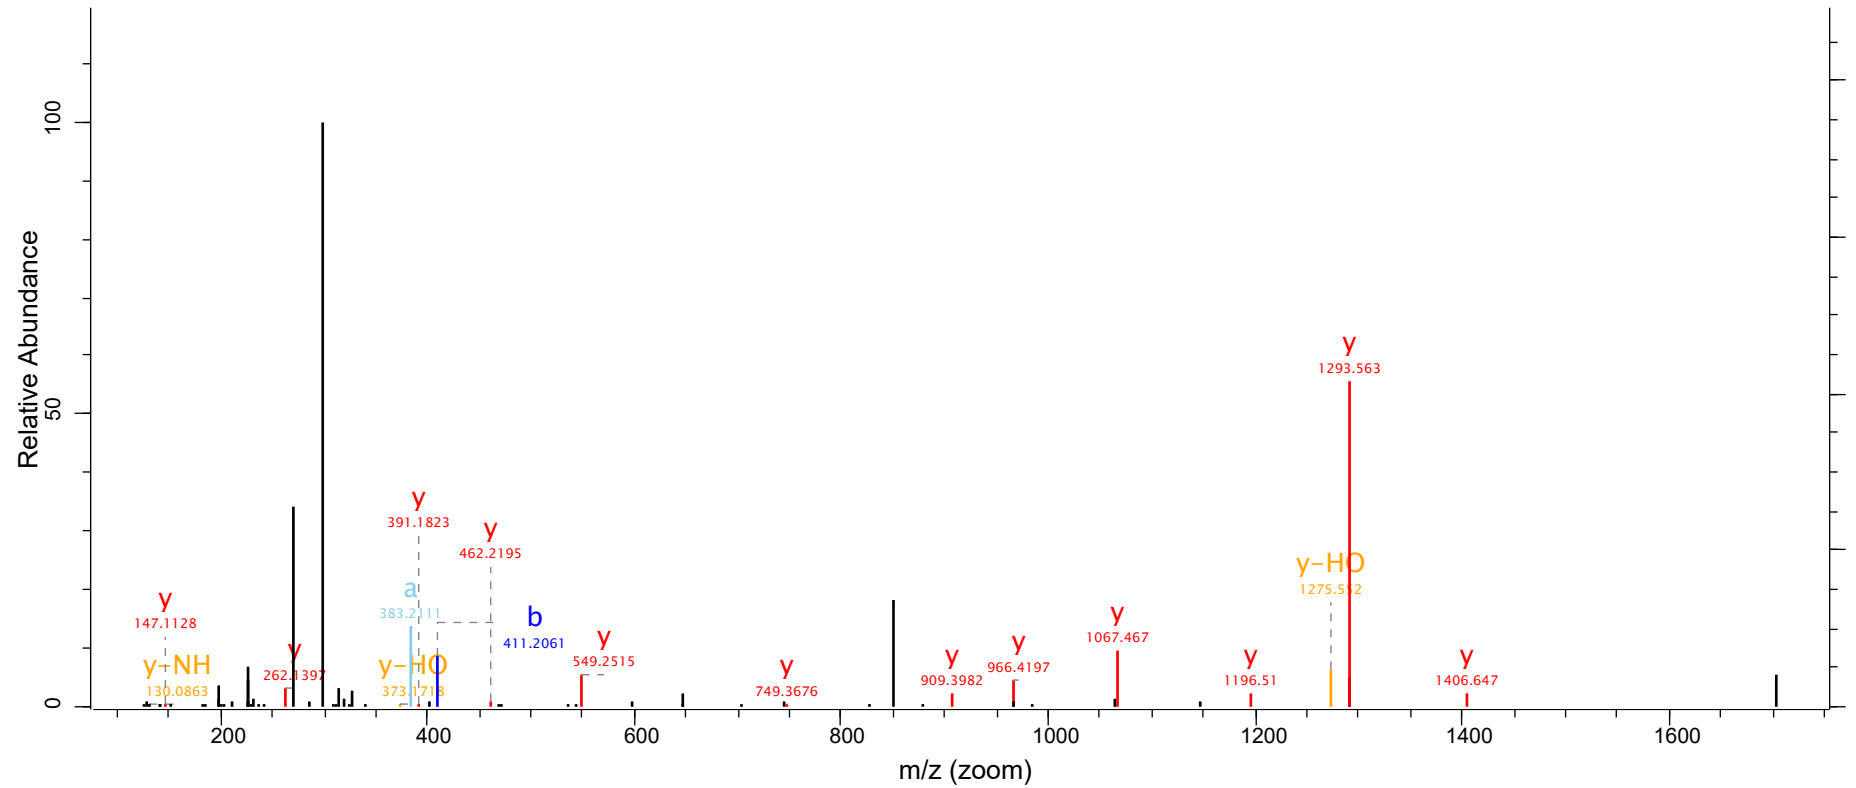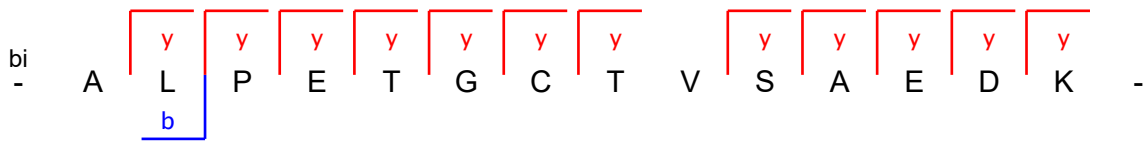

Raw File  
agg\_pep\_sort\_pos\_2

Scan  
20634

Method  
FTMS; HCD

Score  
113.63

m/z  
880.9

Gene names  
GNAO1

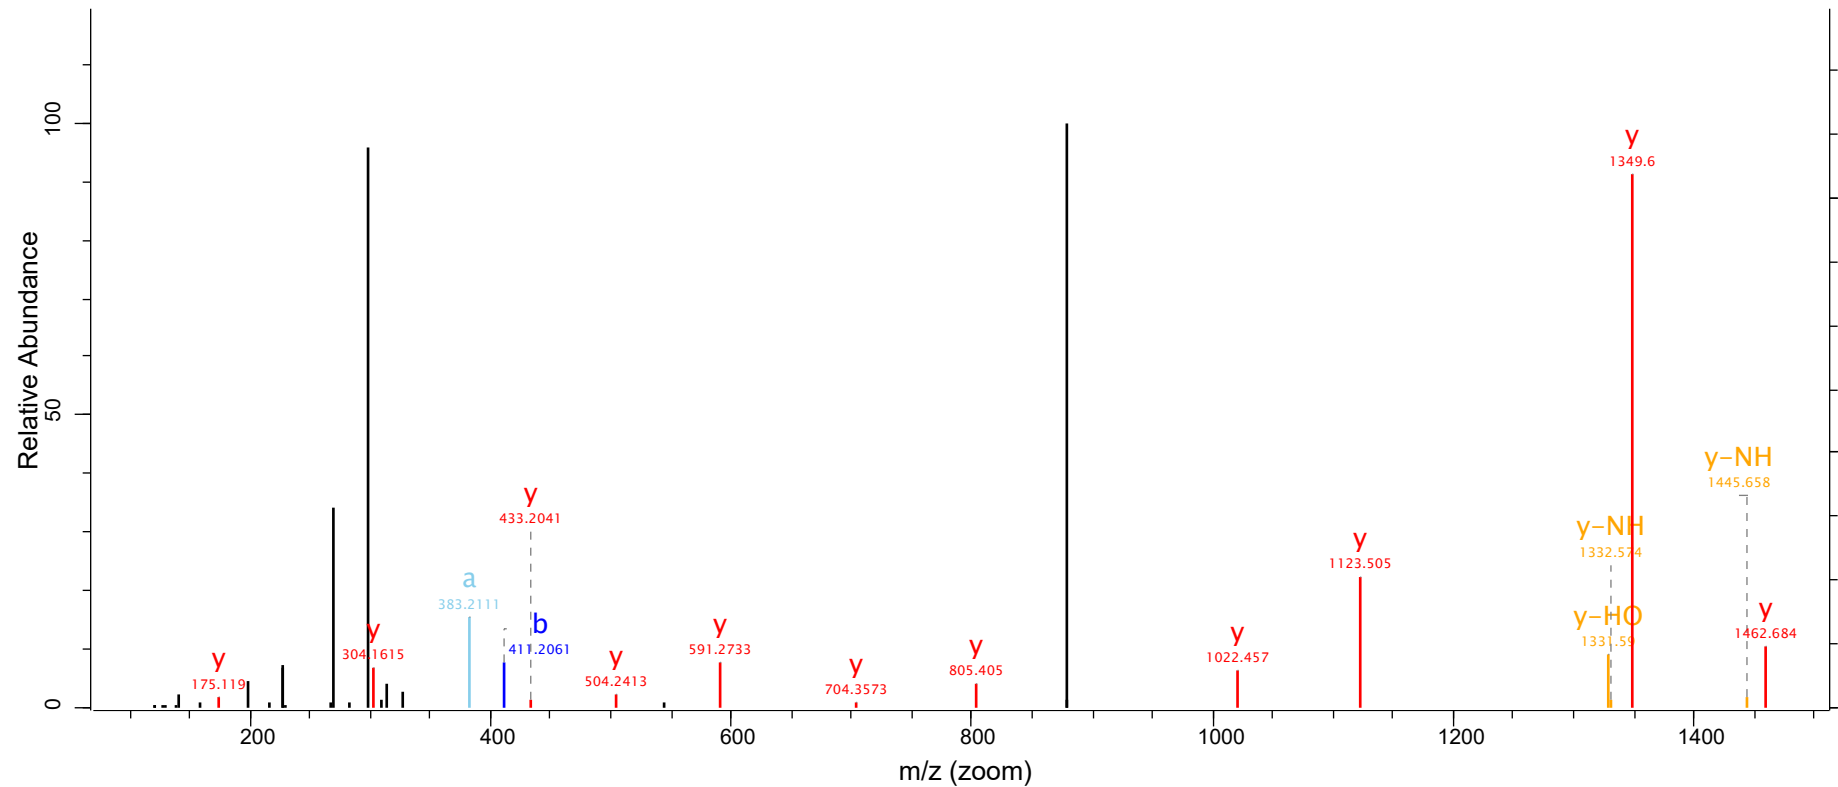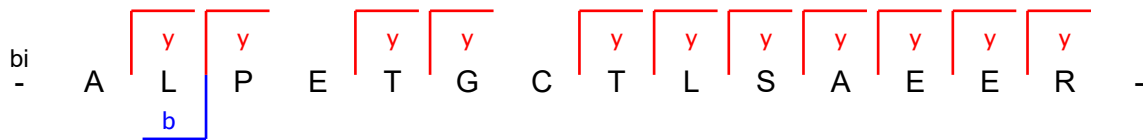

Raw File  
agg\_pep\_sort\_pos\_1

Scan  
17320

Method  
FTMS; HCD

Score  
42.32

m/z  
749.11

Gene names  
GNAQ

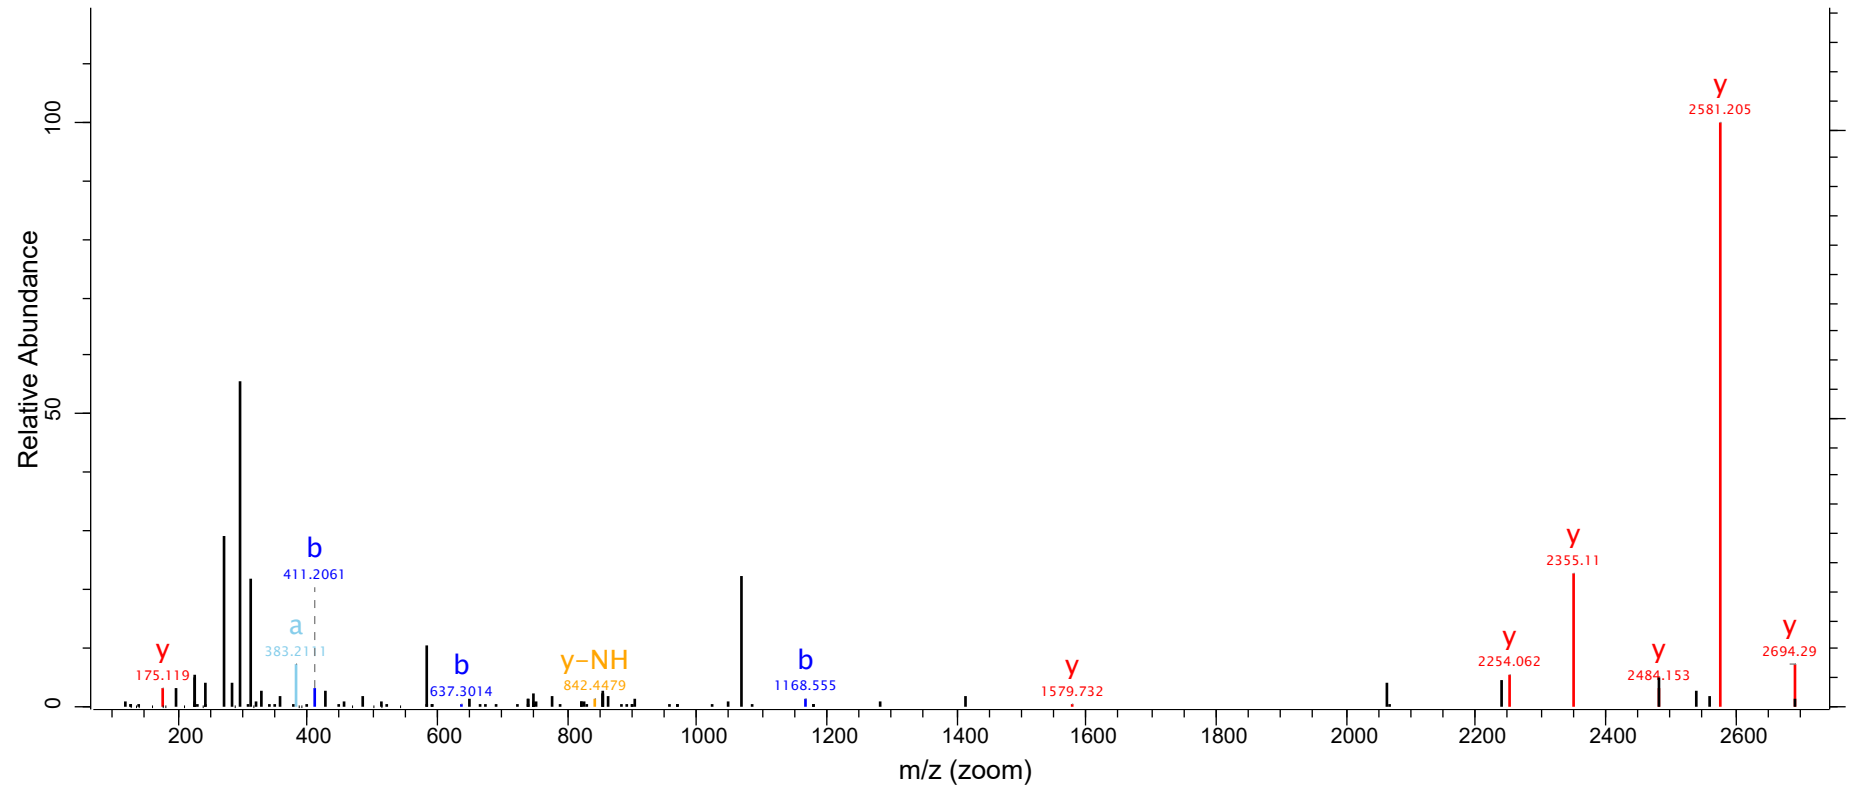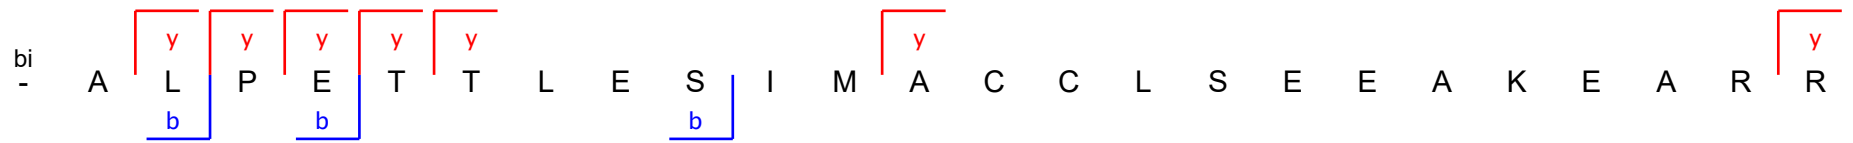

Raw File  
agg\_pep\_sort\_pos\_1

Scan  
13691

Method  
FTMS; HCD

Score  
118.52

m/z  
868.4

Gene names  
GNAS

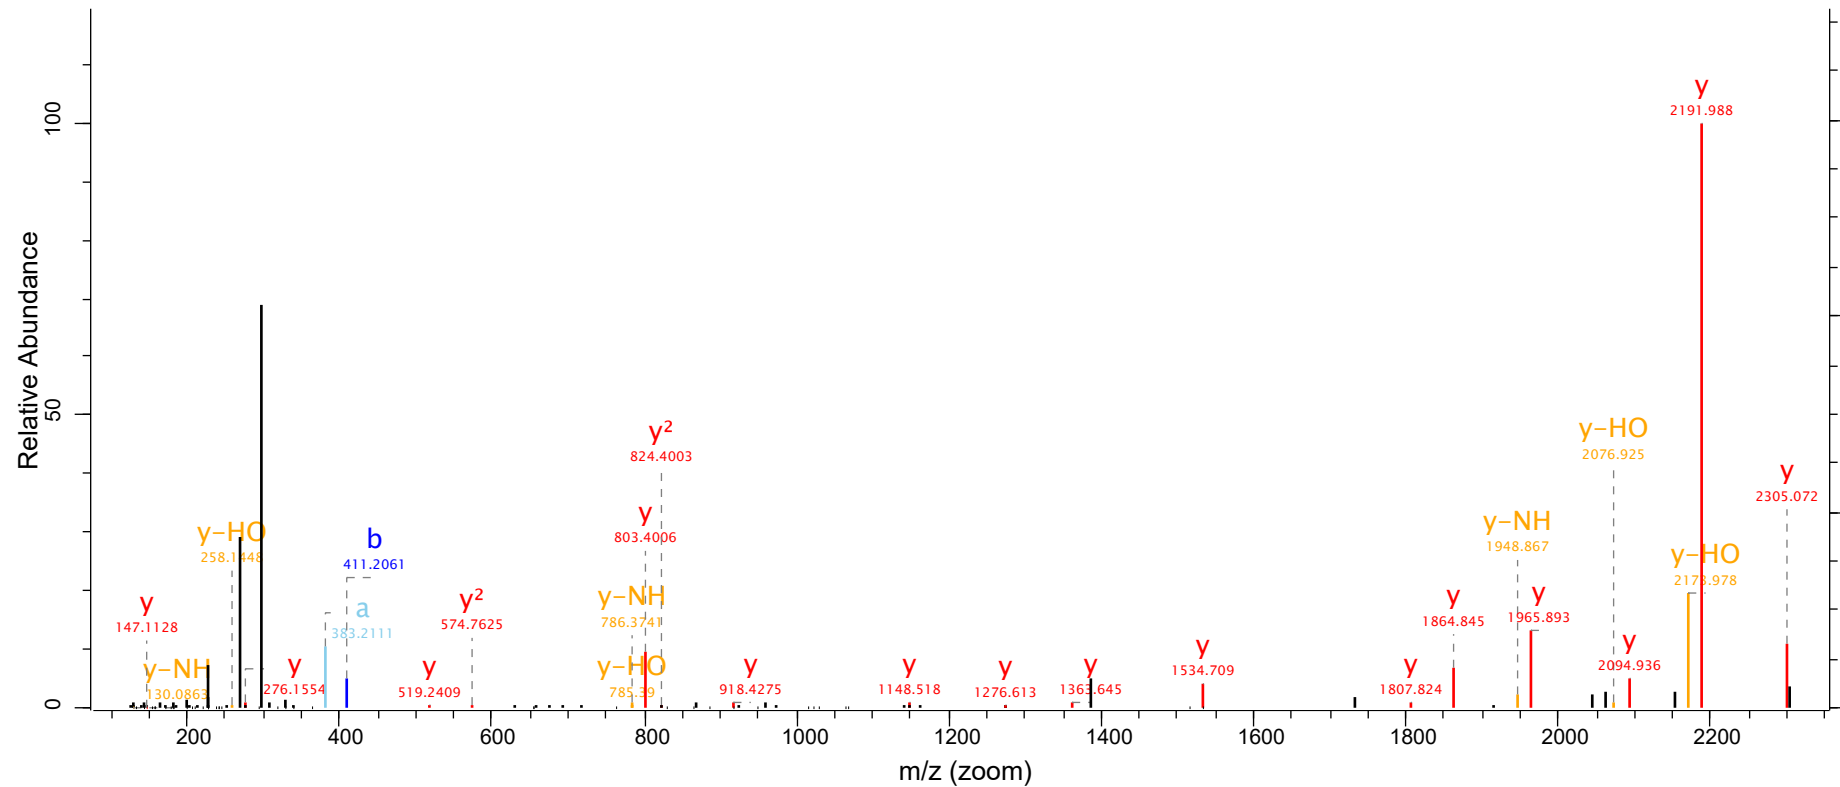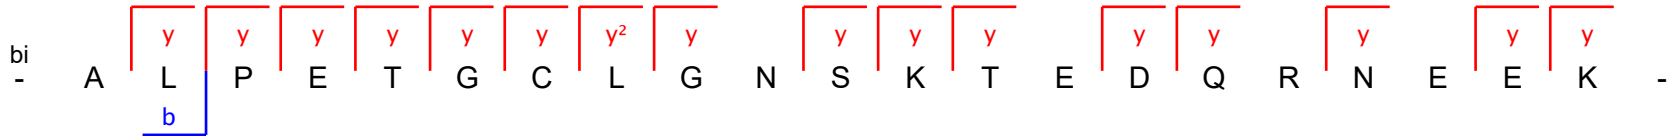



Raw File  
agg\_pep\_sort\_pos\_3

Scan  
16056

Method  
FTMS; HCD

Score  
98.51

m/z  
701.33

Gene names  
GNAS

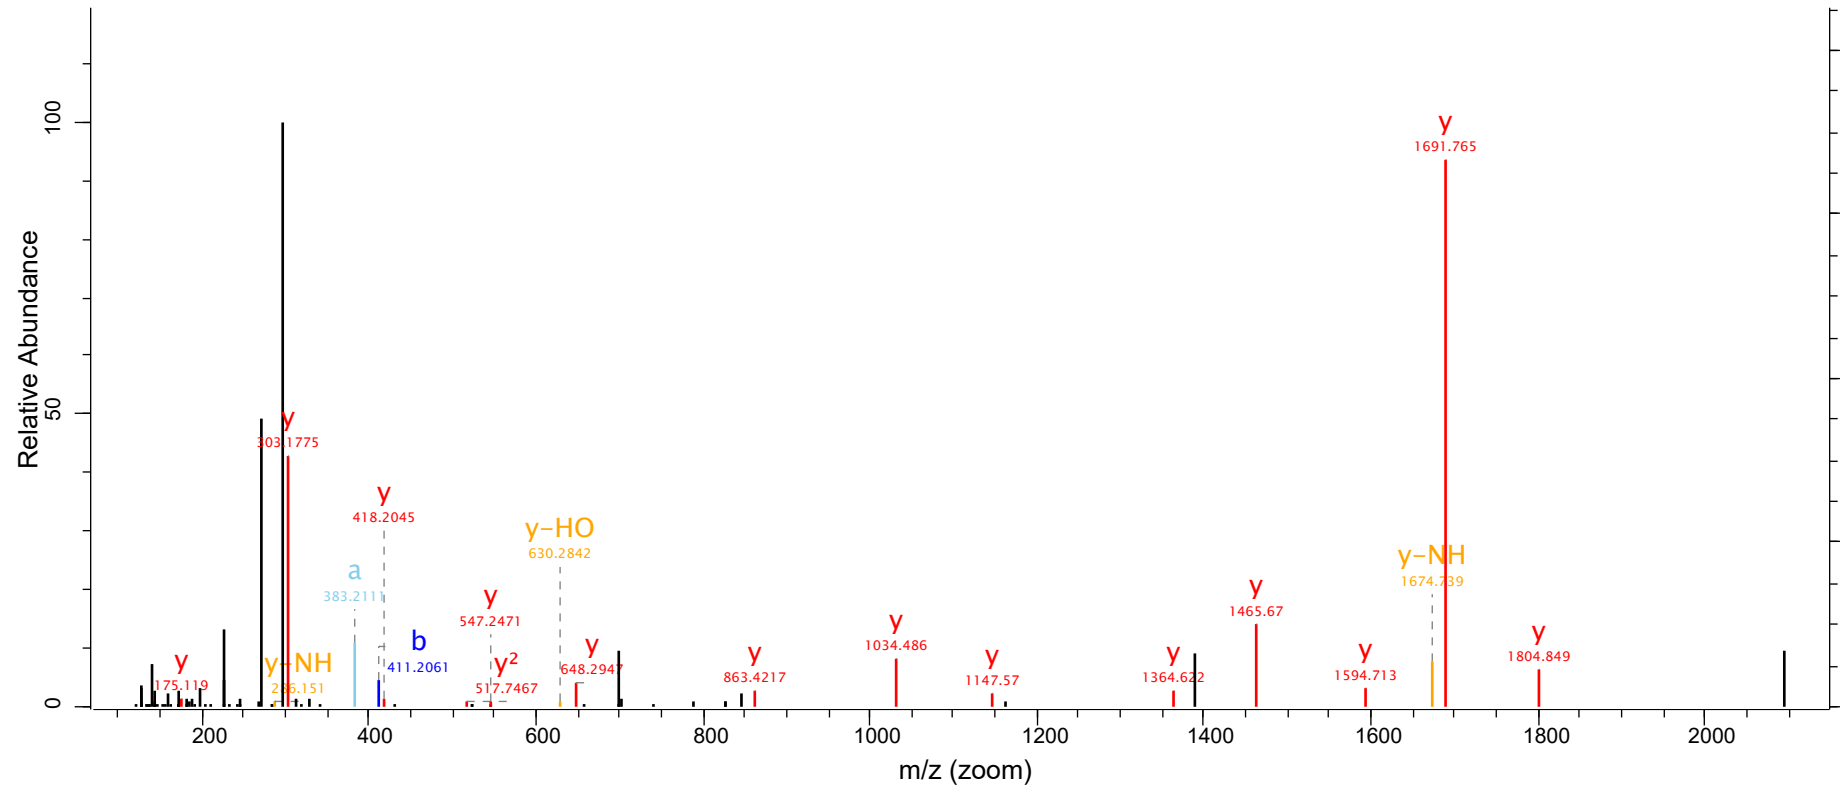

bi

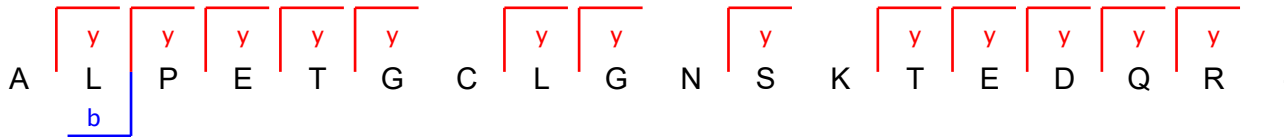

Raw File  
agg\_pep\_sort\_pos\_3

Scan  
19653

Method  
FTMS; HCD

Score  
88.06

m/z  
736.85

Gene names  
GNAS

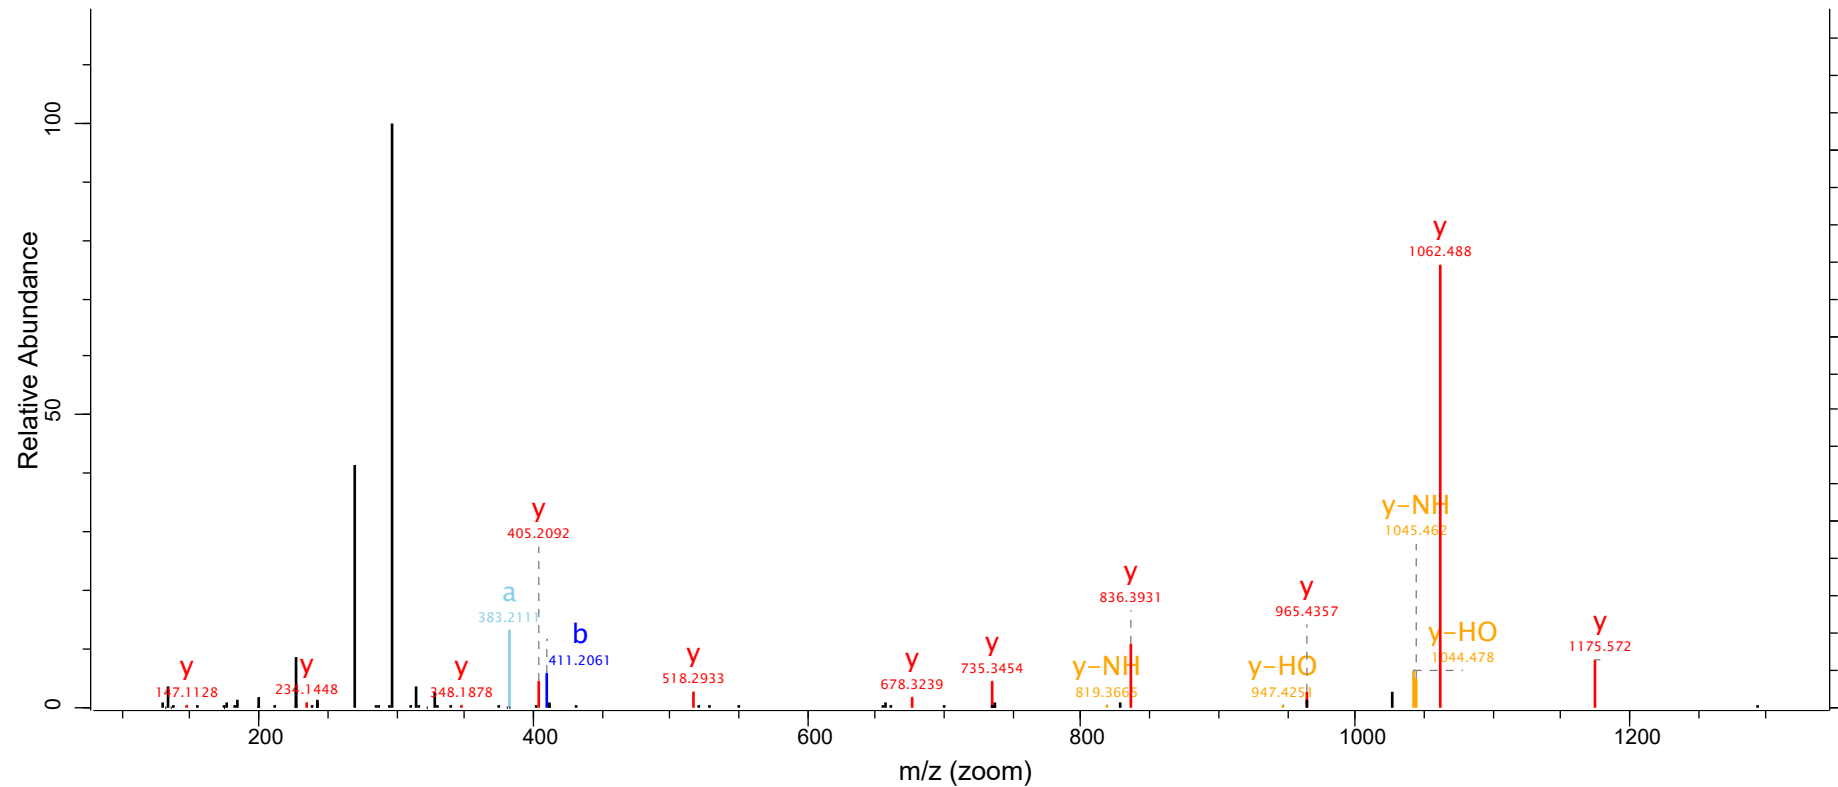

bi

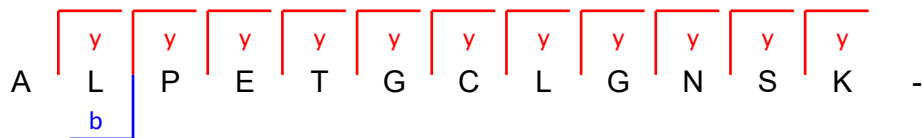

Raw File  
agg\_pep\_sort\_pos\_3

Scan  
21150

Method  
FTMS; HCD

Score  
86.79

m/z  
923.45

Gene names  
GORASP2

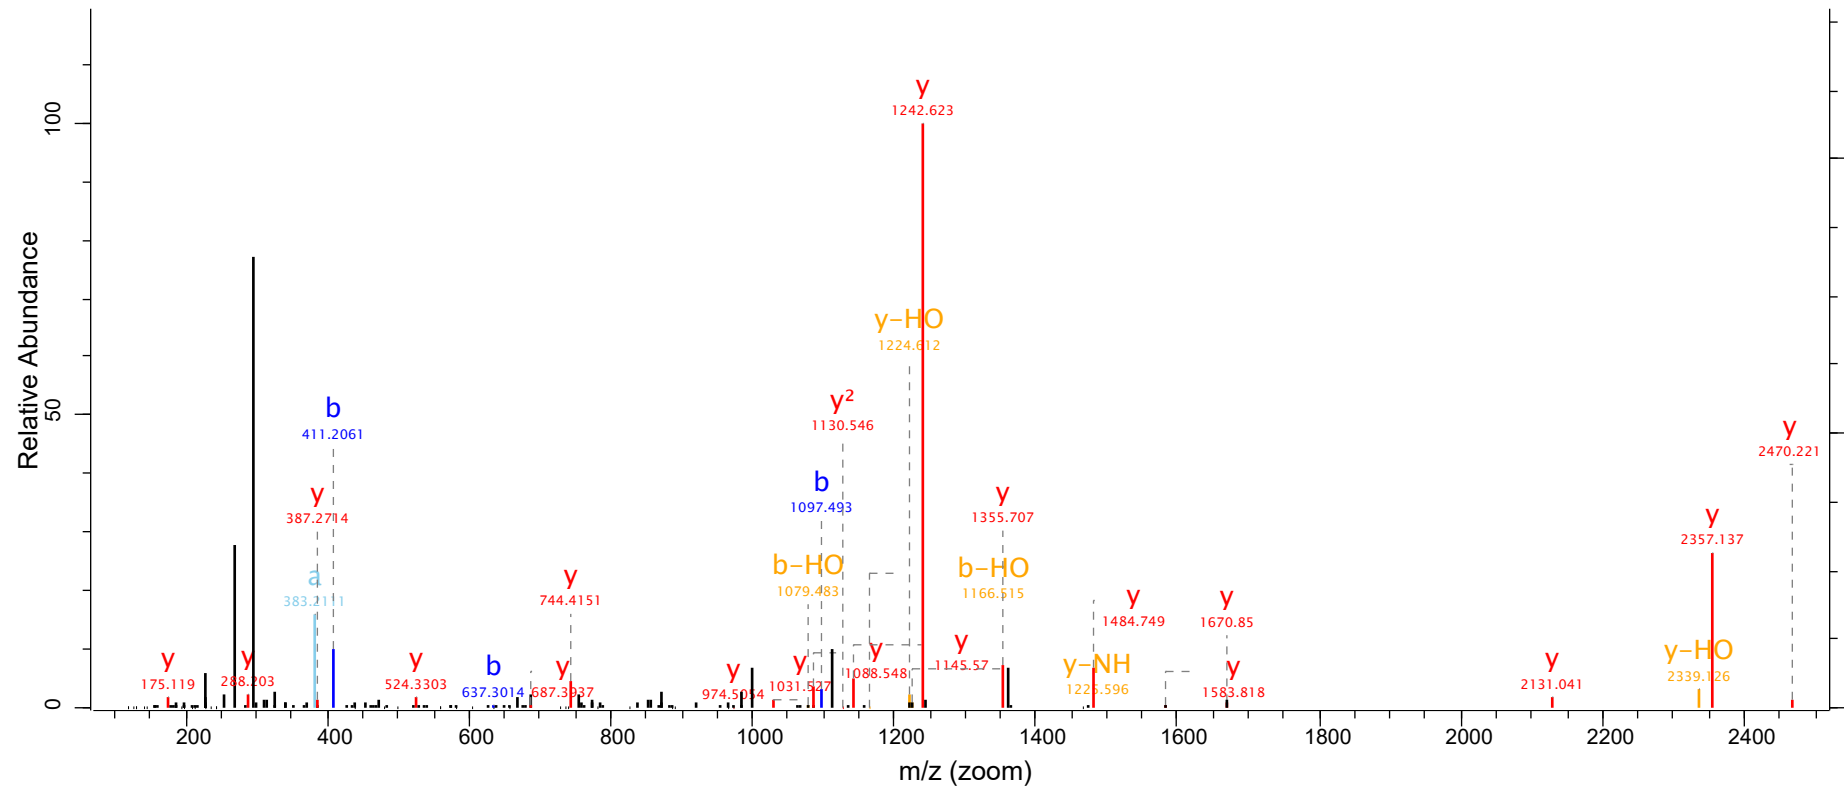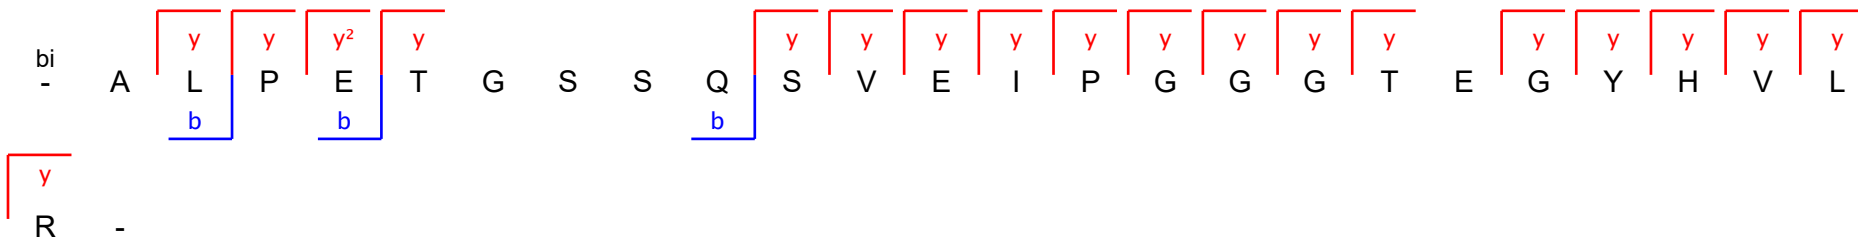

Raw File  
agg\_pep\_sort\_pos\_1

Scan  
17822

Method  
FTMS; HCD

Score  
82.54

m/z  
626.32

Gene names  
GPC5B

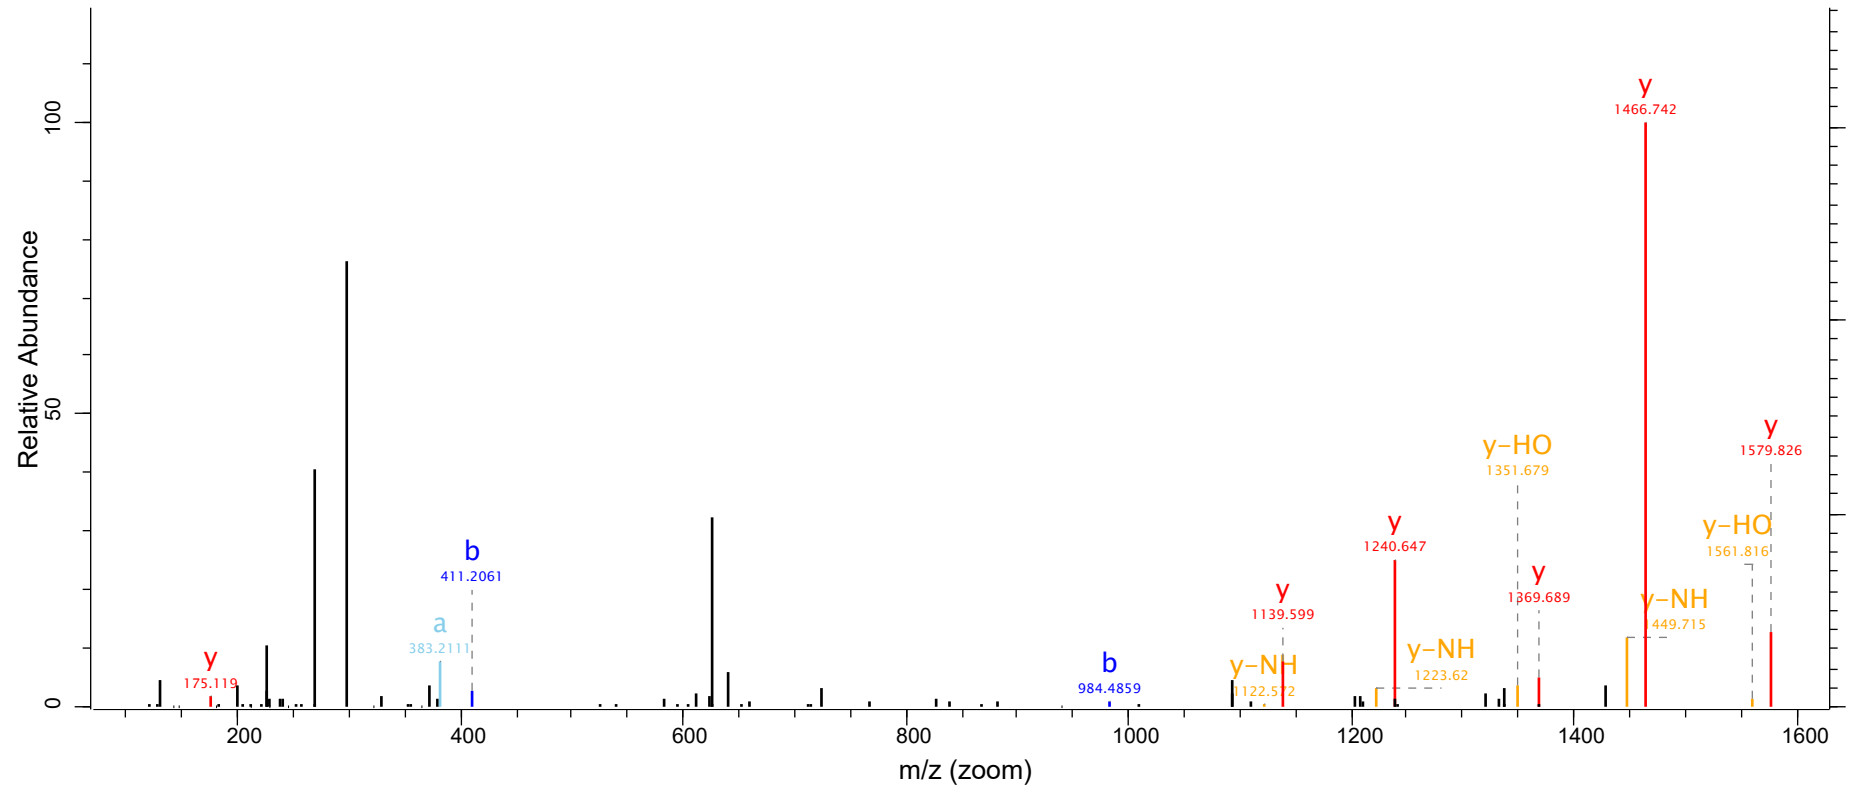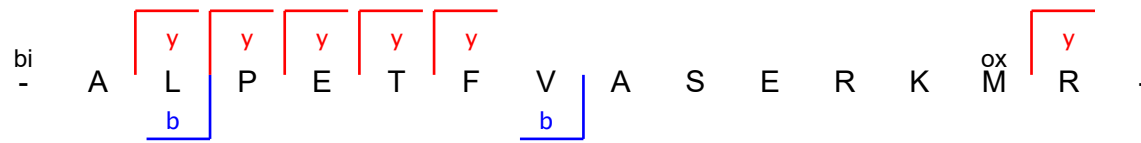

Raw File  
agg\_pep\_sort\_pos\_1

Scan  
17337

Method  
FTMS; HCD

Score  
83.21

m/z  
571.29

Gene names  
GSTZ1

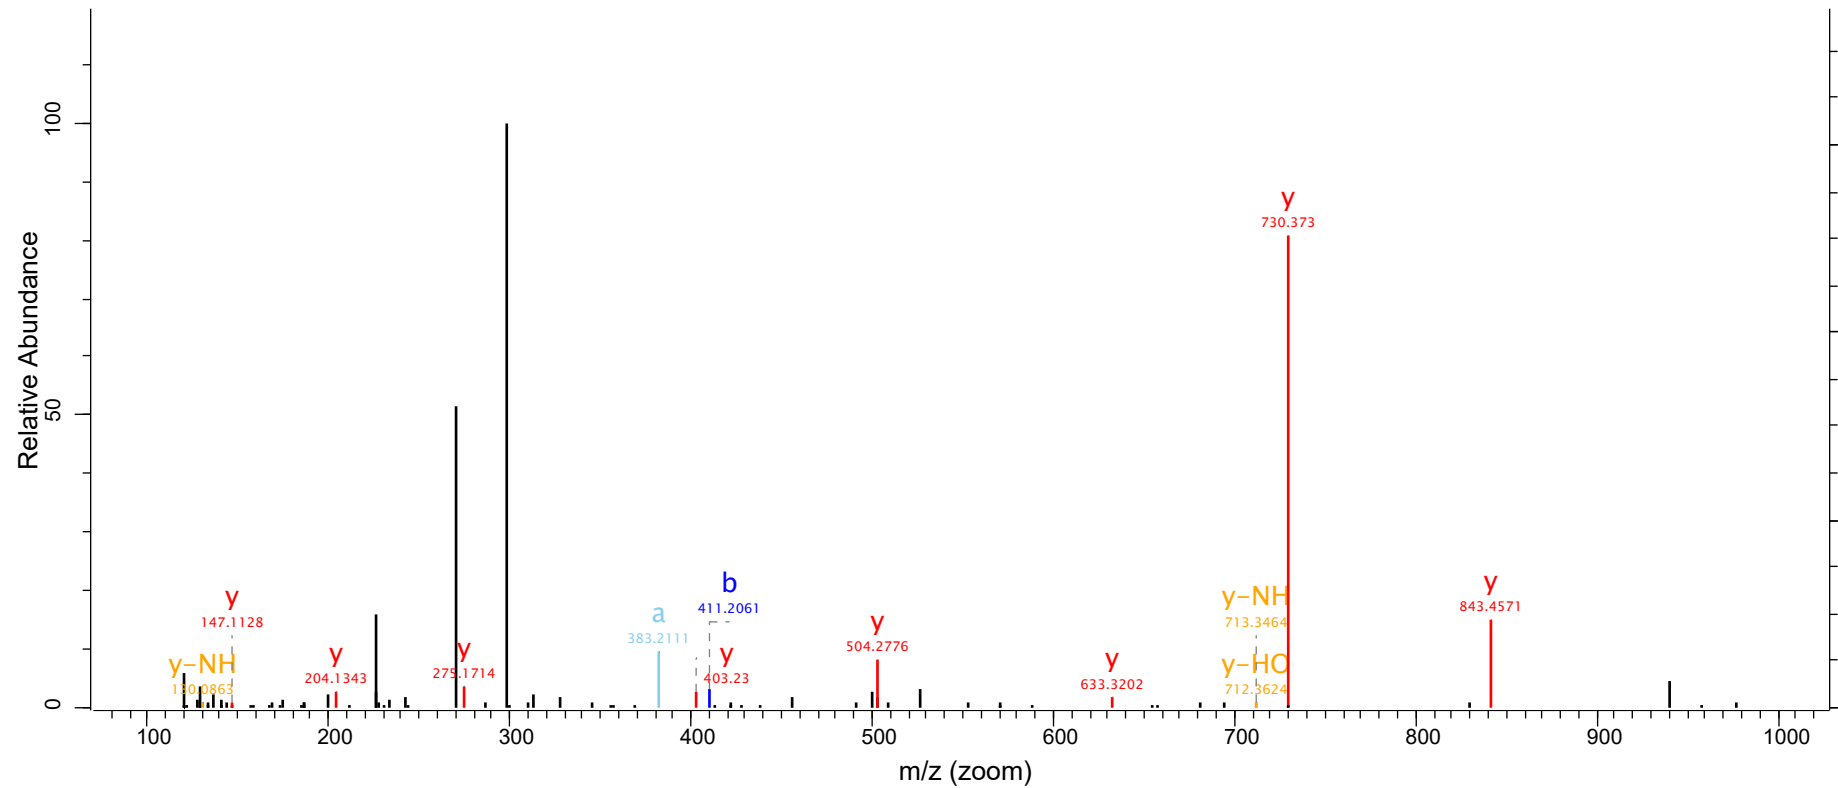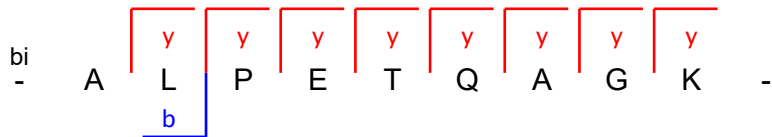

Raw File  
agg\_pep\_sort\_pos\_1

Scan  
18957

Method  
FTMS; HCD

Score  
44.81

m/z  
686.37

Gene names  
HACD4

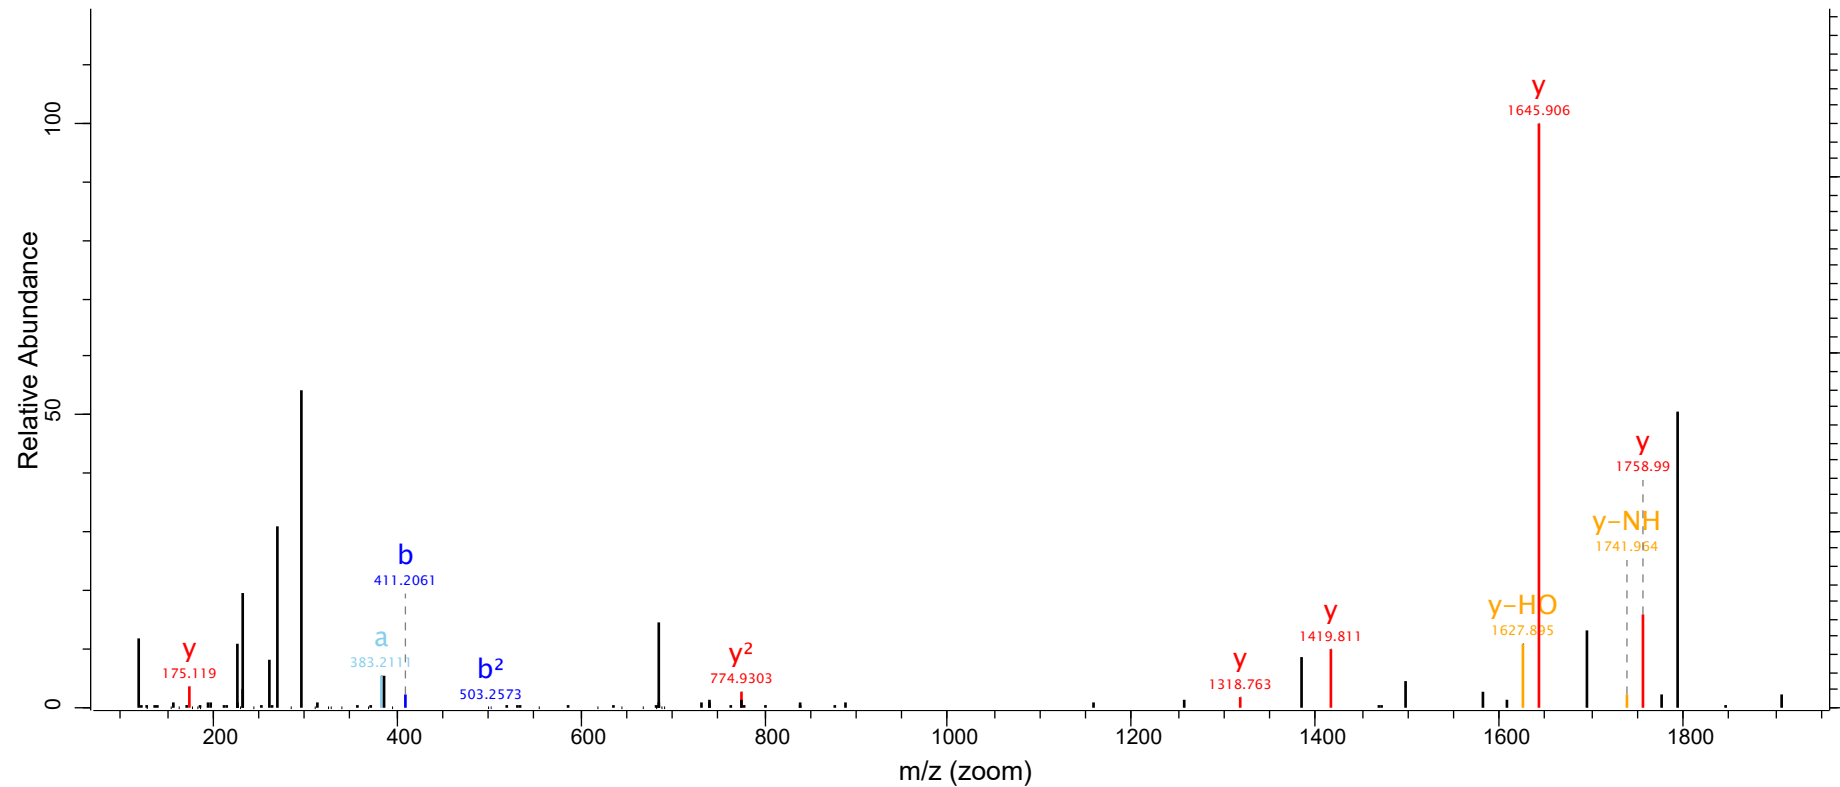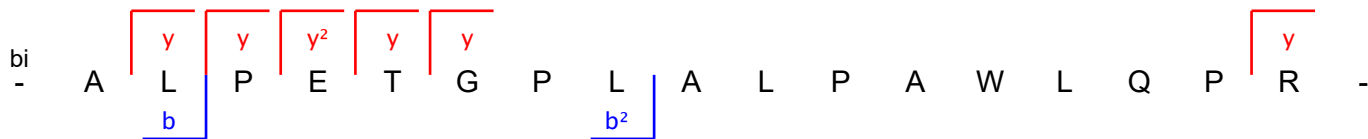

Raw File  
agg\_pep\_sort\_pos\_1

Scan  
21429

Method  
FTMS; HCD

Score  
65.78

m/z  
912.77

Gene names  
HGHI

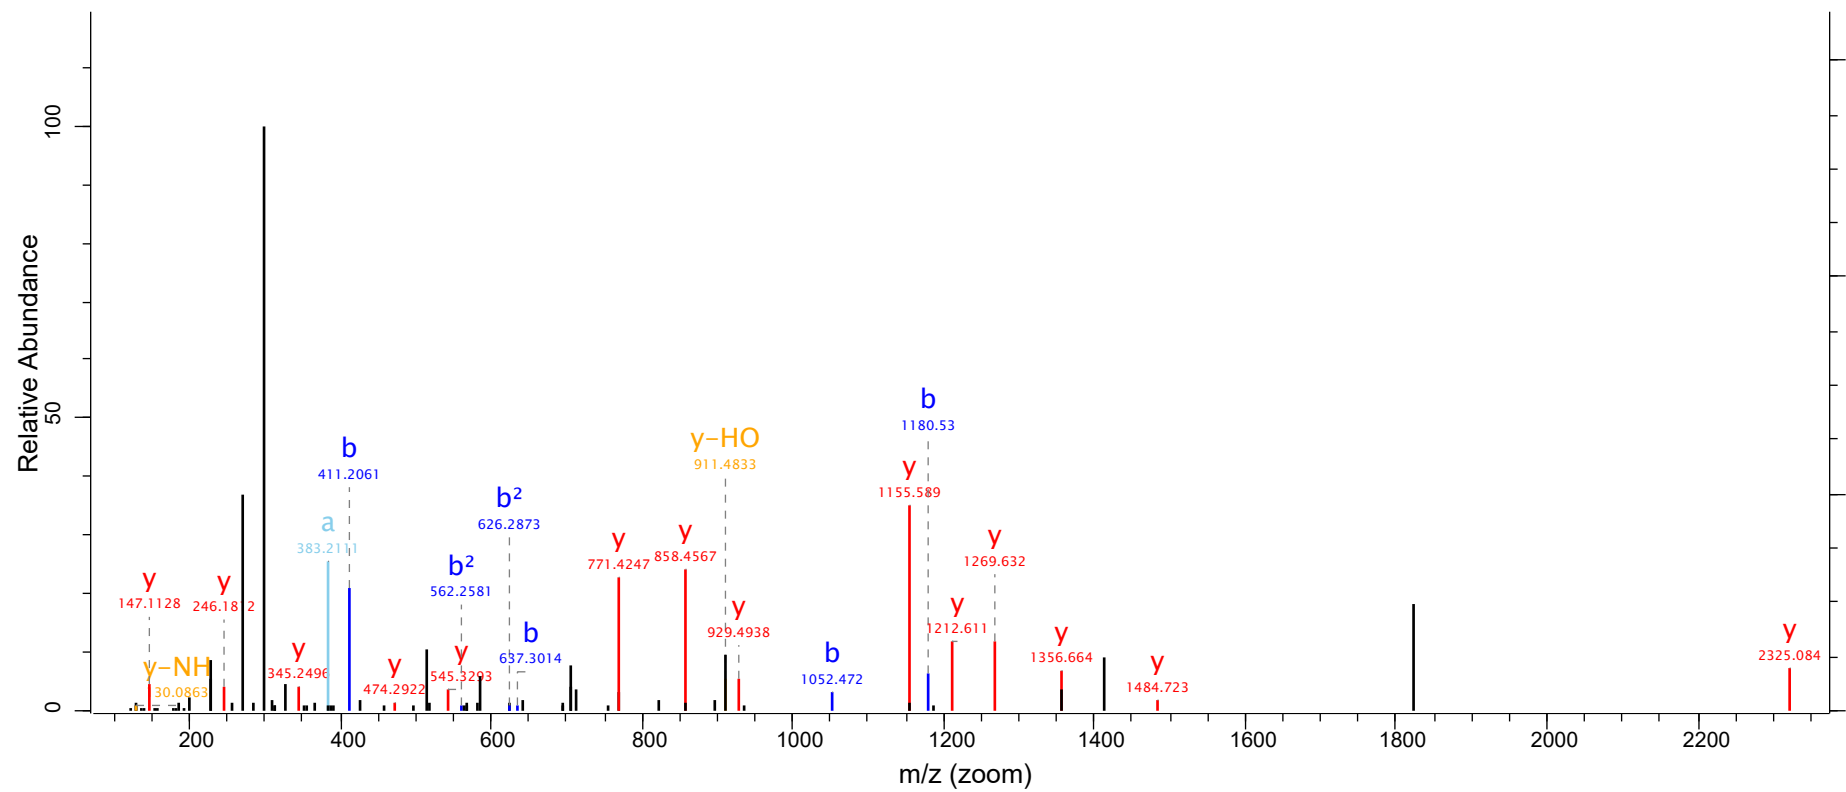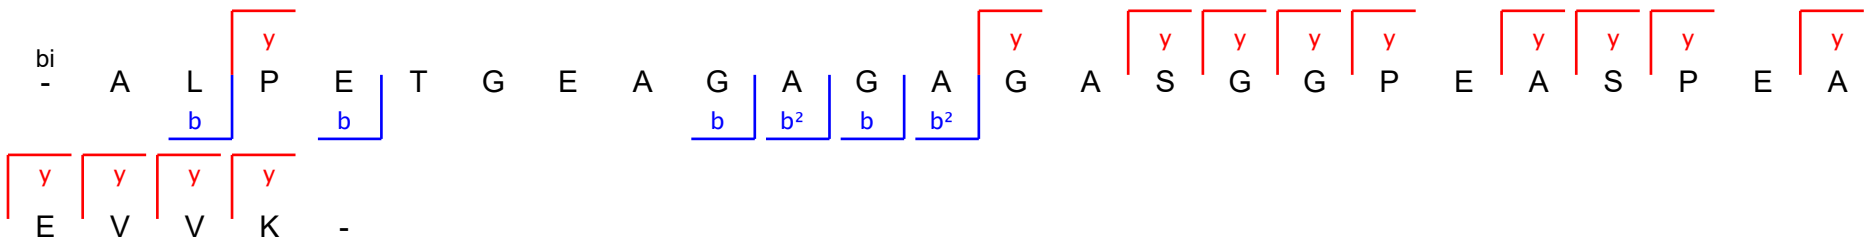

Raw File  
agg\_pep\_sort\_pos\_2

Scan  
14609

Method  
FTMS; HCD

Score  
55.4

m/z  
915.98

Gene names  
HIST2H2BE; HIST1H2BC; H2BFS; HIST1H2BJ; HIST1H2BK

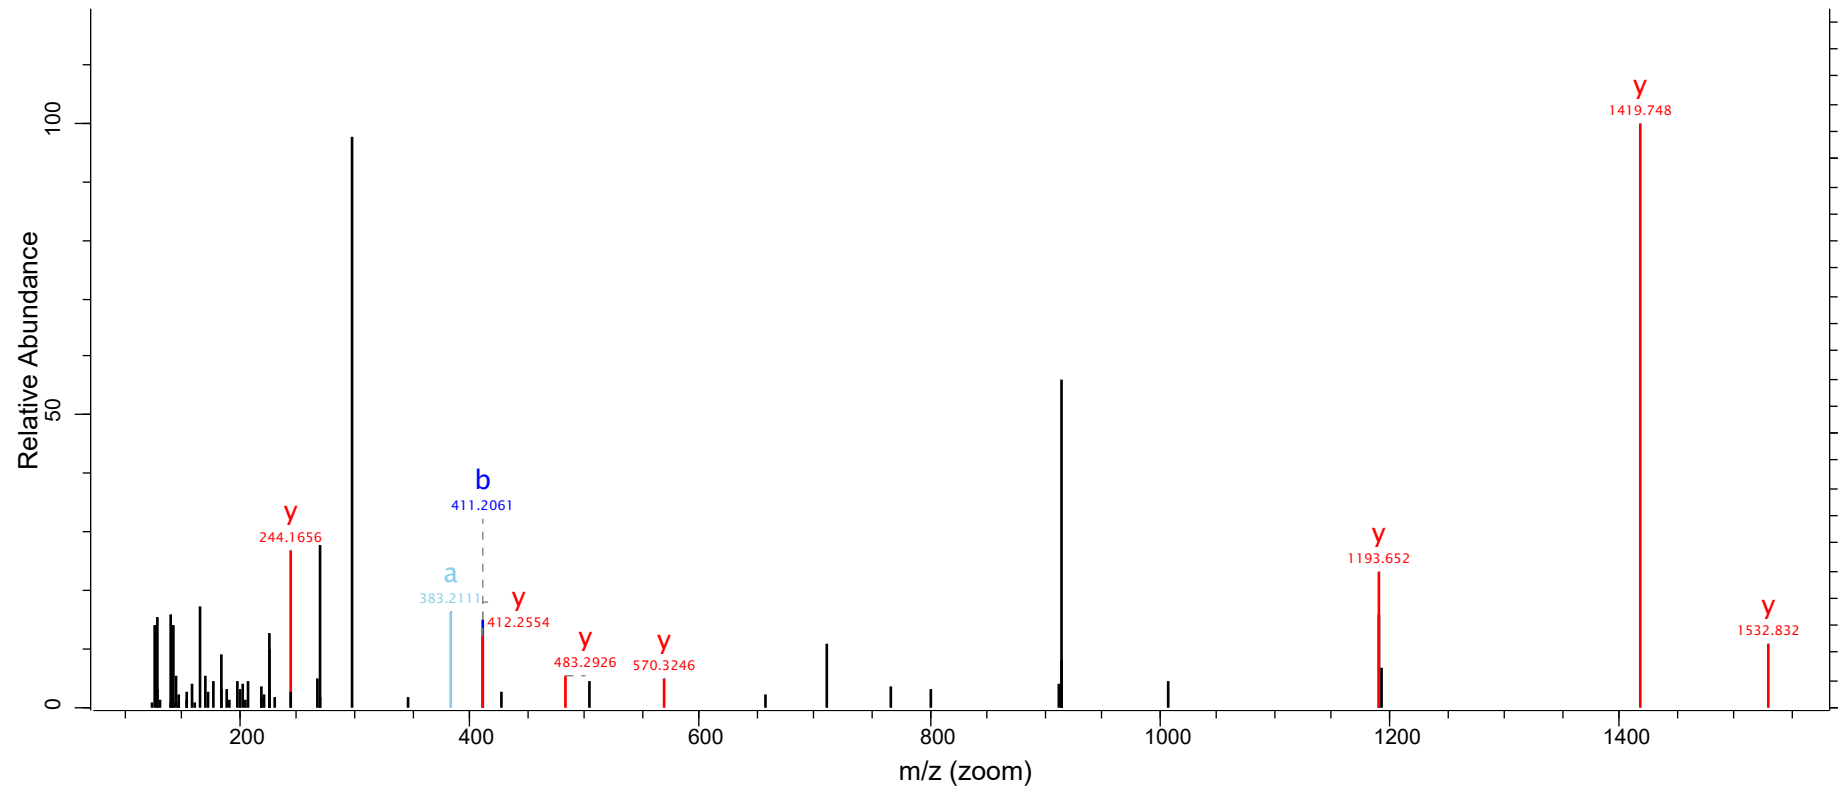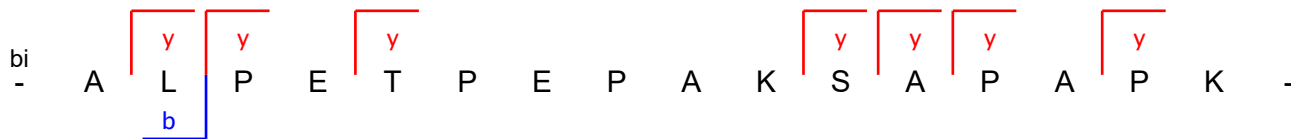



Raw File  
agg\_pep\_sort\_pos\_2

Scan  
12260

Method  
FTMS; HCD

Score  
99.82

m/z  
669.84

Gene names  
HMGB1;HMGB1P1

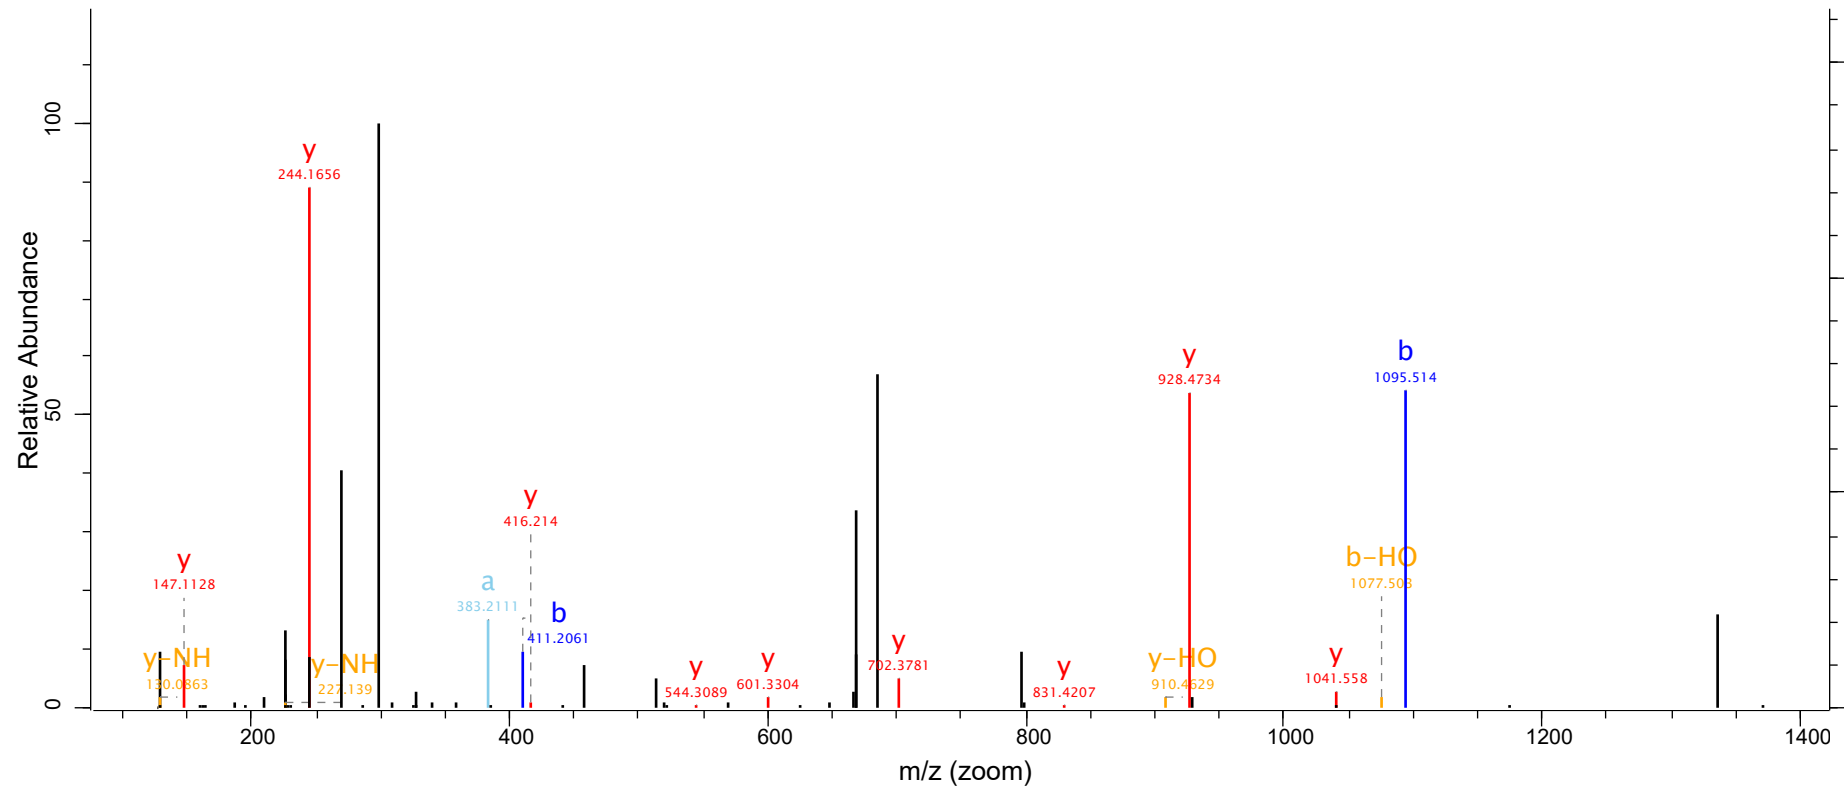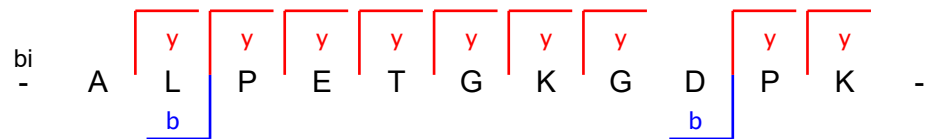

Raw File  
agg\_pep\_sort\_pos\_1

Scan  
10291

Method  
FTMS; HCD

Score  
143.98

m/z  
569.3

Gene names  
HMGB2

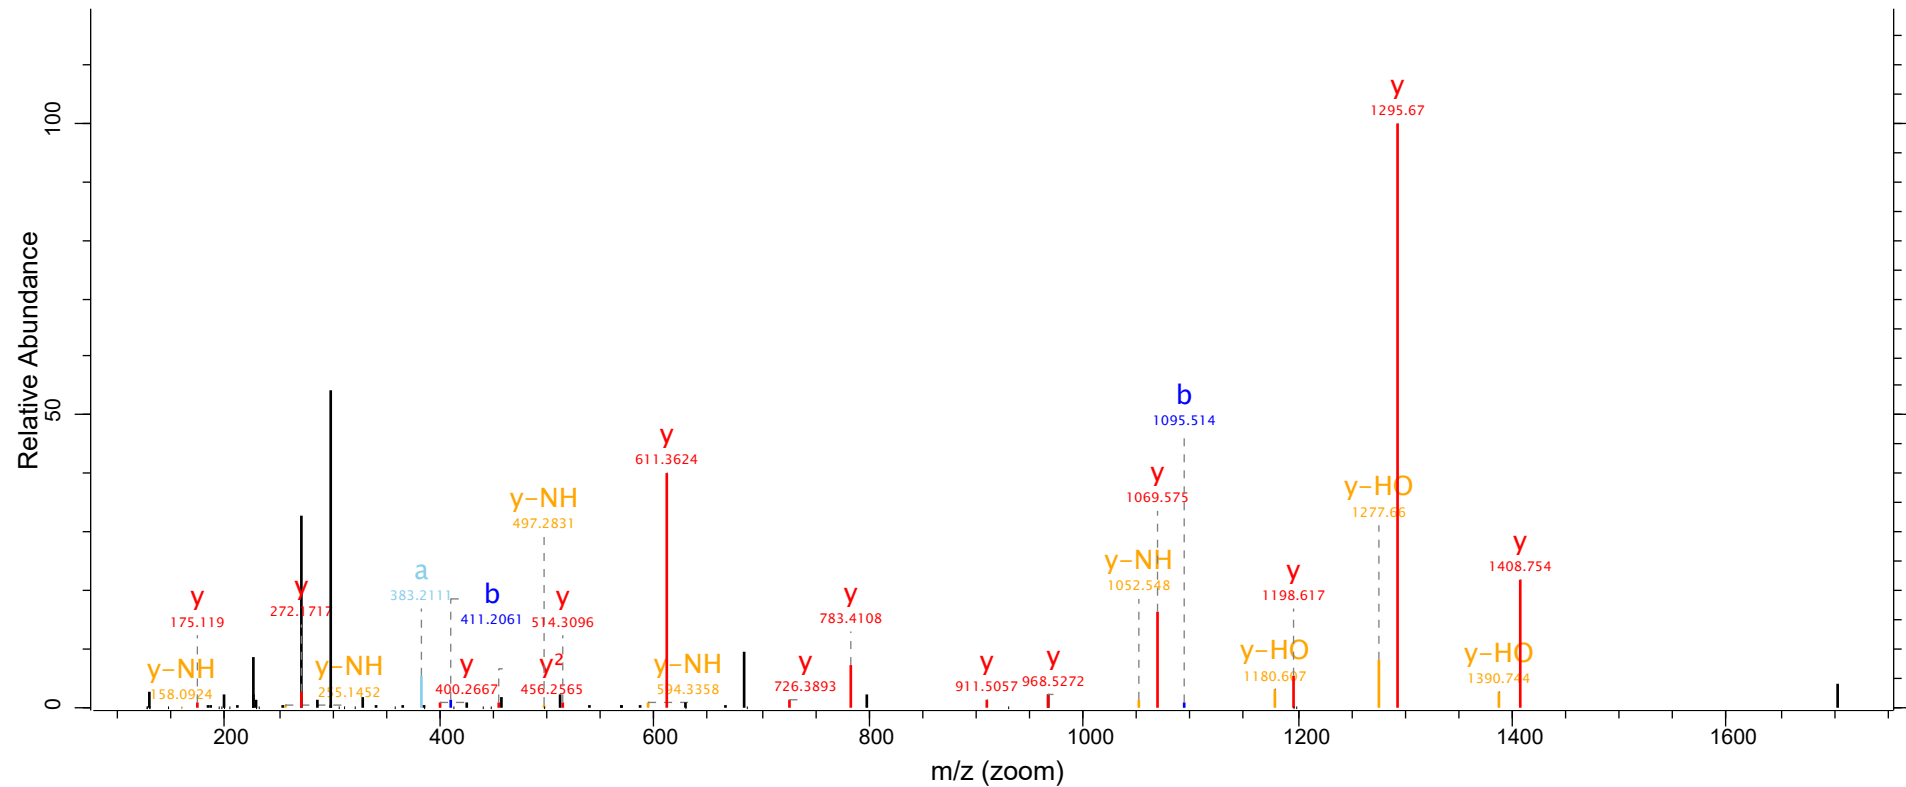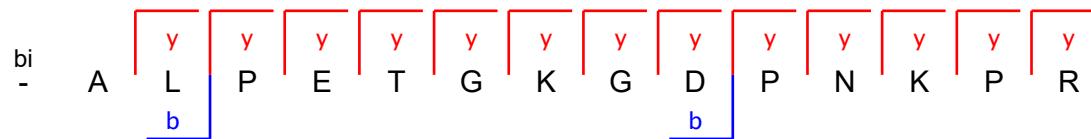

Raw File  
agg\_pep\_sort\_pos\_3

Scan  
13735

Method  
FTMS; HCD

Score  
84.21

m/z  
697.37

Gene names  
IRF3

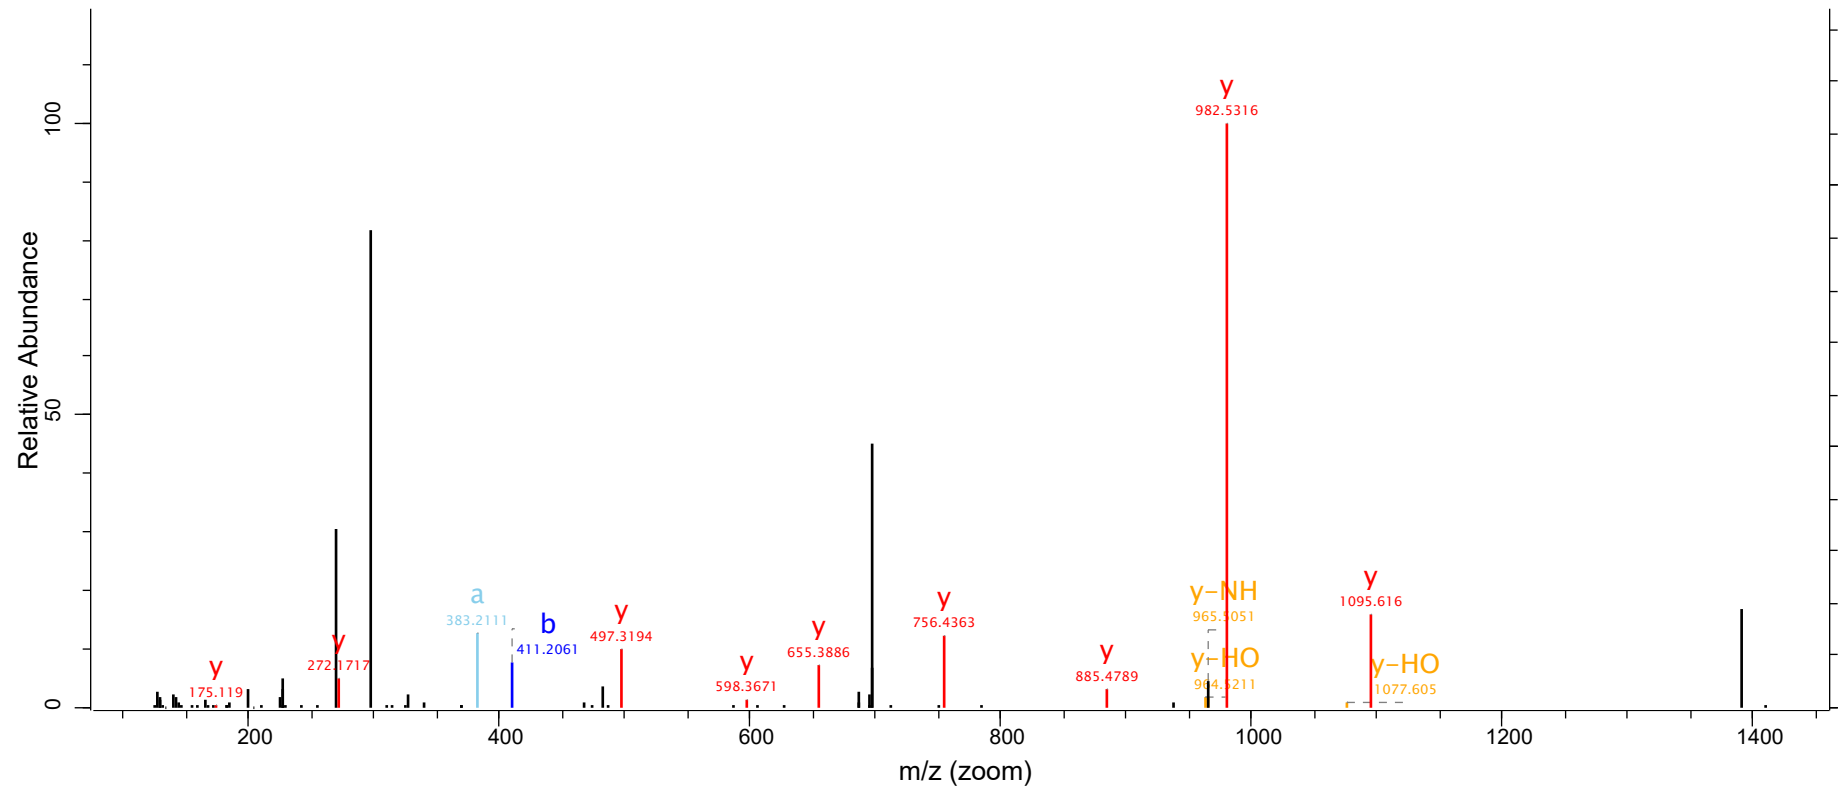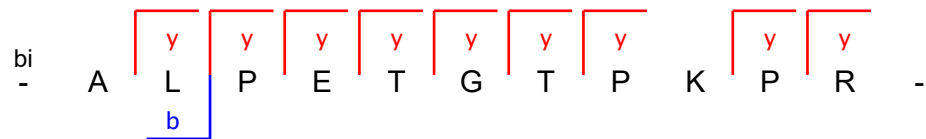

Raw File  
agg\_pep\_sort\_pos\_3

Scan  
13392

Method  
FTMS; HCD

Score  
66.38

m/z  
724.1

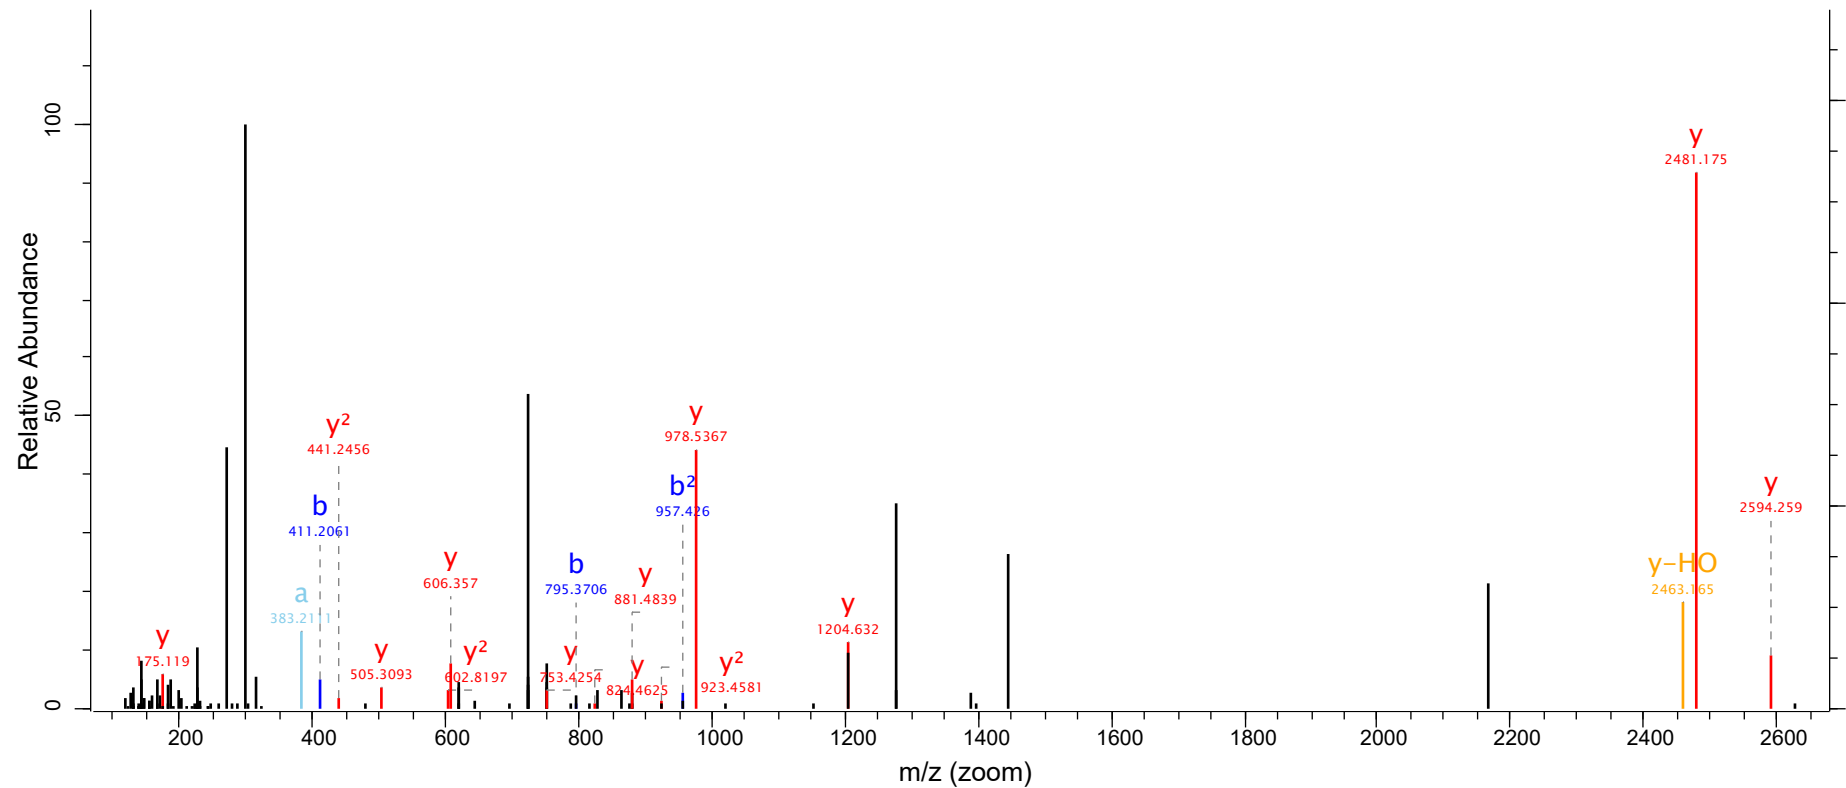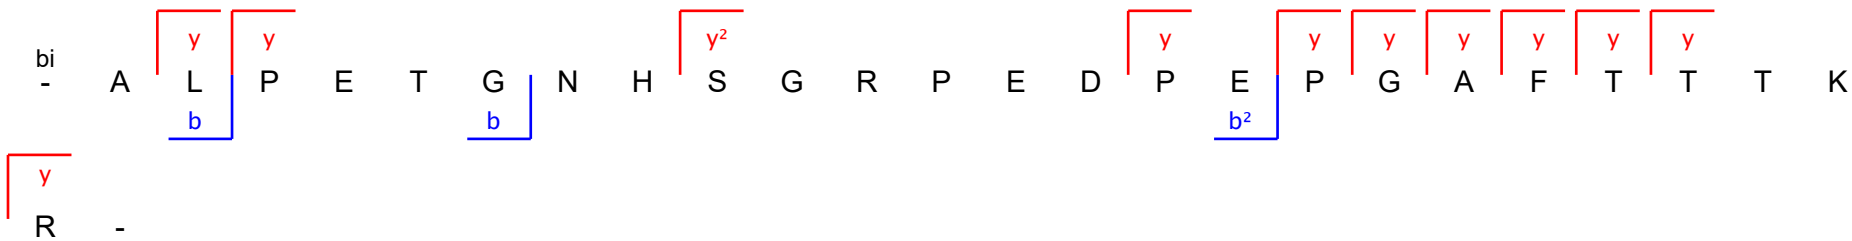

Raw File  
agg\_pep\_sort\_pos\_1

Scan  
20266

Method  
FTMS; HCD

Score  
92.06

m/z  
705.86

Gene names  
KIF7

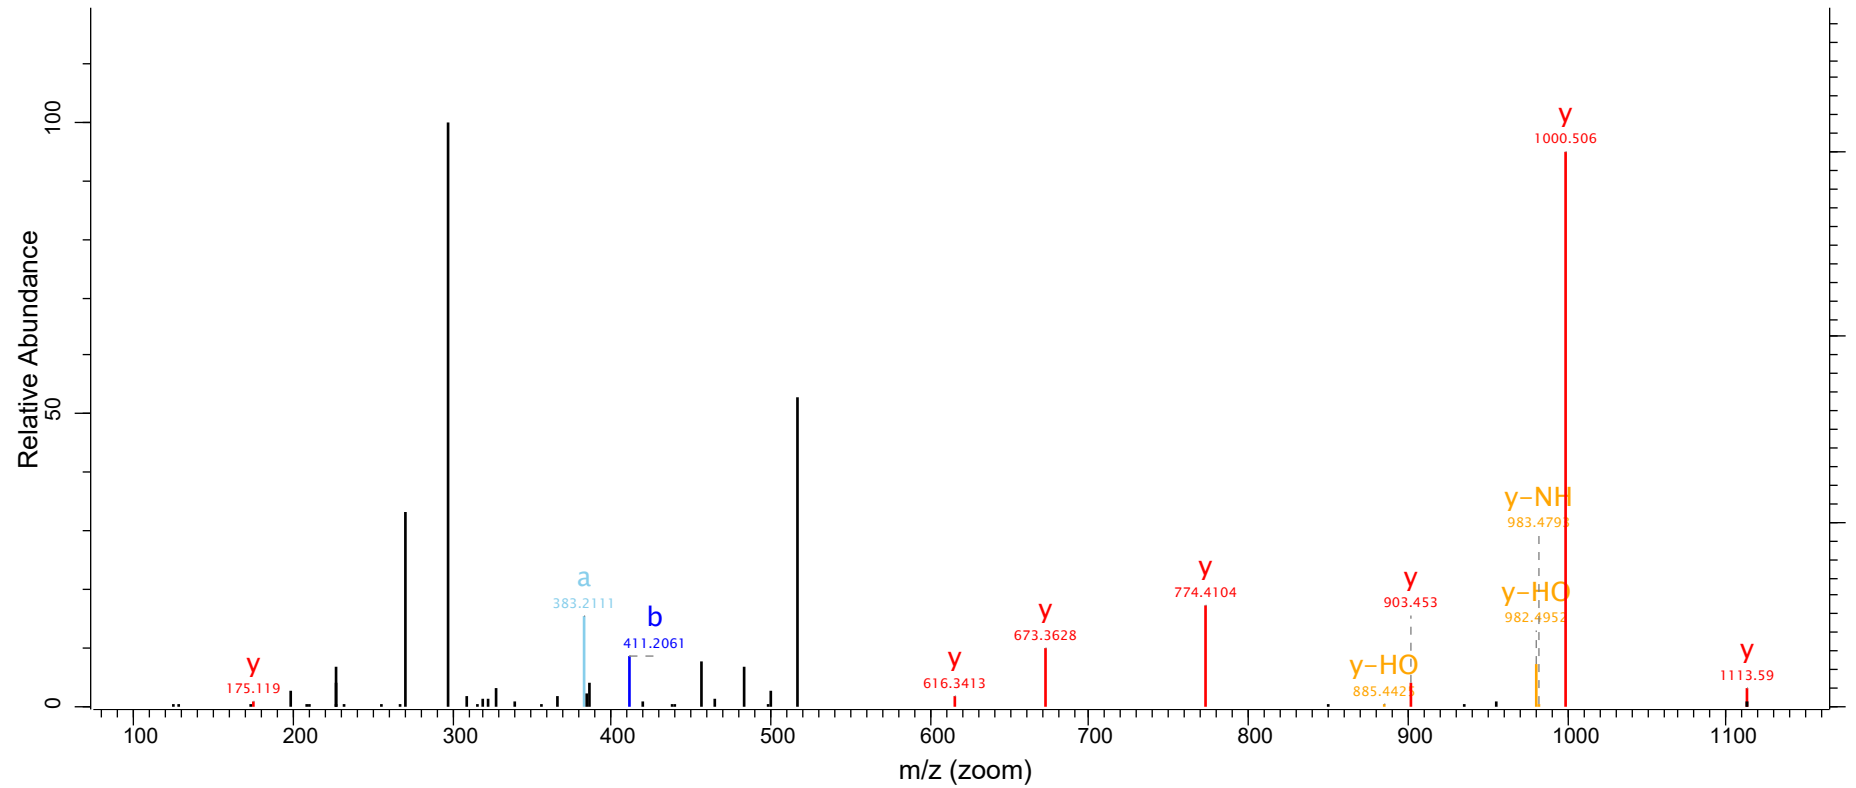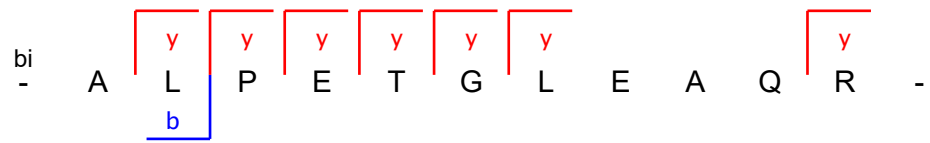

Raw File  
agg\_pep\_sort\_pos\_2

Scan  
20986

Method  
FTMS; HCD

Score  
78.67

m/z  
811.09

Gene names  
KIF7

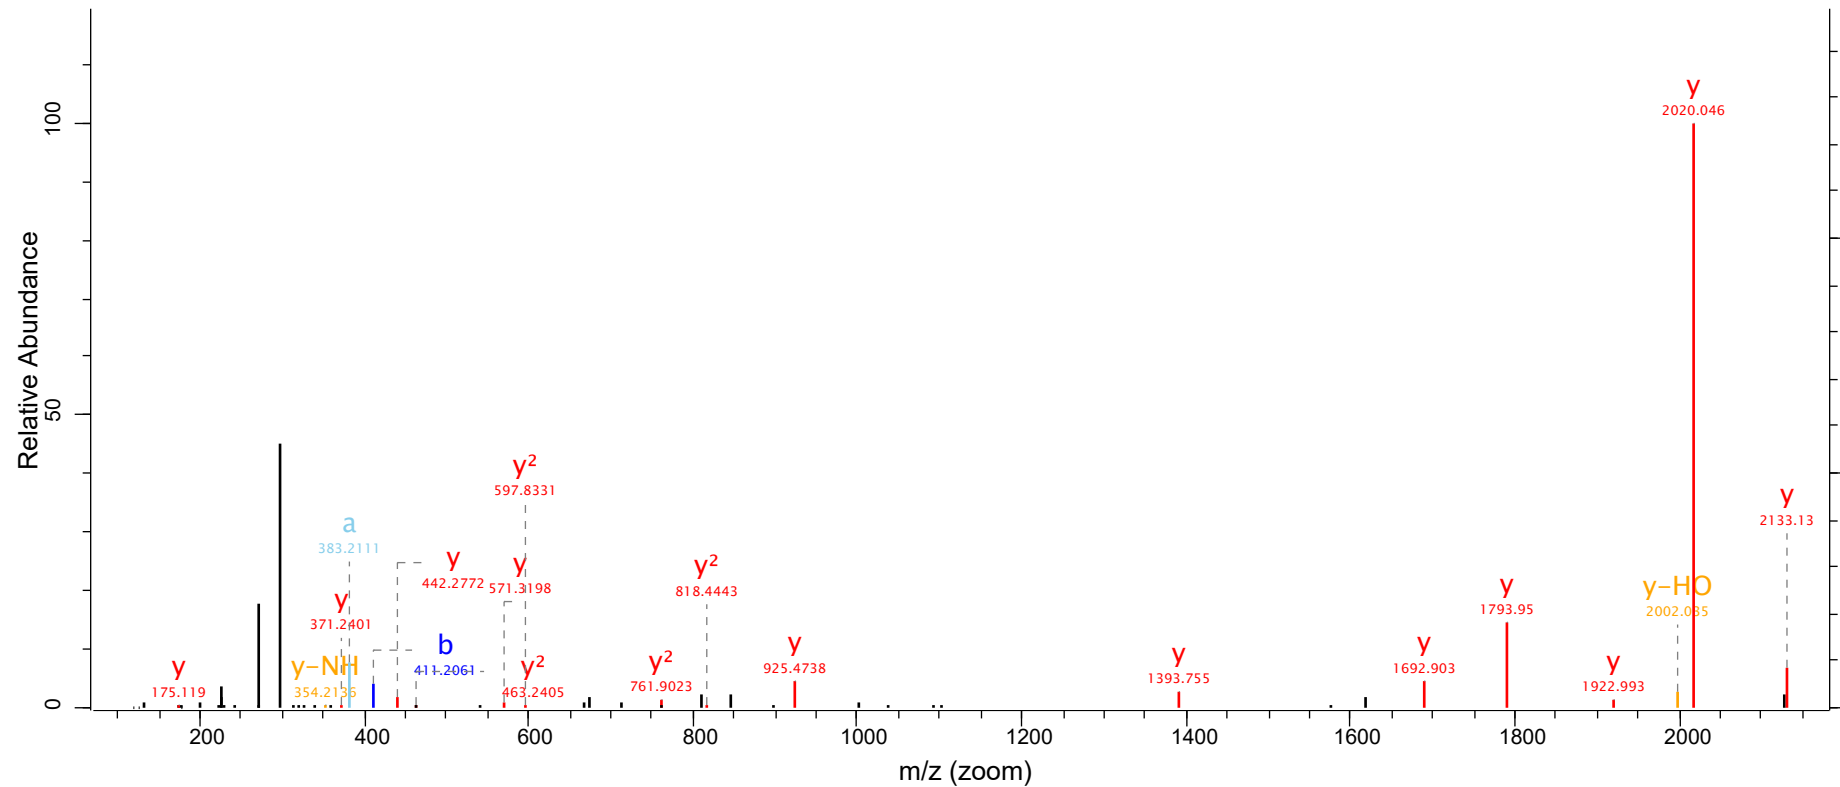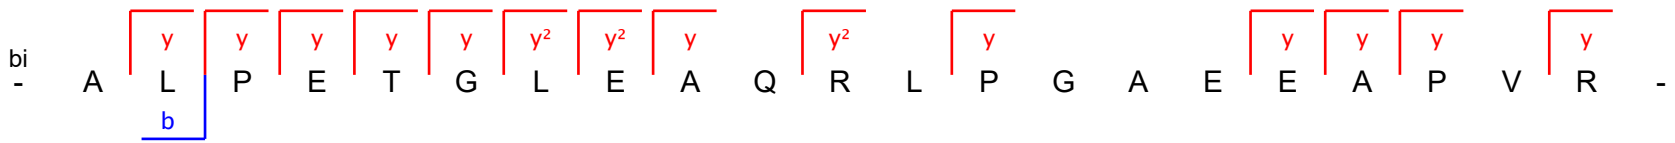

Raw File  
agg\_pep\_sort\_pos\_2

Scan  
19811

Method  
FTMS; HCD

Score  
117.09

m/z  
865.44

Gene names  
KIN

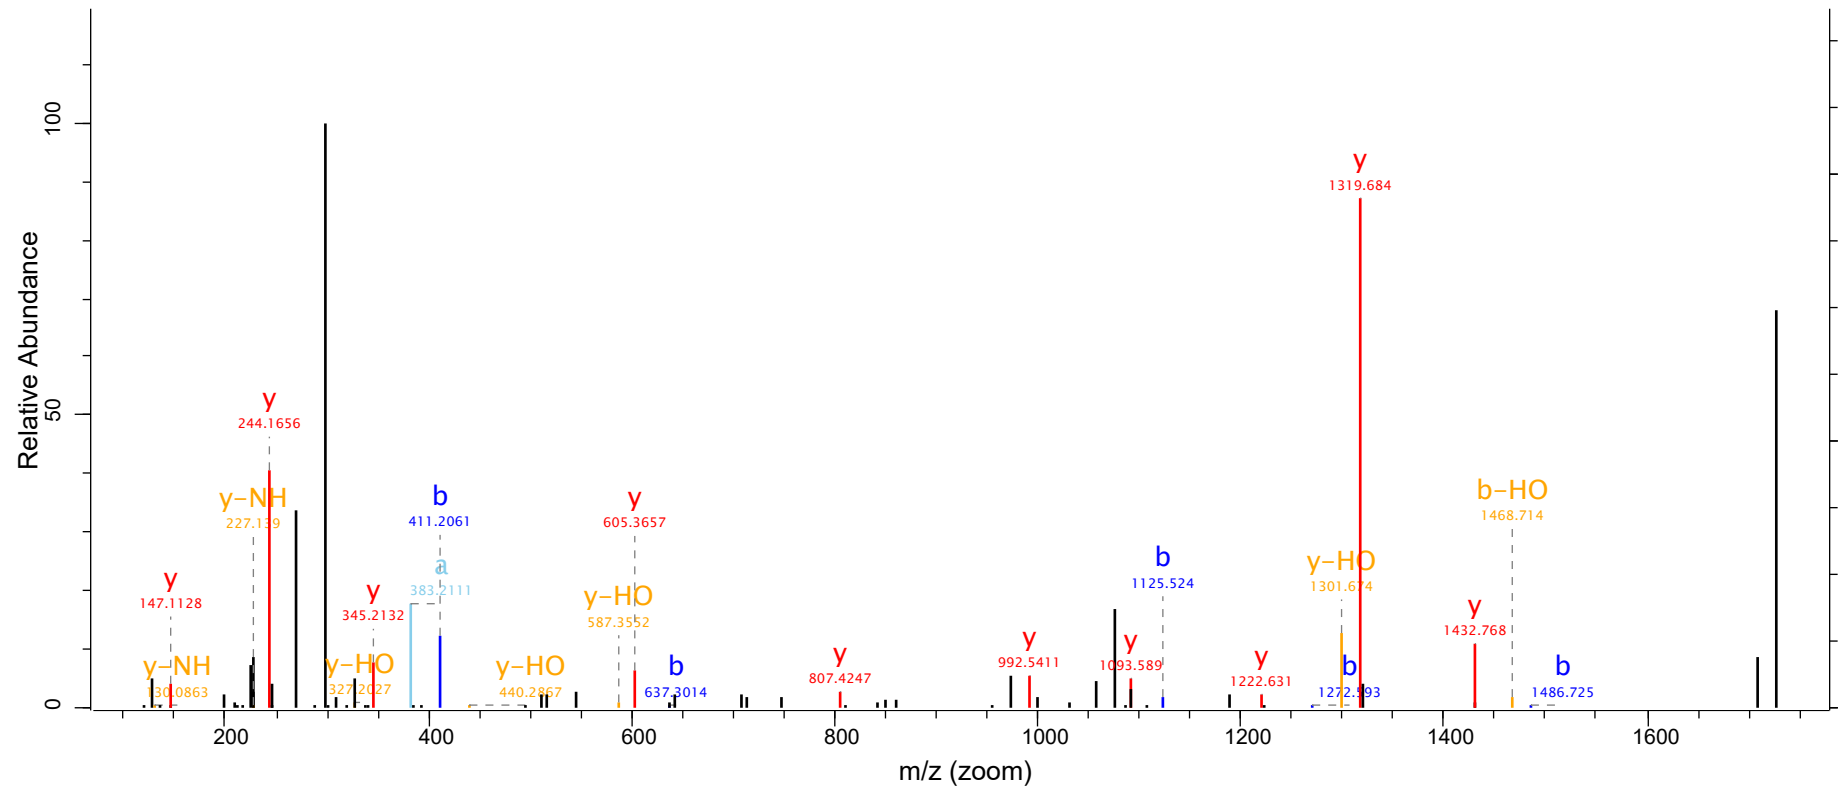

bi

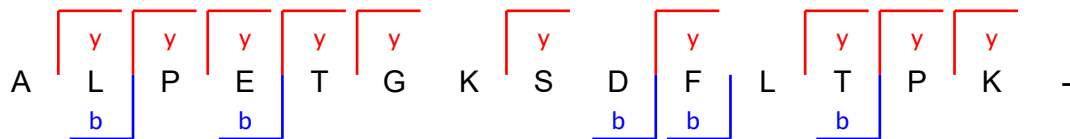

Raw File  
agg\_pep\_sort\_pos\_3

Scan  
23228

Method  
FTMS; HCD

Score  
61.35

m/z  
829.91

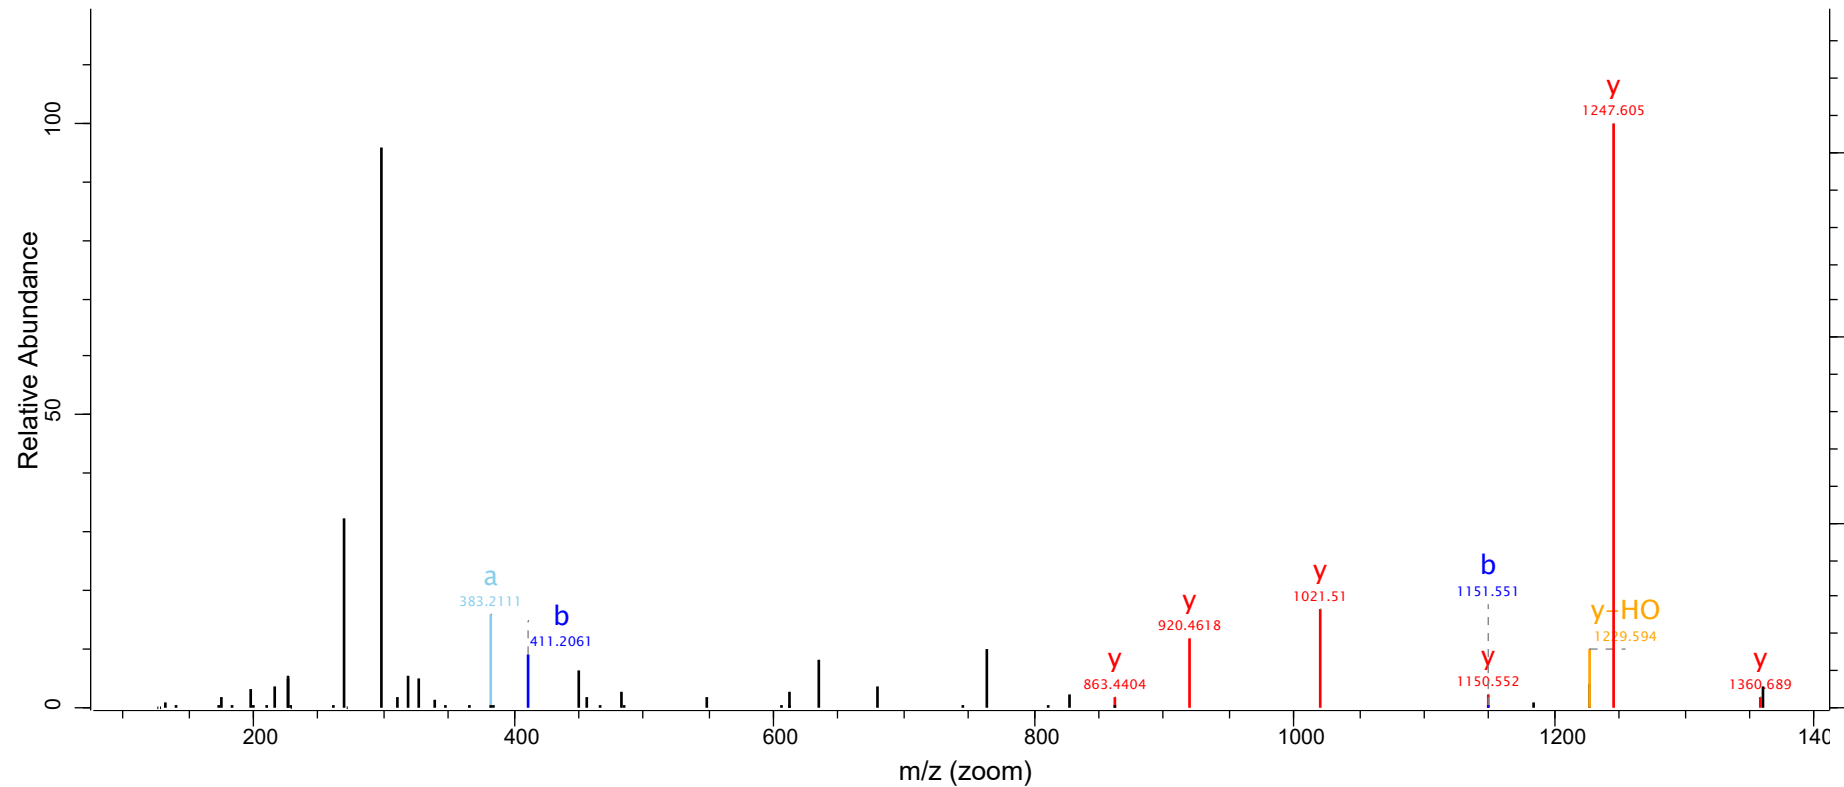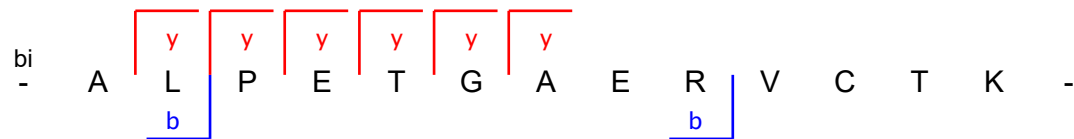



Raw File  
agg\_pep\_sort\_pos\_1

Scan  
20808

Method  
FTMS; HCD

Score  
98.05

m/z  
687.84

Gene names  
MARCKS

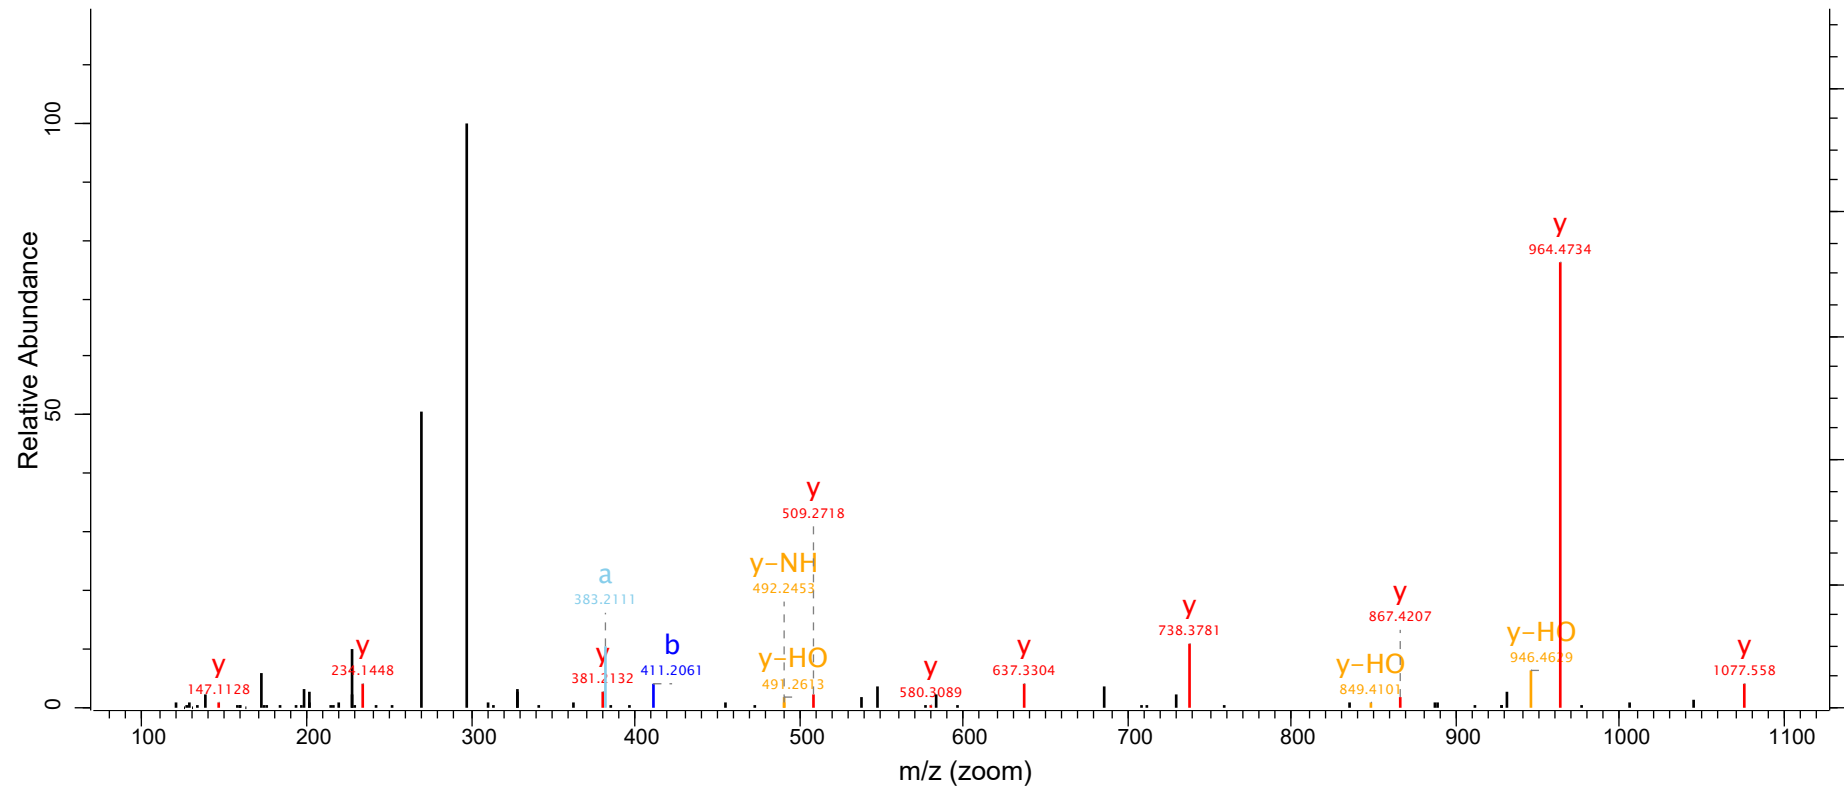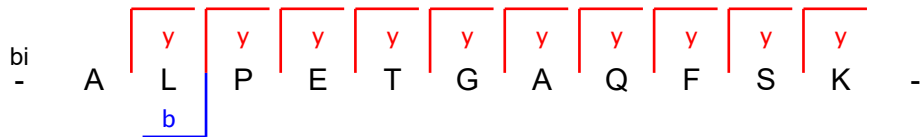

Raw File  
agg\_pep\_sort\_pos\_3

Scan  
9068

Method  
FTMS; HCD

Score  
89.4

m/z  
492.92

Gene names  
MBP

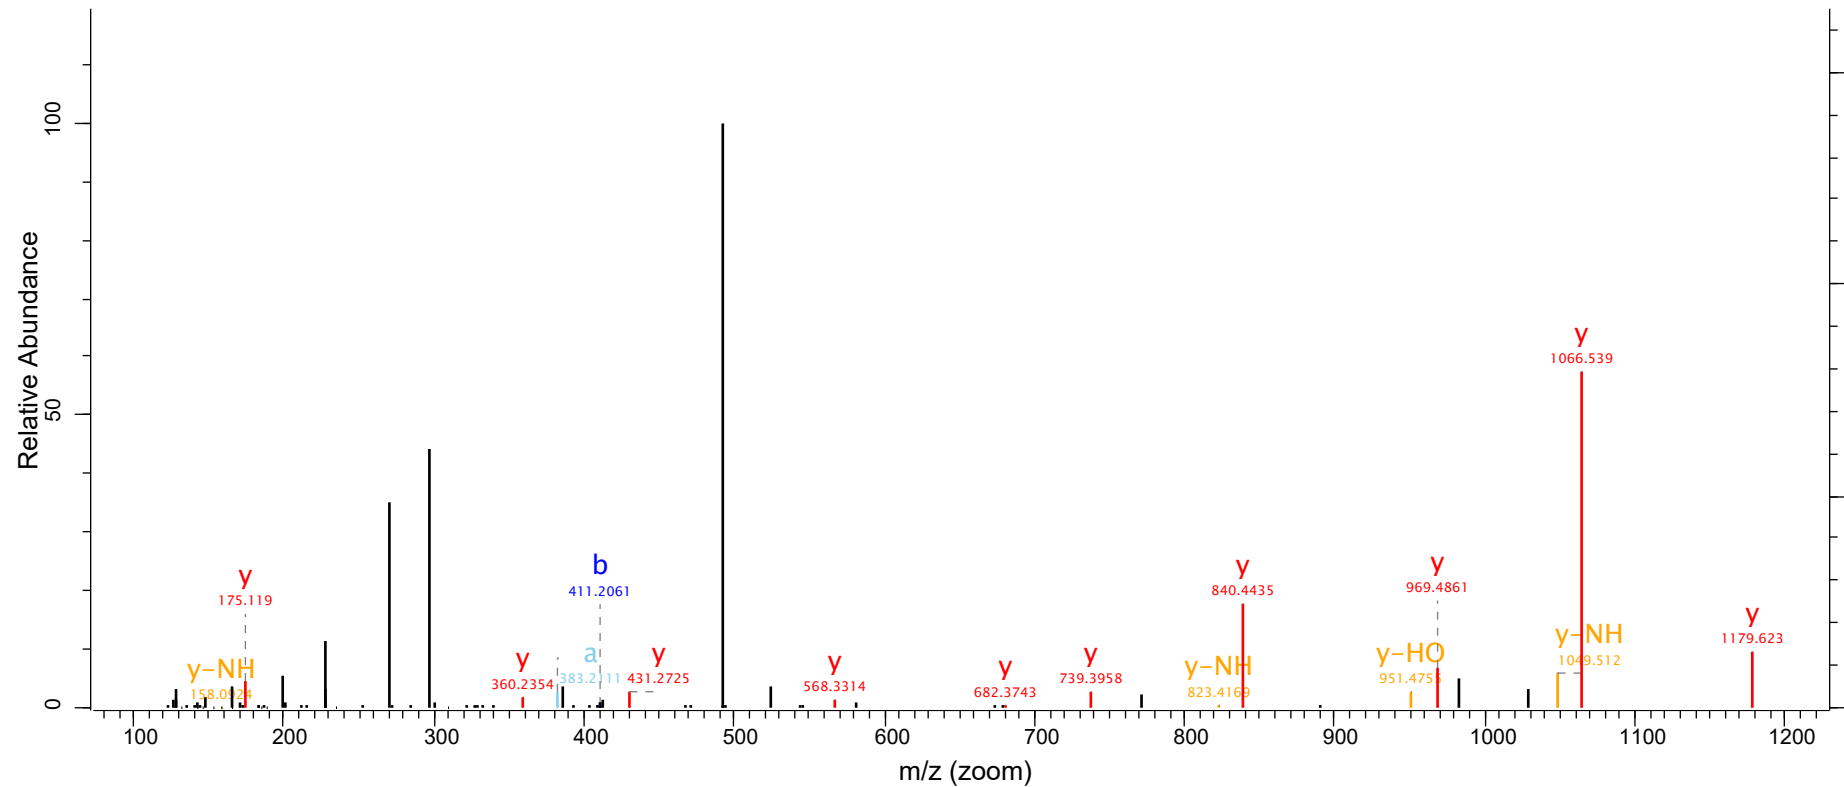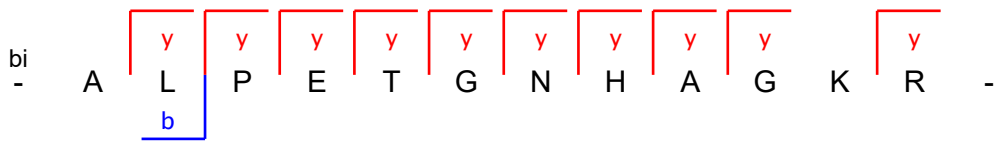

Raw File  
agg\_pep\_sort\_pos\_3

Scan  
15847

Method  
FTMS; HCD

Score  
78.15

m/z  
649.35

Gene names  
MRPL11

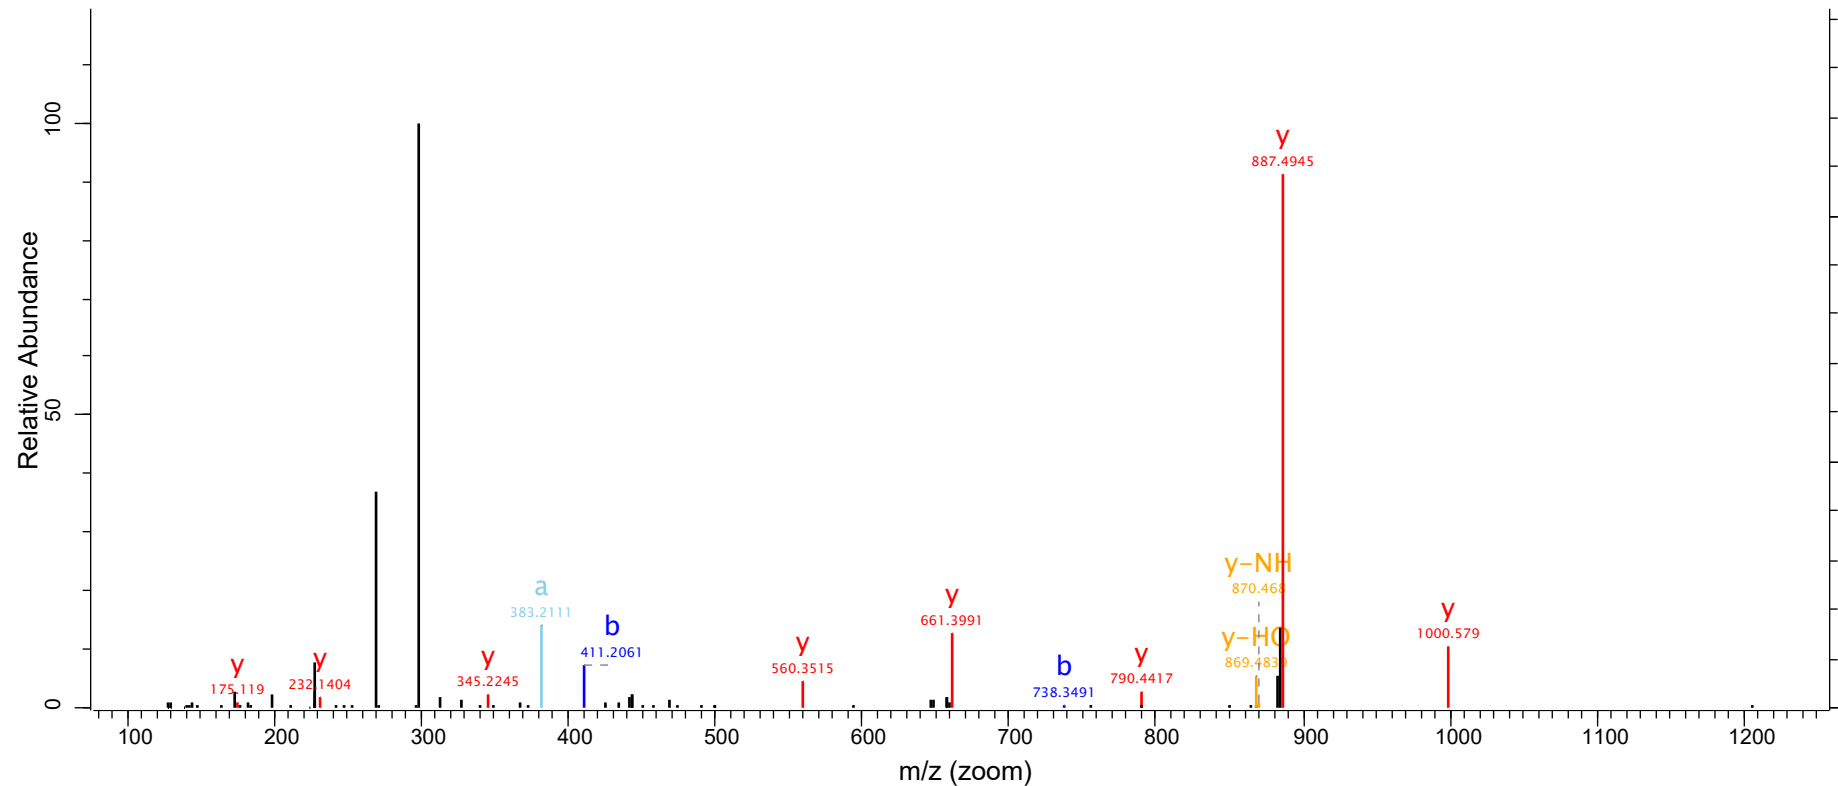

bi

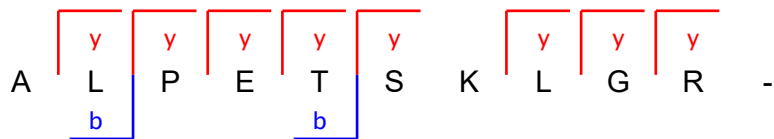

Raw File  
agg\_pep\_sort\_pos\_2

Scan  
17309

Method  
FTMS; HCD

Score  
88.68

m/z  
769.42

Gene names  
MSN

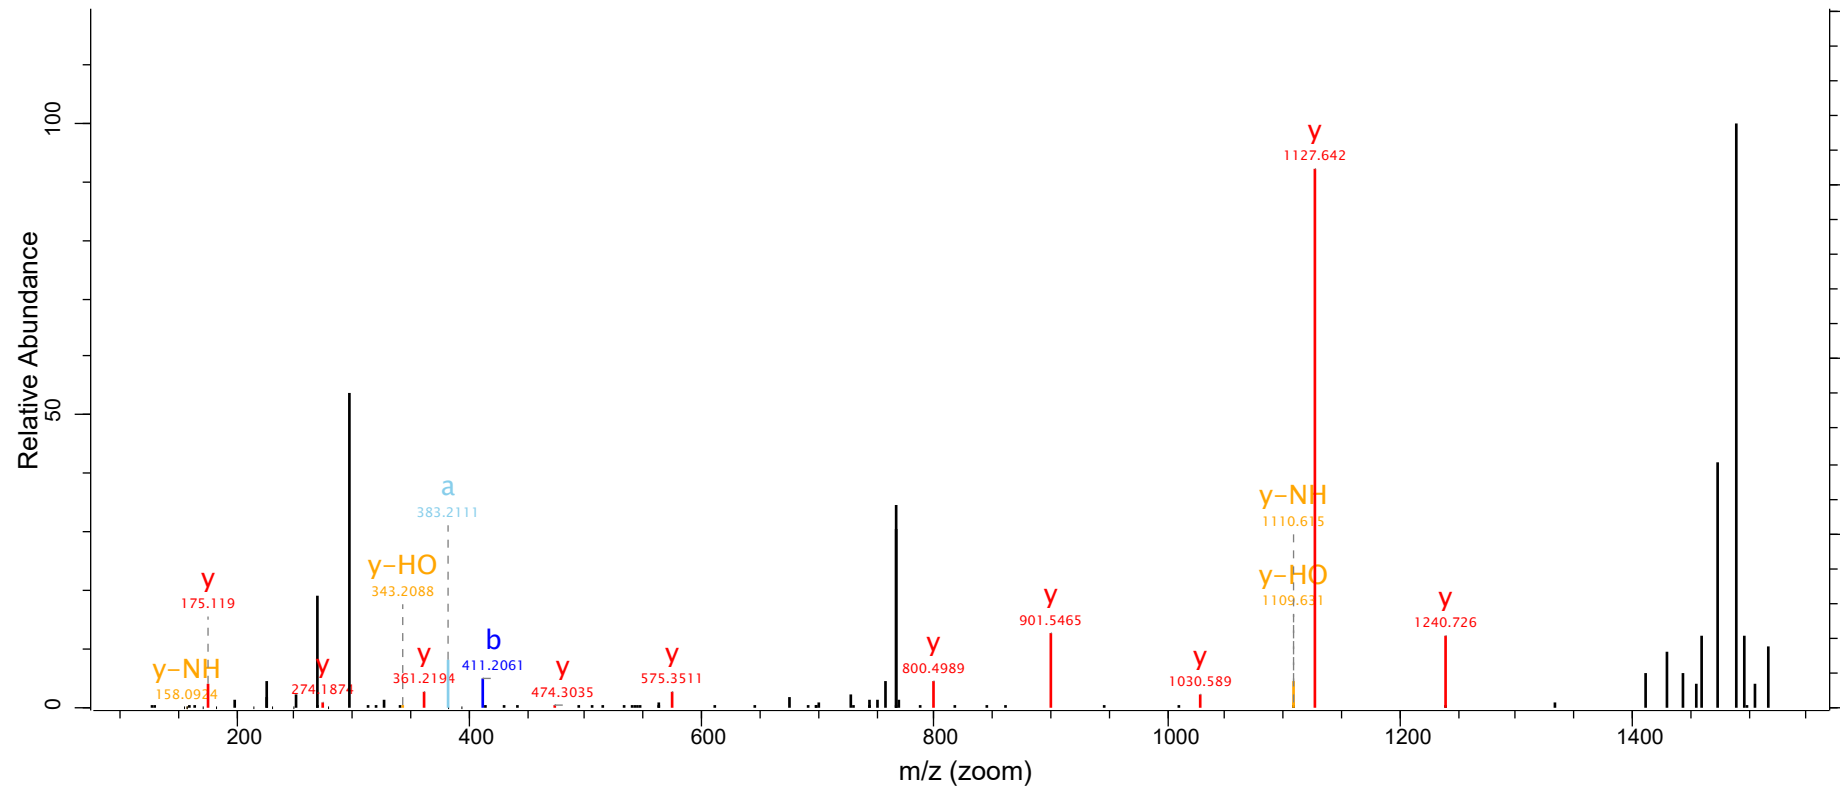

bi

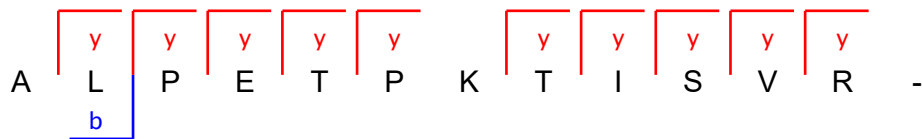

Raw File  
agg\_pep\_sort\_pos\_3

Scan  
19693

Method  
FTMS; HCD

Score  
108.4

m/z  
855.1

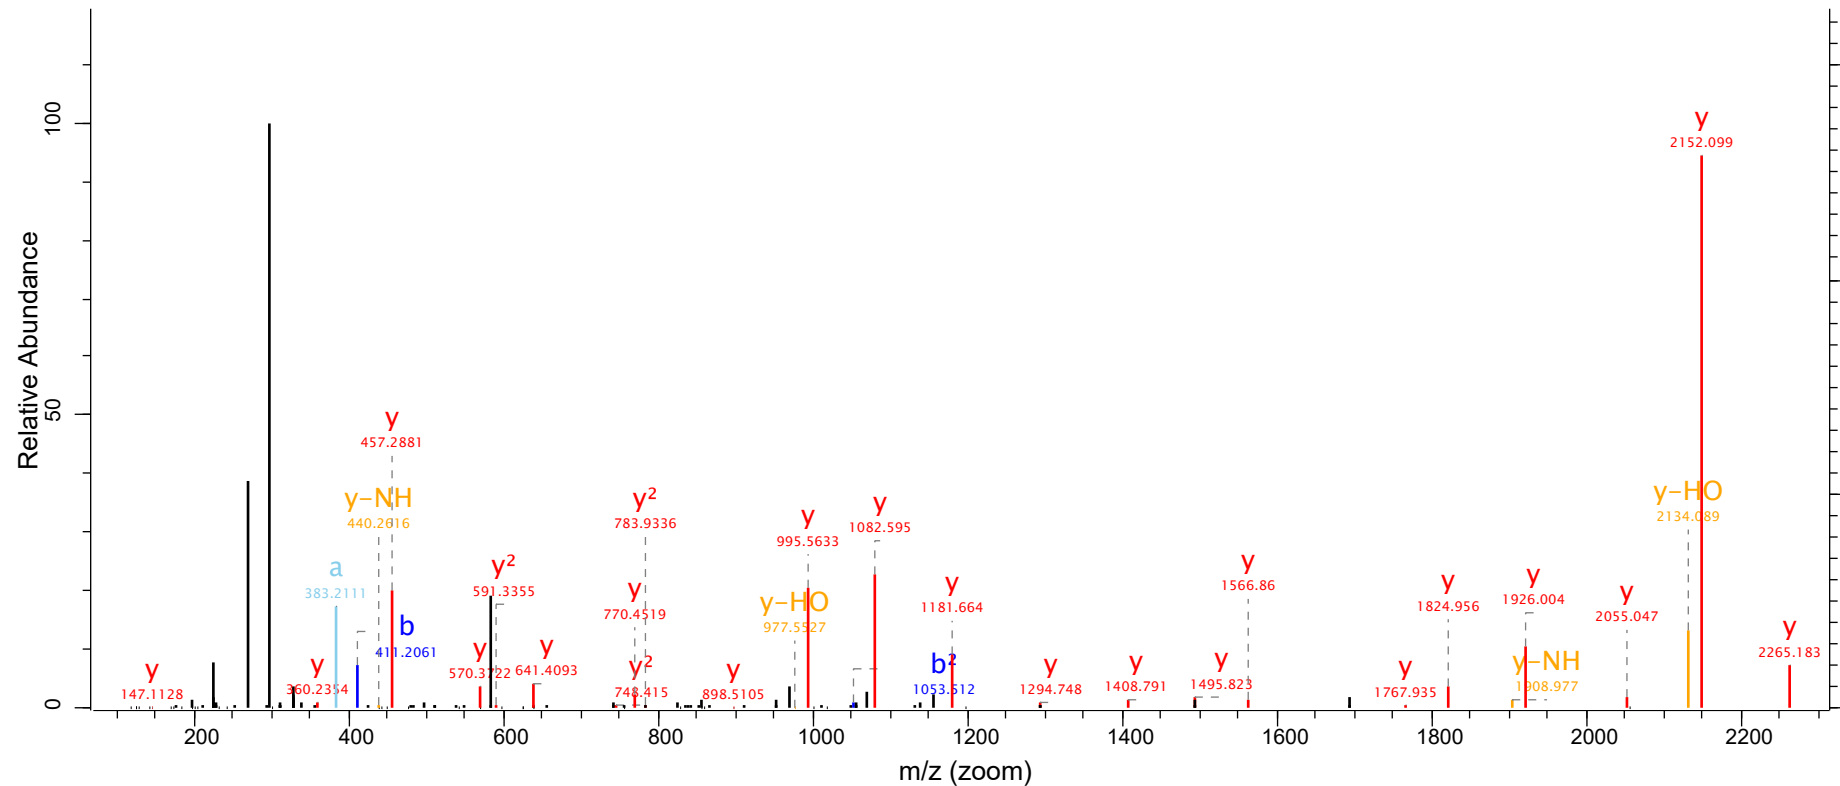

bi

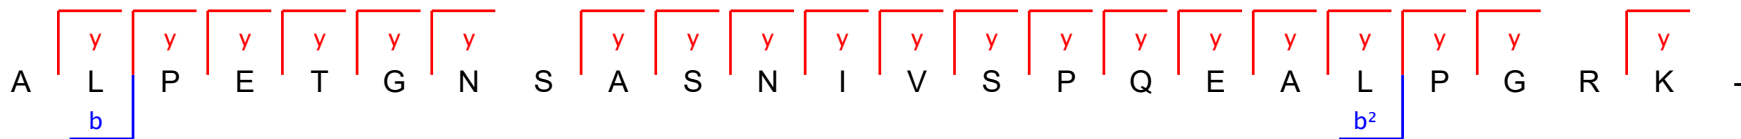

Raw File  
agg\_pep\_sort\_pos\_1

Scan  
13552

Method  
FTMS; HCD

Score  
39.66

m/z  
572.27

Gene names  
MYO22

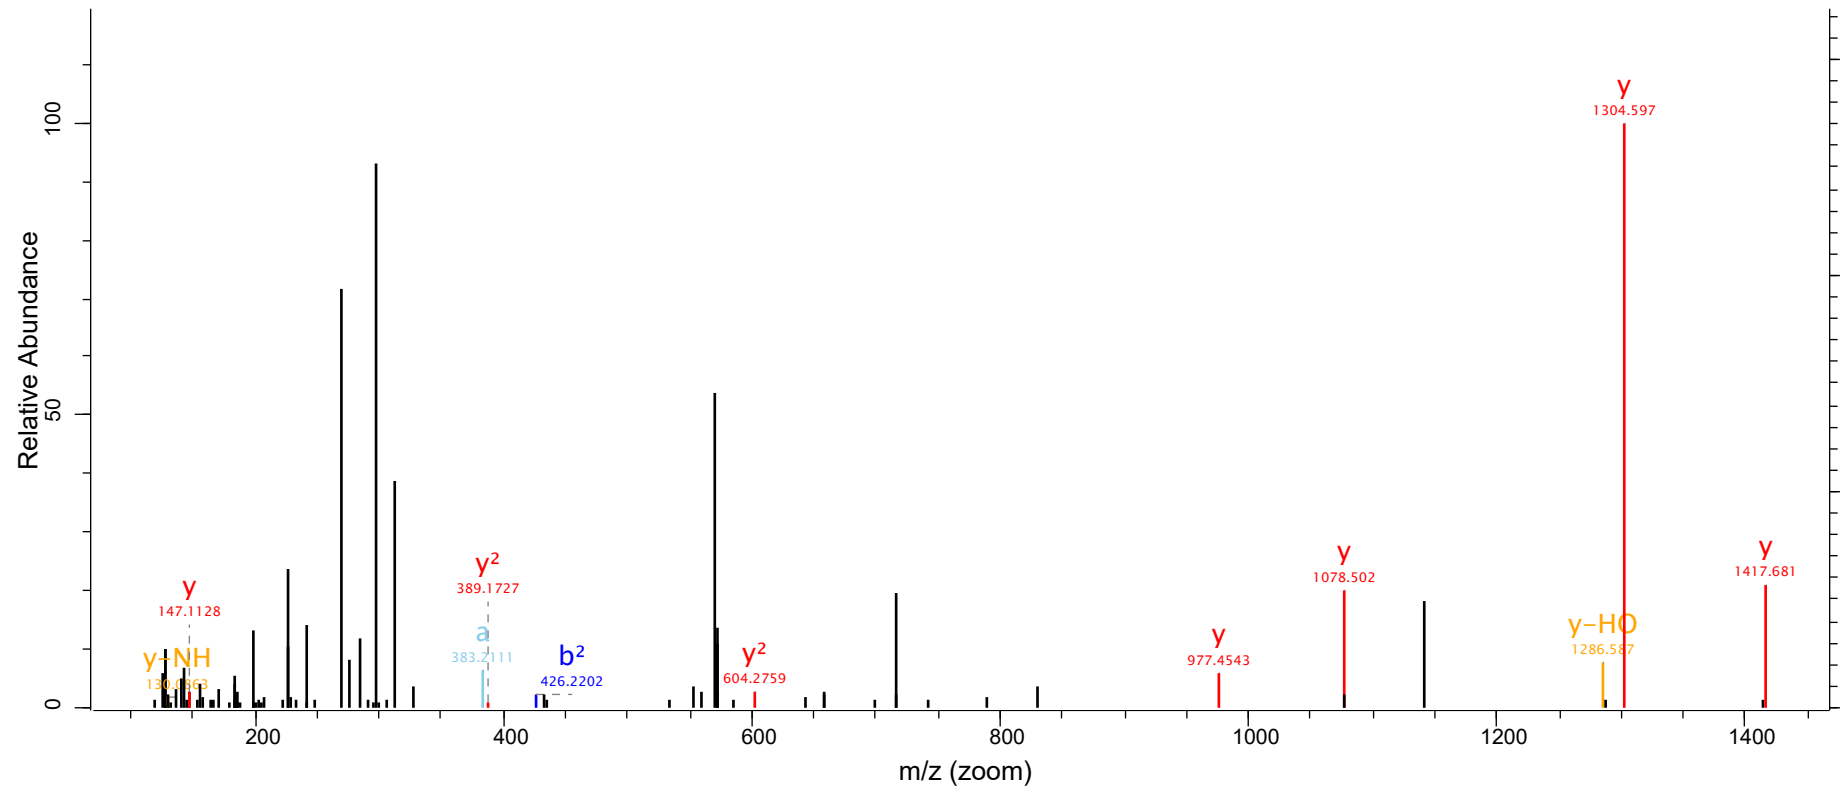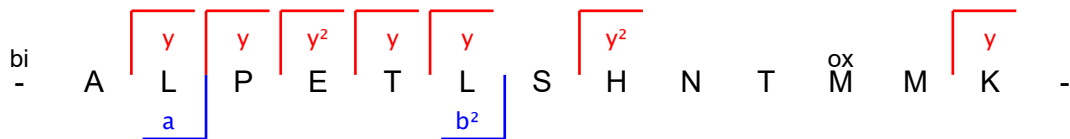

Raw File  
agg\_pep\_sort\_pos\_1

Scan  
17626

Method  
FTMS; HCD

Score  
40.43

m/z  
852.94

Gene names  
NBPF1

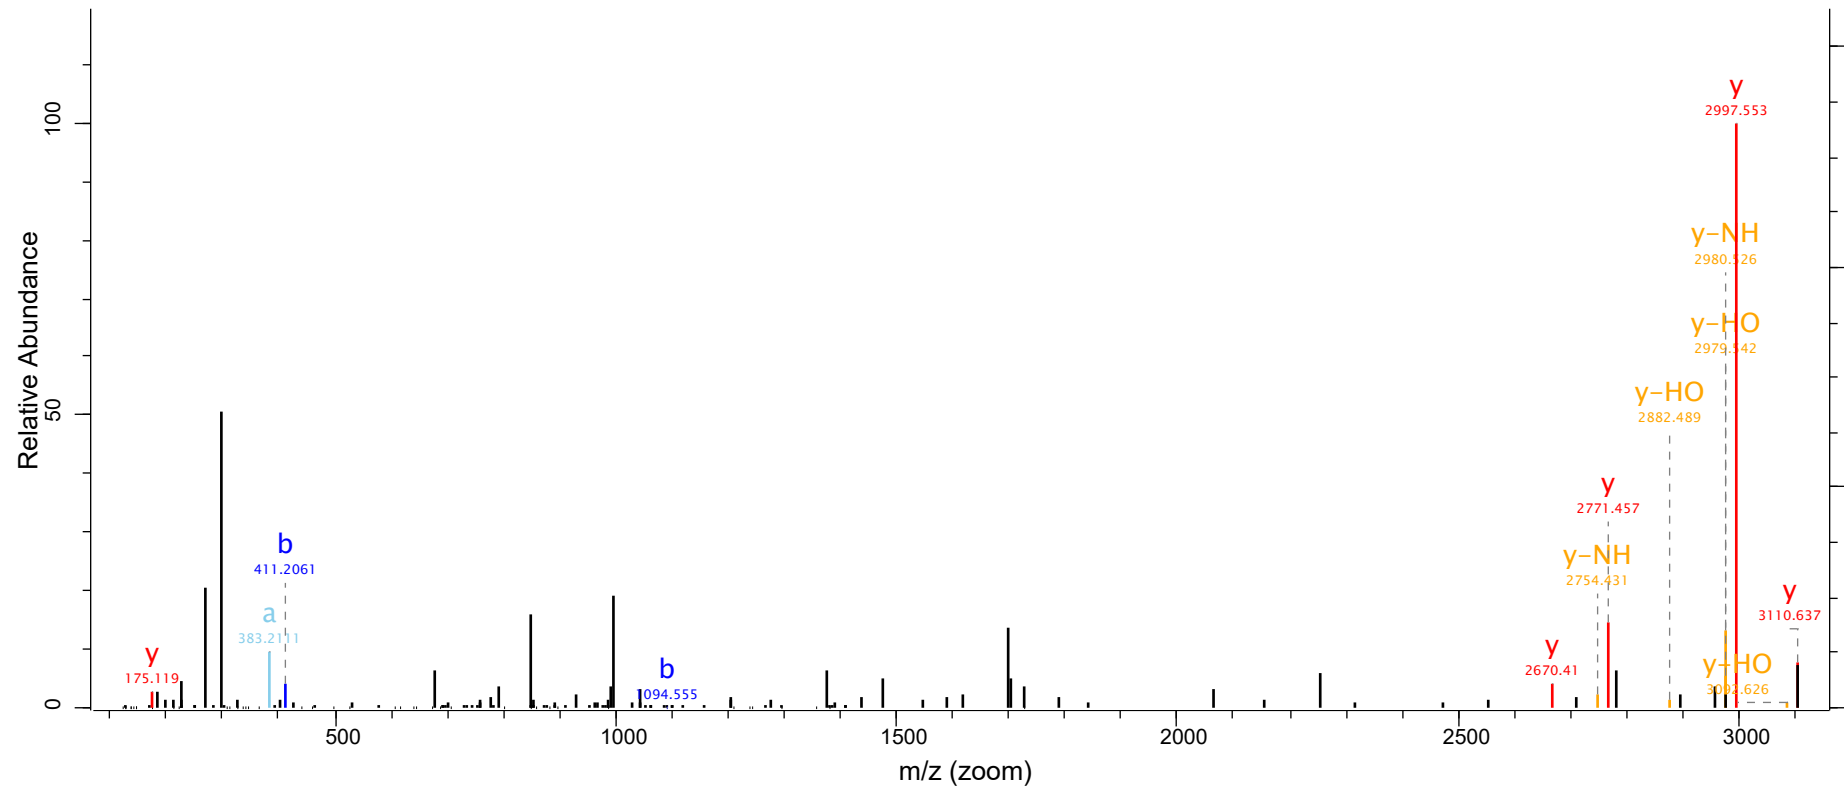

bi - A L P E T V V S A G P W S S E K A E T N I L E I  
N E K L R -

Fragmentation mapping:  
- Red brackets above the sequence indicate y-ions: L, P, T, V, A, G, P, W, S, S, E, K, A, E, T, N, I, L, E, I.  
- Blue brackets below the sequence indicate b-ions: L, P, A, G.

Raw File  
agg\_pep\_sort\_pos\_2

Scan  
23621

Method  
FTMS; HCD

Score  
72.8

m/z  
874.75

Gene names  
NCAPH

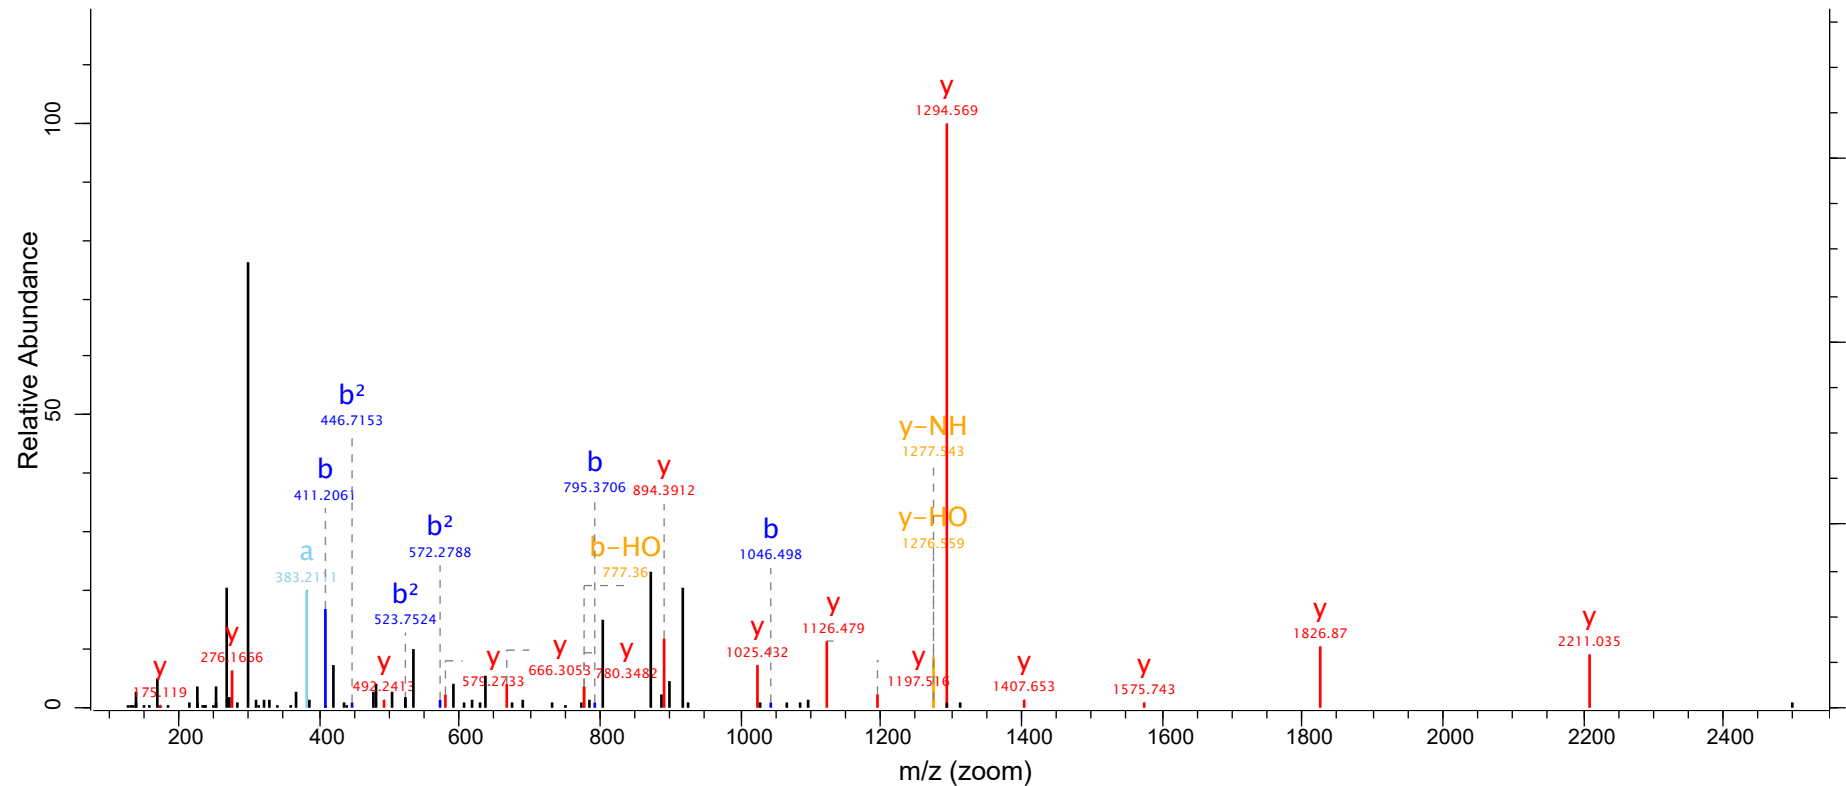

bi

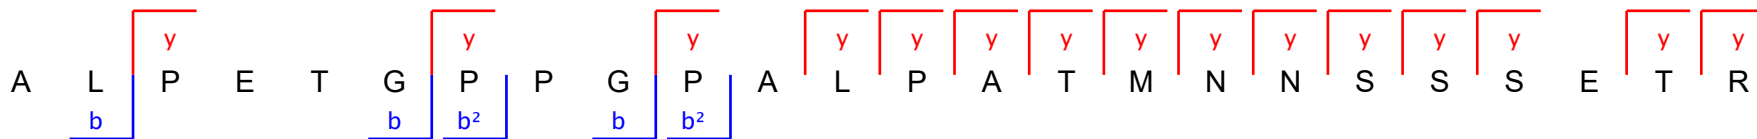



Raw File  
agg\_pep\_sort\_pos\_2

Scan  
13981

Method  
FTMS; HCD

Score  
82.29

m/z  
710.85

Gene names  
NEURL1B

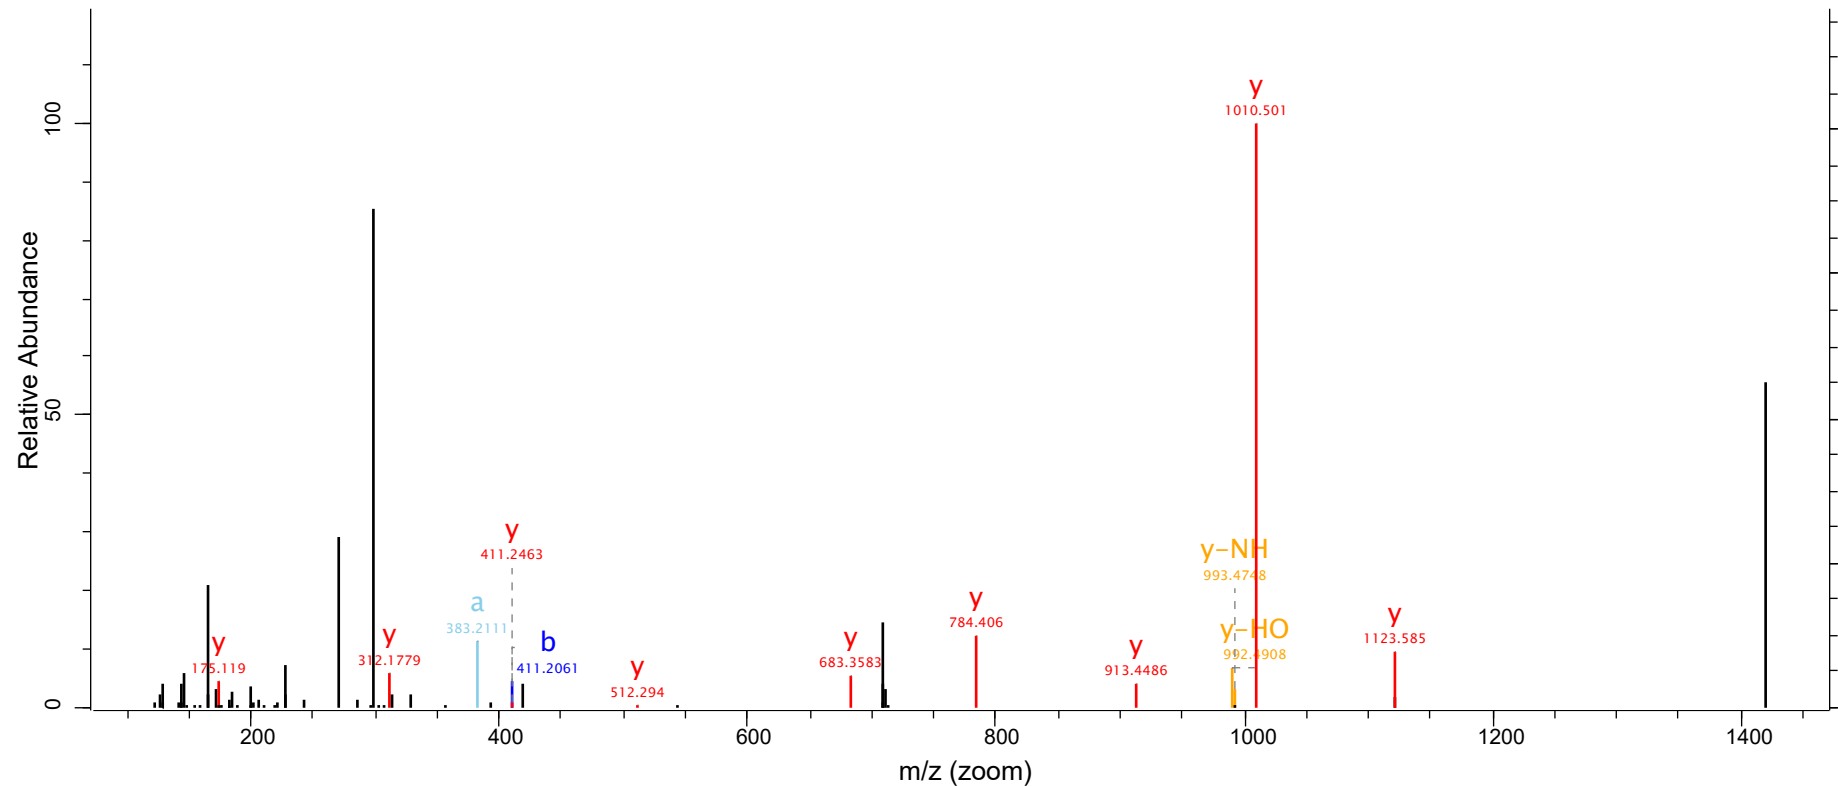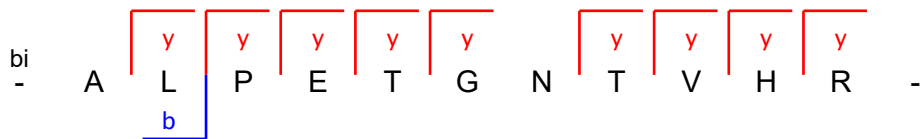

Raw File  
agg\_pep\_sort\_pos\_1

Scan  
21547

Method  
FTMS; HCD

Score  
65.31

m/z  
670.34

Gene names  
NOLC1

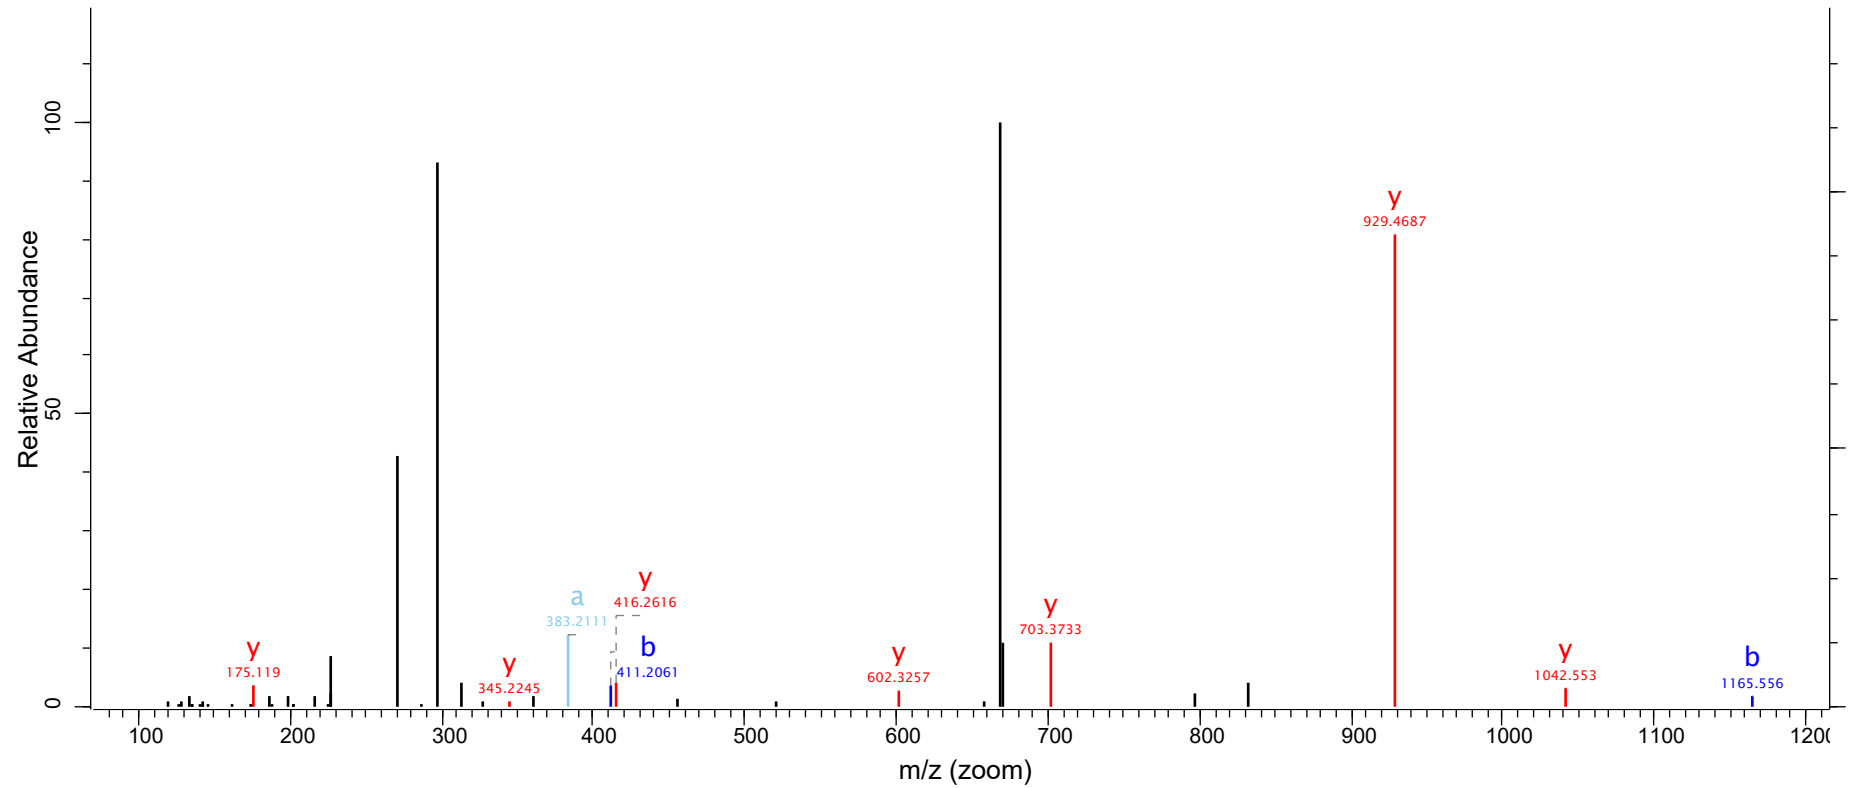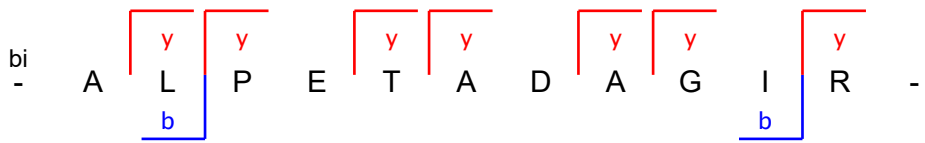

Raw File  
agg\_pep\_sort\_pos\_1

Scan  
13372

Method  
FTMS; HCD

Score  
78.33

m/z  
649.34

Gene names  
NOS1AP

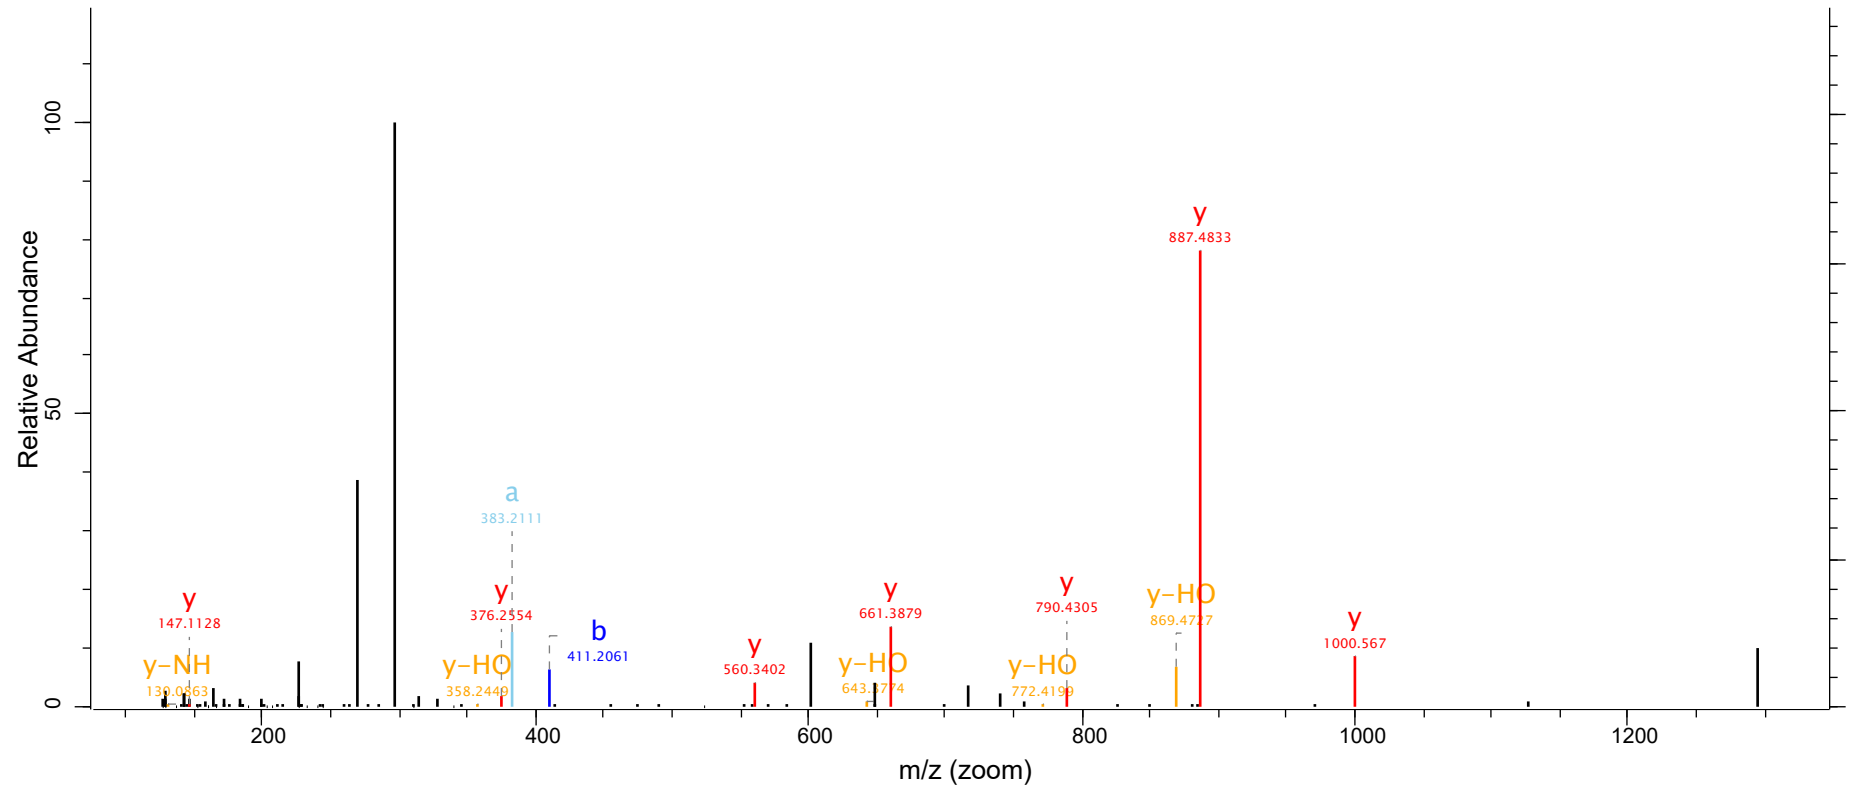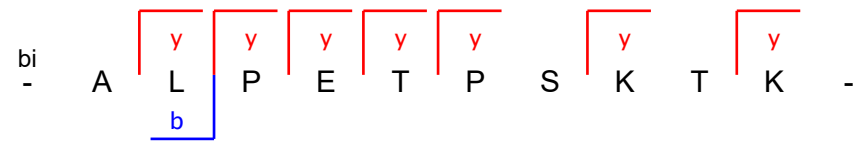

Raw File  
agg\_pep\_sort\_pos\_1

Scan  
20894

Method  
FTMS; HCD

Score  
47.29

m/z  
979.97

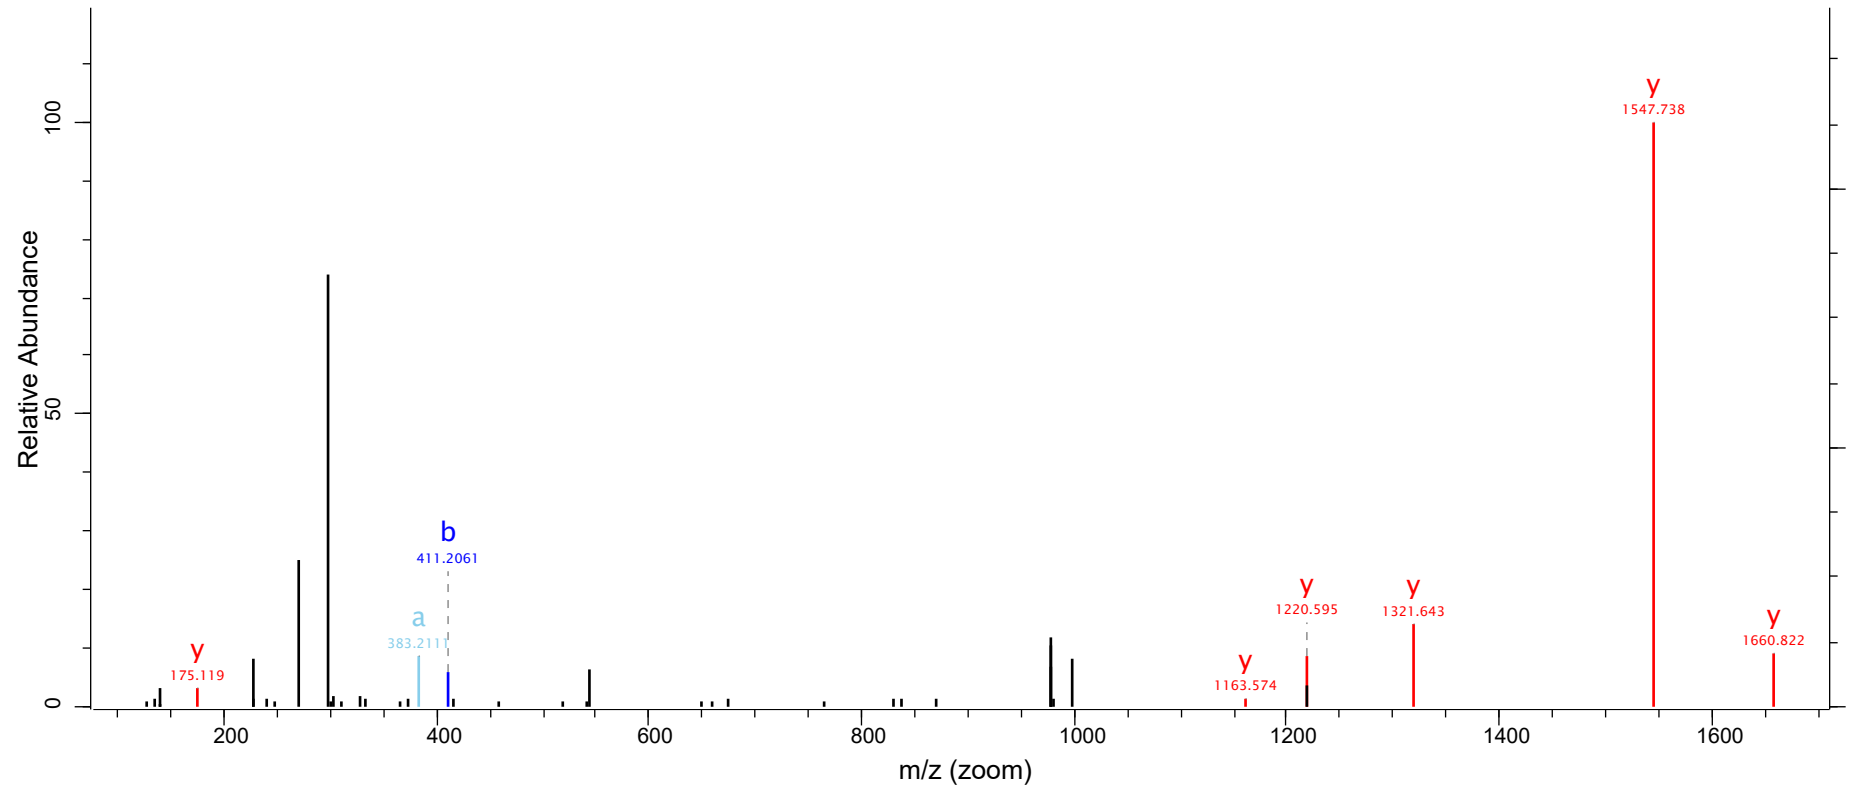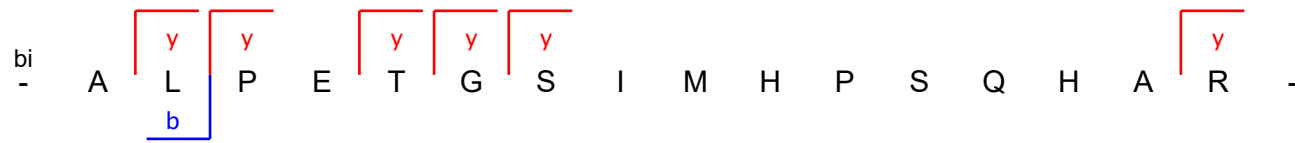

Raw File  
agg\_pep\_sort\_pos\_2

Scan  
17596

Method  
FTMS; HCD

Score  
61.35

m/z  
835.87

Gene names  
NUDC

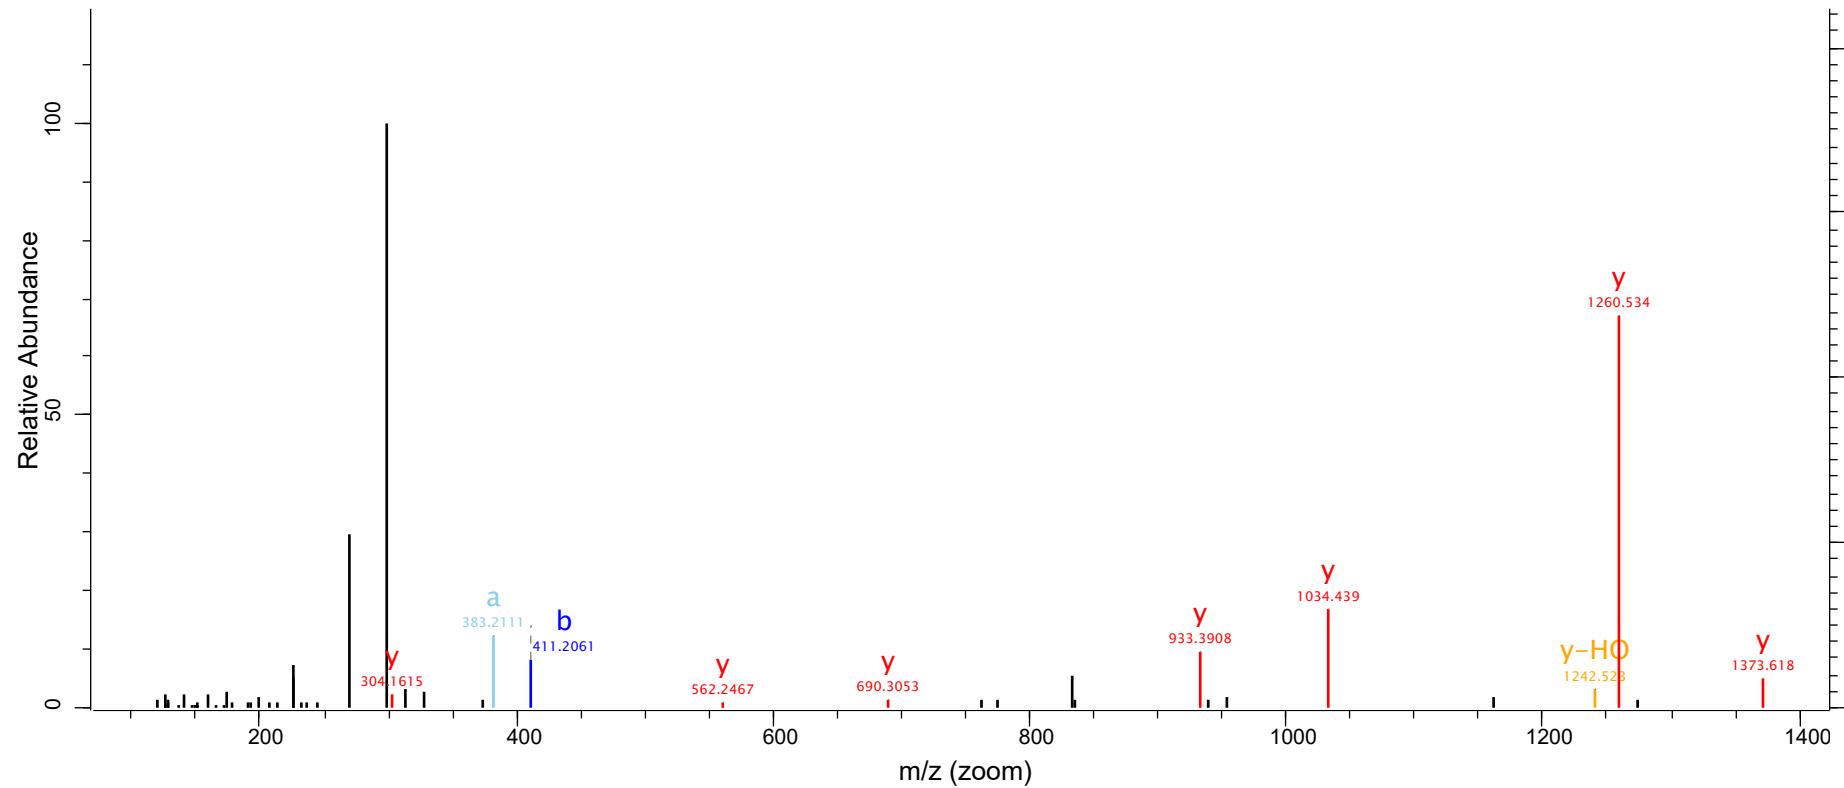

bi

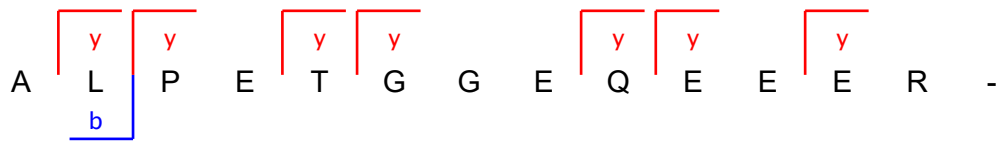

Raw File  
agg\_pep\_sort\_pos\_2

Scan  
21201

Method  
FTMS; HCD

Score  
68.73

m/z  
702.35

Gene names  
PPAP2A

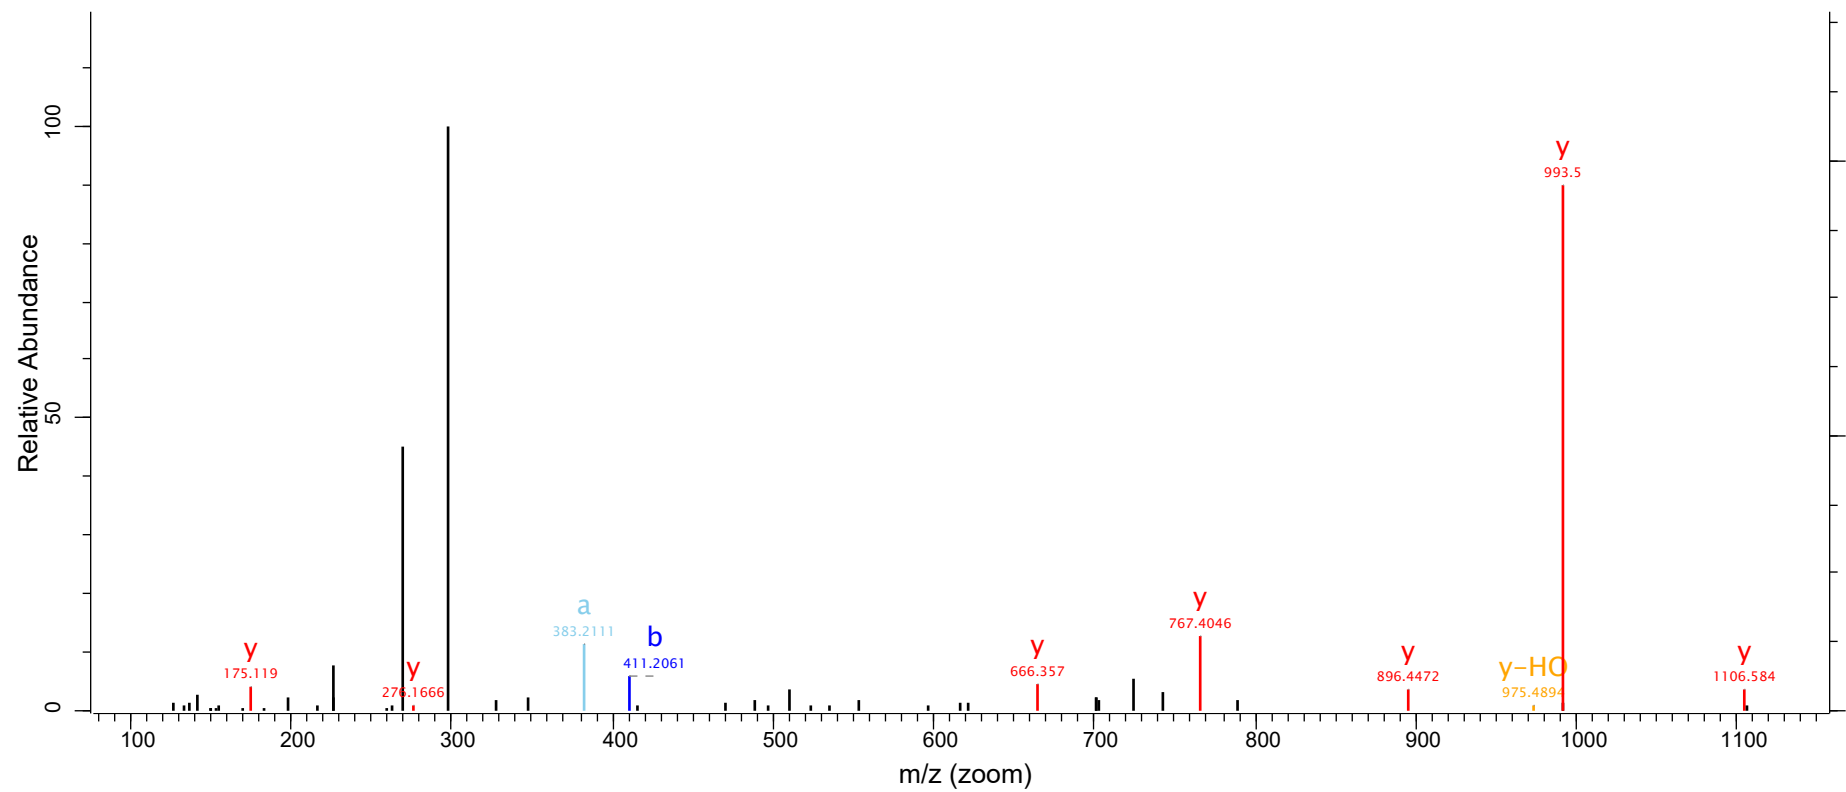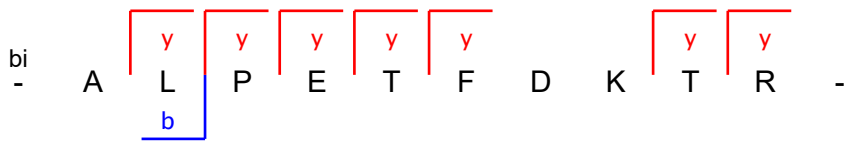

Raw File  
agg\_pep\_sort\_pos\_1

Scan  
17696

Method  
FTMS; HCD

Score  
45.33

m/z  
658.01

Gene names  
PPM1B

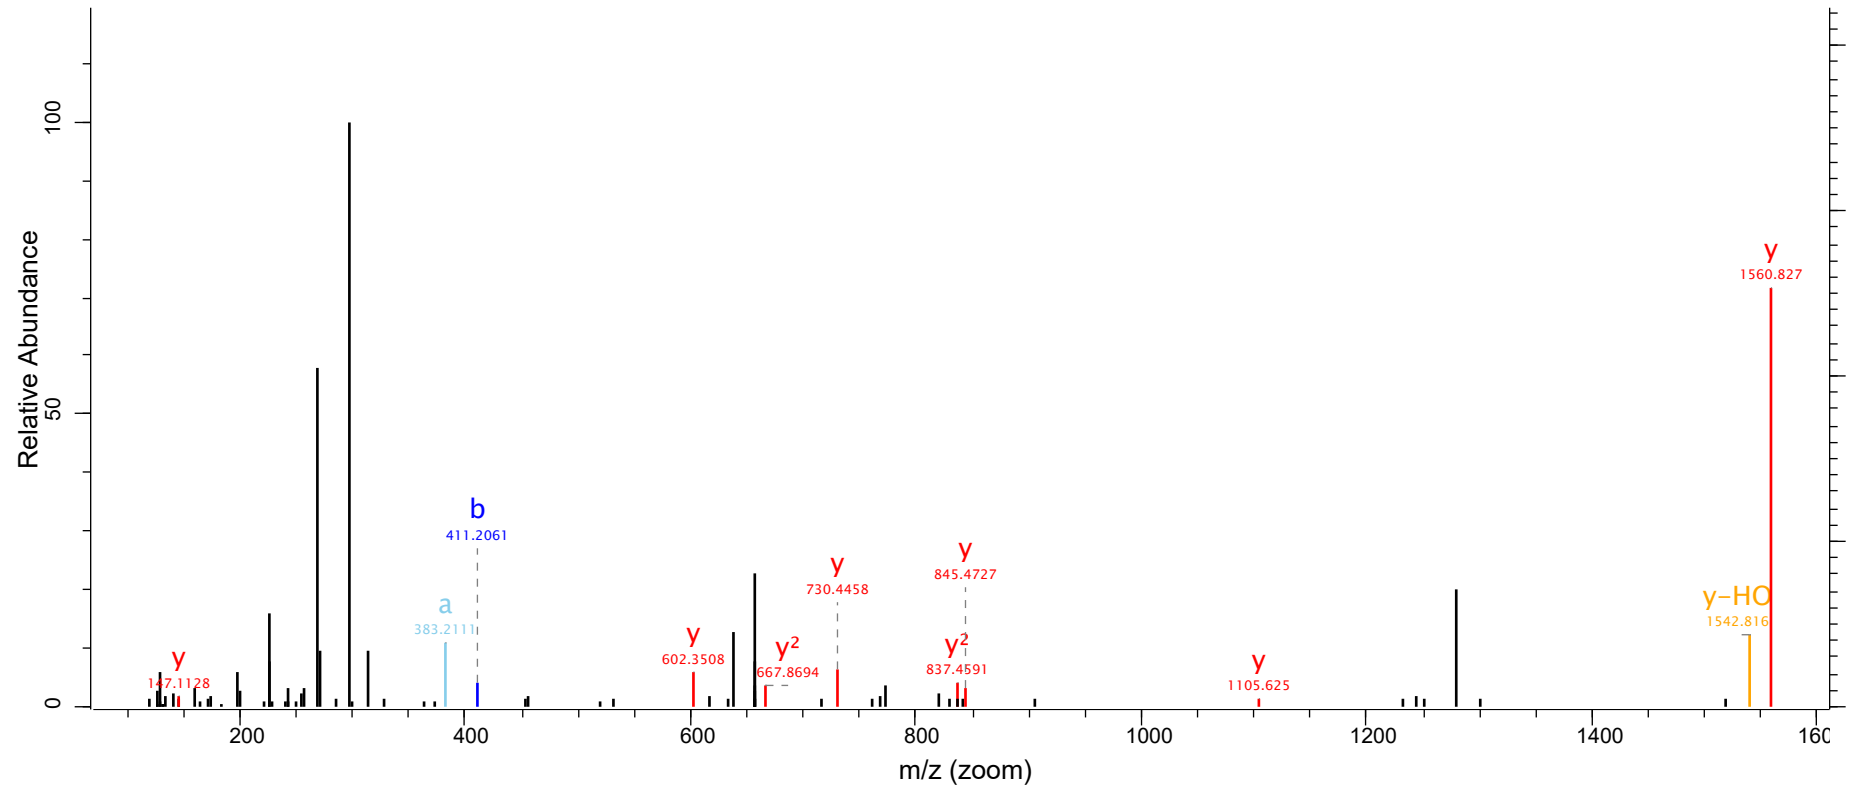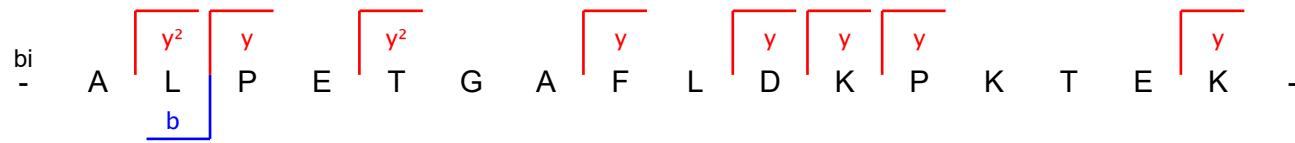

Raw File  
agg\_pep\_sort\_pos\_1

Scan  
17865

Method  
FTMS; HCD

Score  
112.84

m/z  
749.88

Gene names  
PPP1R9B

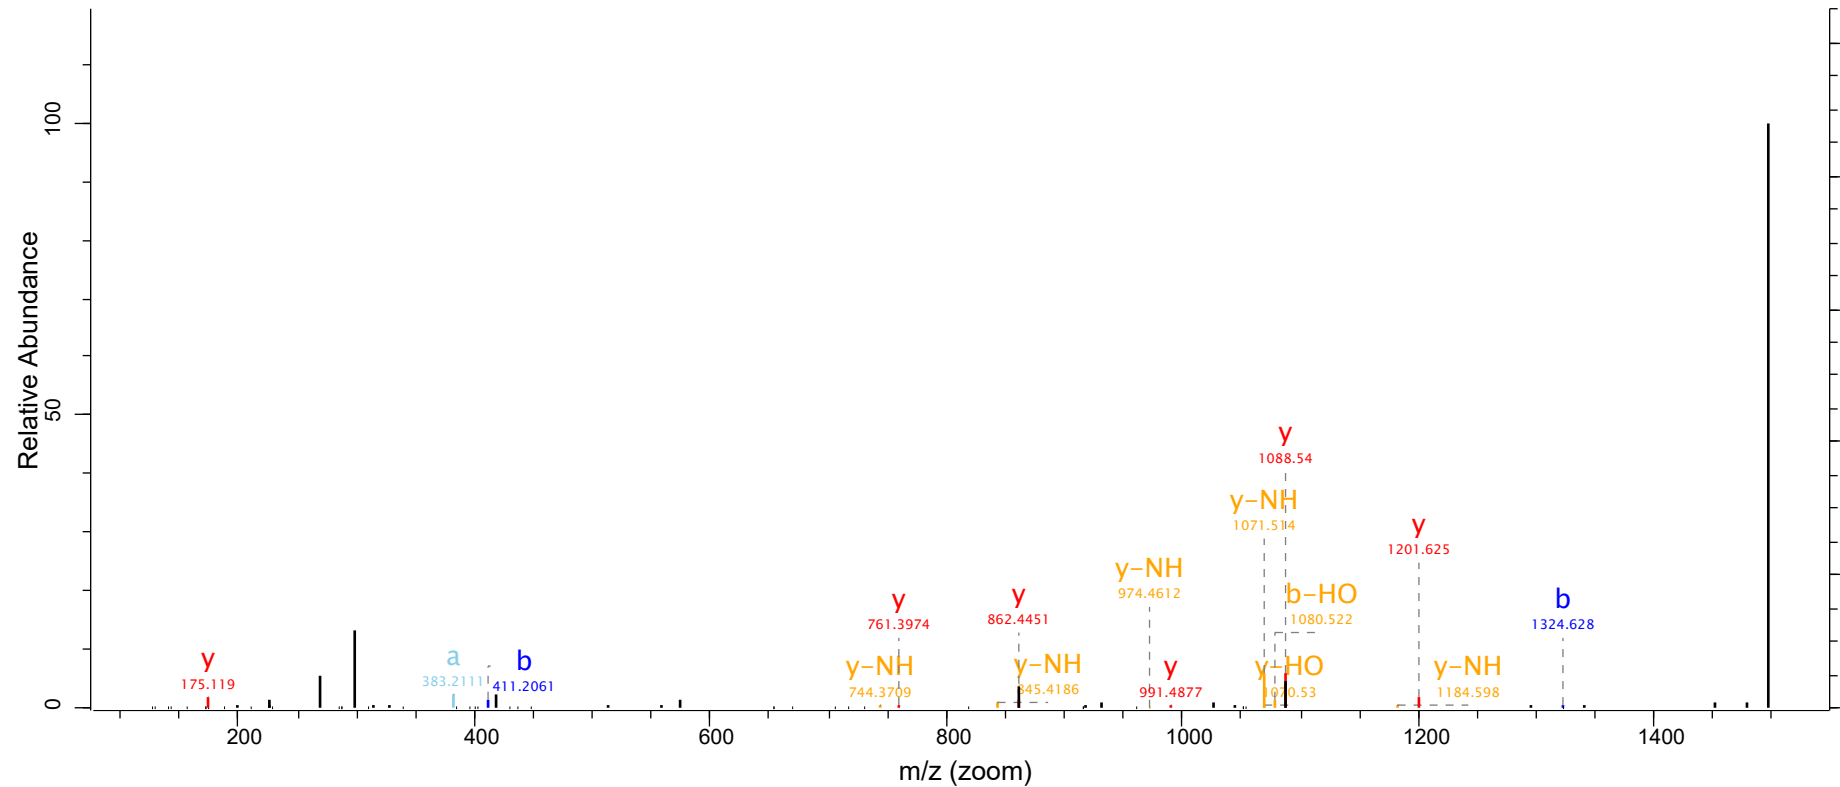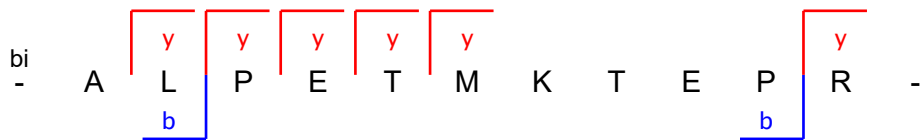



Raw File  
agg\_pep\_sort\_pos\_3

Scan  
19856

Method  
FTMS; HCD

Score  
32.95

m/z  
1075.48

Gene names  
PPP3R1

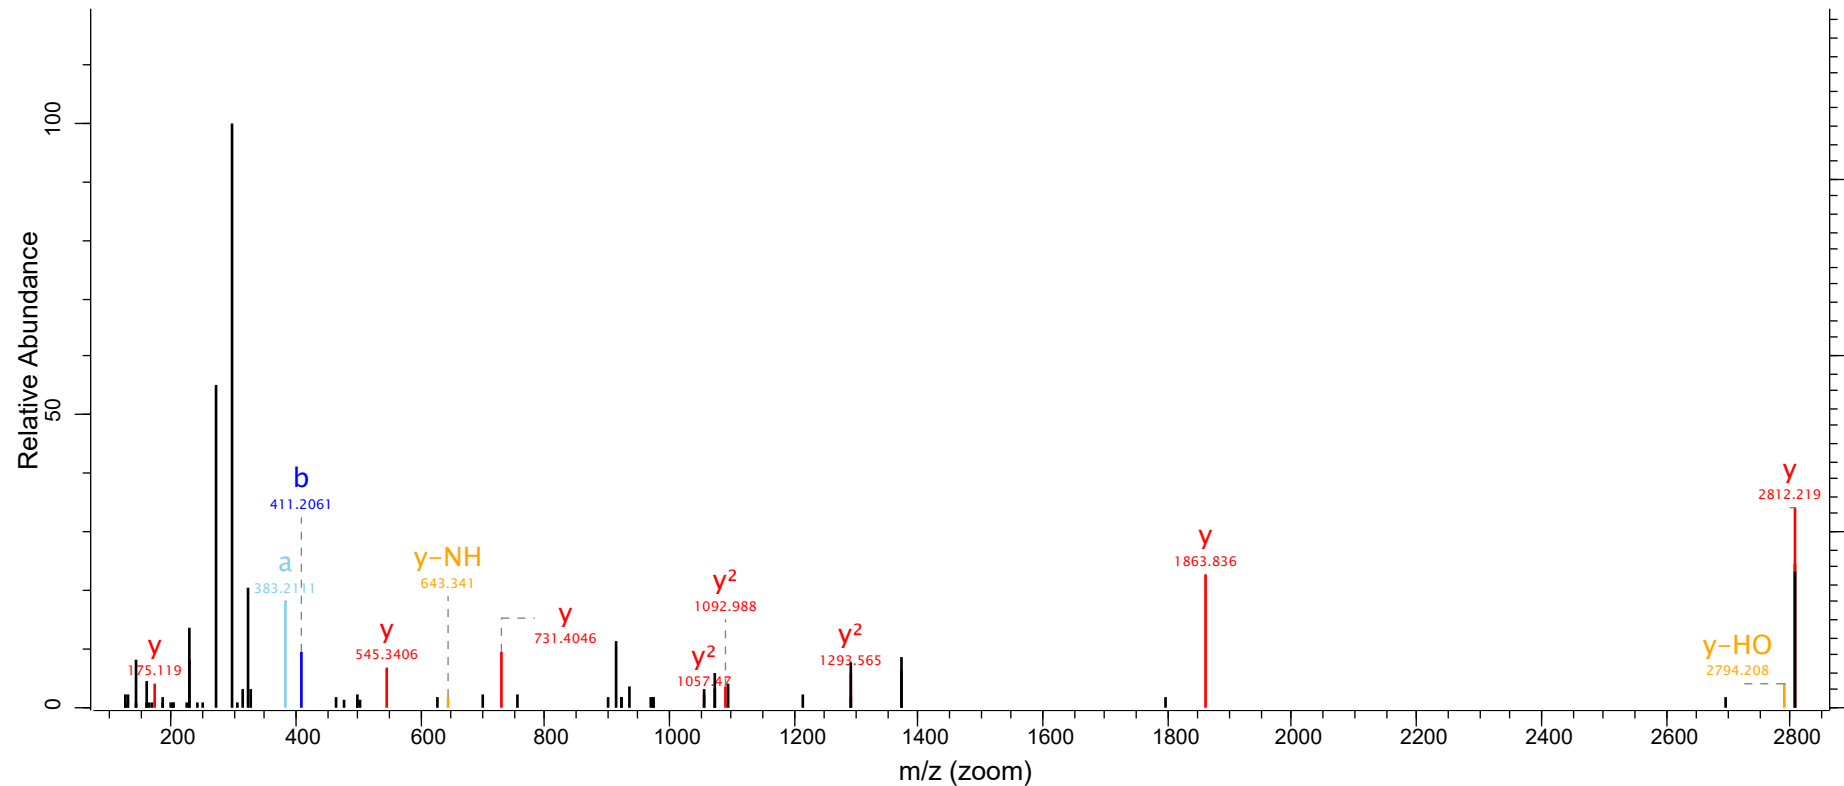

bi - A L P E T G N E A S Y P L E M<sup>ox</sup> C S H F D A D E I  
K R -

Fragmentation labels (y, y<sup>2</sup>, b) are shown above the corresponding amino acids in the sequence.

Raw File  
agg\_pep\_sort\_pos\_3

Scan  
21538

Method  
FTMS; HCD

Score  
42.81

m/z  
1069.81

Gene names  
PPP3R1

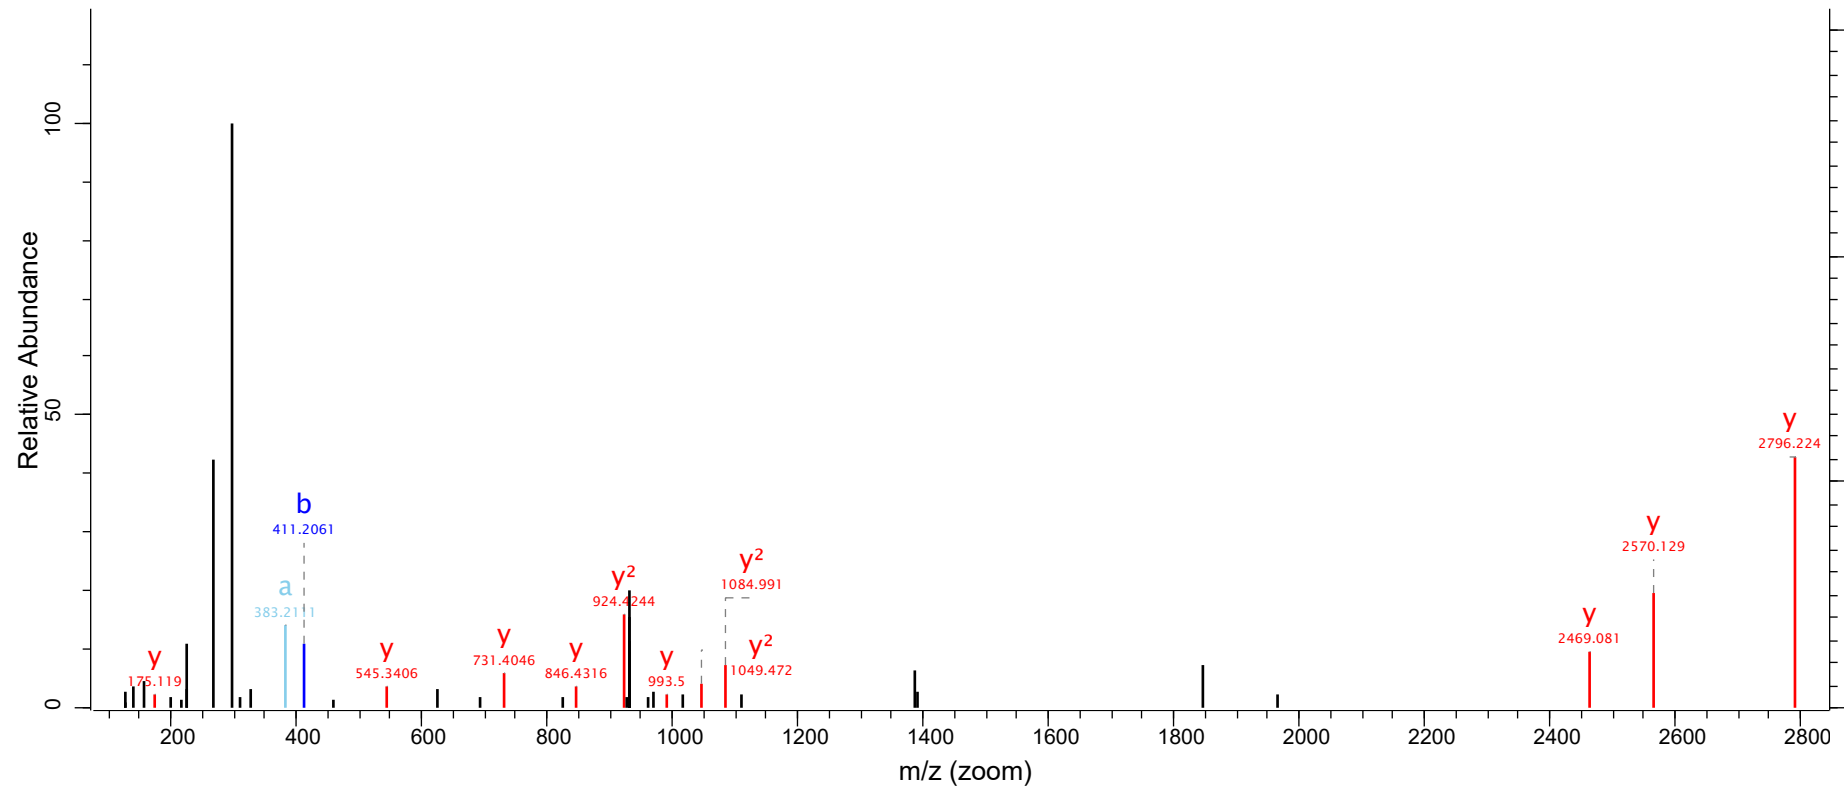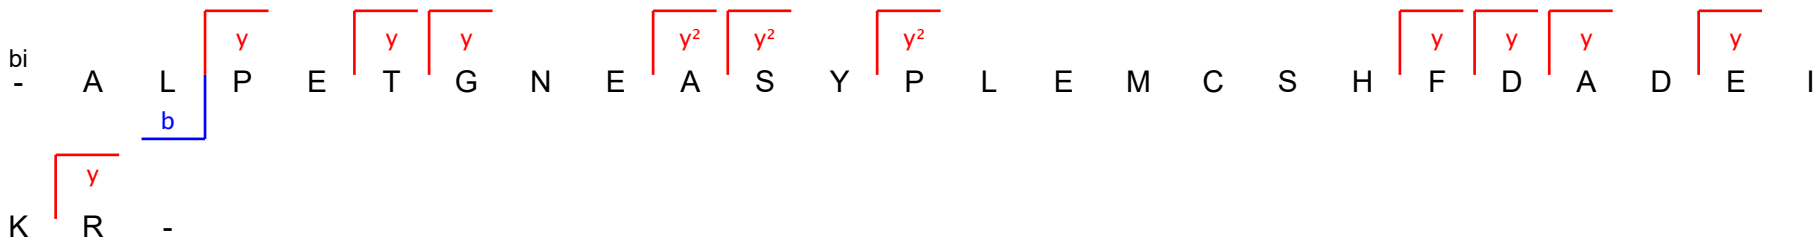

Raw File  
agg\_pep\_sort\_pos\_1

Scan  
12752

Method  
FTMS; HCD

Score  
105.2

m/z  
734.39

Gene names  
PRKACA

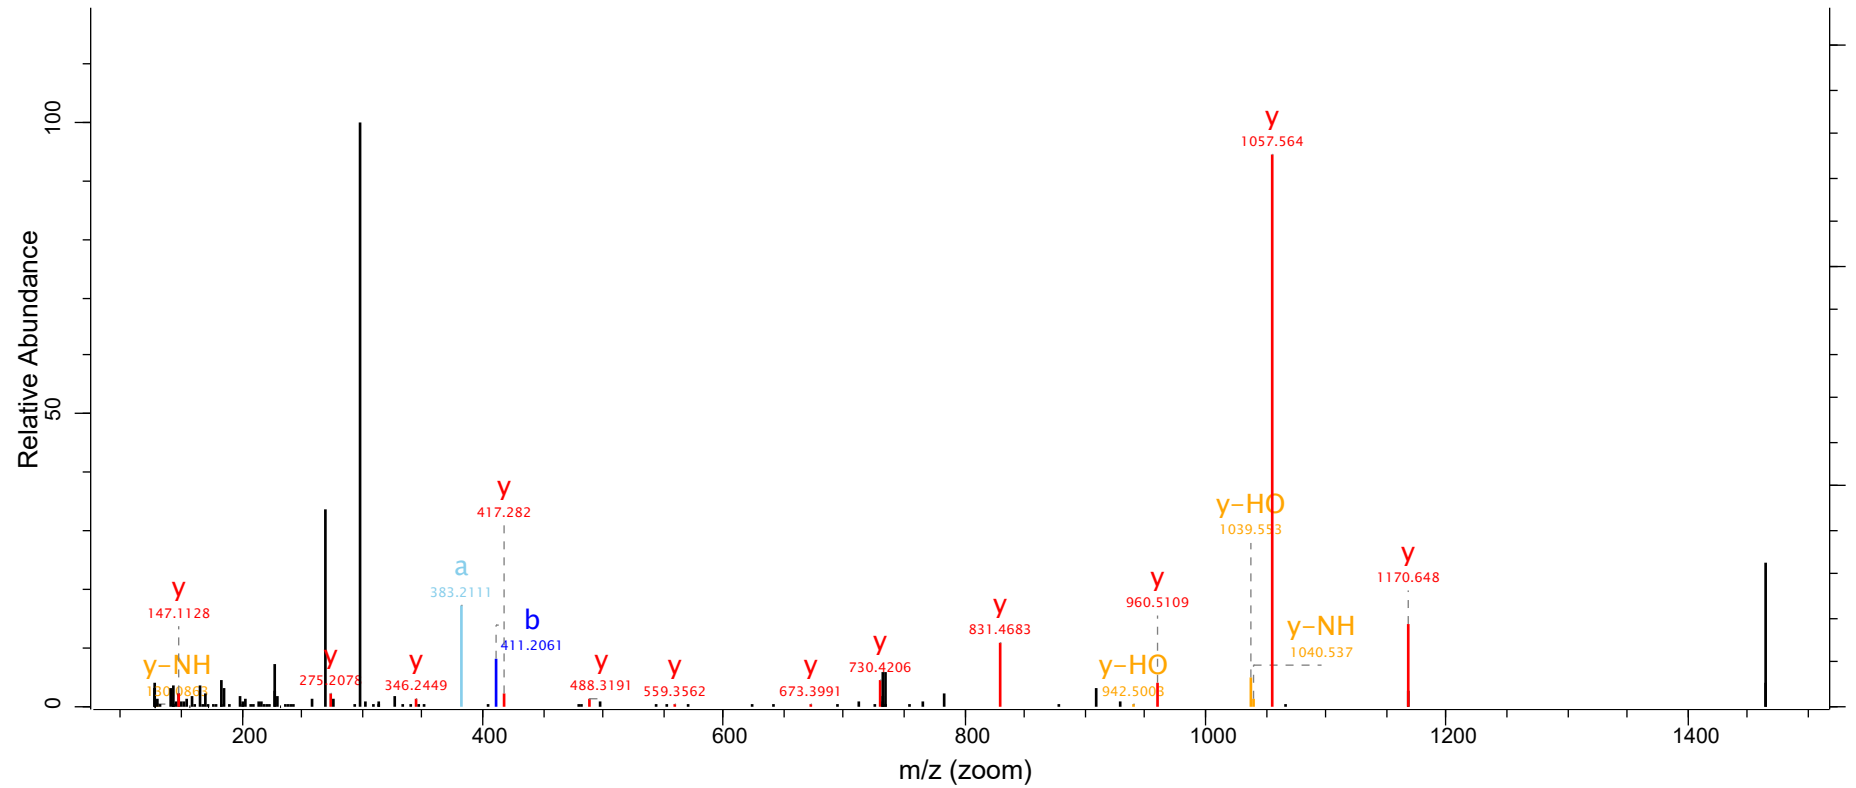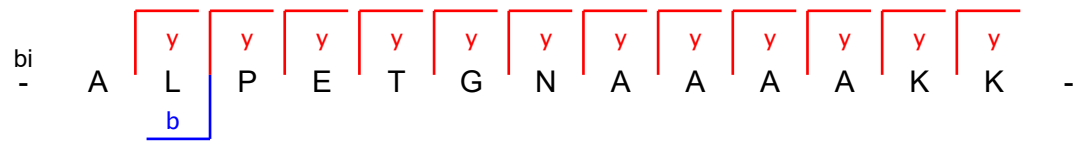

Raw File  
agg\_pep\_sort\_pos\_1

Scan  
17256

Method  
FTMS; HCD

Score  
107.15

m/z  
670.34

Gene names  
PRKACA

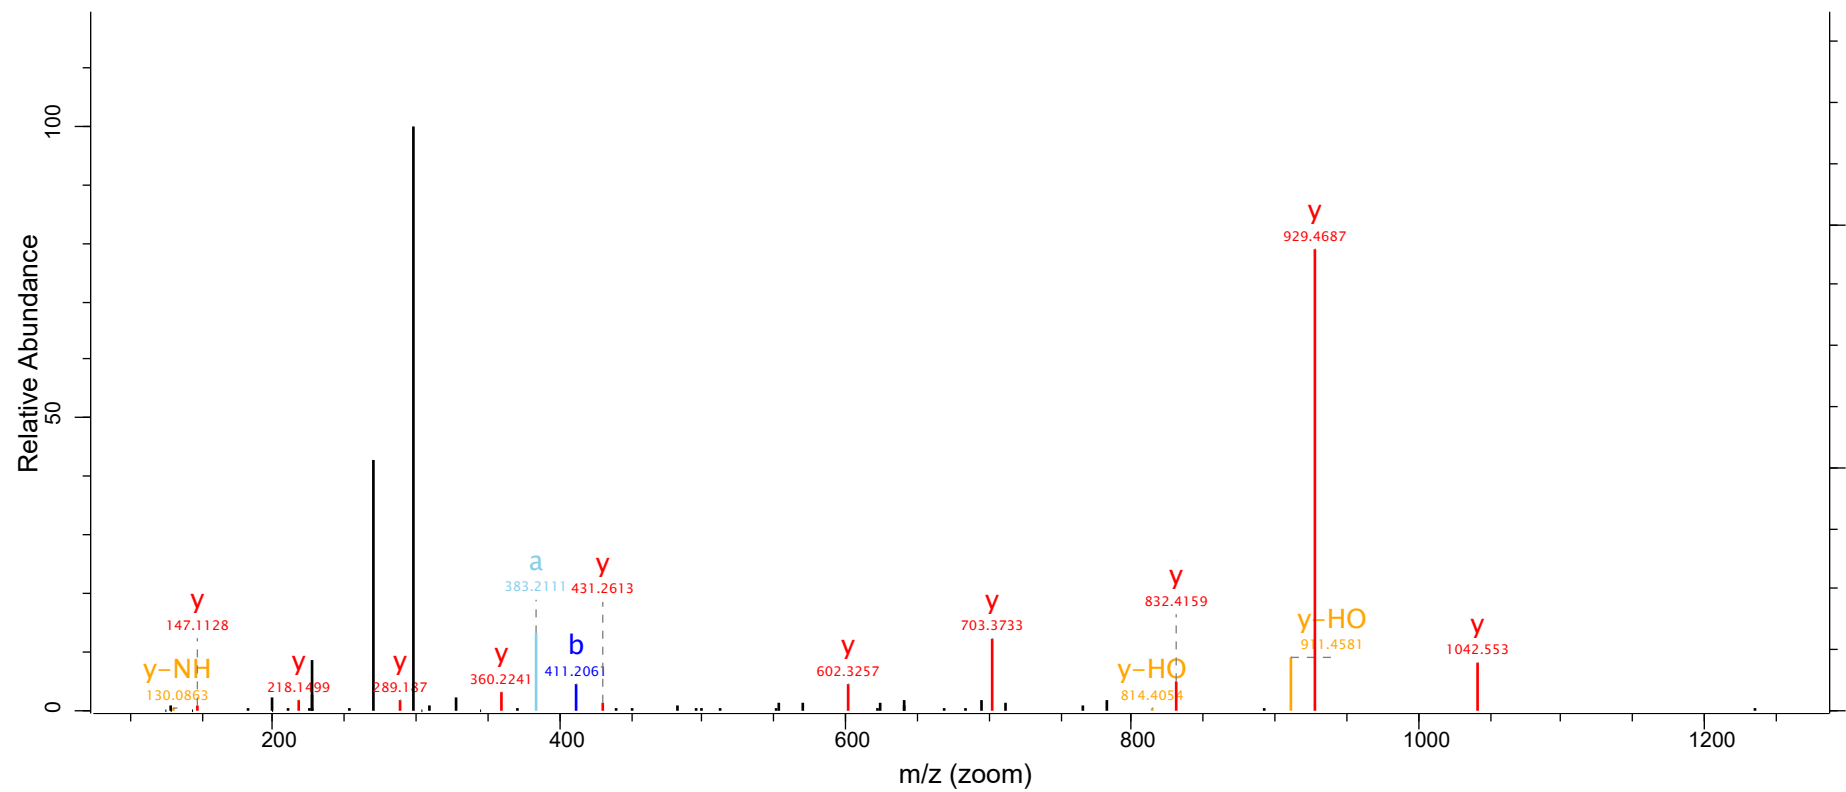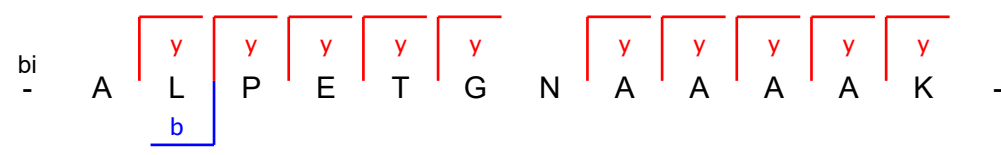

Raw File  
agg\_pep\_sort\_pos\_1

Scan  
20947

Method  
FTMS; HCD

Score  
142.43

m/z  
757.43

Gene names  
RPL5

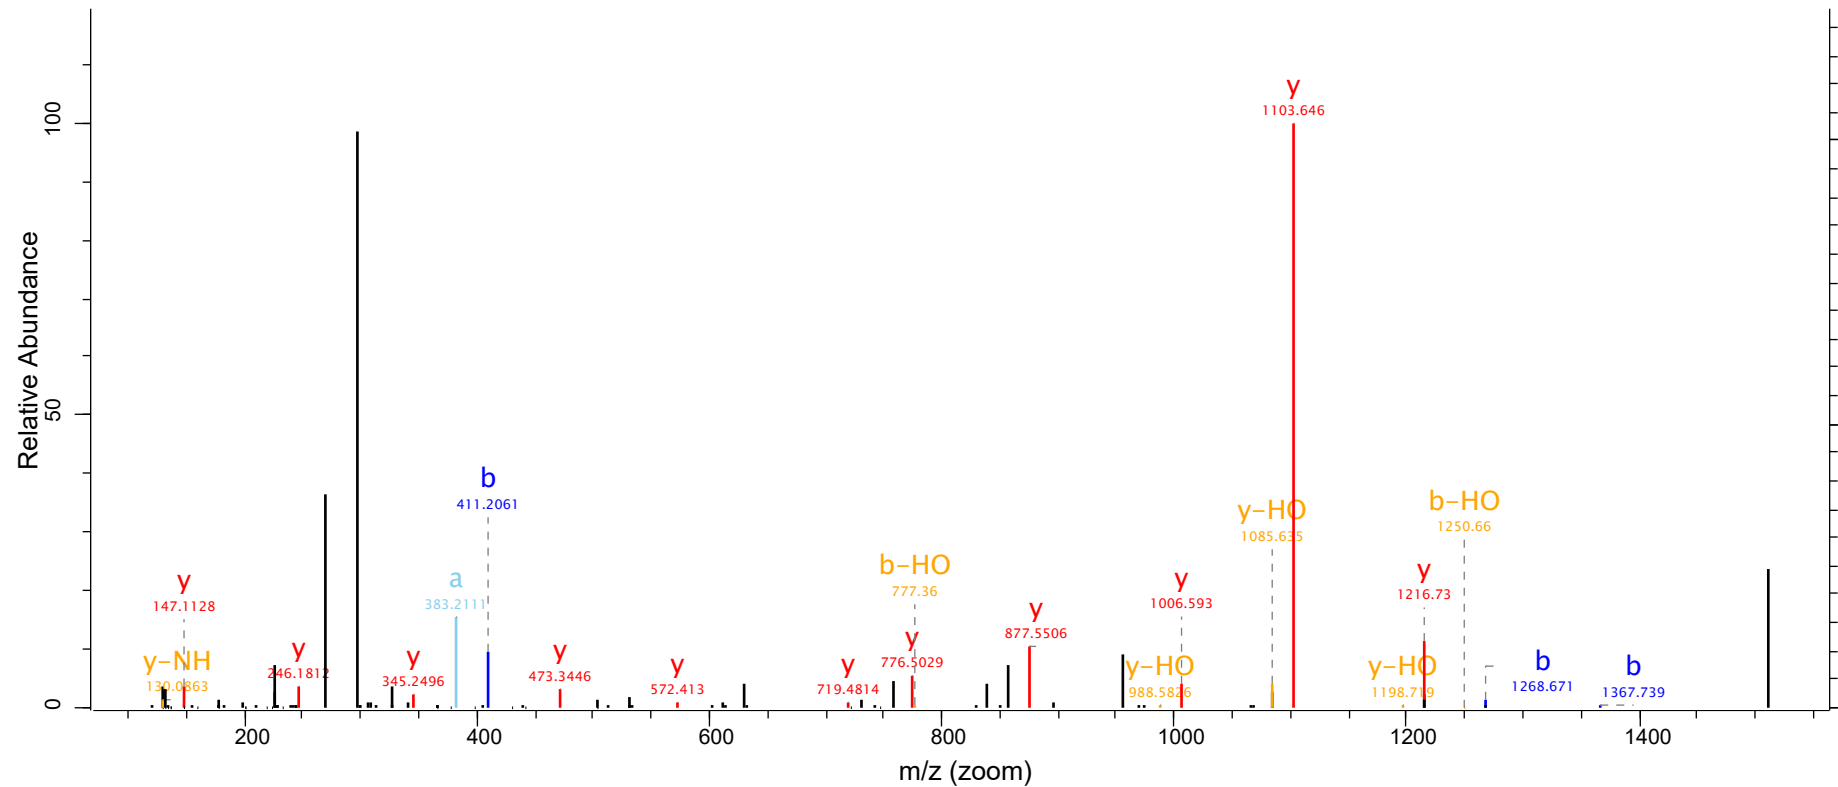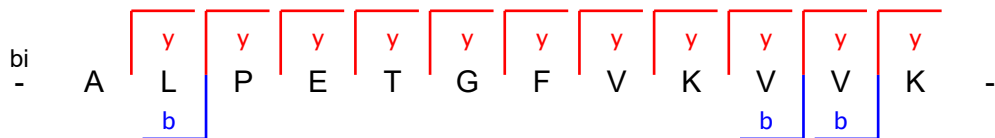

Raw File  
agg\_pep\_sort\_pos\_3

Scan  
12249

Method  
FTMS; HCD

Score  
174.39

m/z  
974.45

Gene names  
PSMC1

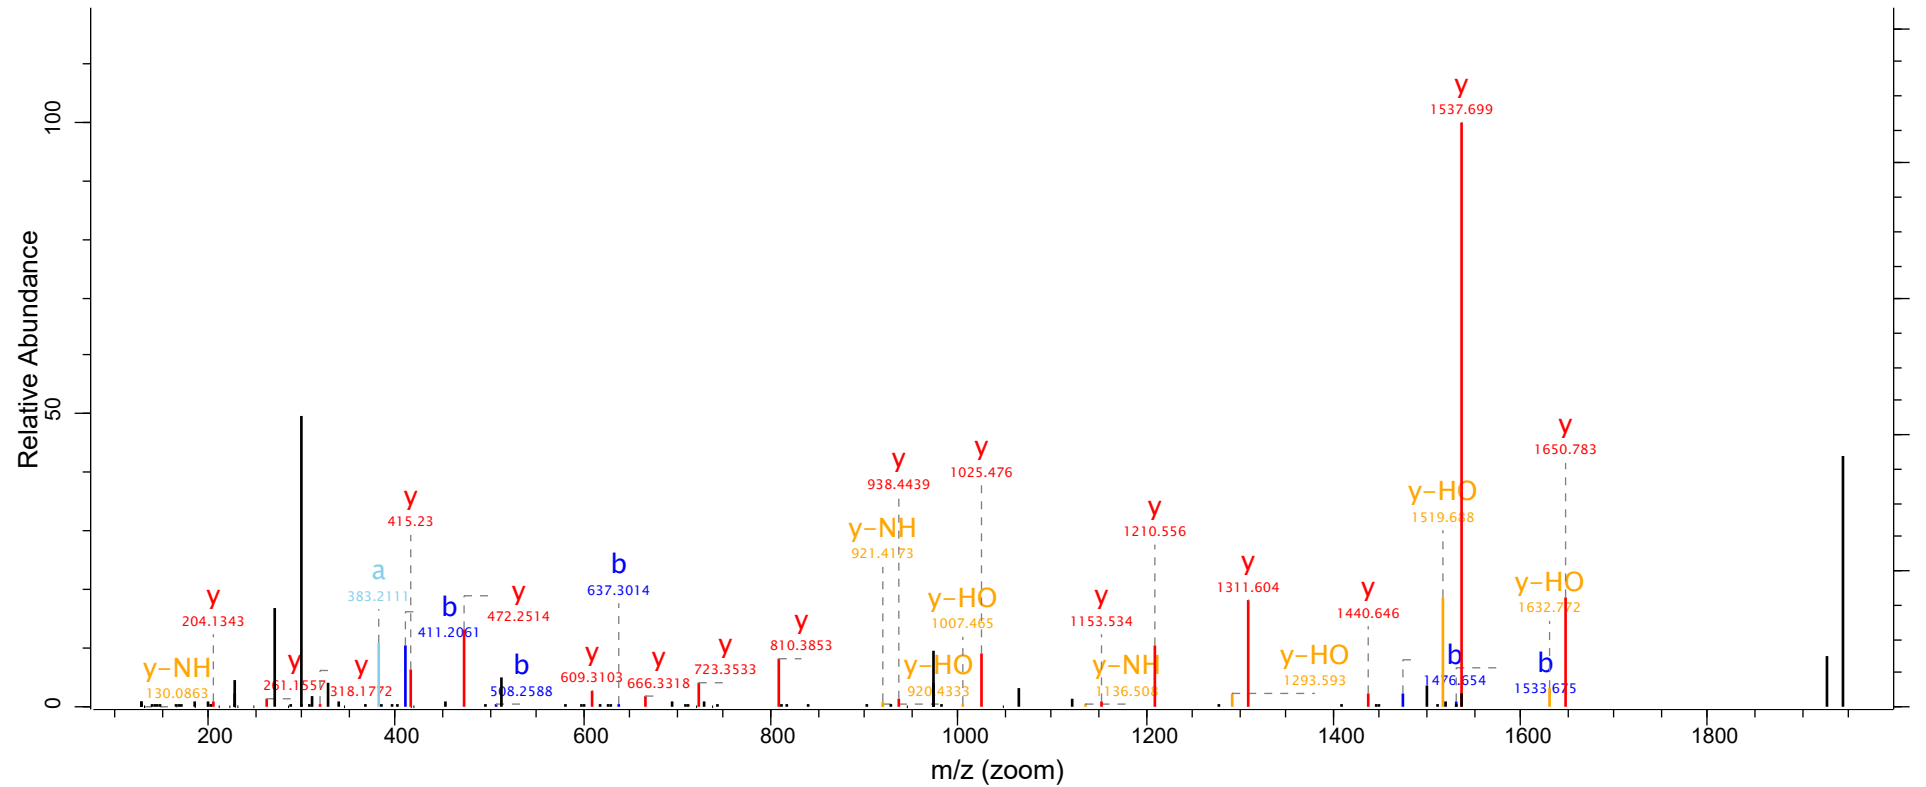

bi

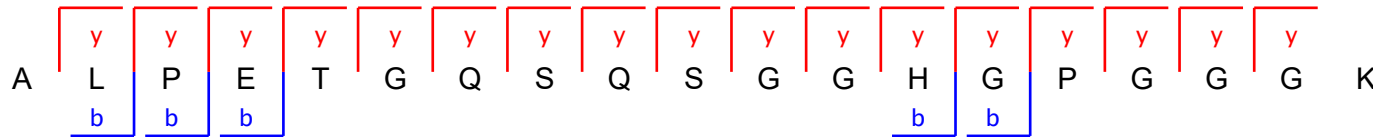

Raw File  
agg\_pep\_sort\_pos\_1

Scan  
8569

Method  
FTMS; HCD

Score  
117.38

m/z  
609.54

Gene names  
PSMC1

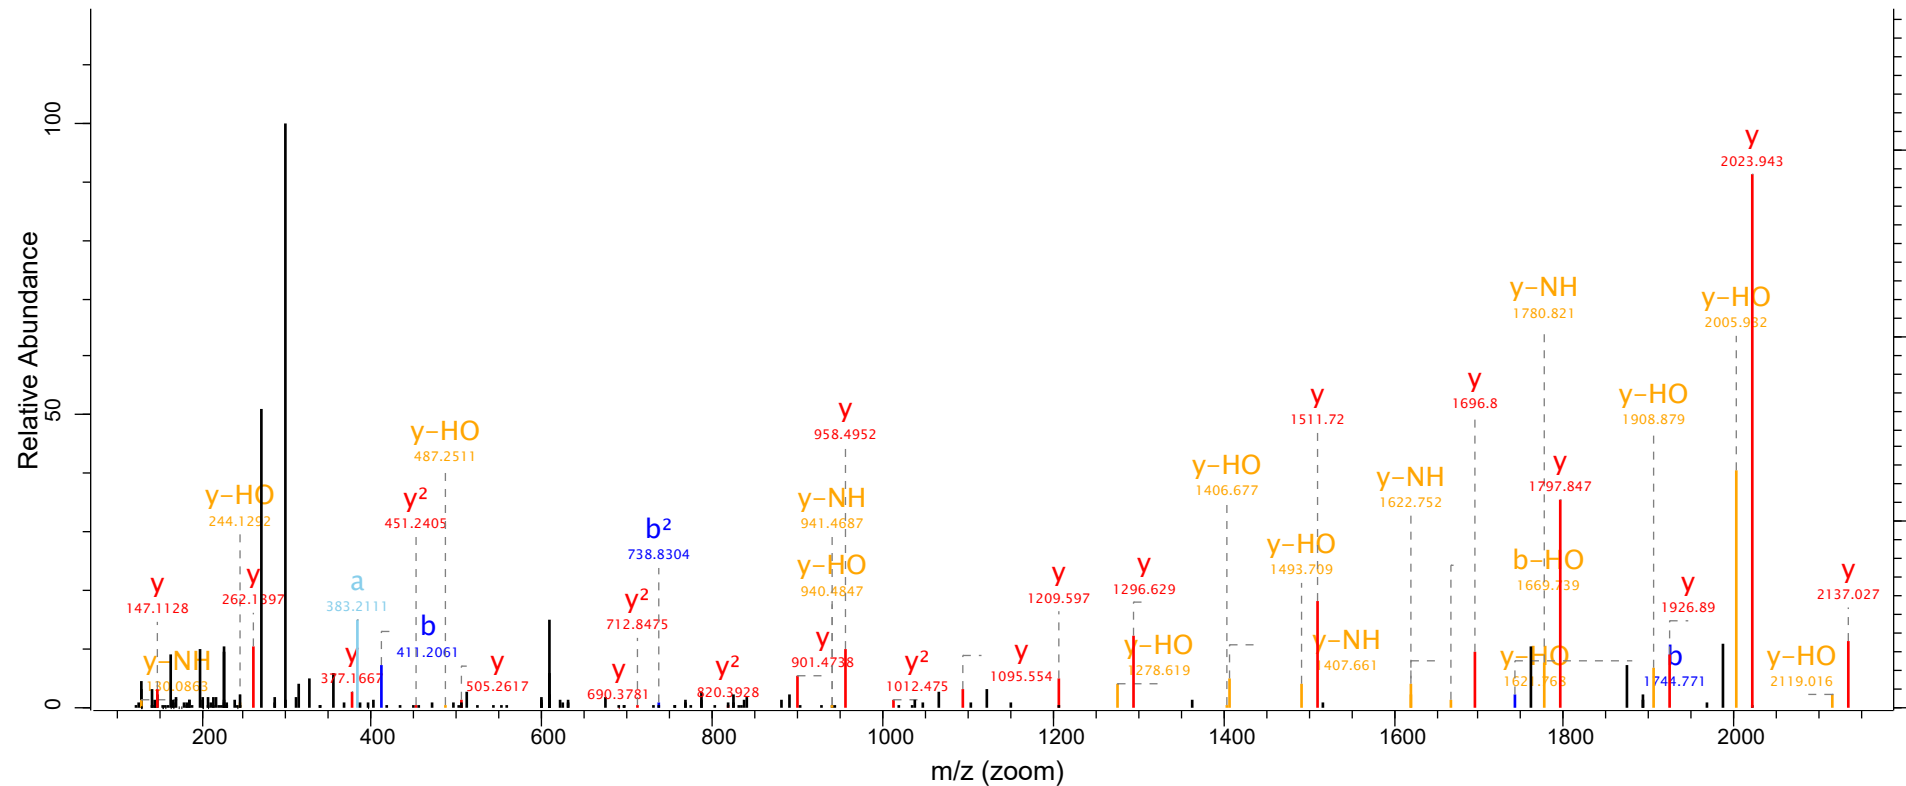

bi

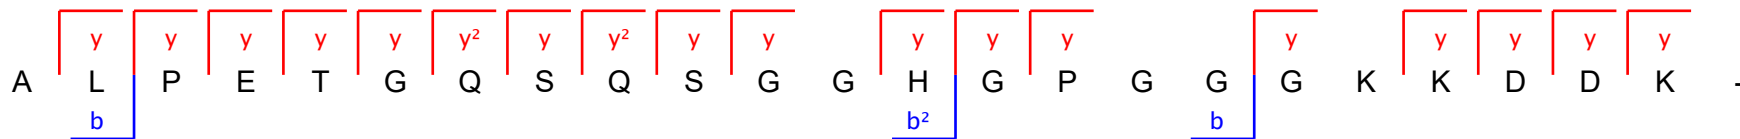

Raw File  
agg\_pep\_sort\_pos\_2

Scan  
9365

Method  
FTMS; HCD

Score  
95.21

m/z  
693

Gene names  
PSMC1

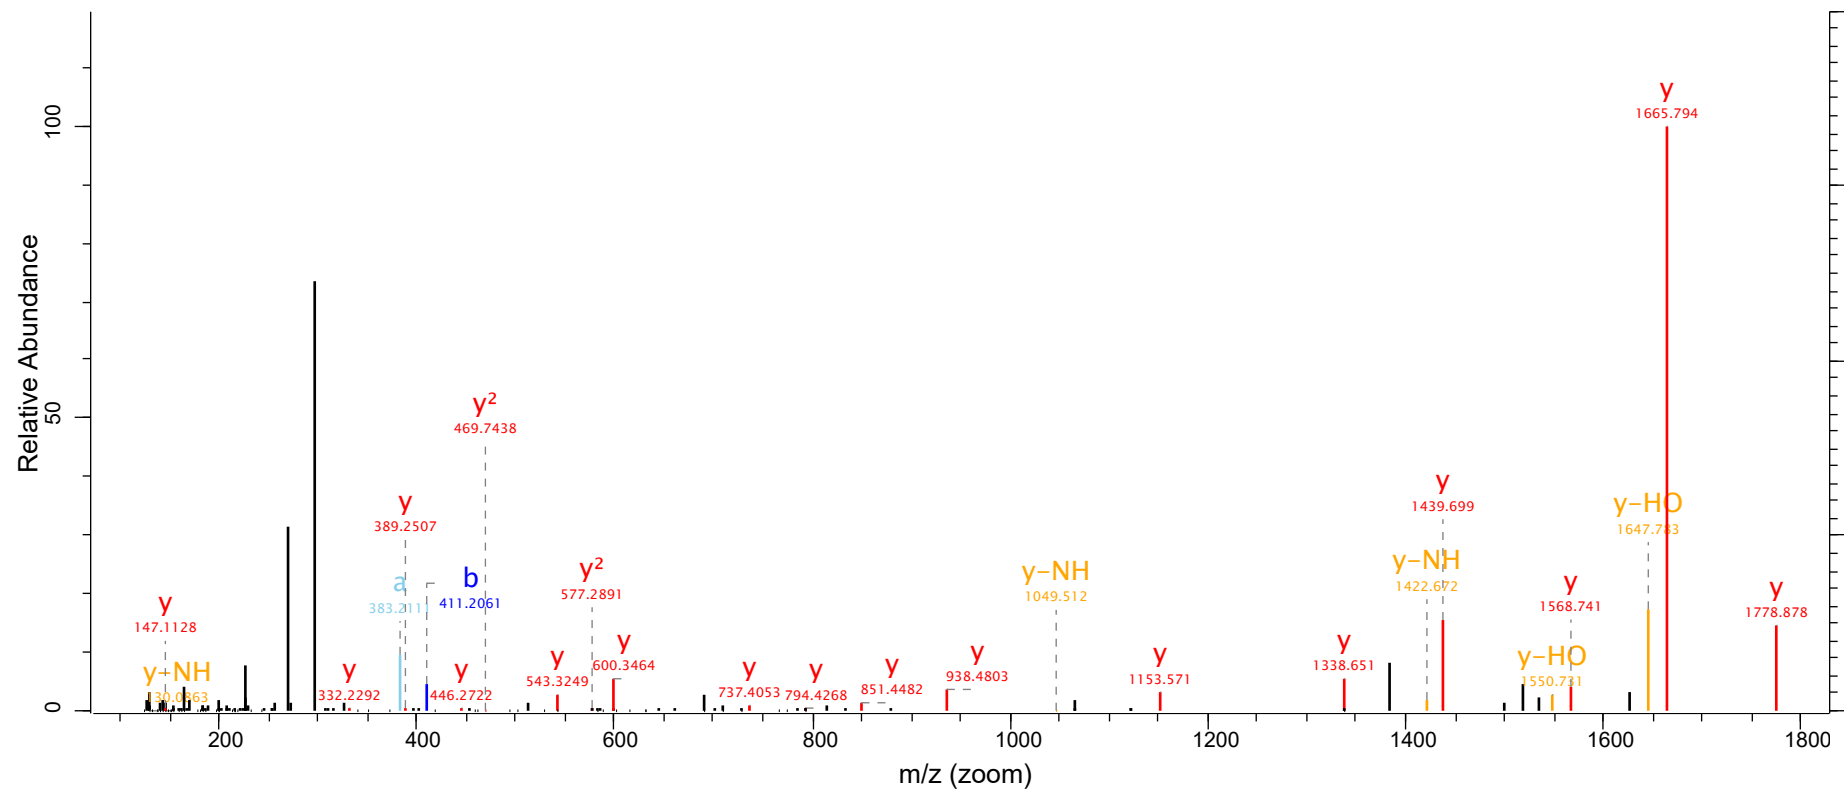

bi

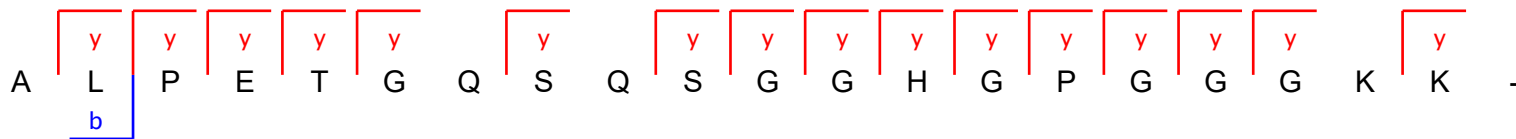



Raw File  
agg\_pep\_sort\_pos\_3

Scan  
19264

Method  
FTMS; HCD

Score  
68.54

m/z  
784.87

Gene names  
RBM7

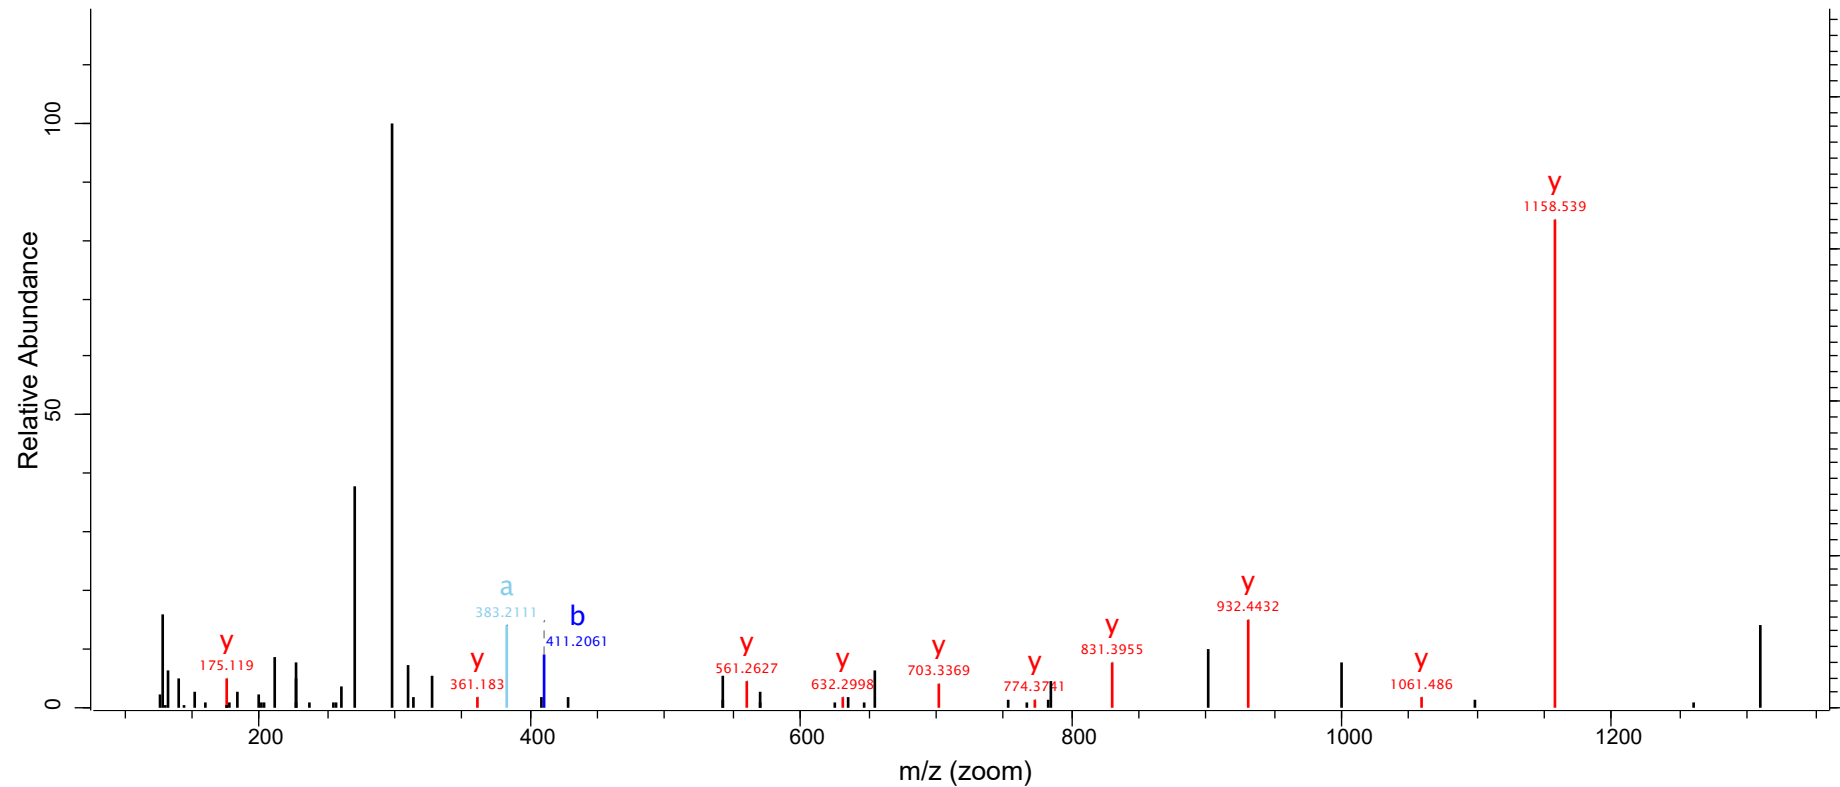

bi -  
A L P E T G A A A E A D R -  
b

Raw File  
agg\_pep\_sort\_pos\_2

Scan  
15298

Method  
FTMS; HCD

Score  
89.91

m/z  
638

Gene names  
RFTN1

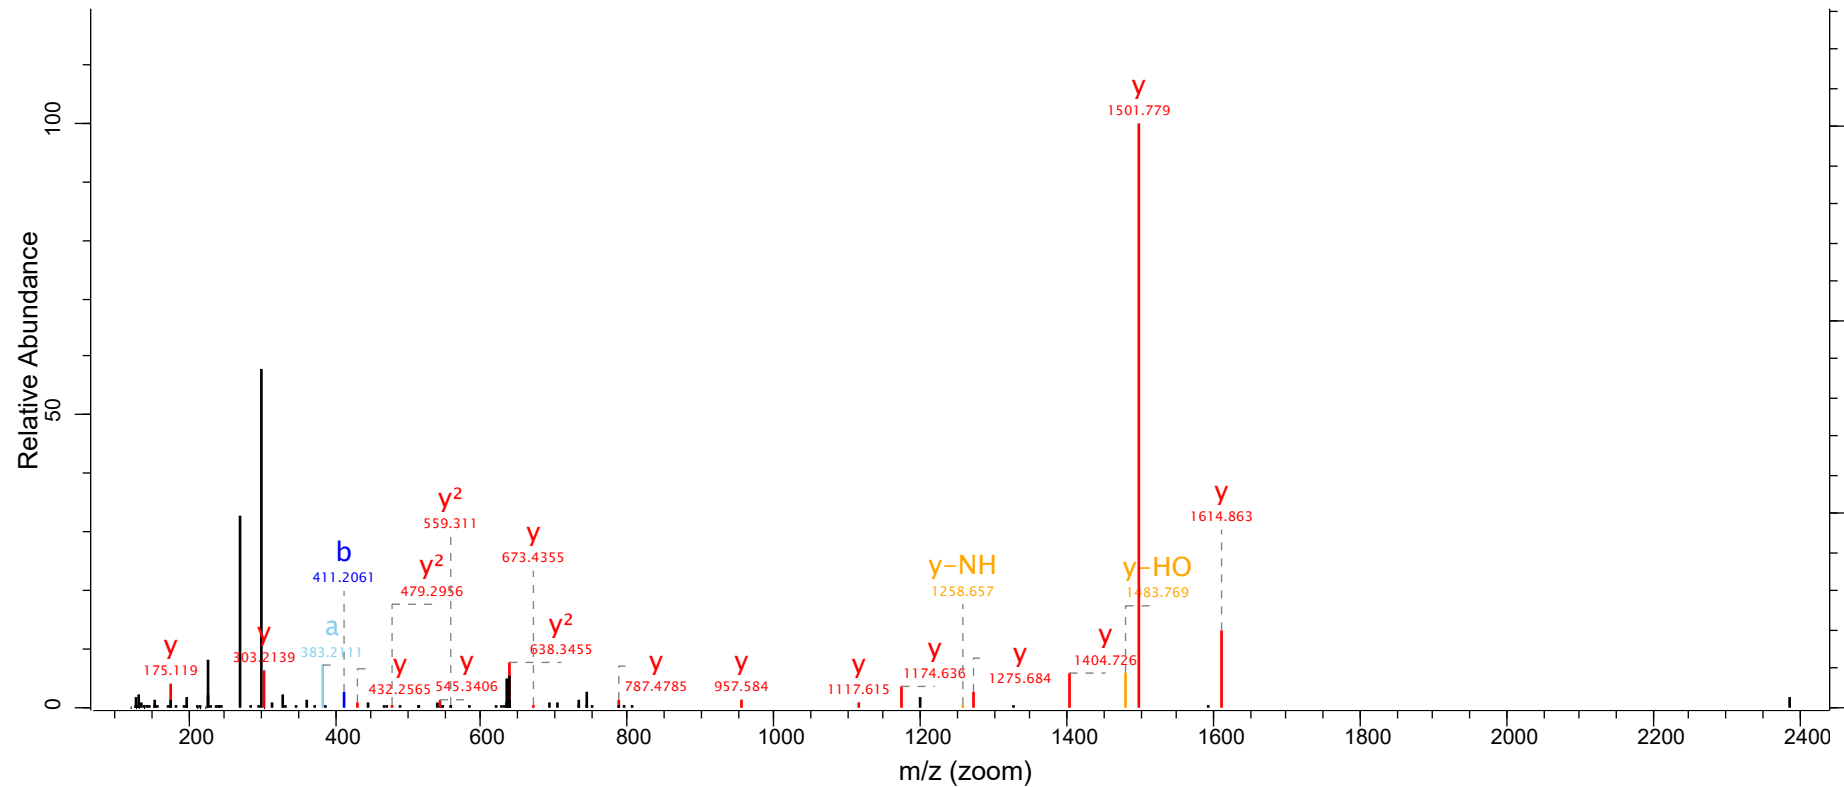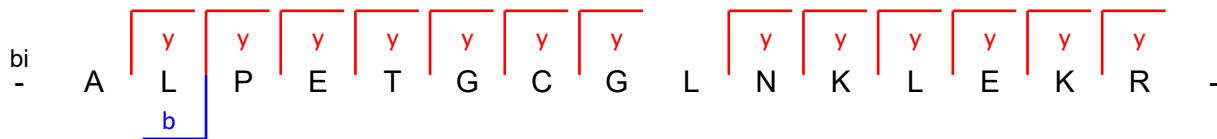

Raw File  
agg\_pep\_sort\_pos\_3

Scan  
17788

Method  
FTMS; HCD

Score  
108.56

m/z  
878.44

Gene names  
RFTN1

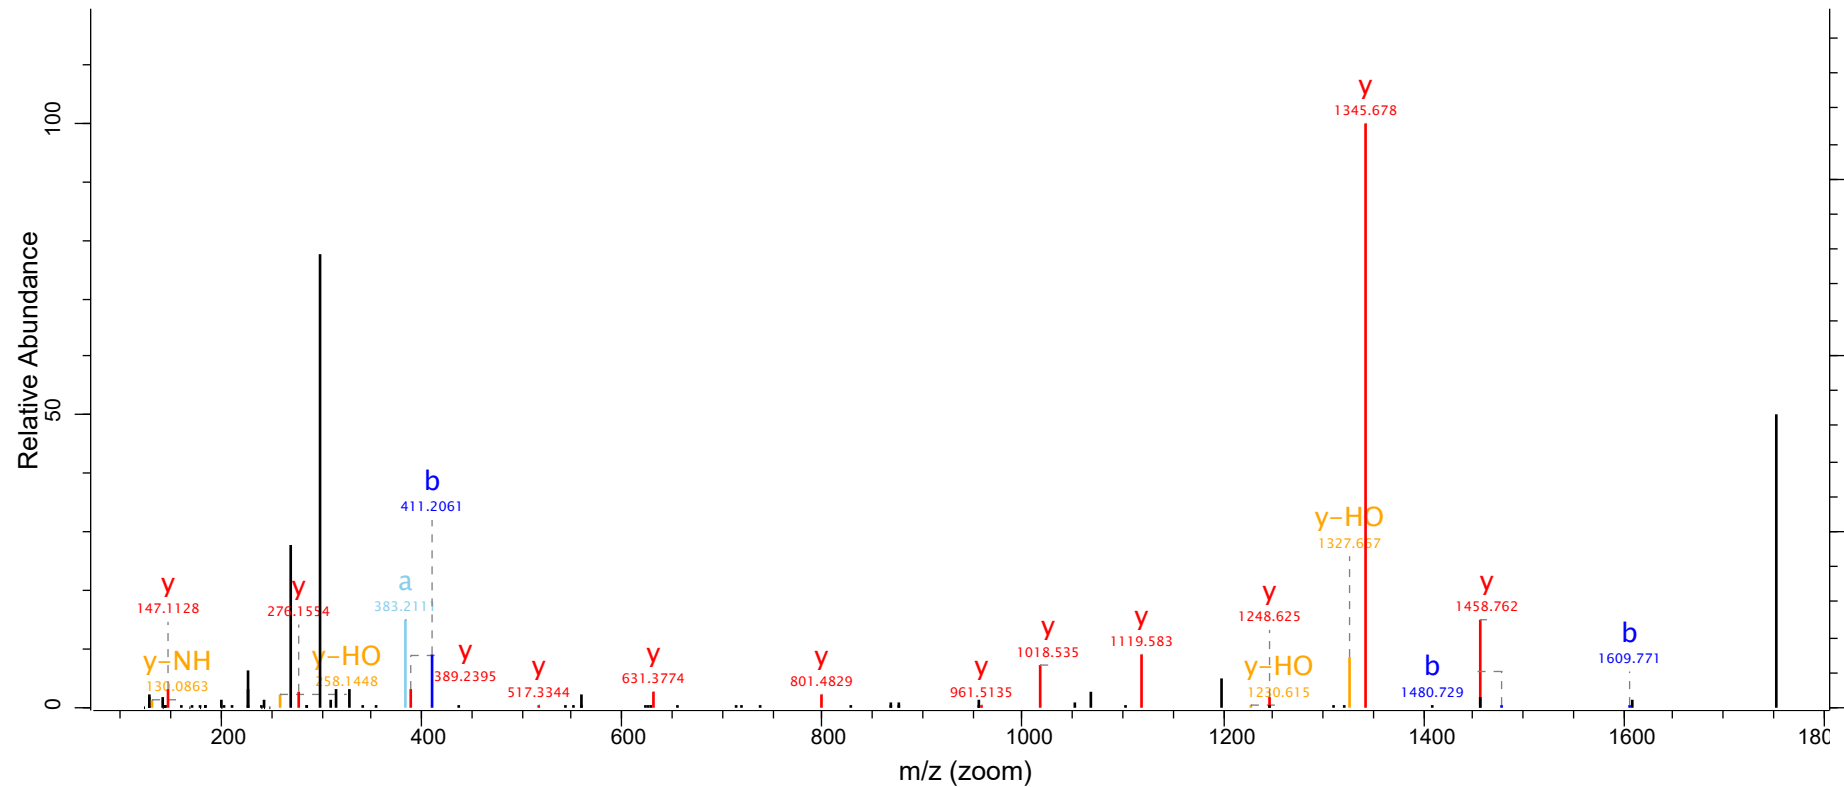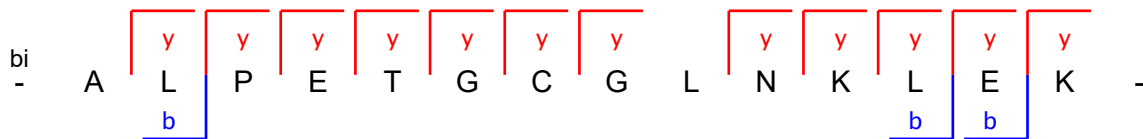

Raw File  
agg\_pep\_sort\_pos\_3

Scan  
18976

Method  
FTMS; HCD

Score  
80.24

m/z  
693.33

Gene names  
RFTN1

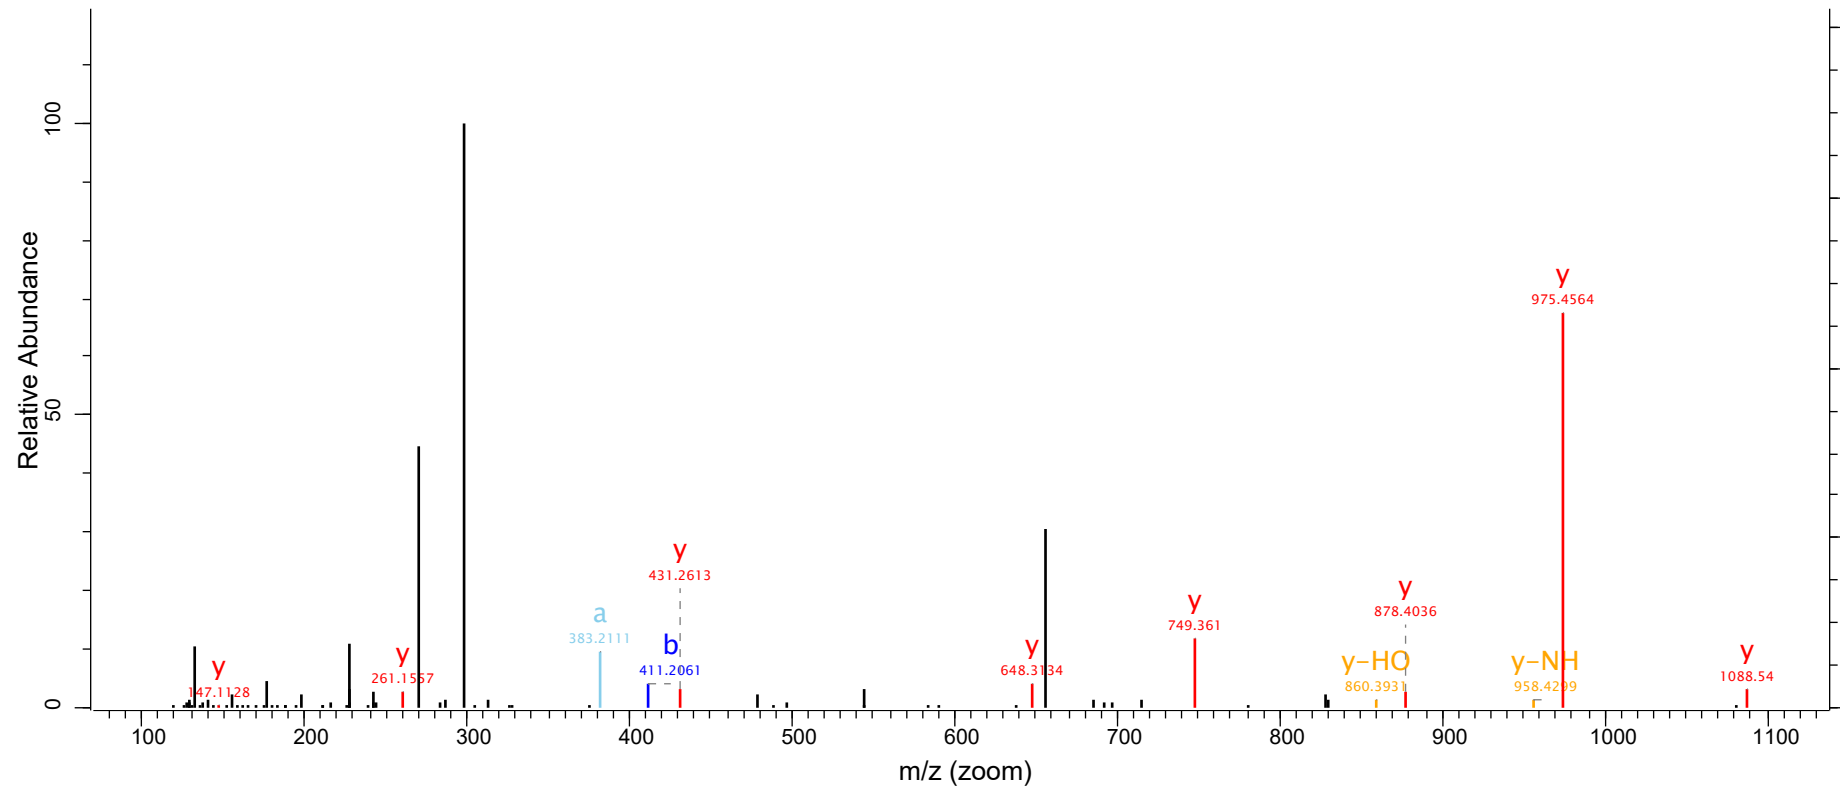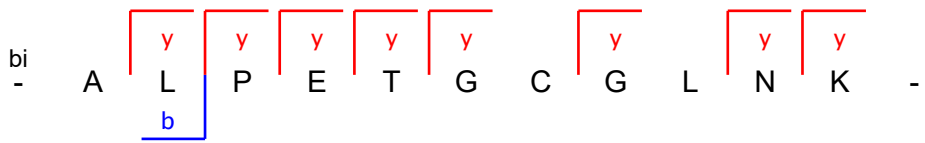

Raw File  
agg\_pep\_sort\_pos\_2

Scan  
14730

Method  
FTMS; HCD

Score  
96.14

m/z  
727.4

Gene names  
RIOK2

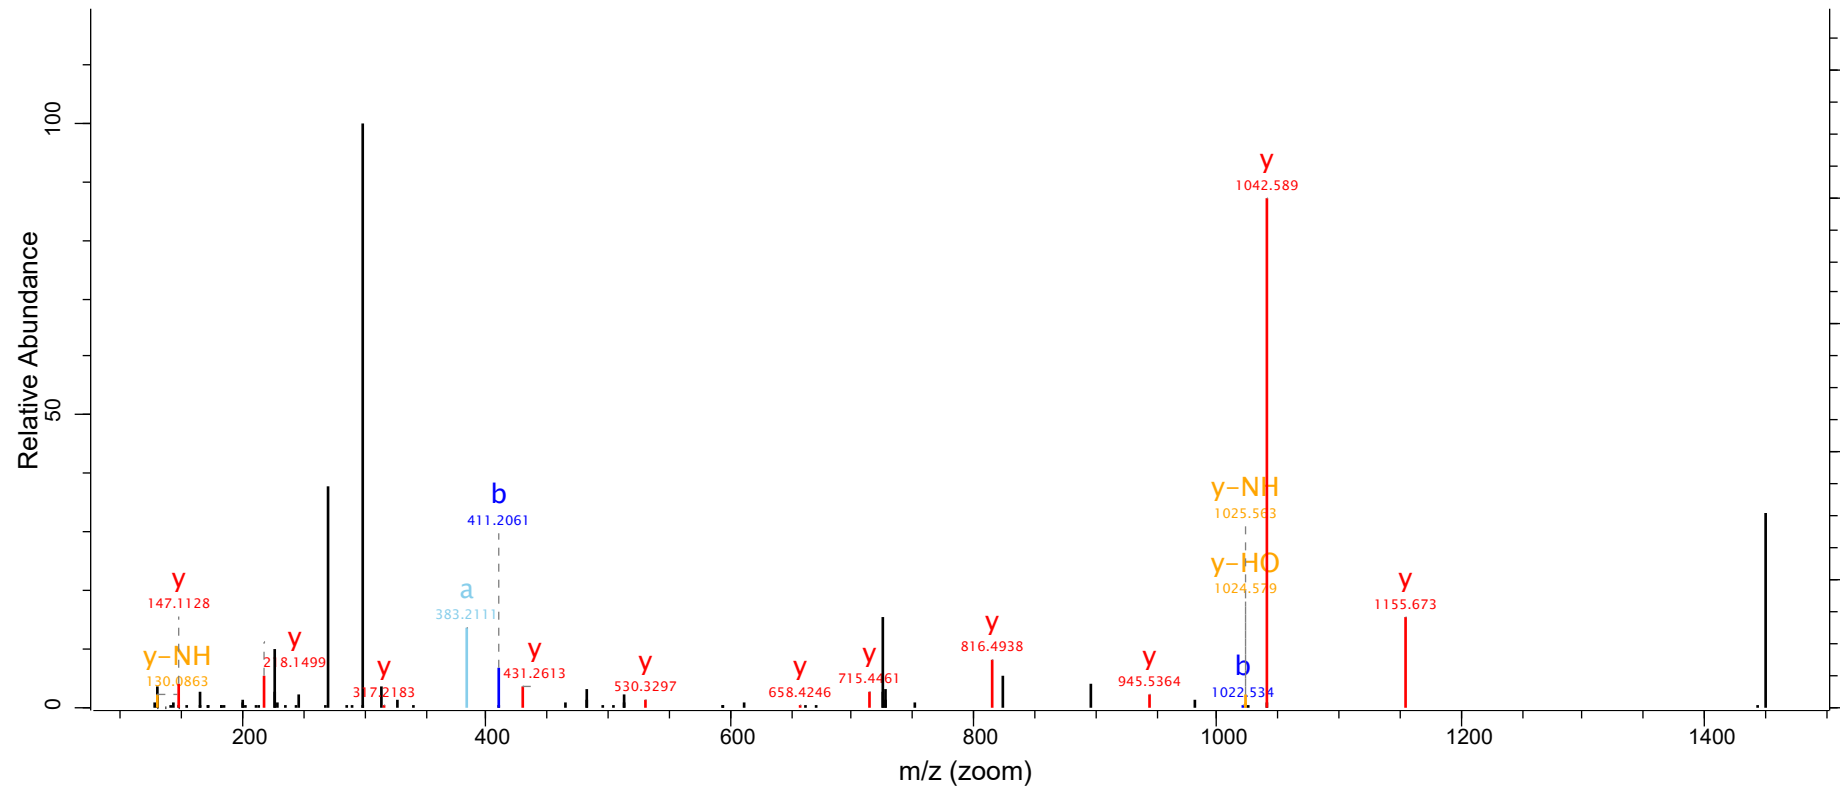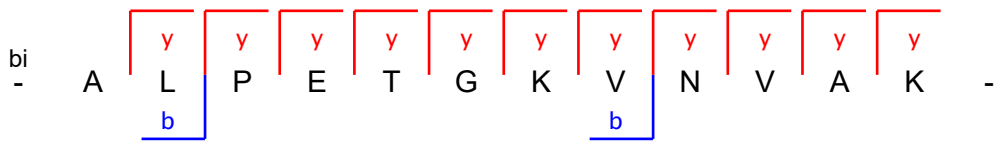

Raw File  
agg\_pep\_sort\_pos\_1

Scan  
9890

Method  
FTMS; HCD

Score  
68.89

m/z  
483.93

Gene names  
RPL10L;RPL10

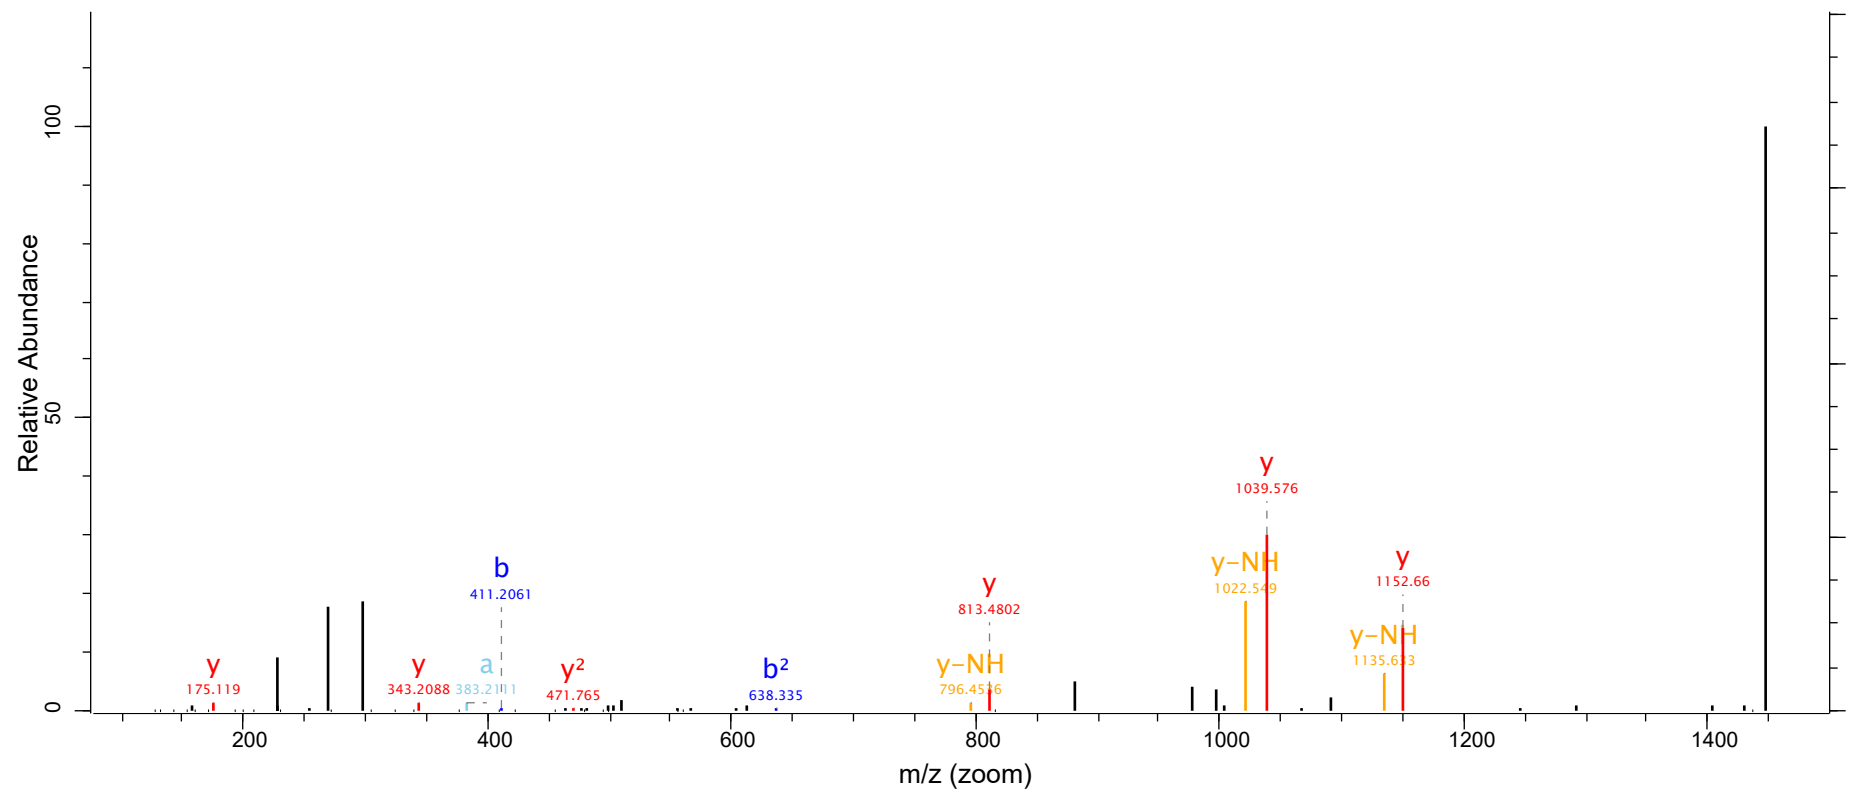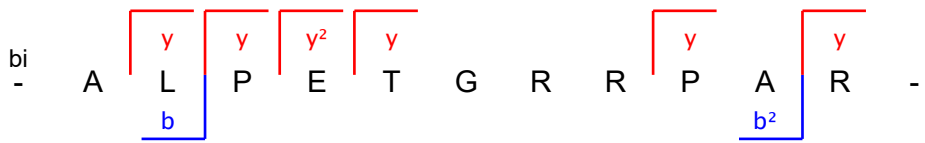

Raw File  
agg\_pep\_sort\_pos\_3

Scan  
22319

Method  
FTMS; HCD

Score  
76.83

m/z  
648.84

Gene names  
RPL18

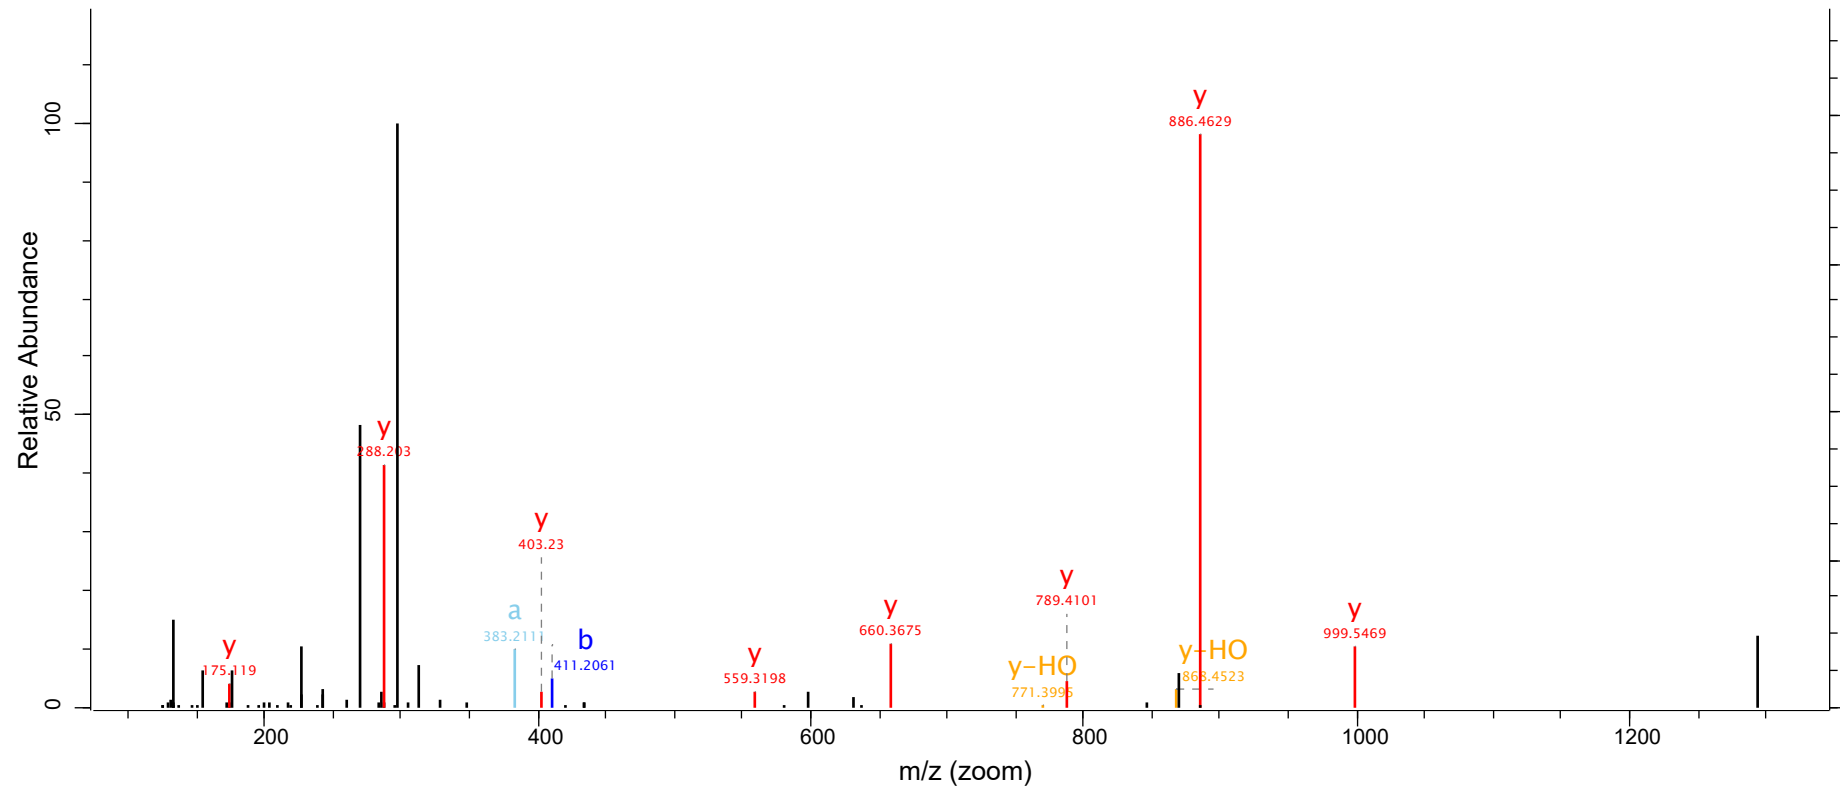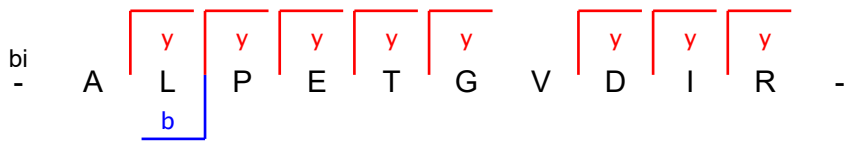

Raw File  
agg\_pep\_sort\_pos\_2

Scan  
22697

Method  
FTMS; HCD

Score  
95.53

m/z  
594.31

Gene names  
RPL5

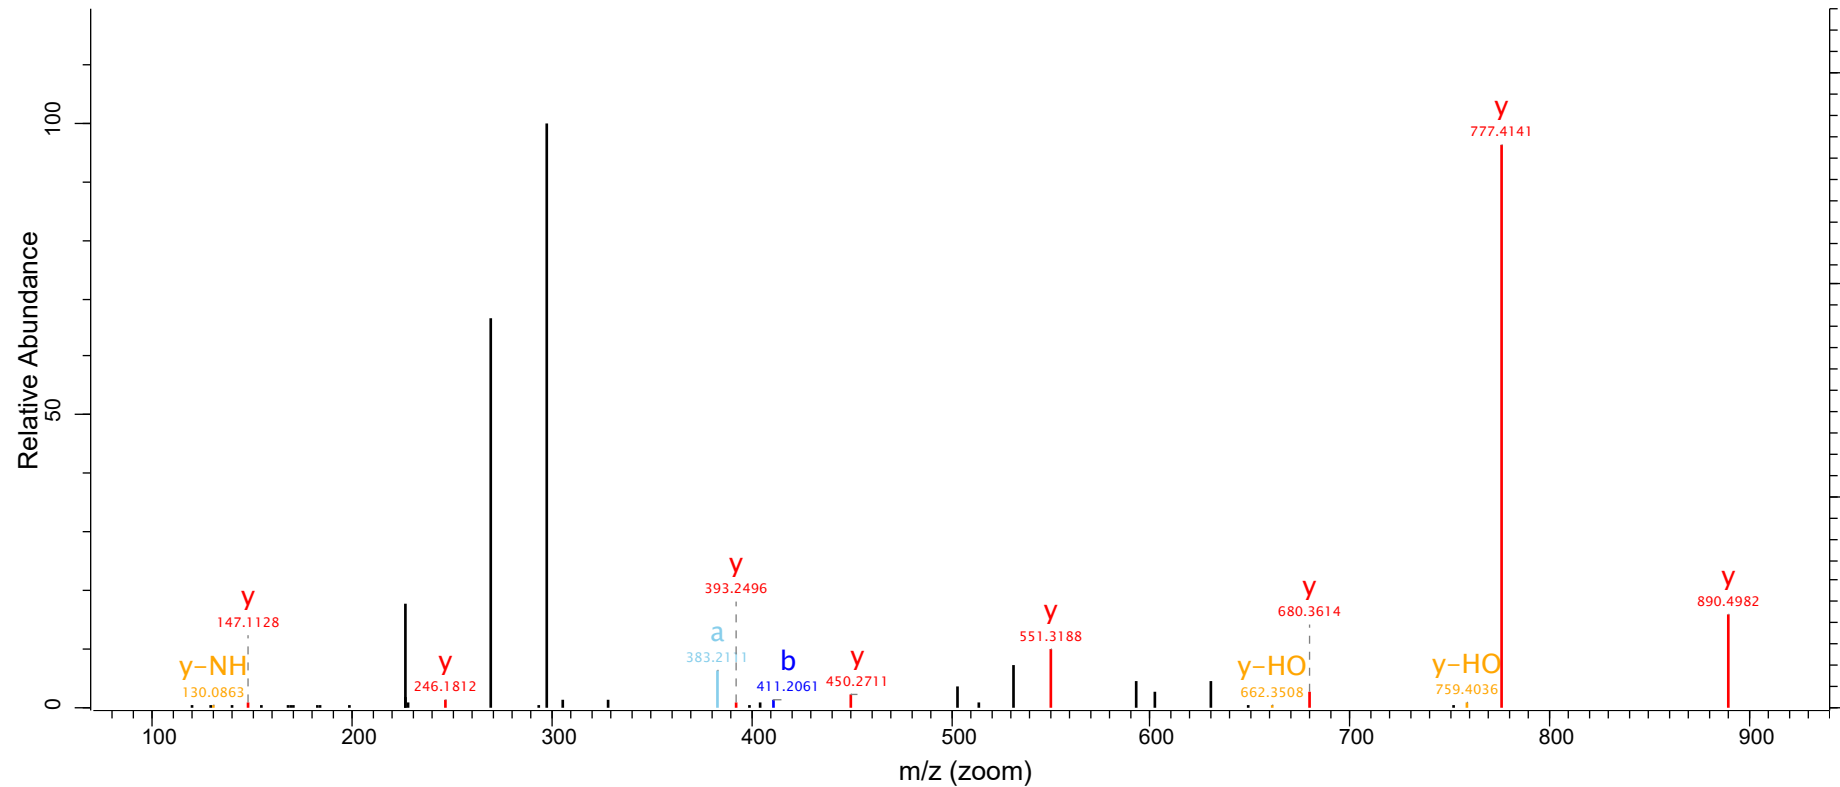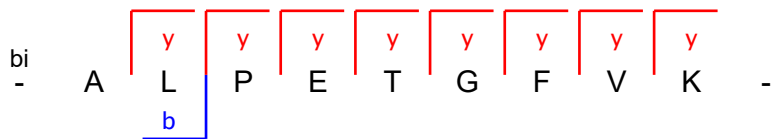



Raw File  
agg\_pep\_sort\_pos\_3

Scan  
12082

Method  
FTMS; HCD

Score  
109.86

m/z  
629.31

Gene names  
RPS23

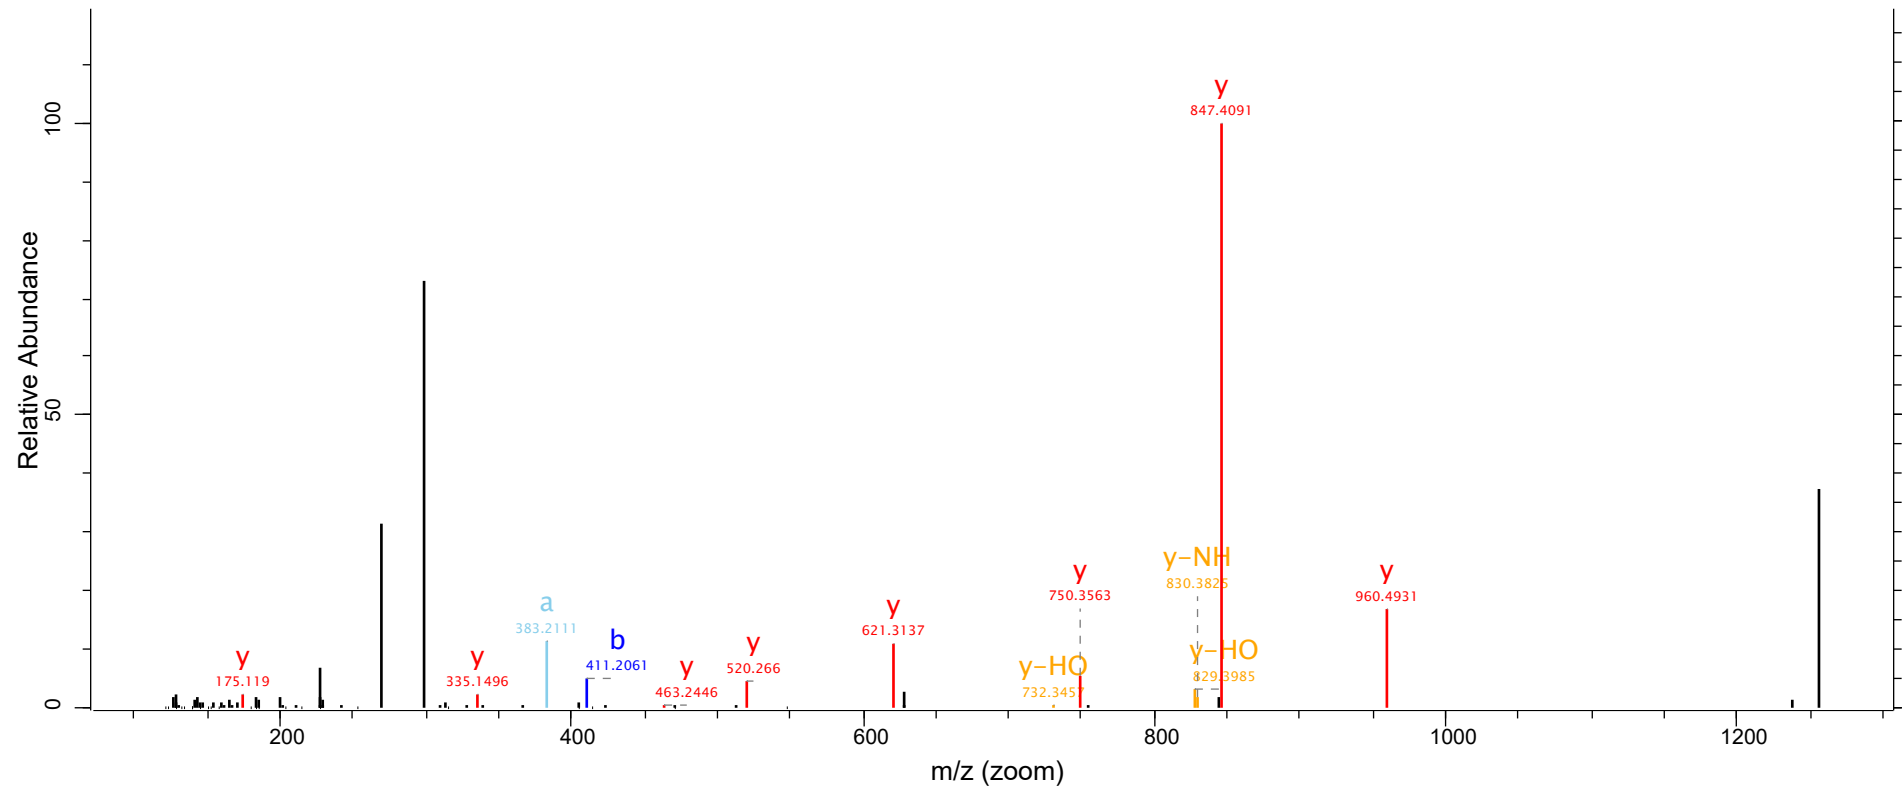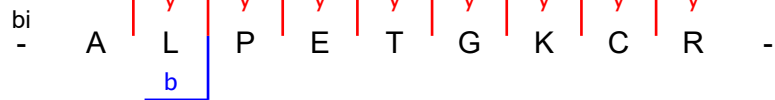

Raw File  
agg\_pep\_sort\_pos\_2

Scan  
17042

Method  
FTMS; HCD

Score  
128.9

m/z  
716.35

Gene names  
RPS29

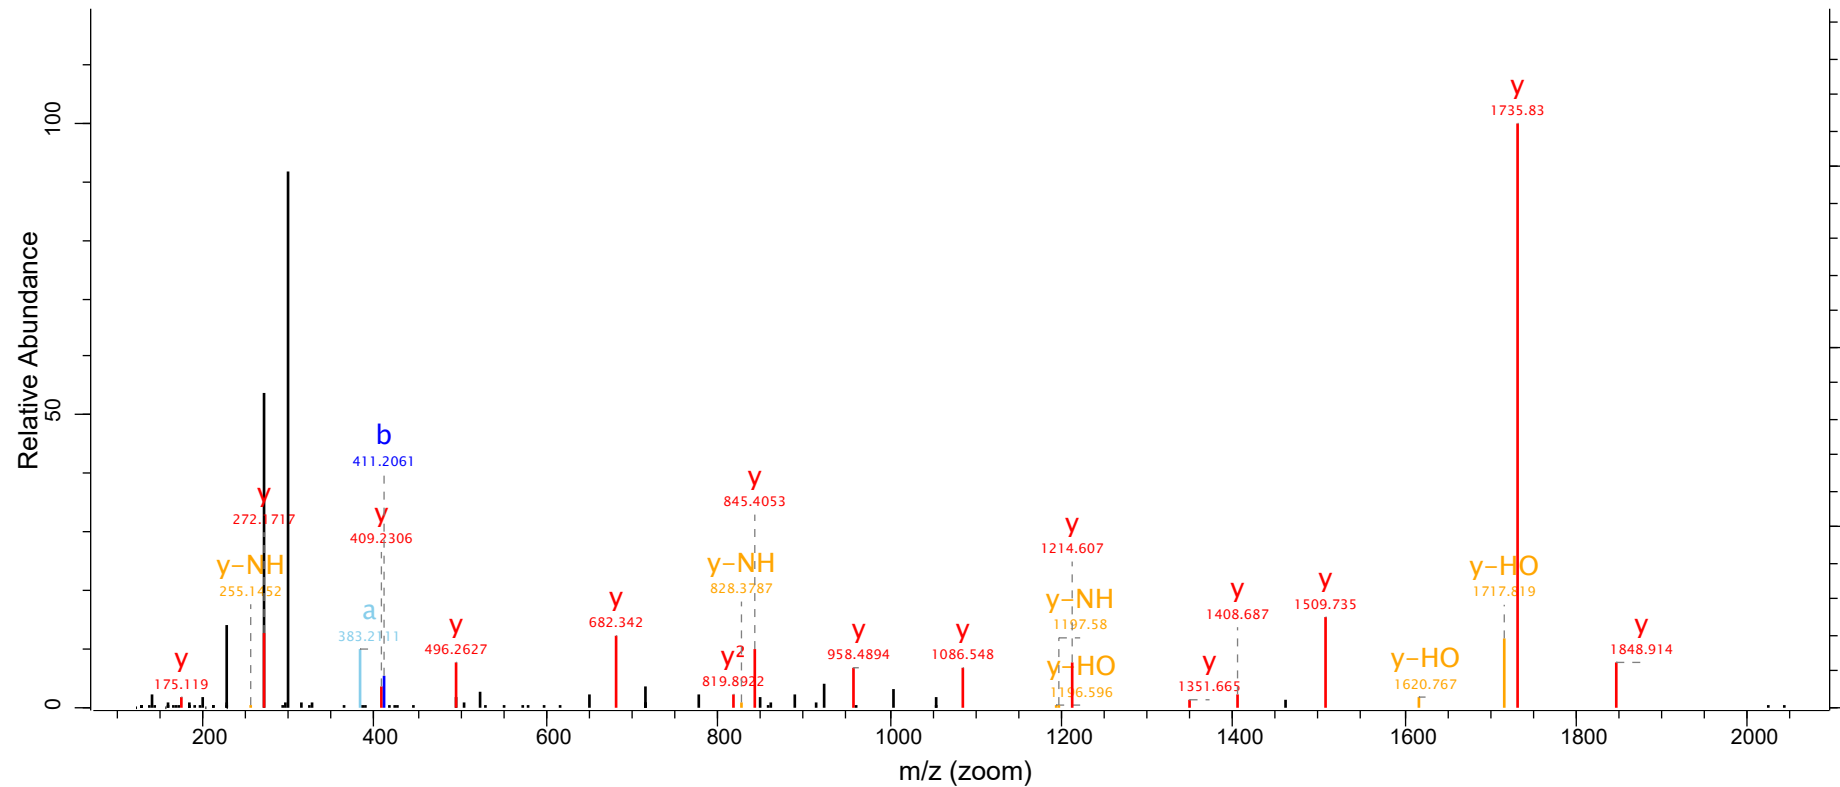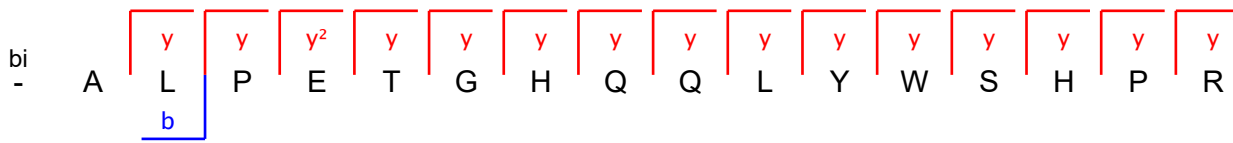

Raw File  
agg\_pep\_sort\_pos\_2

Scan  
15731

Method  
FTMS; HCD

Score  
80.76

m/z  
899.43

Gene names  
RTFDC1

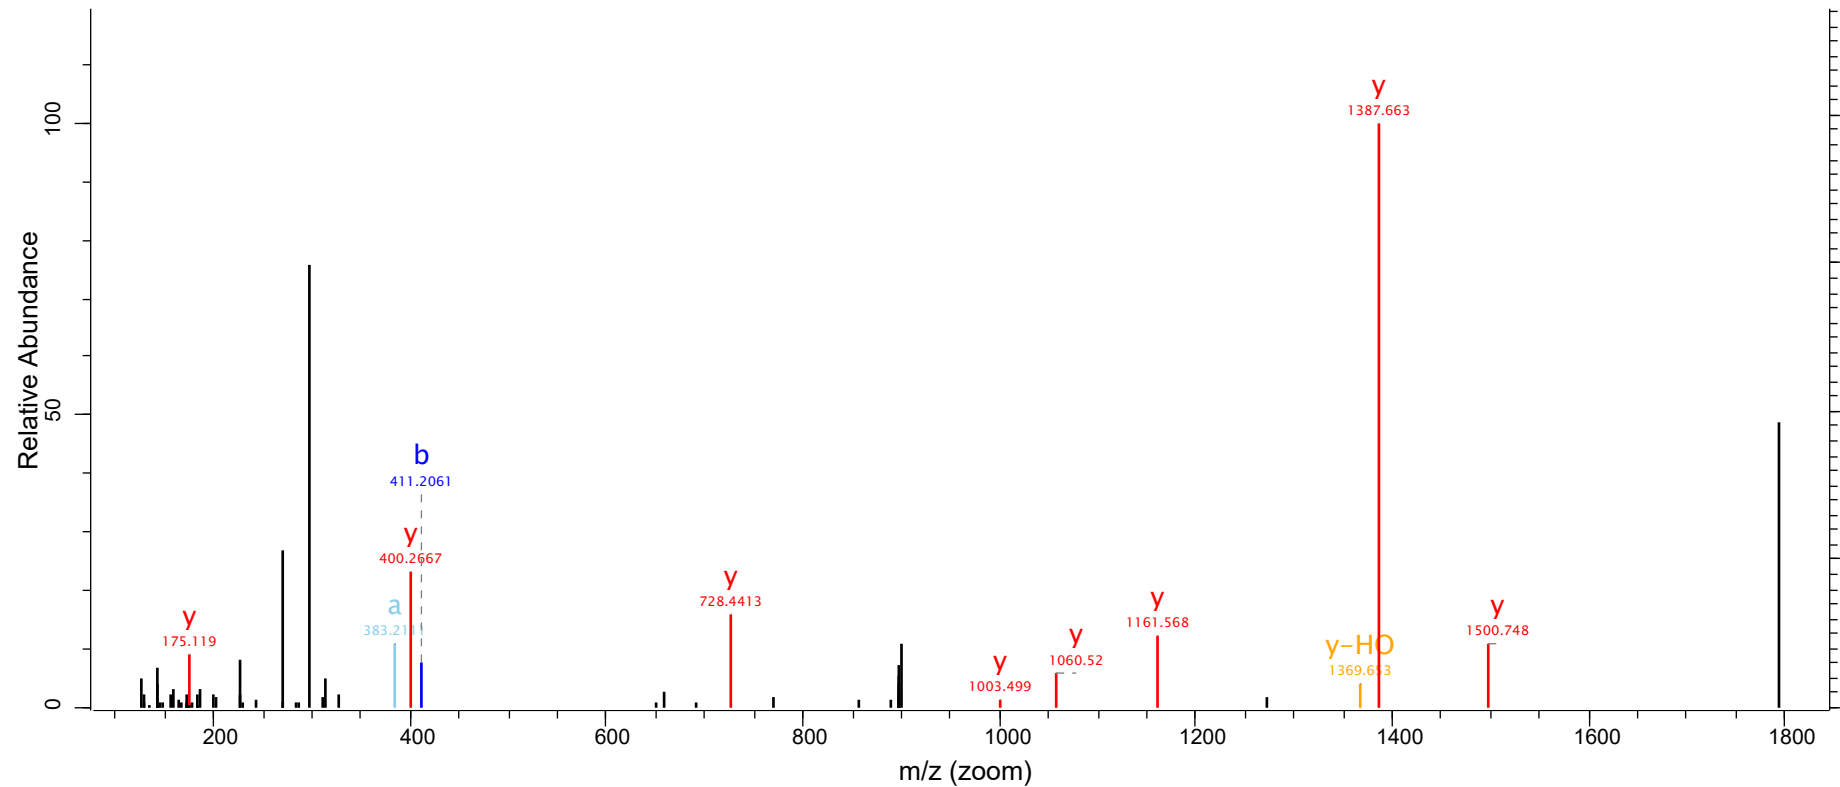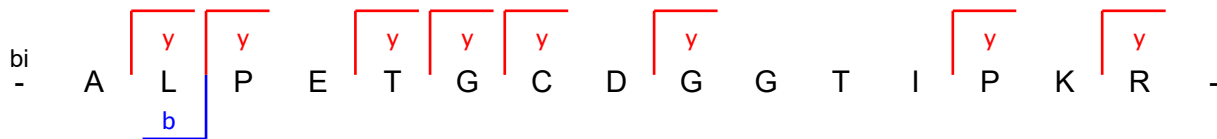

Raw File  
agg\_pep\_sort\_pos\_2

Scan  
20000

Method  
FTMS; HCD

Score  
113.63

m/z  
821.38

Gene names  
RTFDC1

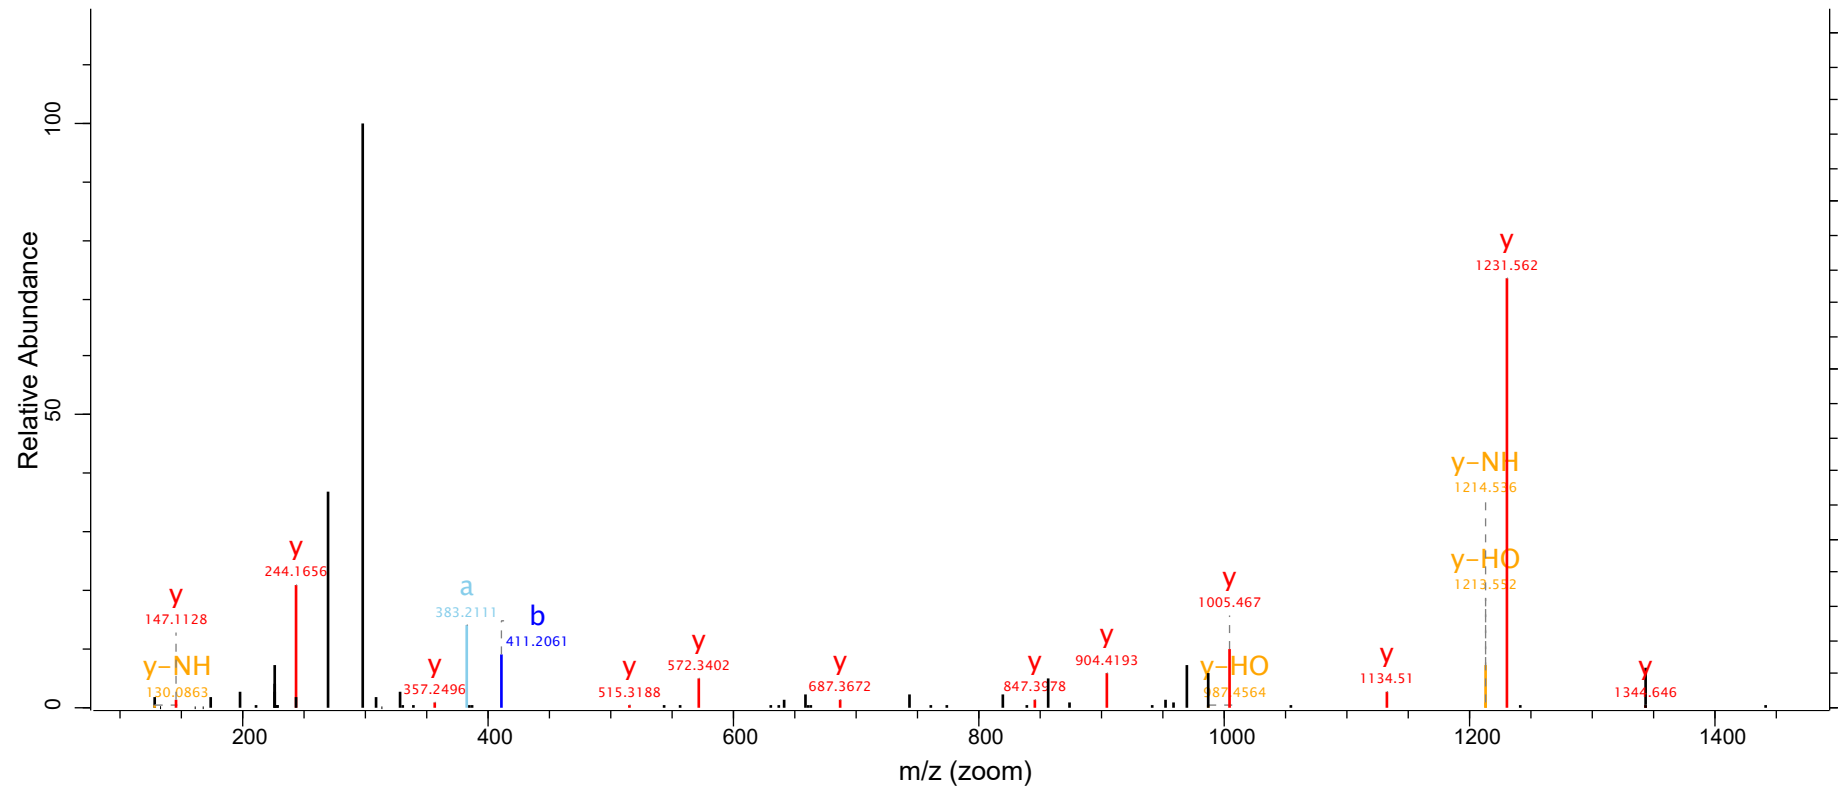

bi

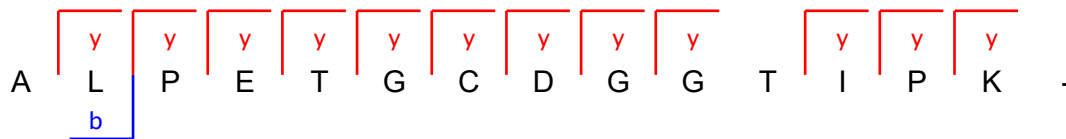

Raw File  
agg\_pep\_sort\_pos\_1

Scan  
16795

Method  
FTMS; HCD

Score  
76.83

m/z  
735.38

Gene names  
S100A8

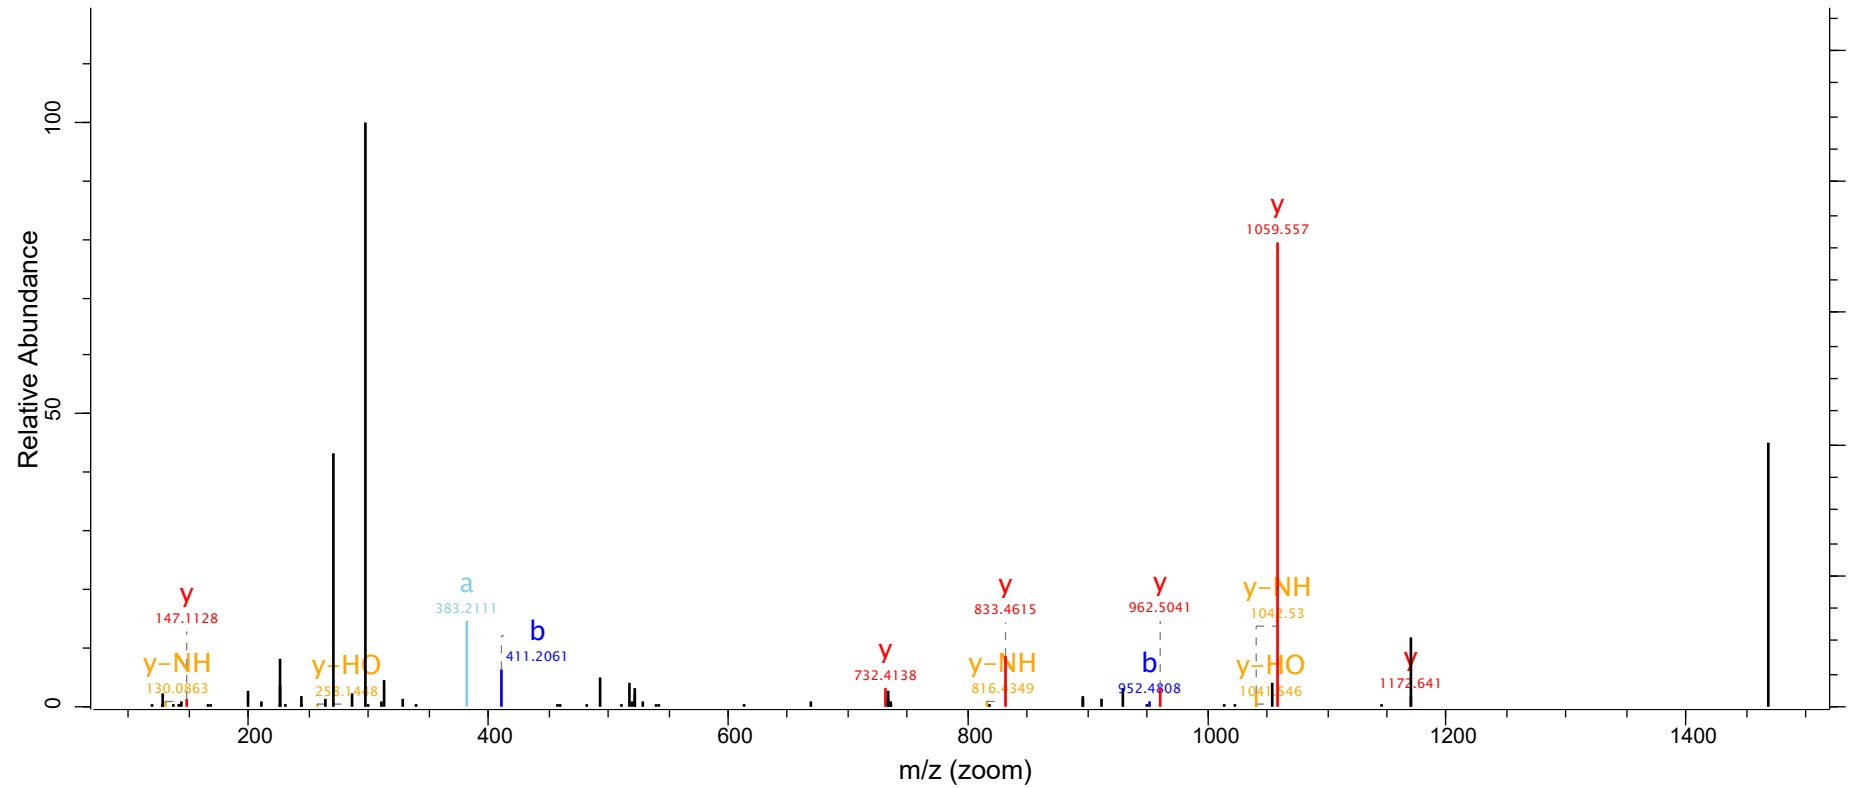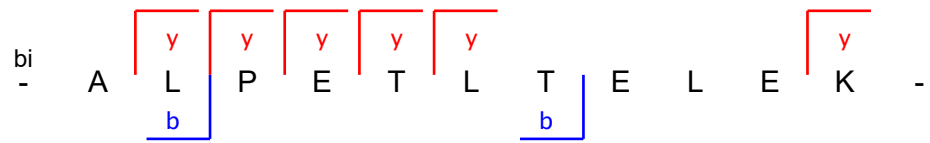

Raw File  
agg\_pep\_sort\_pos\_2

Scan  
13126

Method  
FTMS; HCD

Score  
48.66

m/z  
945.11

Gene names  
SCML2

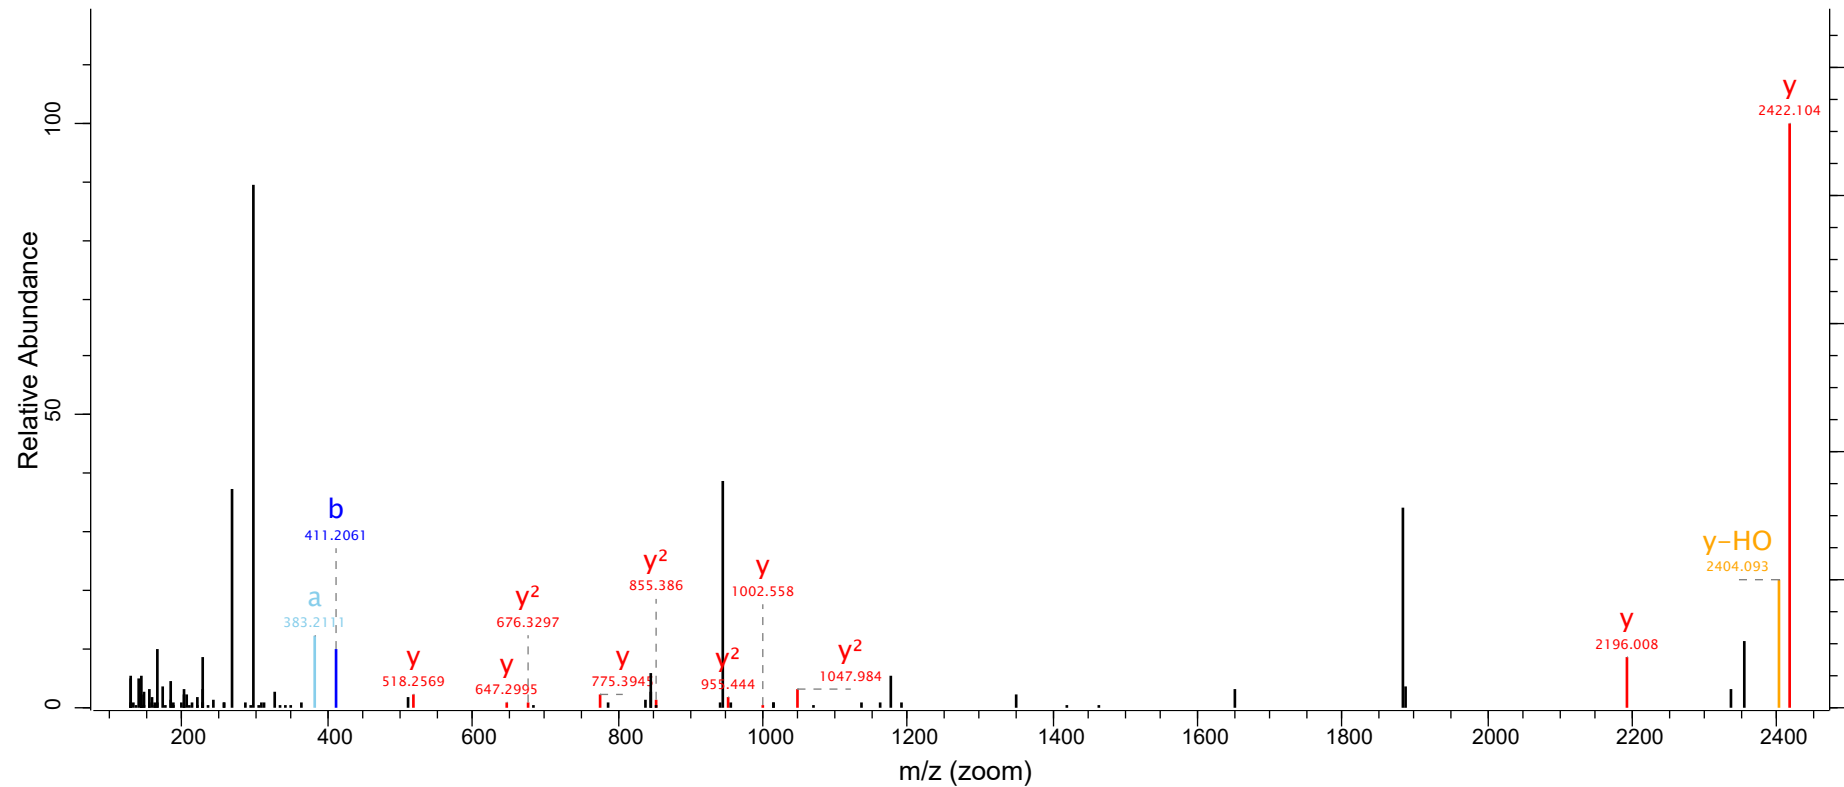

bi

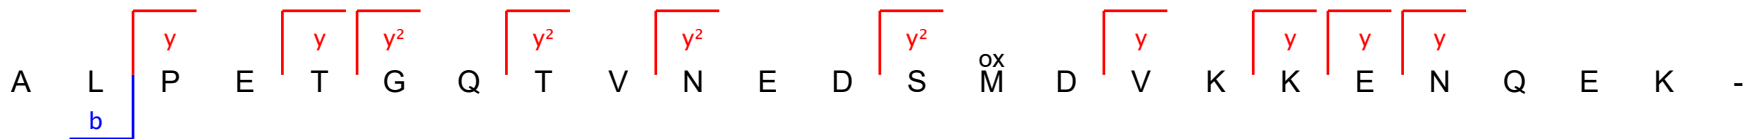

Raw File  
agg\_pep\_sort\_pos\_2

Scan  
14590

Method  
FTMS; HCD

Score  
77.85

m/z  
939.77

Gene names  
SCML2

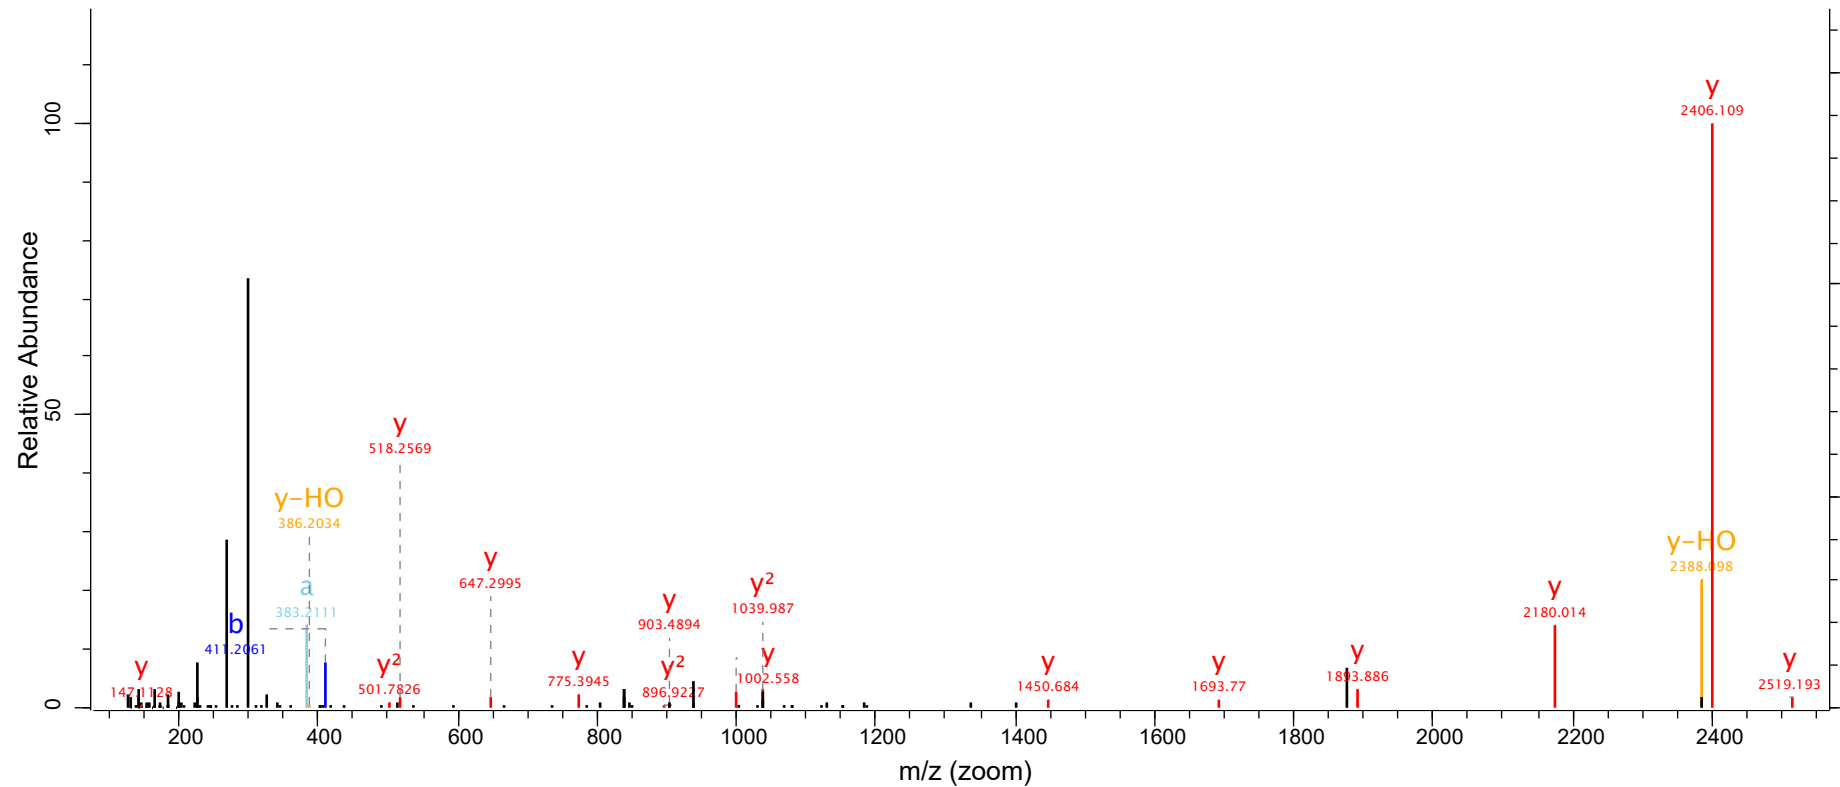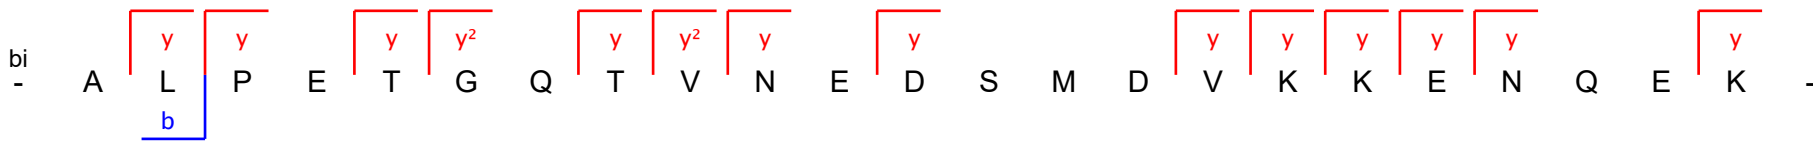

Raw File  
agg\_pep\_sort\_pos\_2

Scan  
15363

Method  
FTMS; HCD

Score  
26.84

m/z  
736.01

Gene names  
SCML2

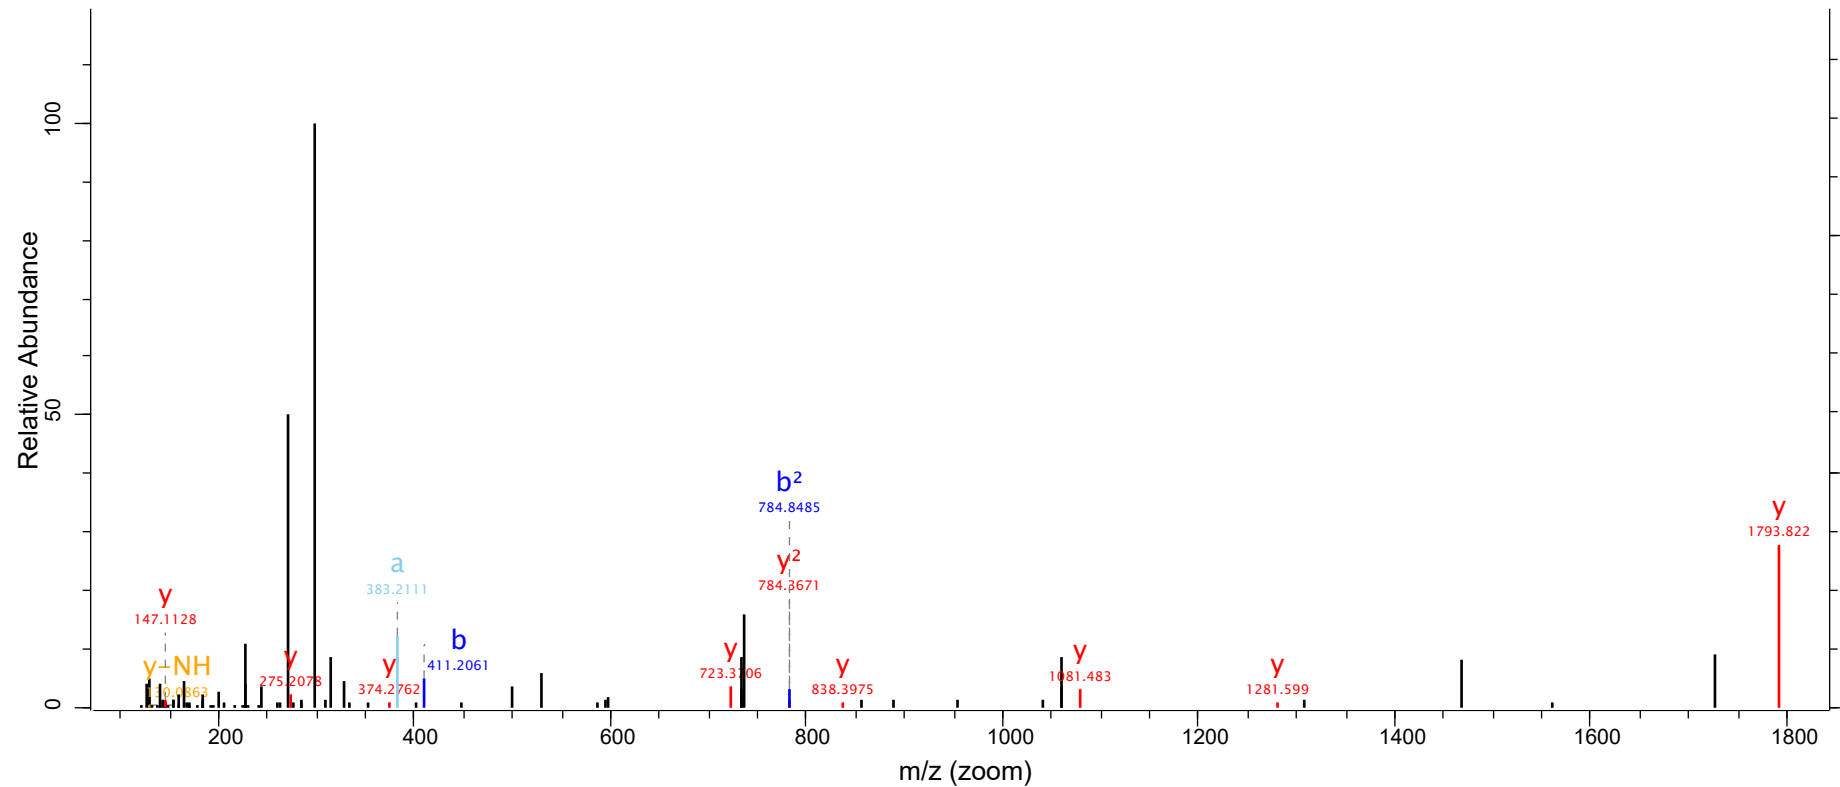

bi - A L P E T G Q T V N E D S ox M D V K K -

b

y

y<sup>2</sup>

y

y

y

y

y

y

y

b<sup>2</sup>



Raw File  
agg\_pep\_sort\_pos\_3

Scan  
17179

Method  
FTMS; HCD

Score  
62.77

m/z  
730.35

Gene names  
SCML2

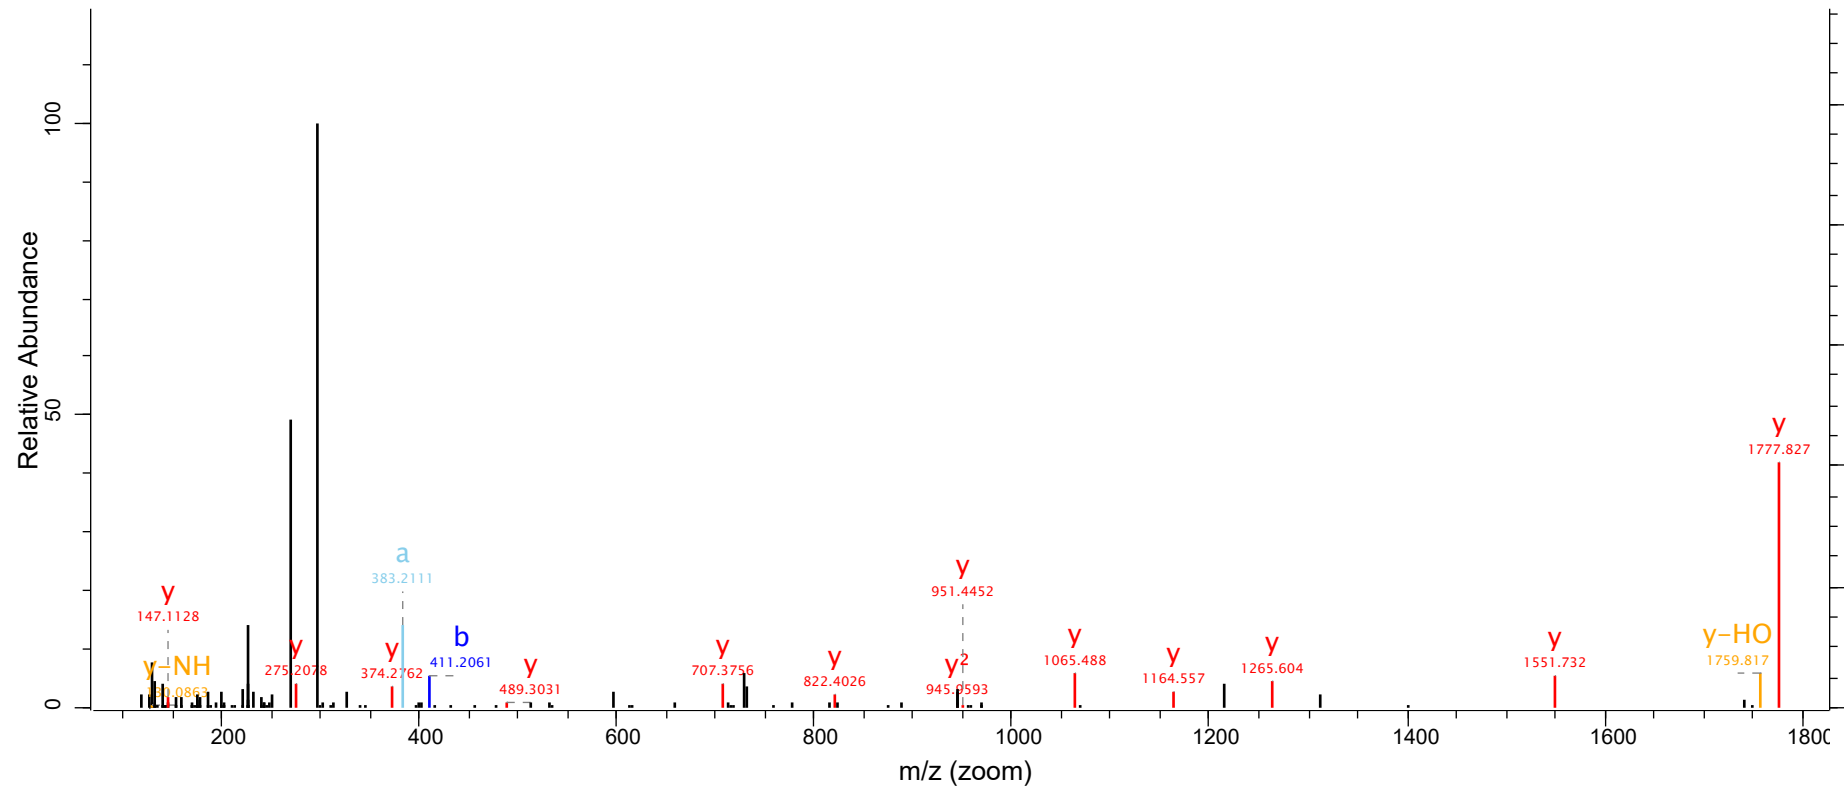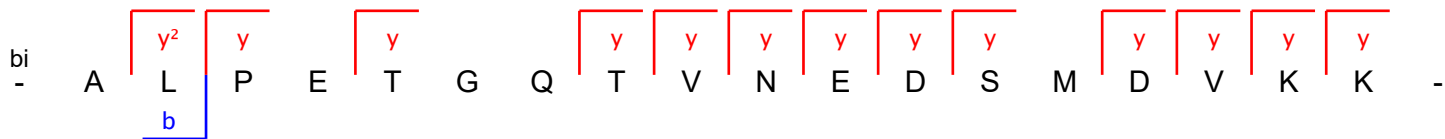

Raw File  
agg\_pep\_sort\_pos\_1

Scan  
19823

Method  
FTMS; HCD

Score  
57.33

m/z  
681.33

Gene names  
SDR9C7

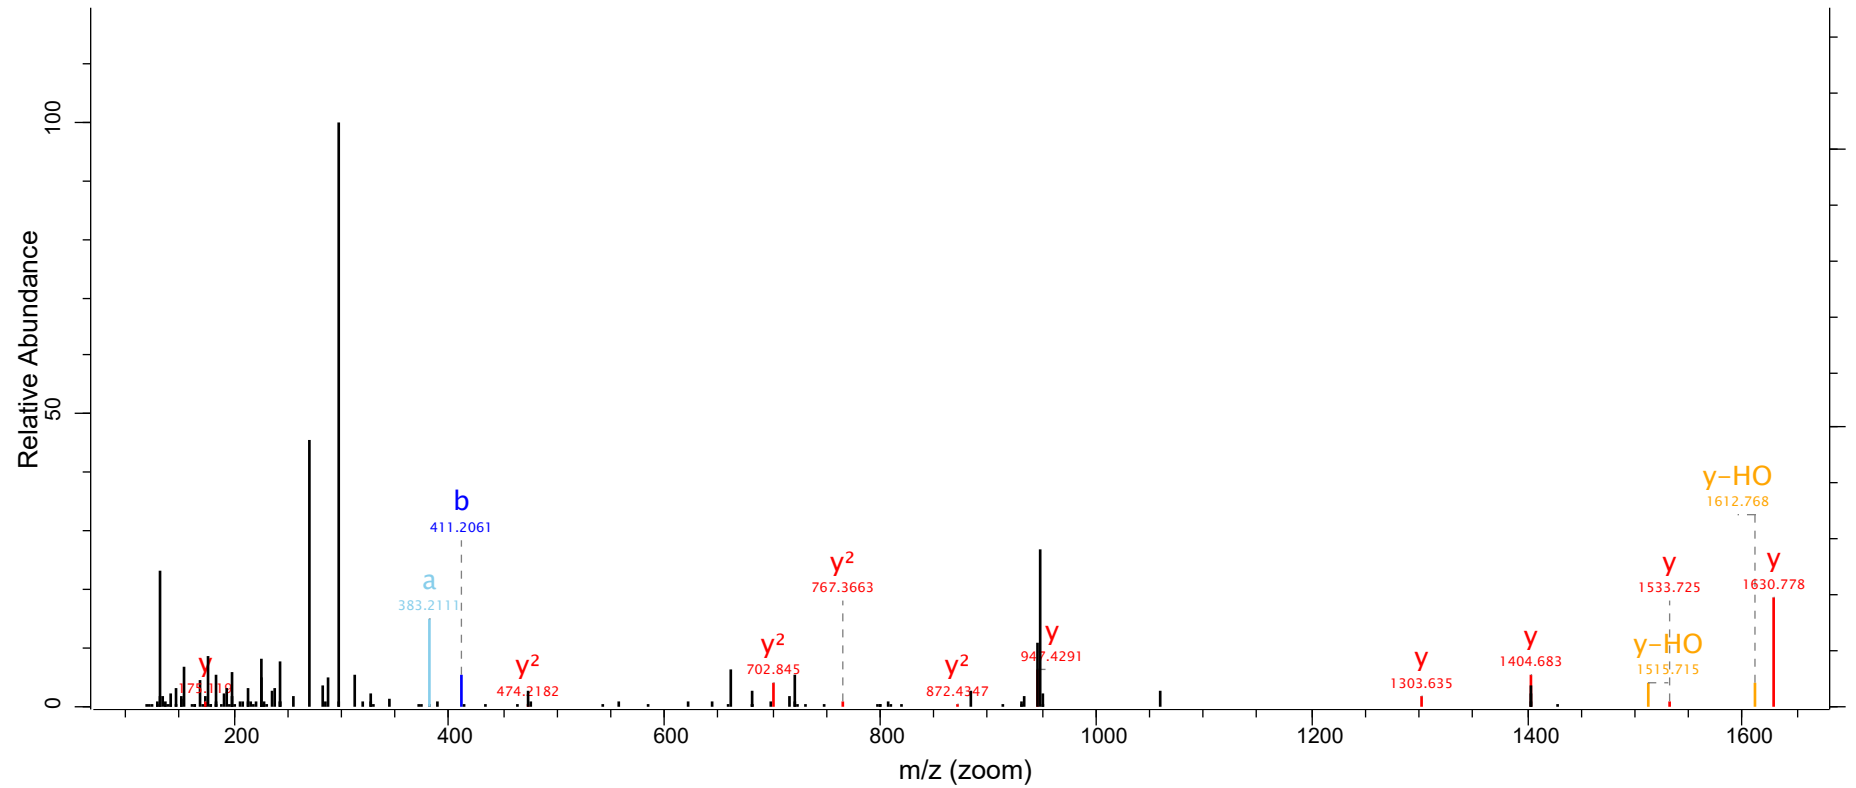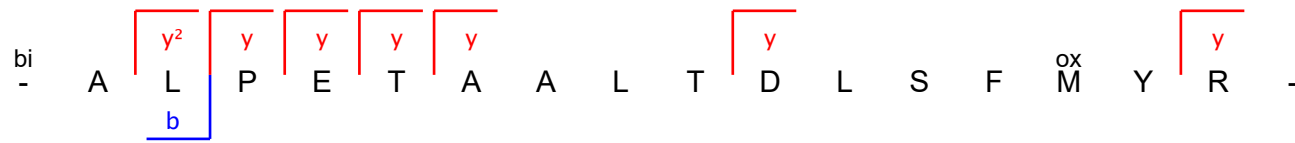

Raw File  
agg\_pep\_sort\_pos\_1

Scan  
22938

Method  
FTMS; HCD

Score  
66.62

m/z  
655.35

Gene names  
SEPT11

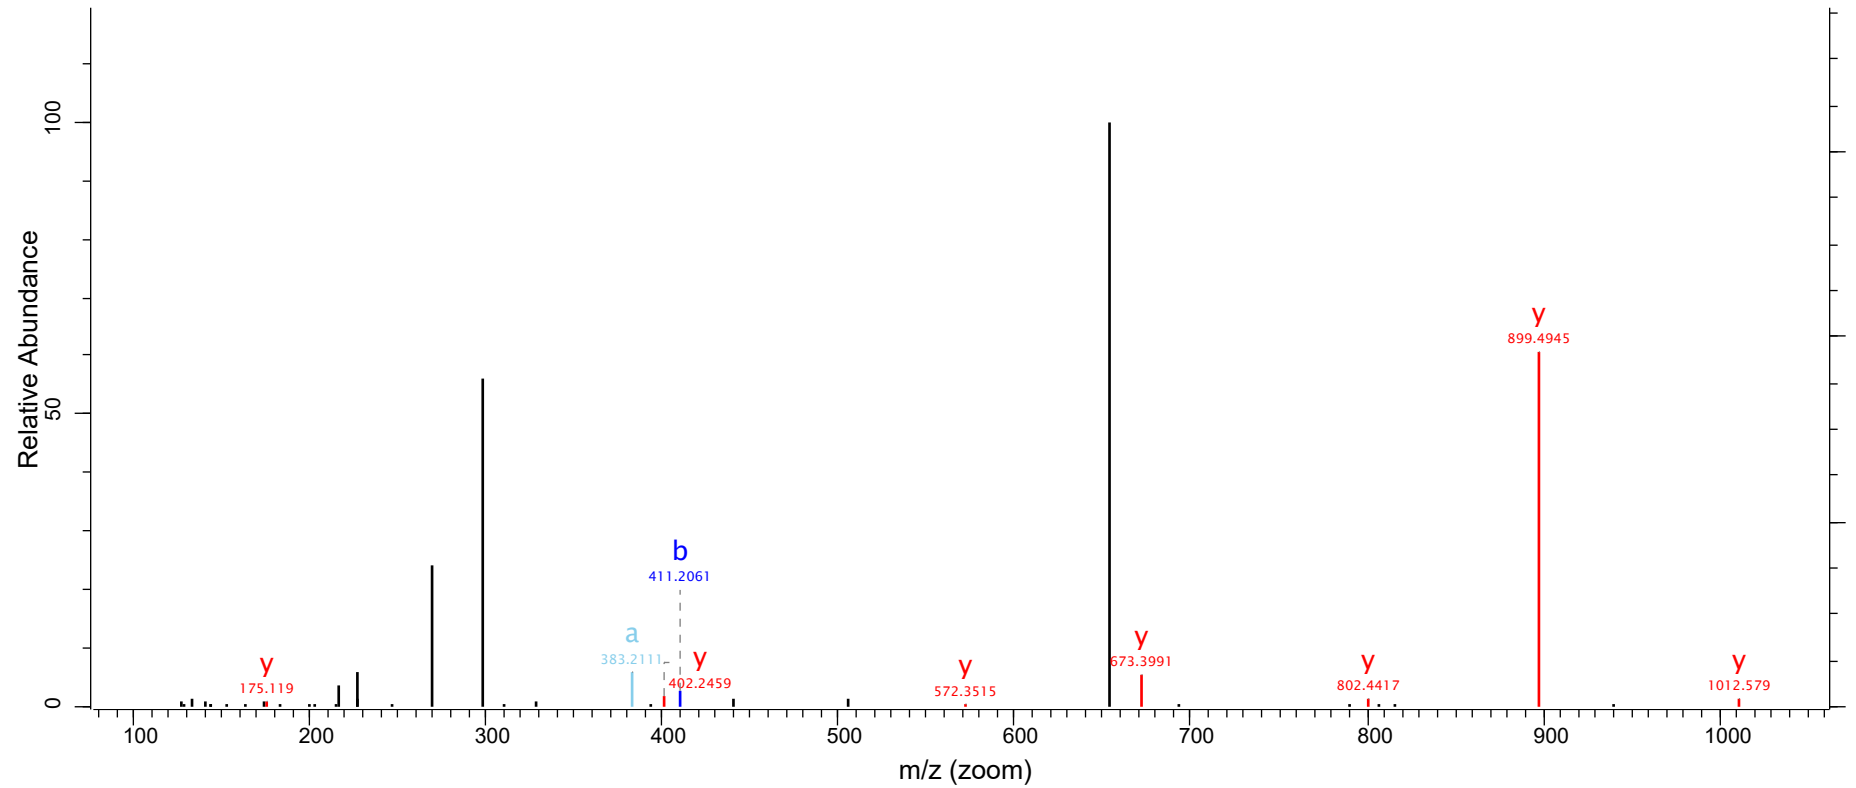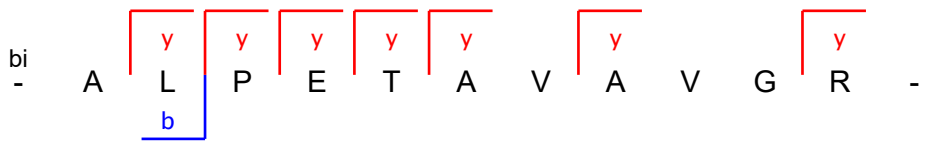

Raw File  
agg\_pep\_sort\_pos\_1

Scan  
15979

Method  
FTMS; HCD

Score  
94.3

m/z  
799.91

Gene names  
SH3KBP1

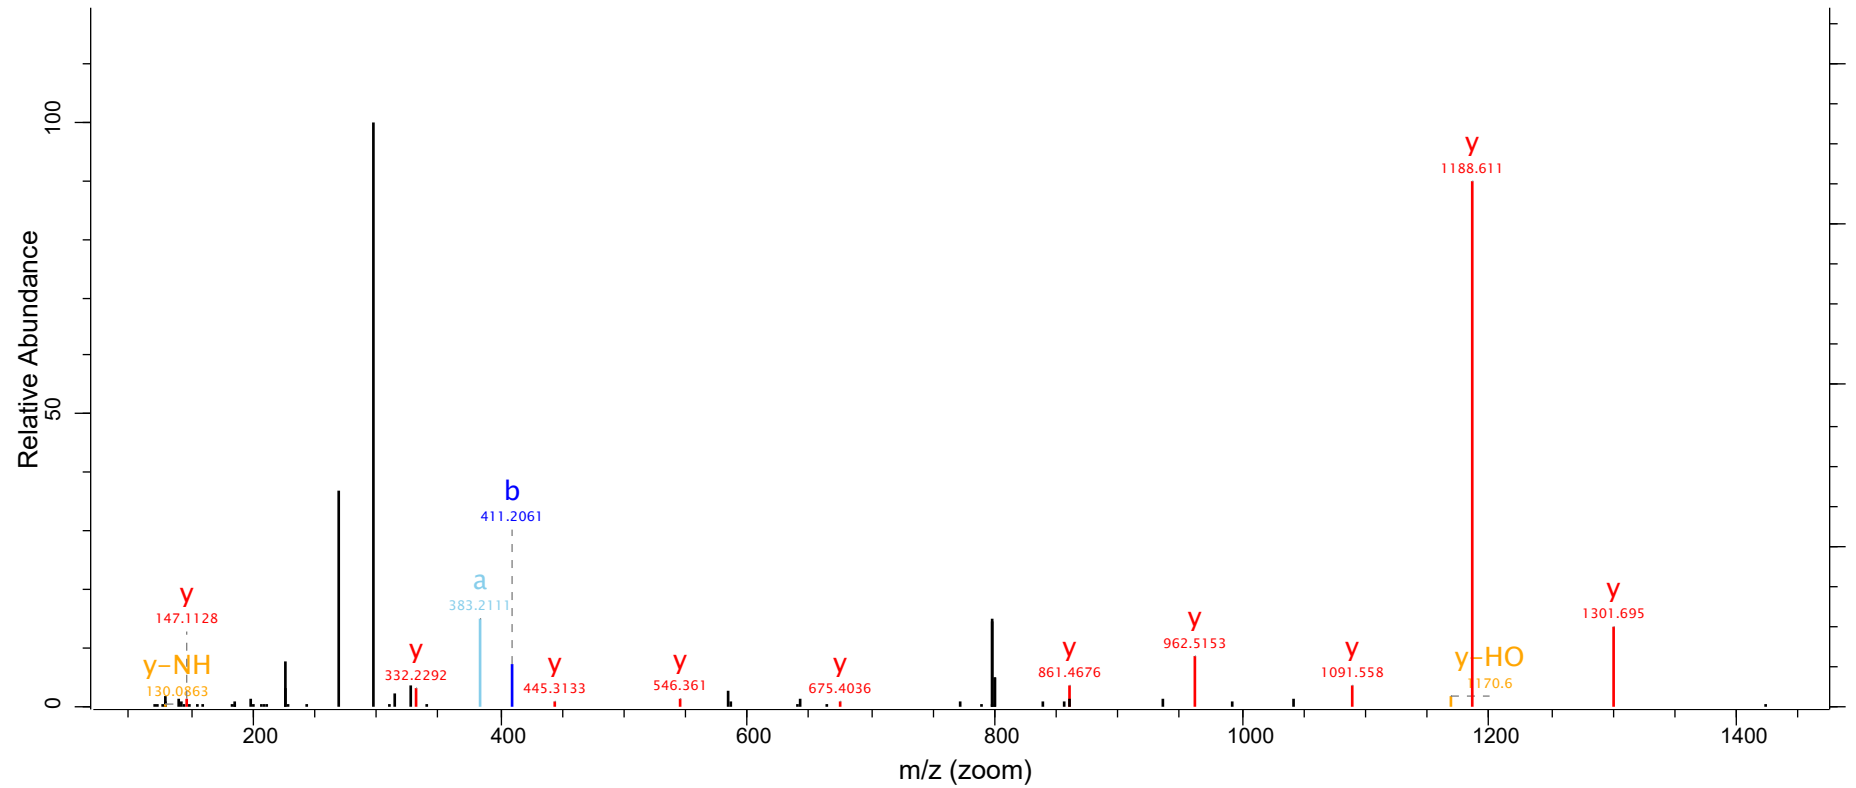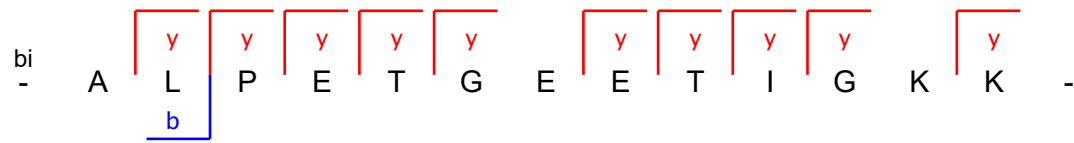

Raw File  
agg\_pep\_sort\_pos\_2

Scan  
21675

Method  
FTMS; HCD

Score  
80.52

m/z  
962.48

Gene names  
SLC16A3

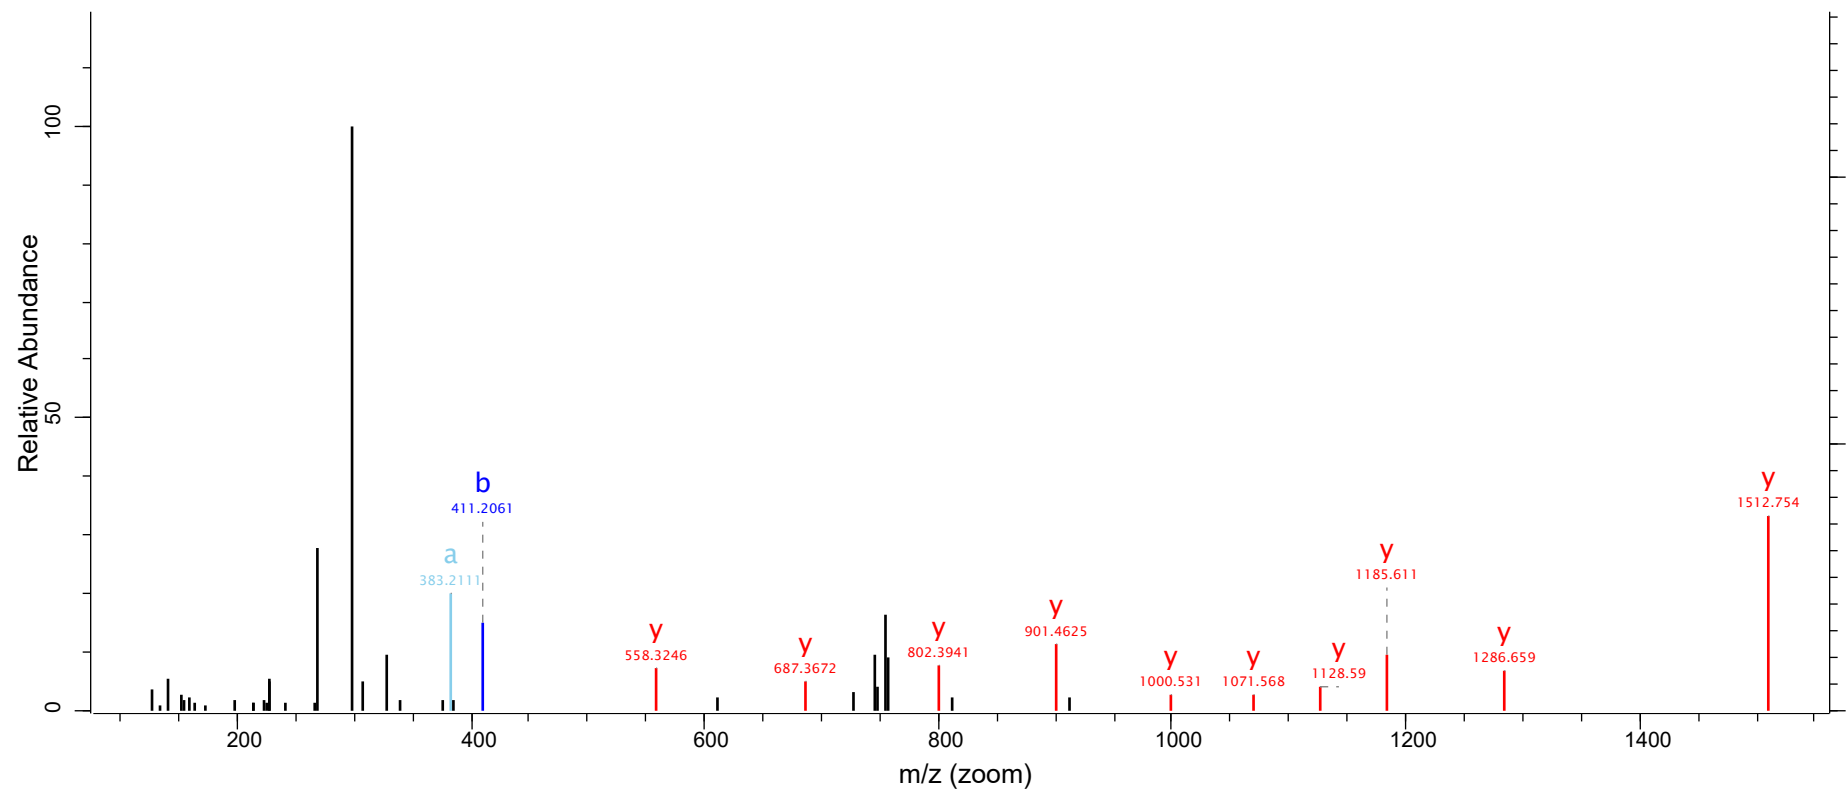

bi - A L P E T G G A V V D E G P T G V K -

Fragmentation diagram showing b and y ions. A blue bracket labeled 'b' spans from the start to the P residue. Red brackets labeled 'y' span from the P residue to the end of the peptide sequence.

Raw File  
agg\_pep\_sort\_pos\_3

Scan  
12803

Method  
FTMS; HCD

Score  
79.91

m/z  
633.34

Gene names  
SLC1A1

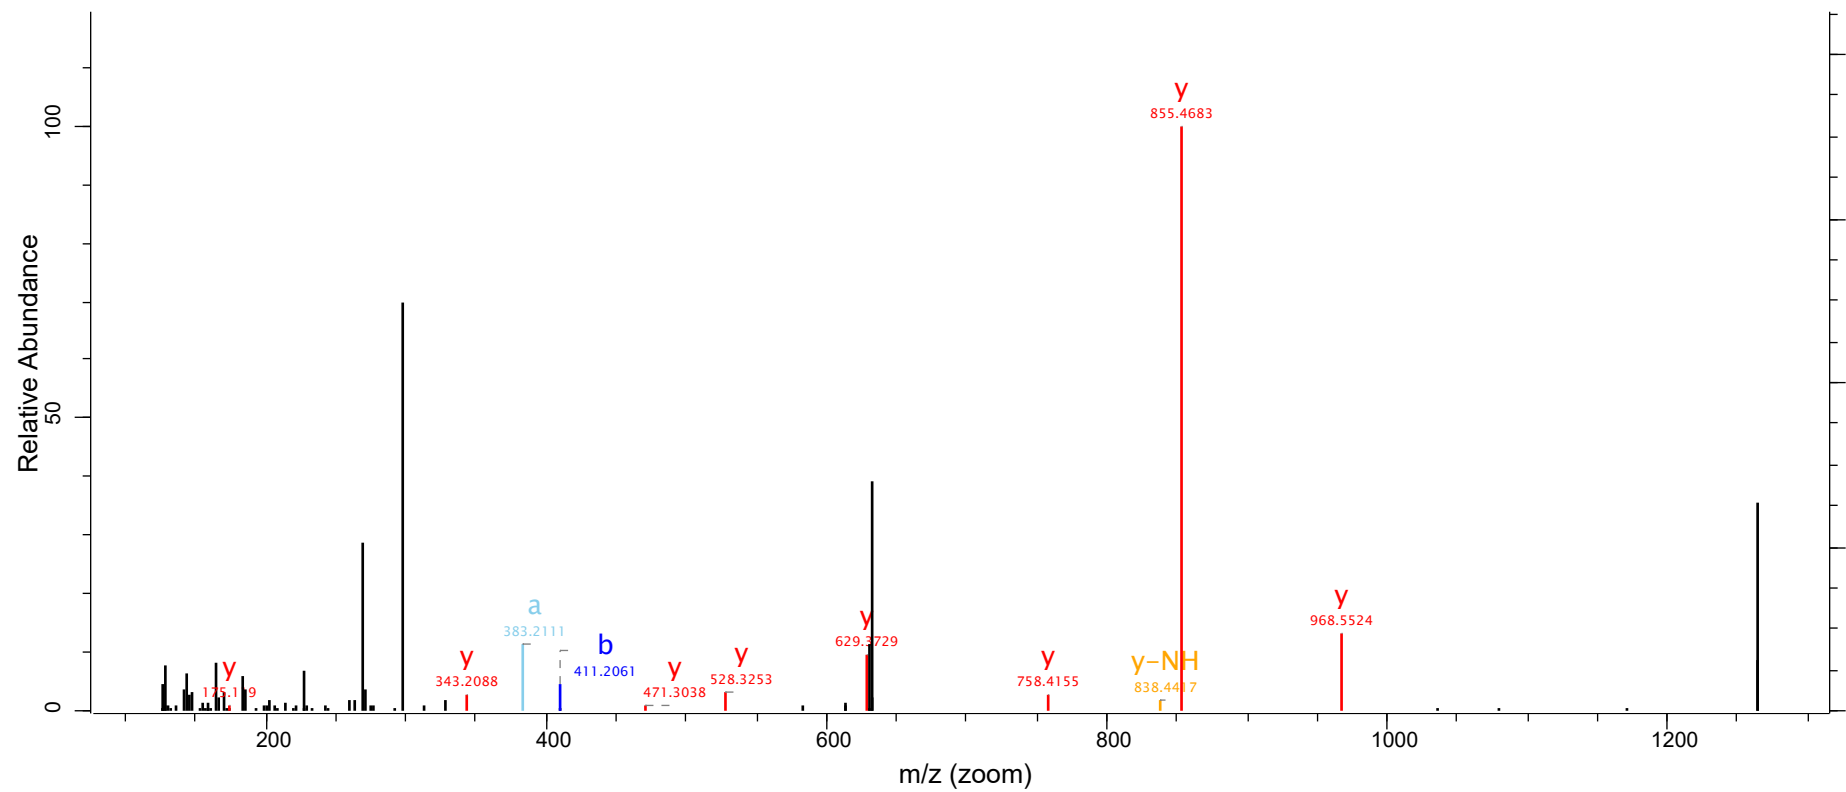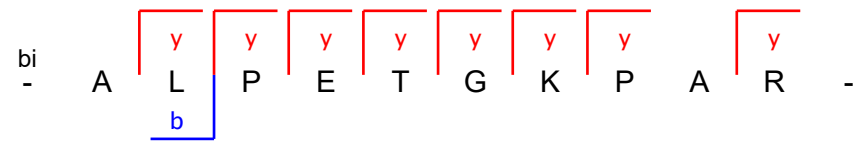

Raw File  
agg\_pep\_sort\_pos\_2

Scan  
13478

Method  
FTMS; HCD

Score  
53.68

m/z  
754.39

Gene names  
SLC33A1

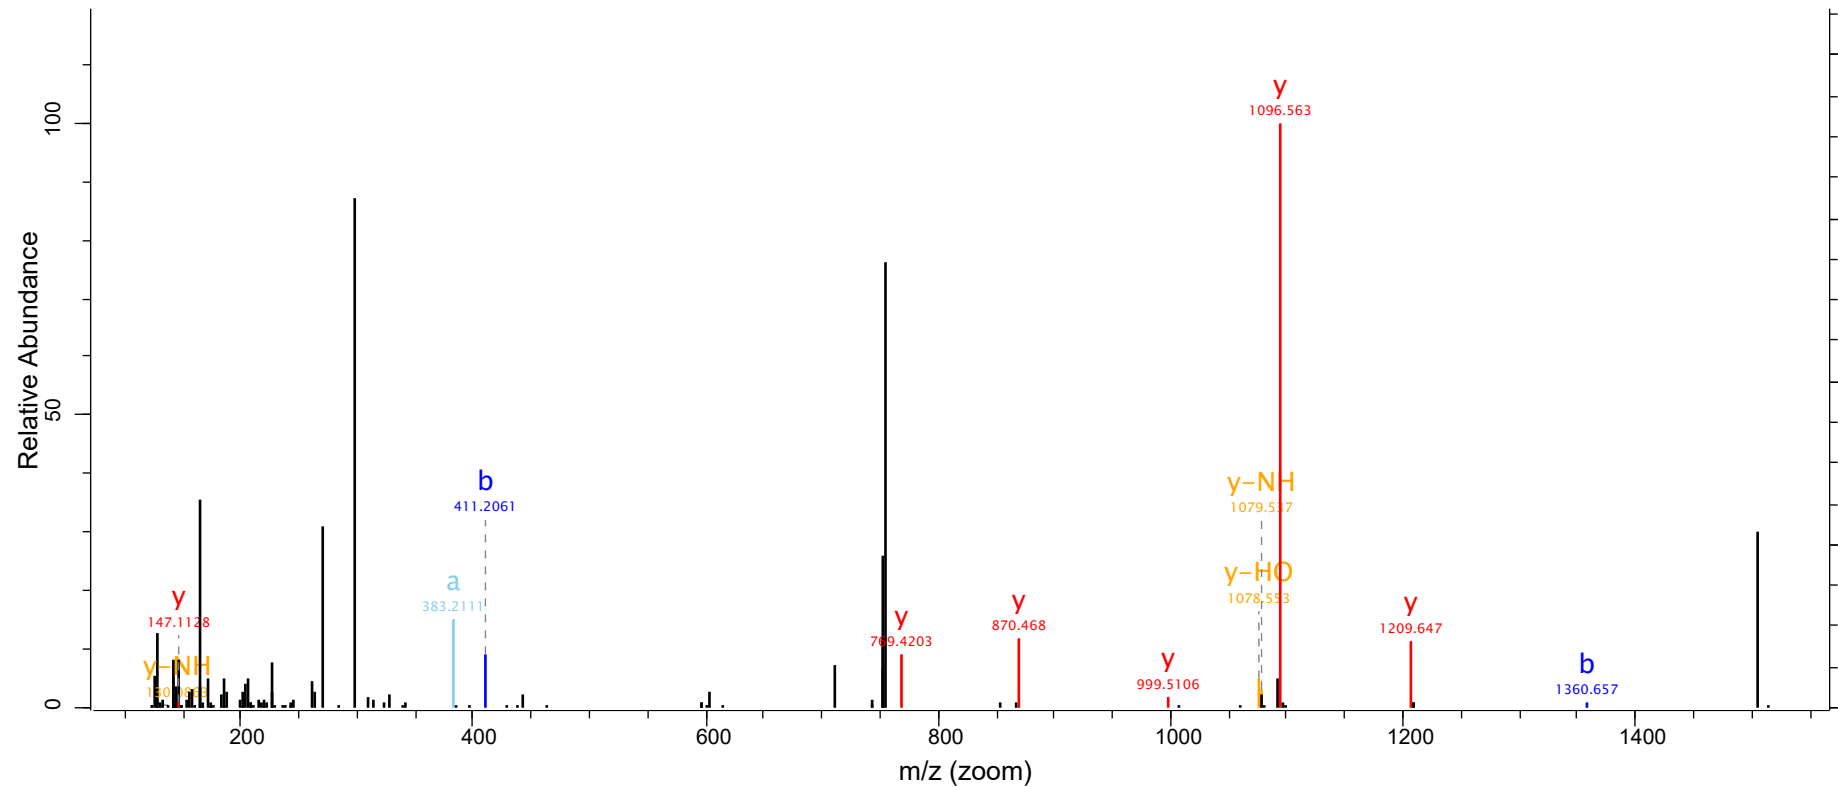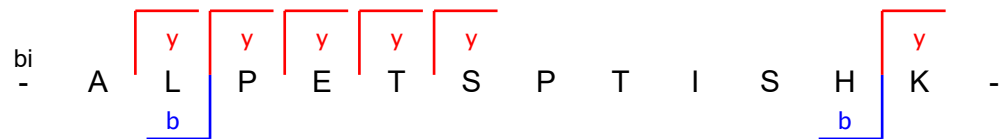

Raw File  
agg\_pep\_sort\_pos\_1

Scan  
11877

Method  
FTMS; HCD

Score  
58.83

m/z  
666.35

Gene names  
SLC35D1

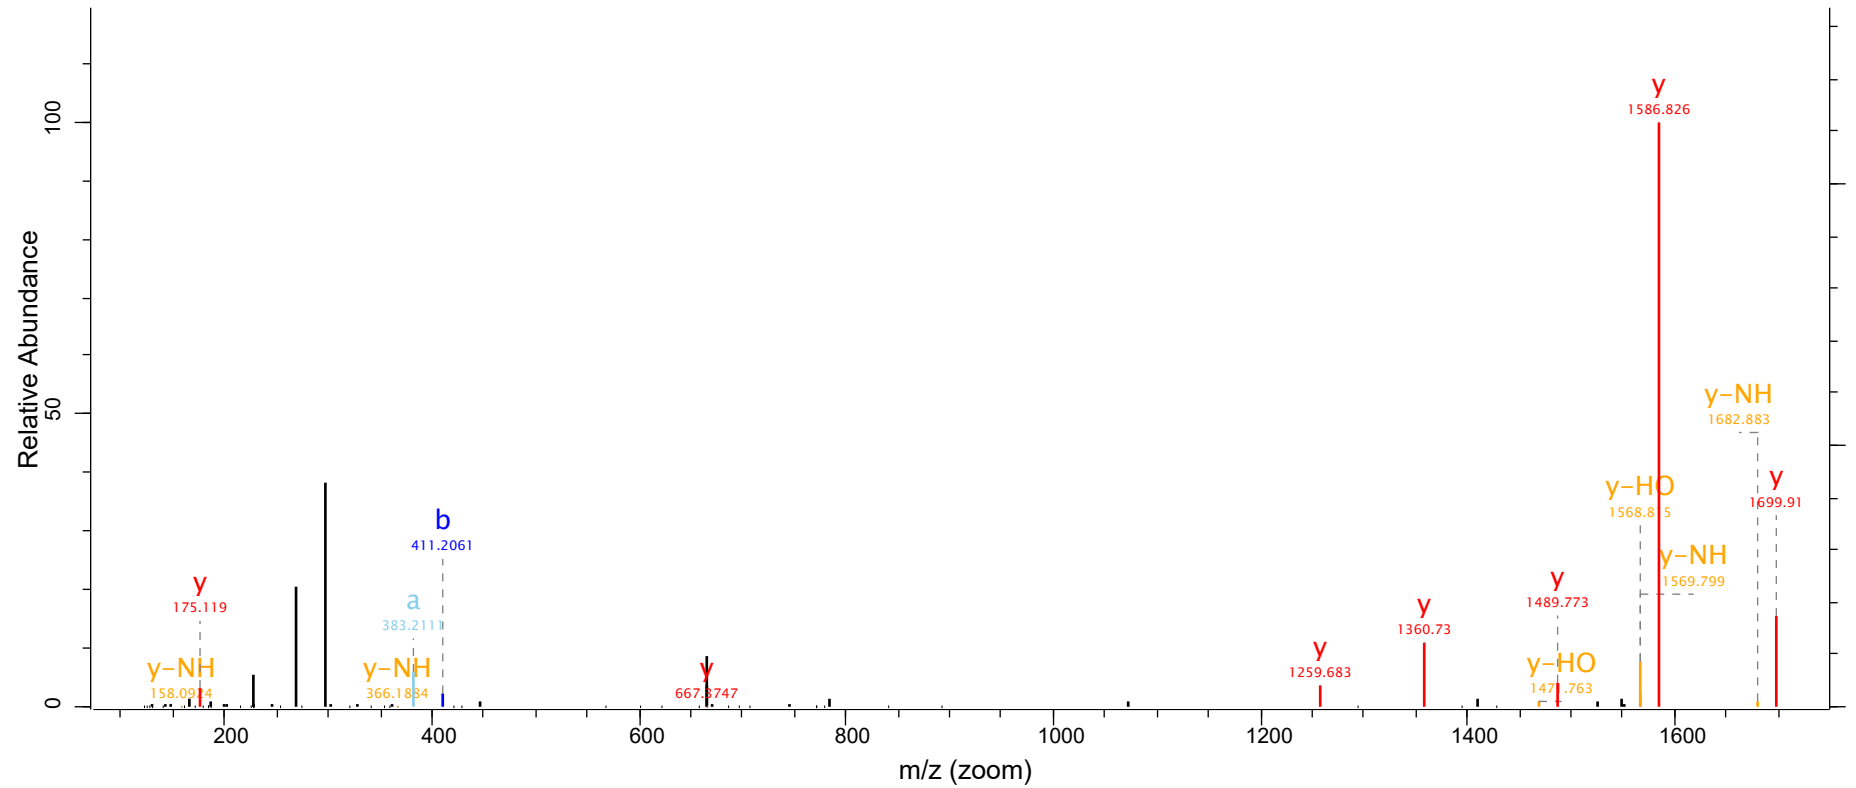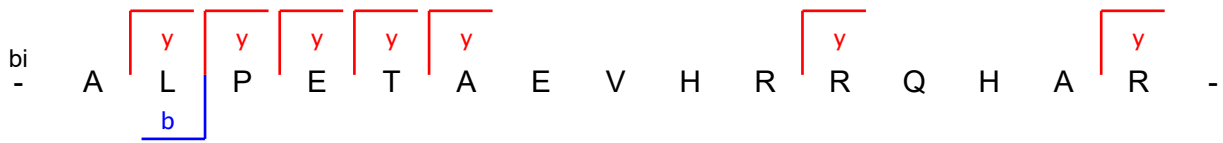





Raw File  
agg\_pep\_sort\_pos\_2

Scan  
16329

Method  
FTMS; HCD

Score  
44.57

m/z  
795.08

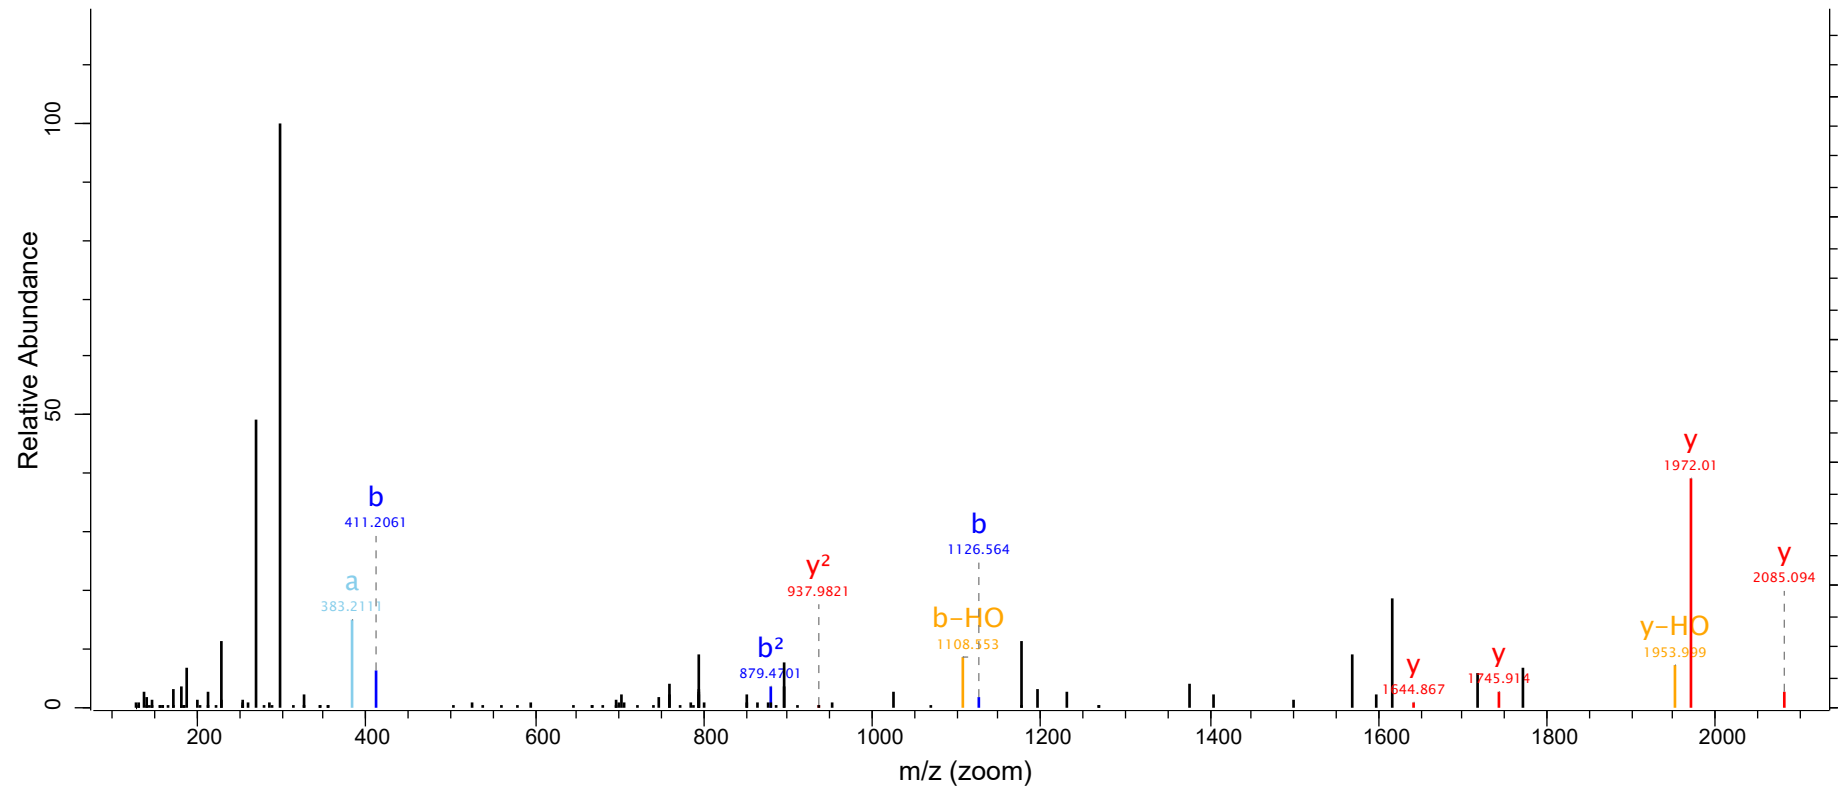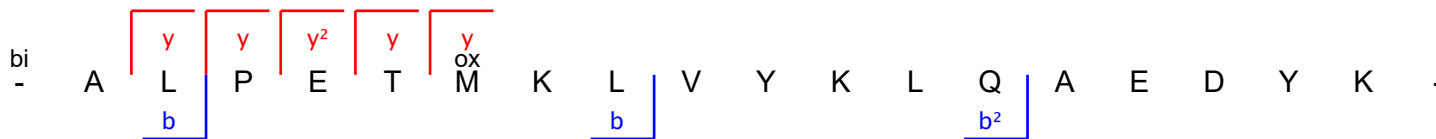

Raw File  
agg\_pep\_sort\_pos\_1

Scan  
17536

Method  
FTMS; HCD

Score  
147.95

m/z  
749.87

Gene names  
SPANXB1

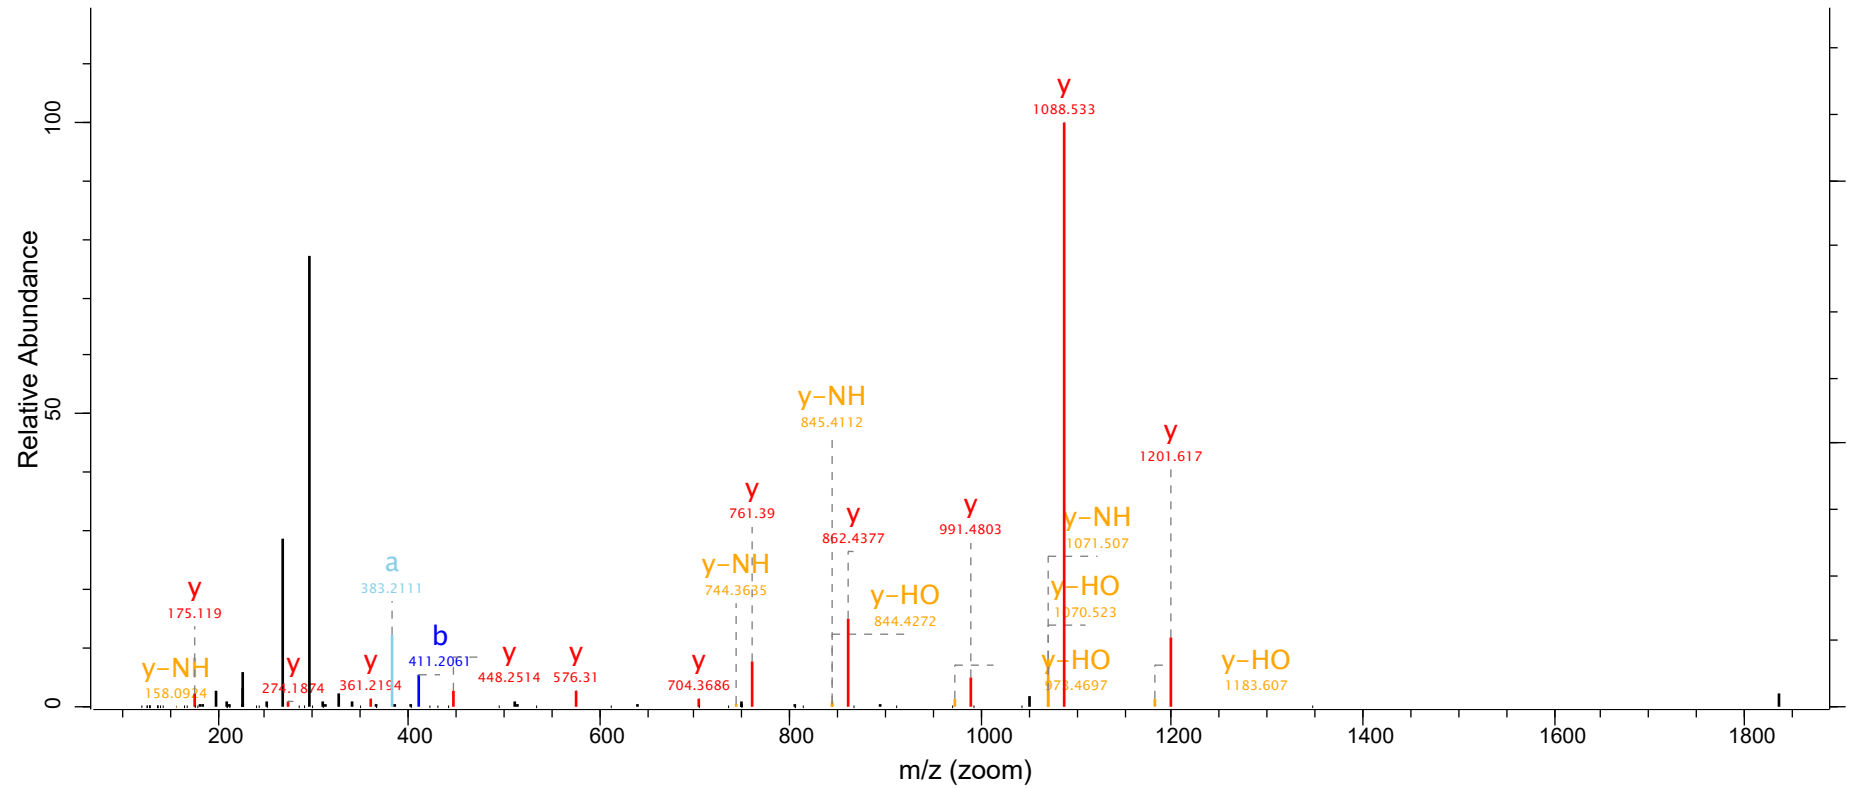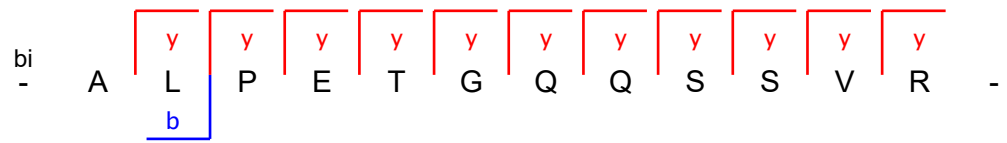

Raw File  
agg\_pep\_sort\_pos\_3

Scan  
13392

Method  
FTMS; HCD

Score  
66.38

m/z  
724.1

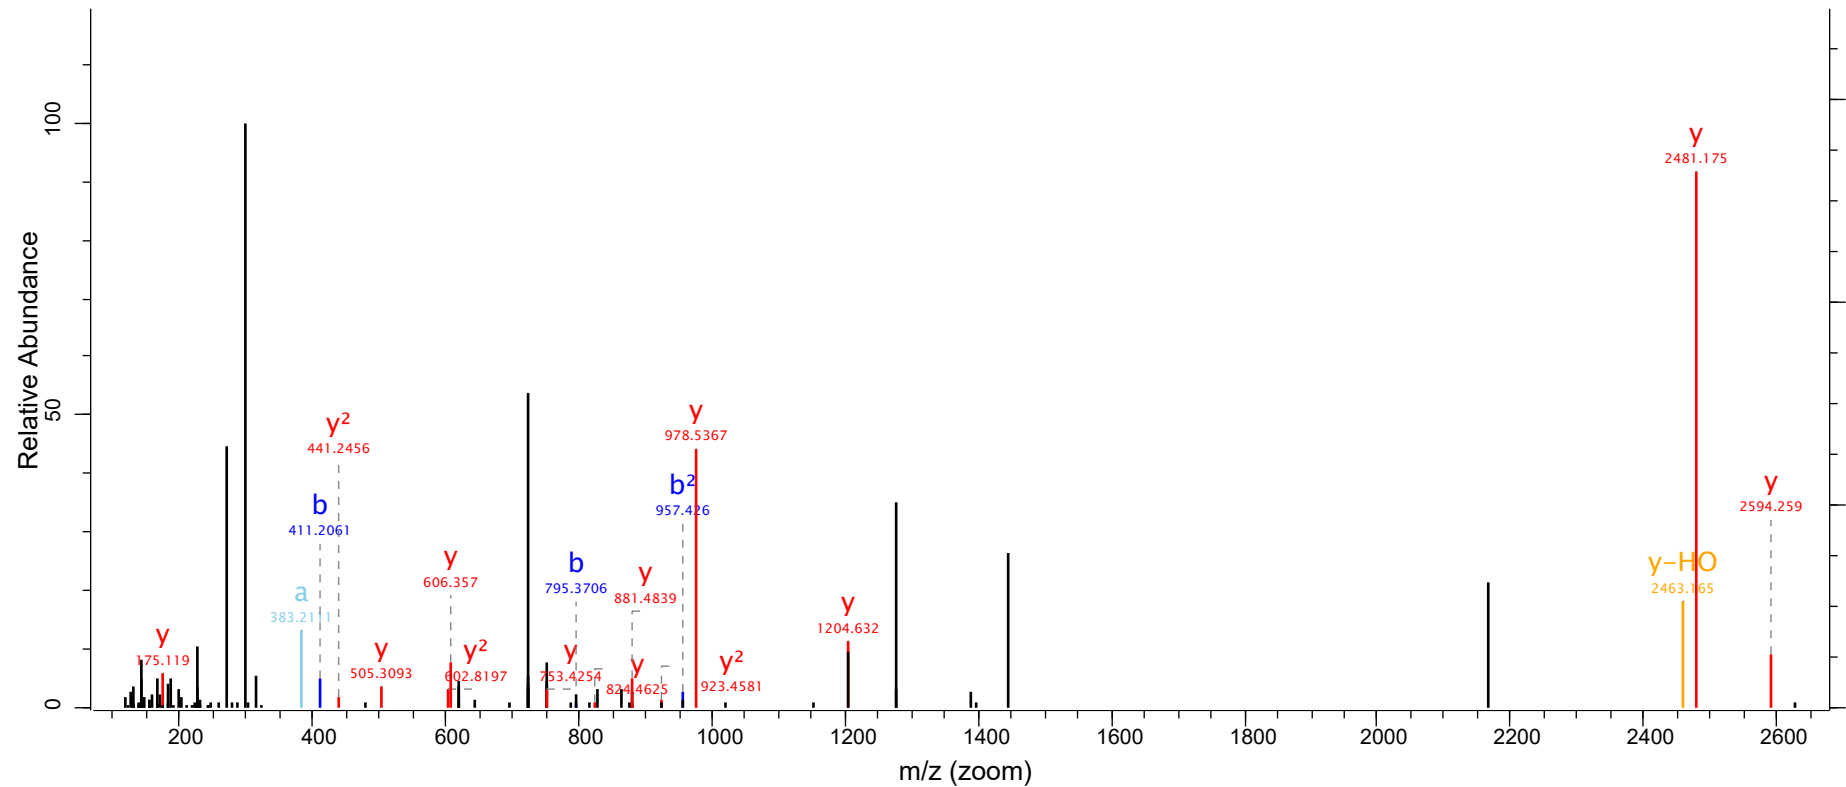

Raw File  
agg\_pep\_sort\_pos\_3

Scan  
15899

Method  
FTMS; HCD

Score  
122.18

m/z  
571.78

Gene names  
SRC

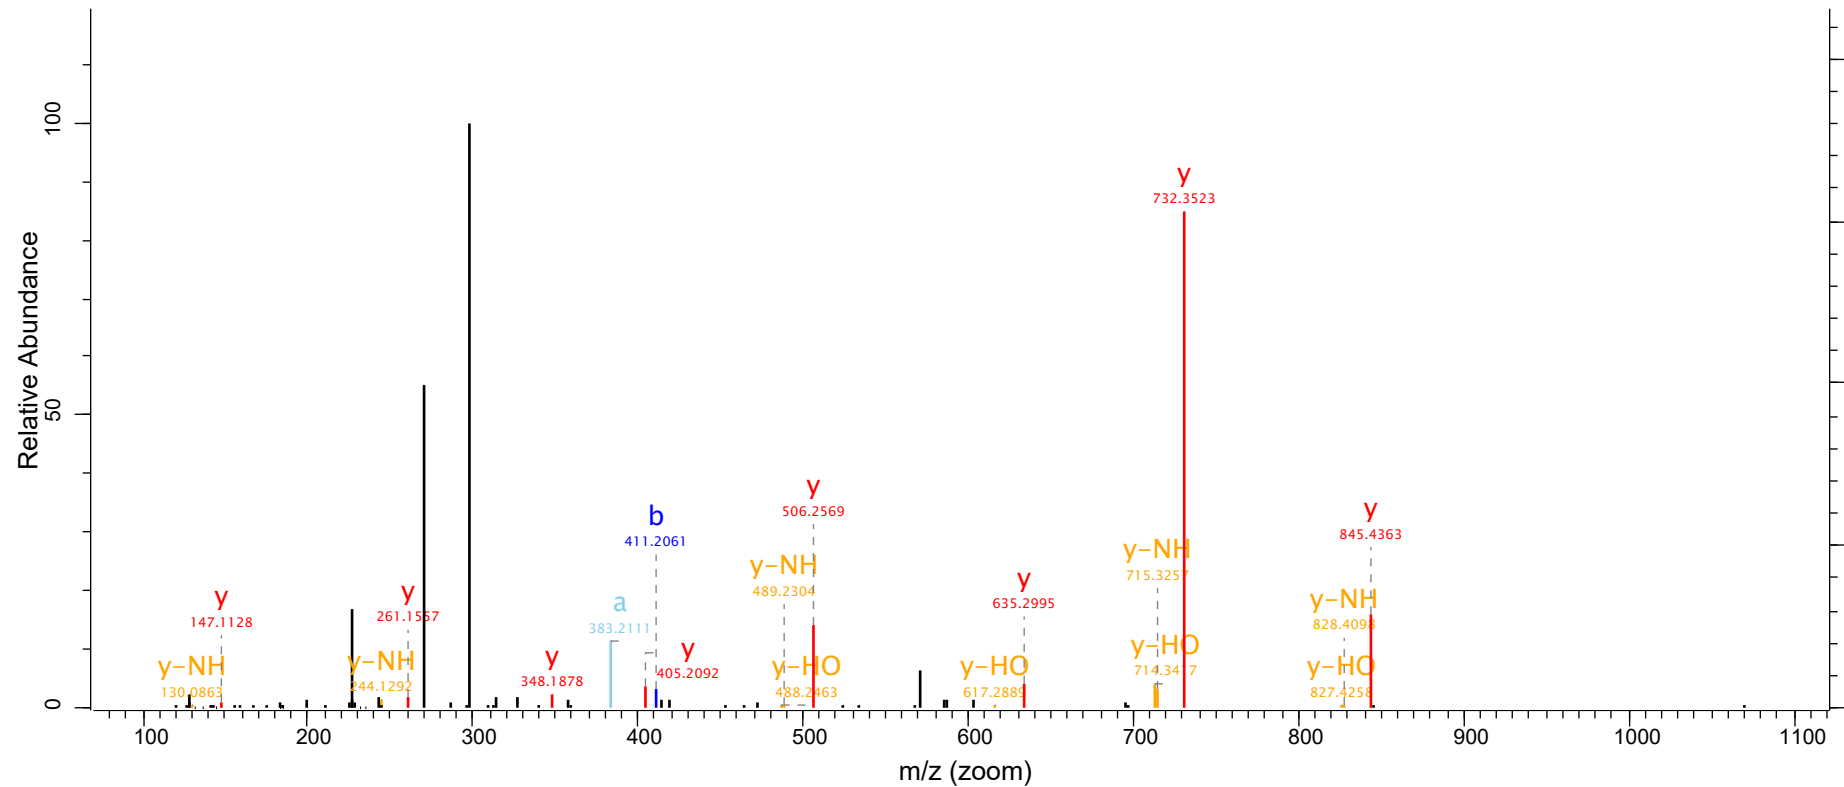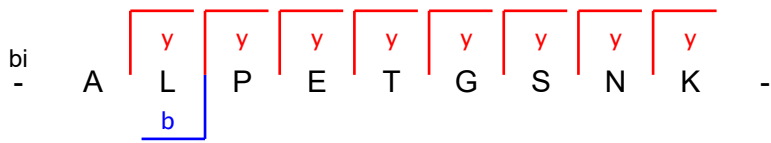

Raw File  
agg\_pep\_sort\_pos\_1

Scan  
19096

Method  
FTMS; HCD

Score  
54.6

m/z  
704.36

Gene names  
STX2

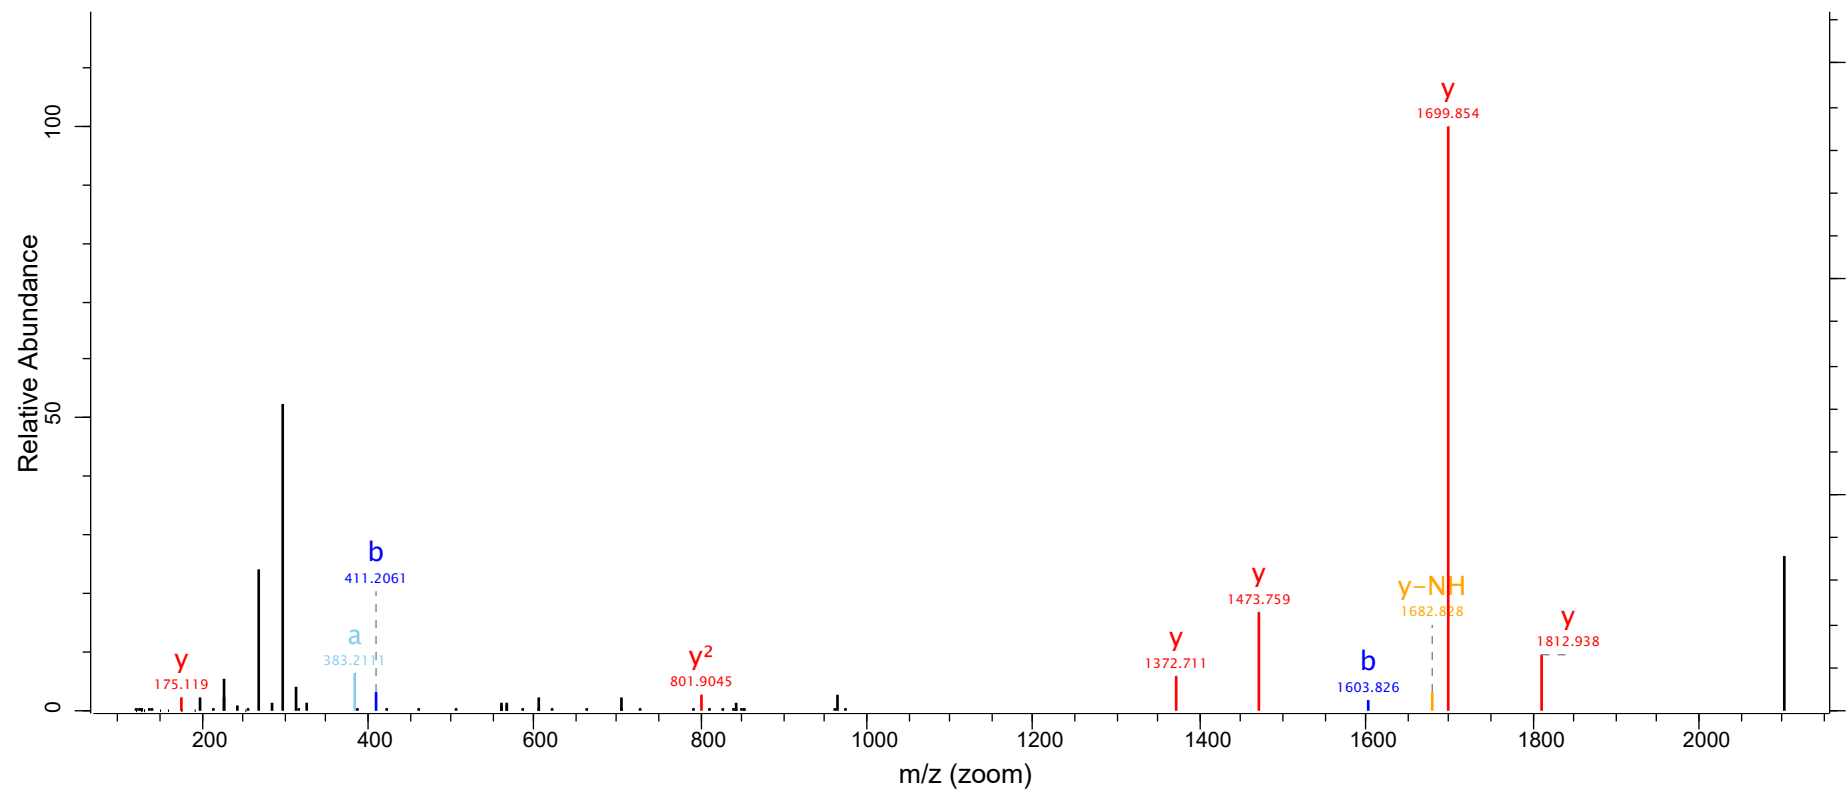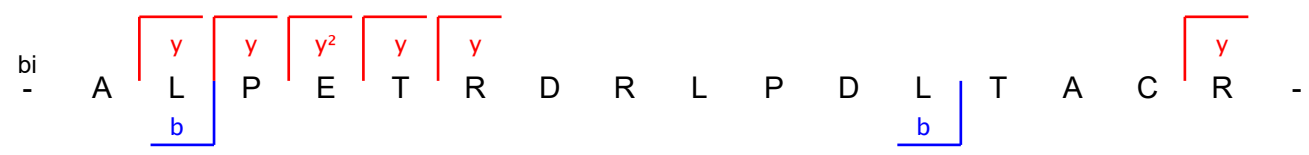

Raw File  
agg\_pep\_sort\_pos\_1

Scan  
12659

Method  
FTMS; HCD

Score  
72.29

m/z  
832.4

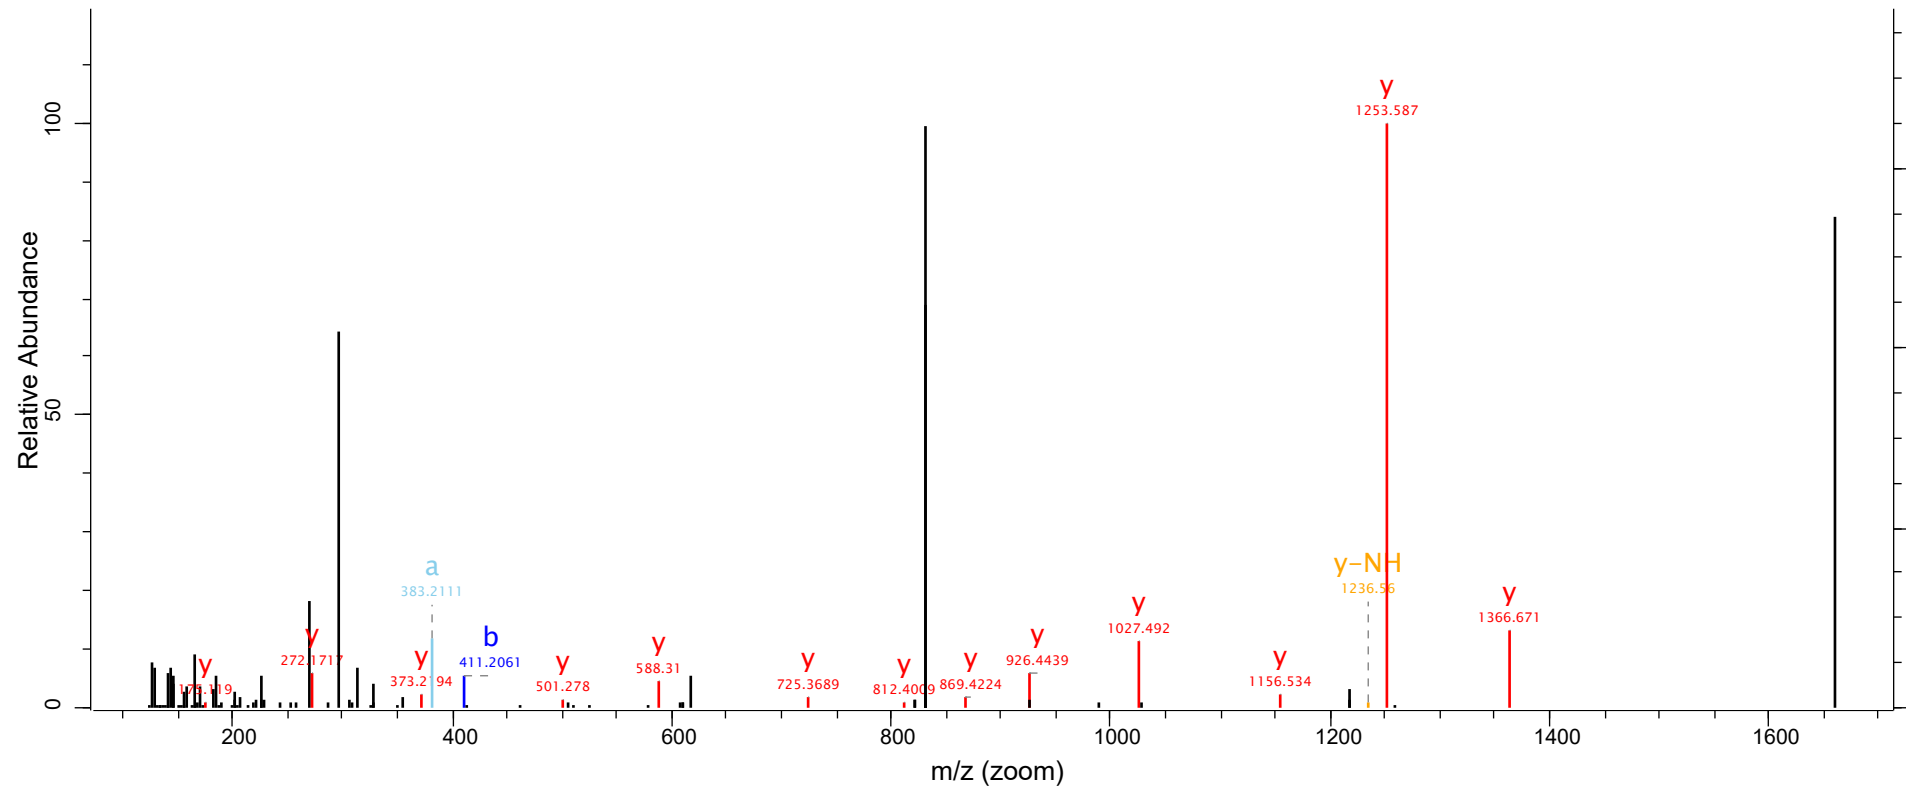

bi

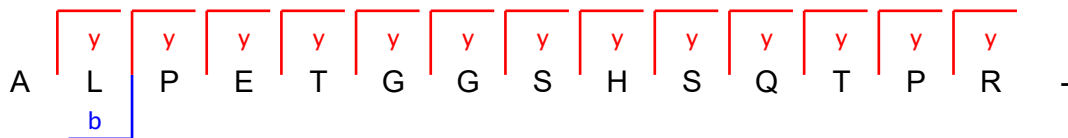

Raw File  
agg\_pep\_sort\_pos\_1

Scan  
9567

Method  
FTMS; HCD

Score  
38.38

m/z  
700

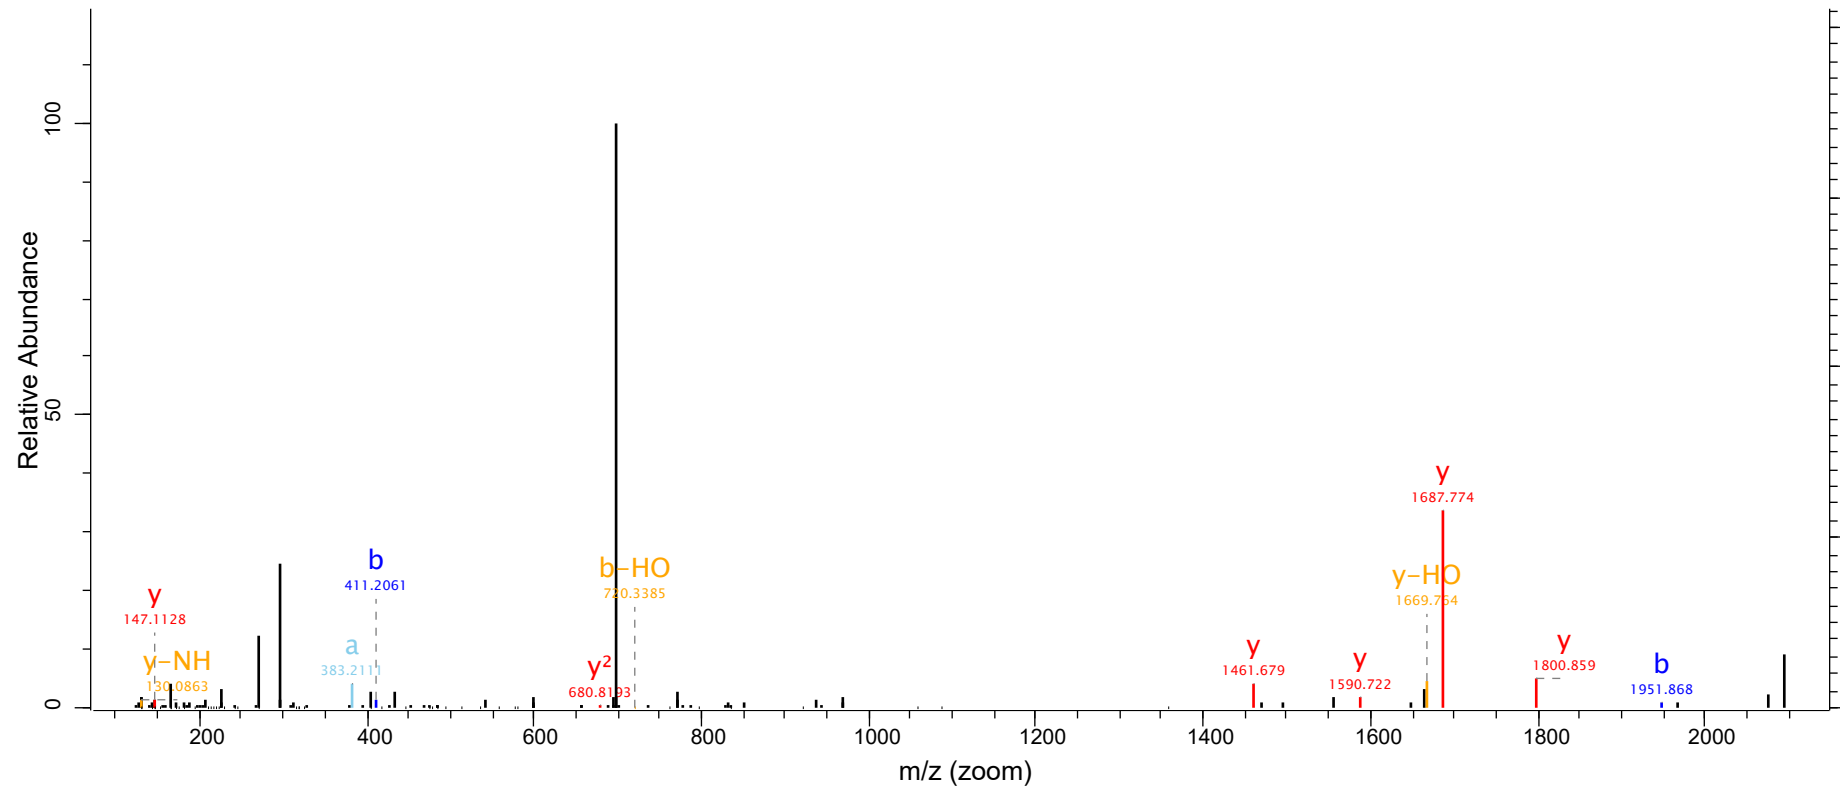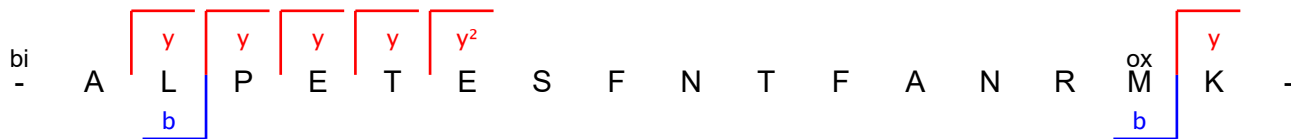



Raw File  
agg\_pep\_sort\_pos\_3

Scan  
21147

Method  
FTMS; HCD

Score  
196.33

m/z  
1105.04

Gene names  
TES

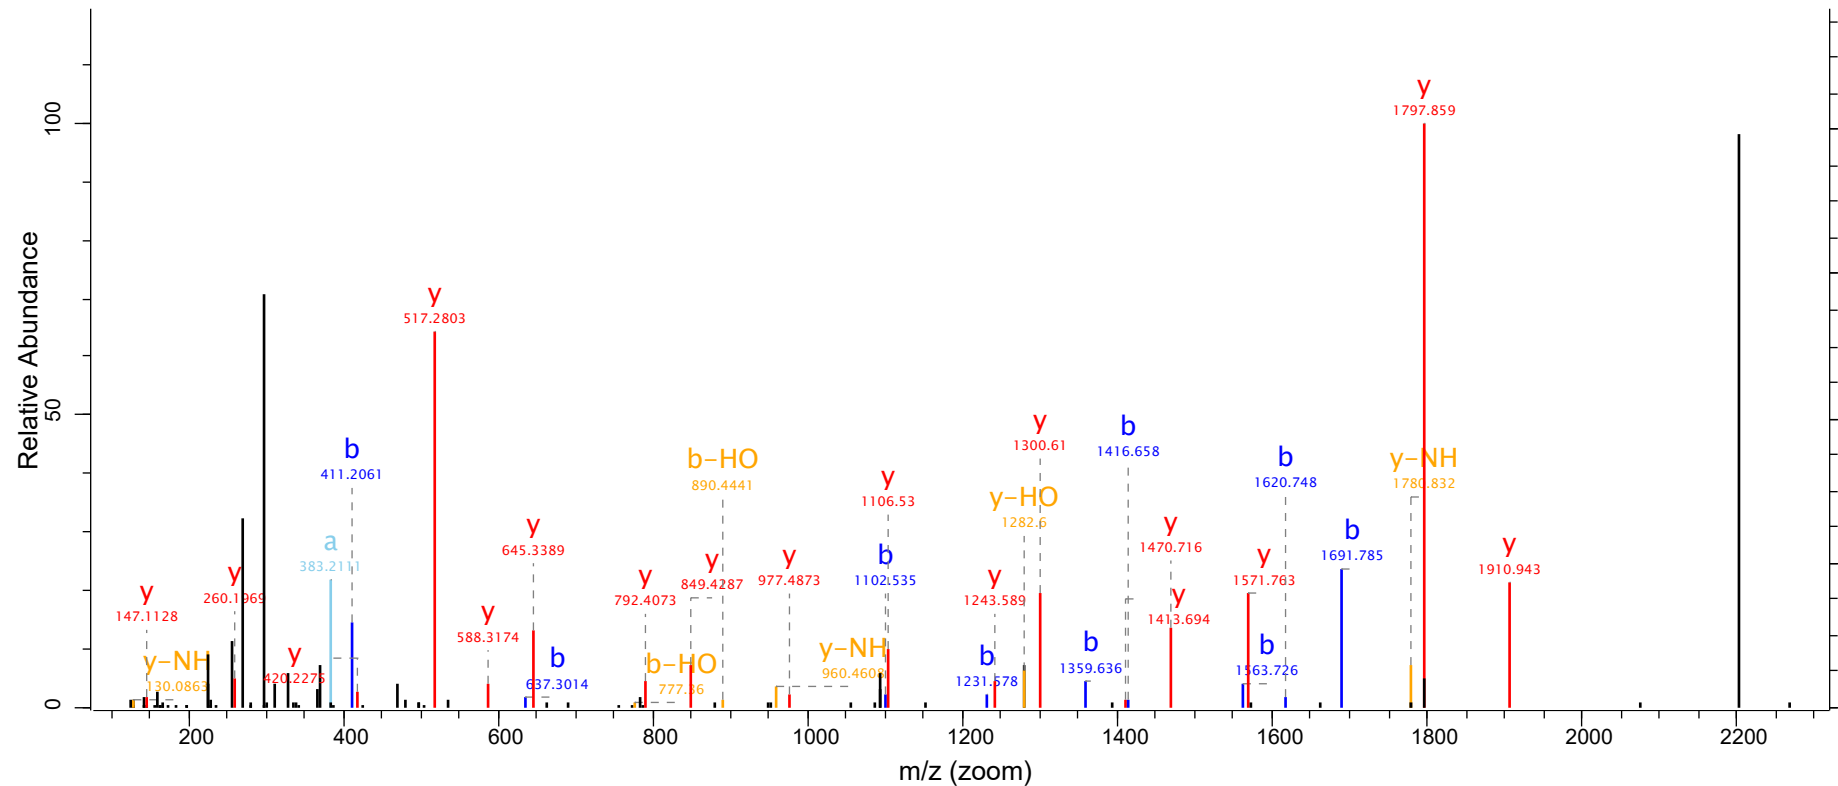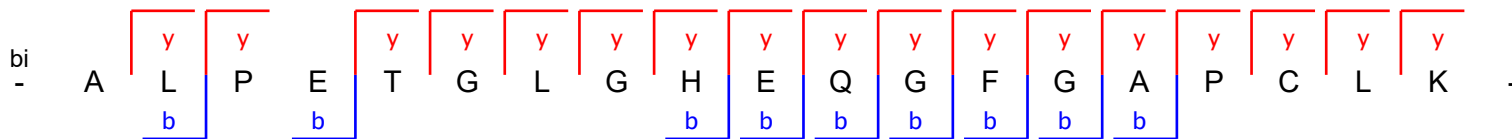

Raw File  
agg\_pep\_sort\_pos\_2

Scan  
17865

Method  
FTMS; HCD

Score  
105.14

m/z  
584.3

Gene names  
TEX101;SEZ6L2

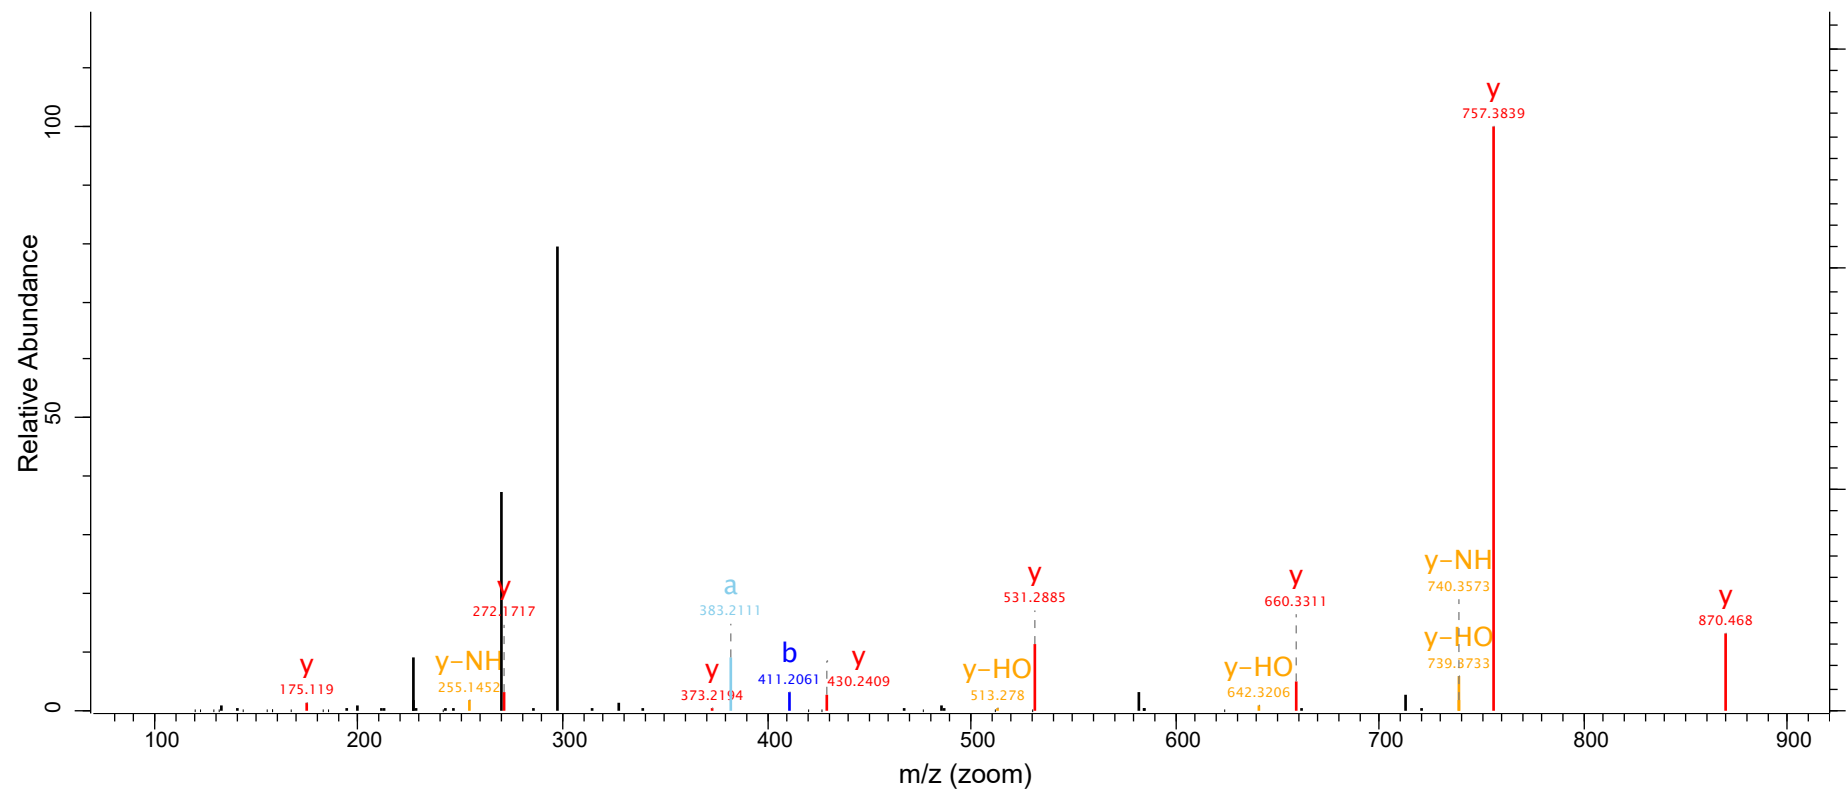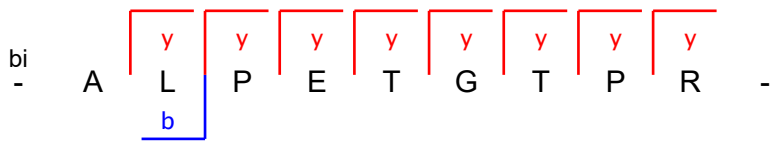

Raw File  
agg\_pep\_sort\_pos\_1

Scan  
17360

Method  
FTMS; HCD

Score  
62.19

m/z  
867.06

Gene names  
TIAM1

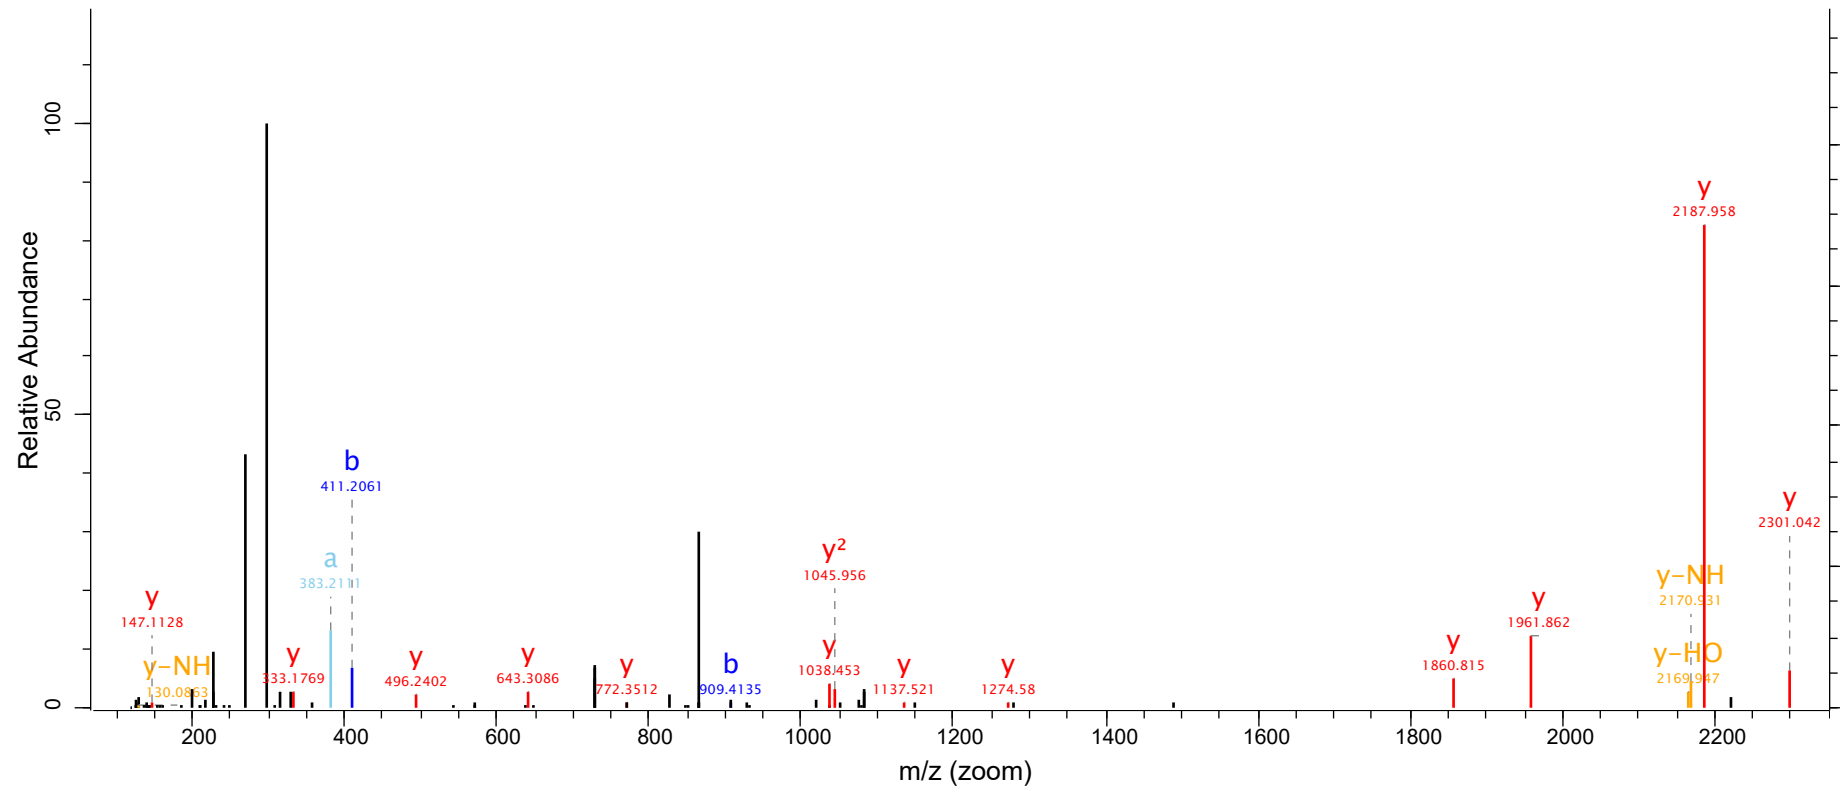

bi

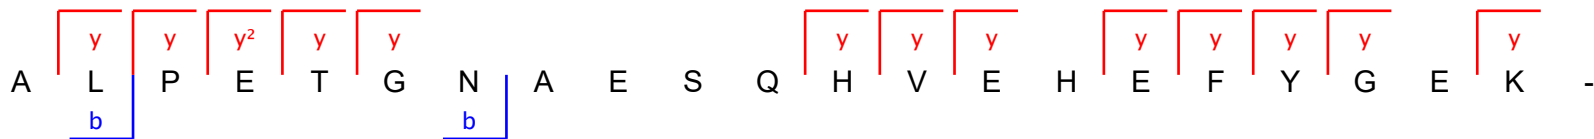

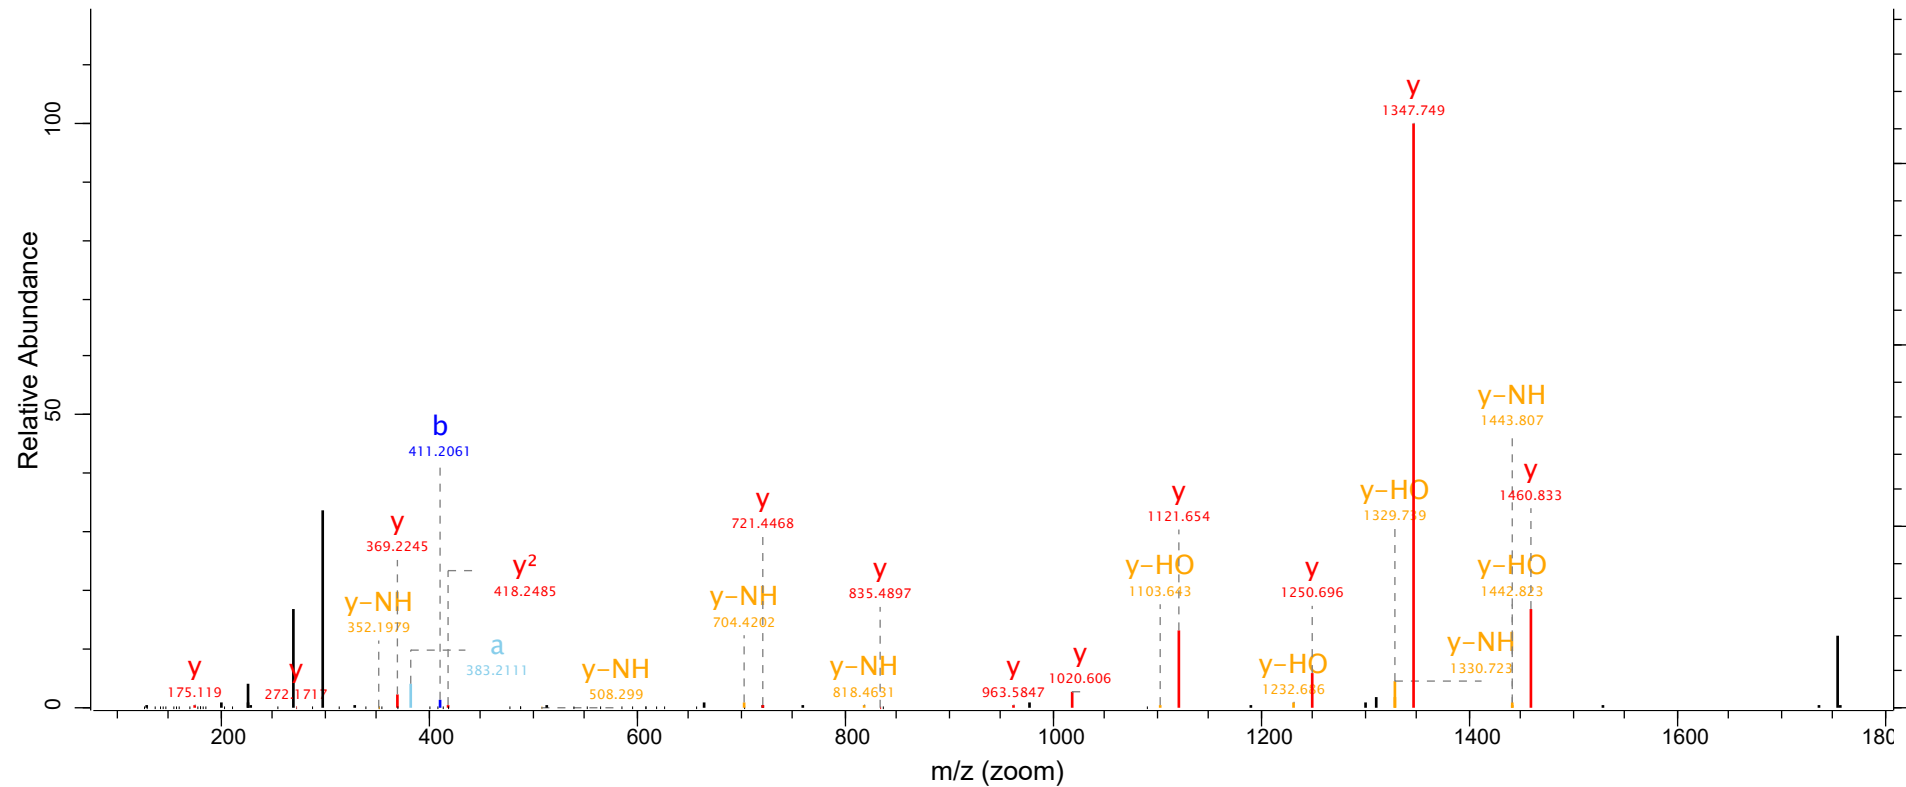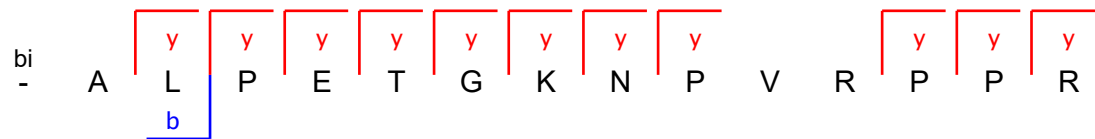

Raw File  
agg\_pep\_sort\_pos\_3

Scan  
18153

Method  
FTMS; HCD

Score  
53.4

m/z  
723.36

Gene names  
TMPRSS11A

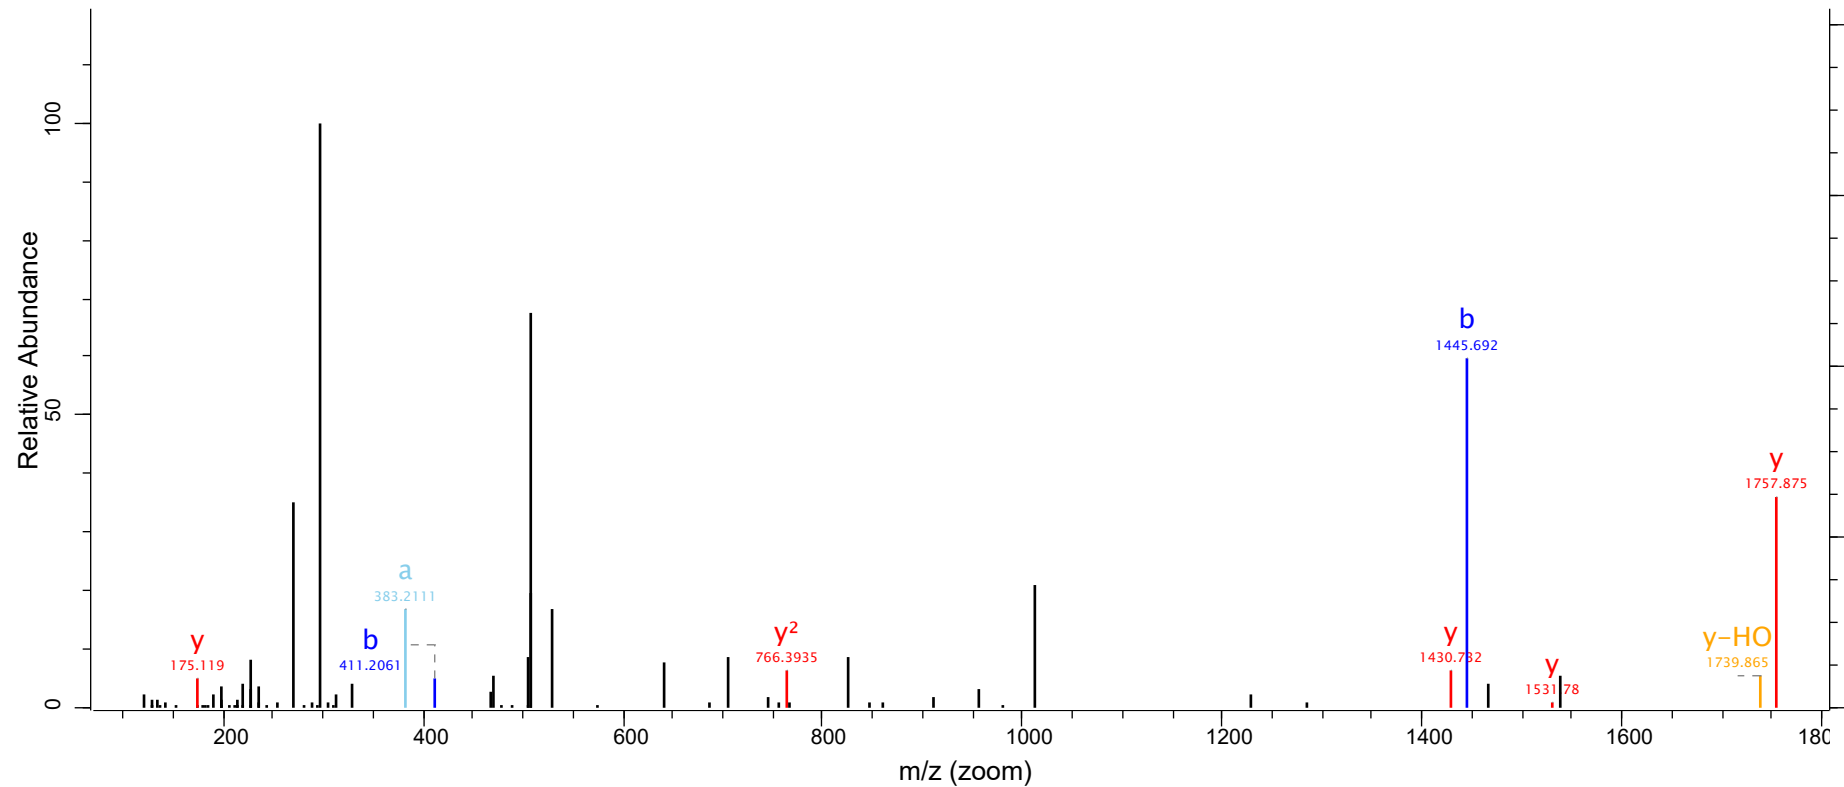

bi - A L P E T M Y R T V G F G T R S R -

Fragmentation diagram showing the sequence of amino acids: A L P E T M Y R T V G F G T R S R -. Red brackets indicate y-series fragments (L-P, E-T, T-M, S-R). Blue brackets indicate b-series fragments (L, V-G). The y-series fragments are labeled 'y' and the b-series fragments are labeled 'b'.

Raw File  
agg\_pep\_sort\_pos\_3

Scan  
16575

Method  
FTMS; HCD

Score  
65.56

m/z  
590.31

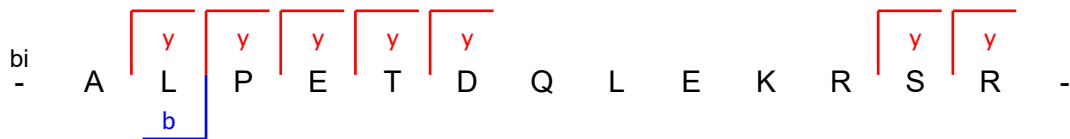

Raw File  
agg\_pep\_sort\_pos\_3

Scan  
16908

Method  
FTMS; HCD

Score  
57.96

m/z  
641.36

Gene names  
TPST1

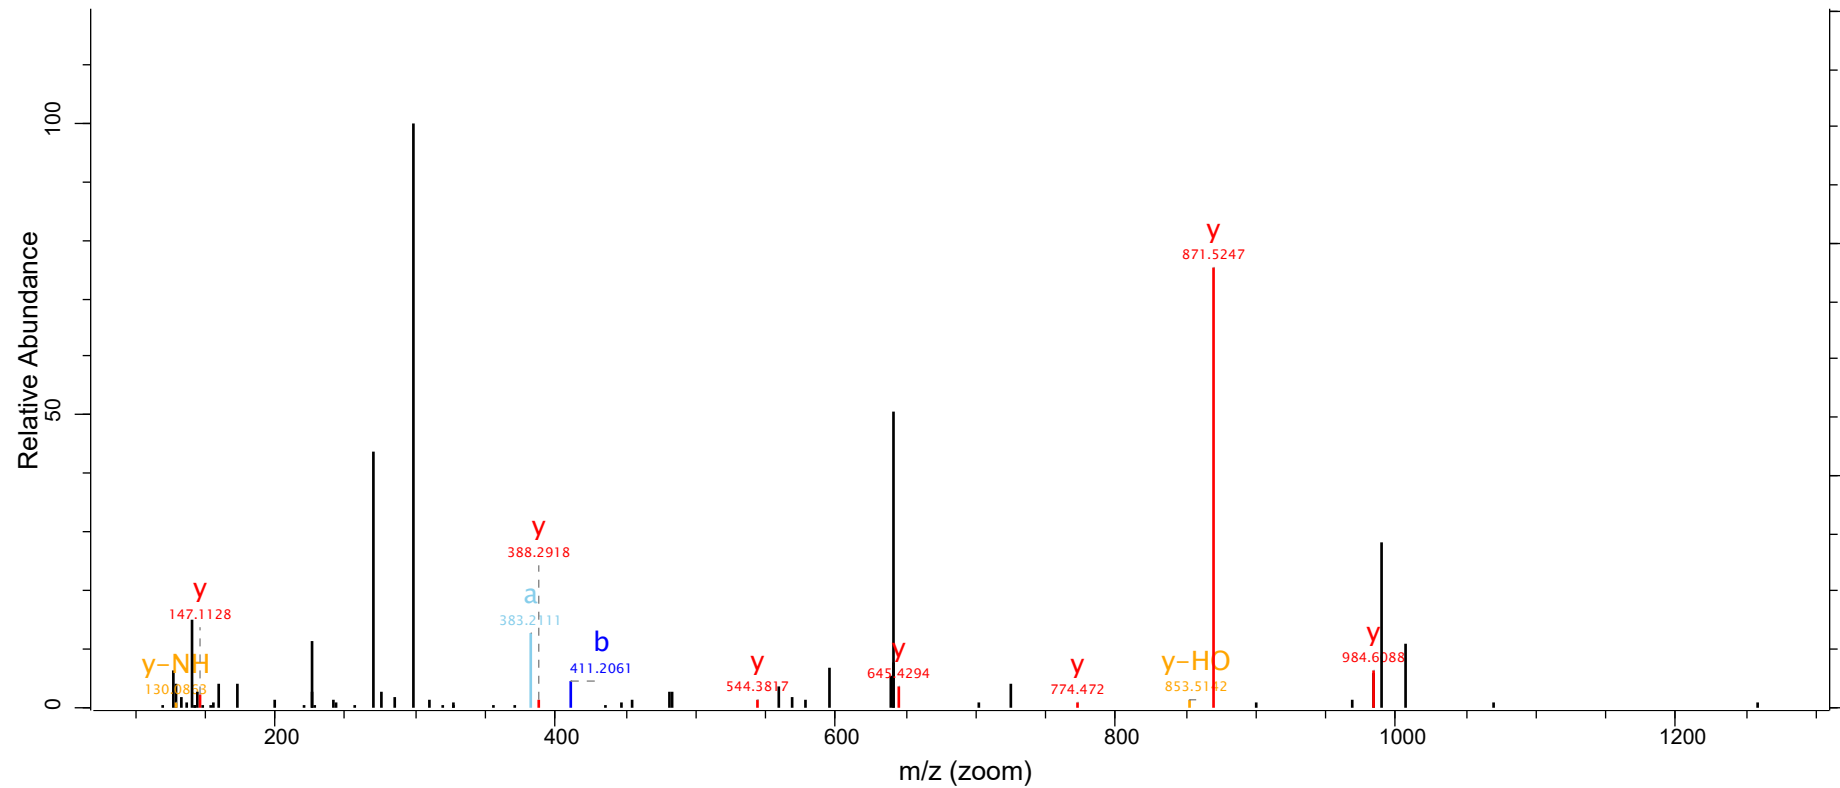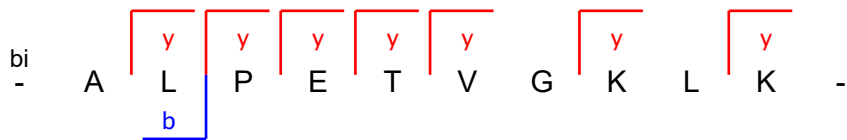

Raw File  
agg\_pep\_sort\_pos\_1

Scan  
17295

Method  
FTMS; HCD

Score  
69.42

m/z  
641.37

Gene names  
TPST1

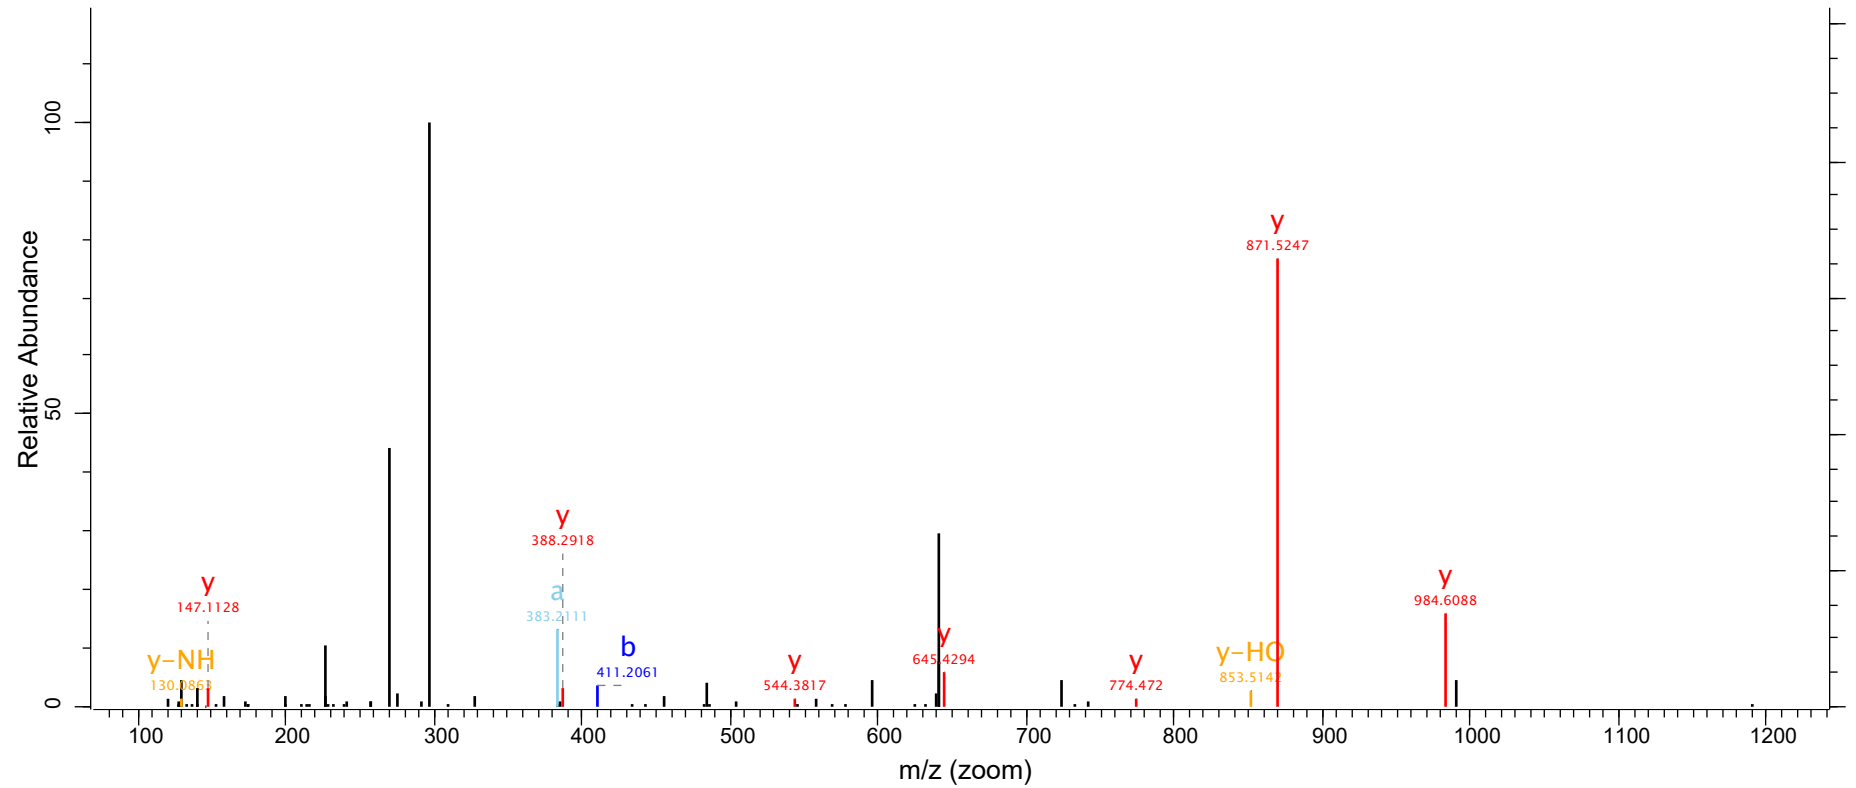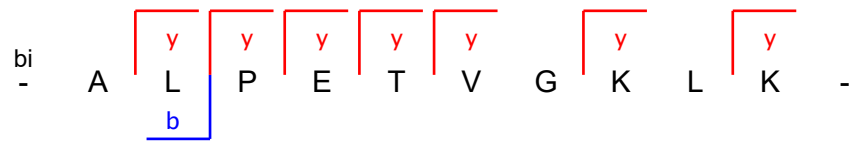



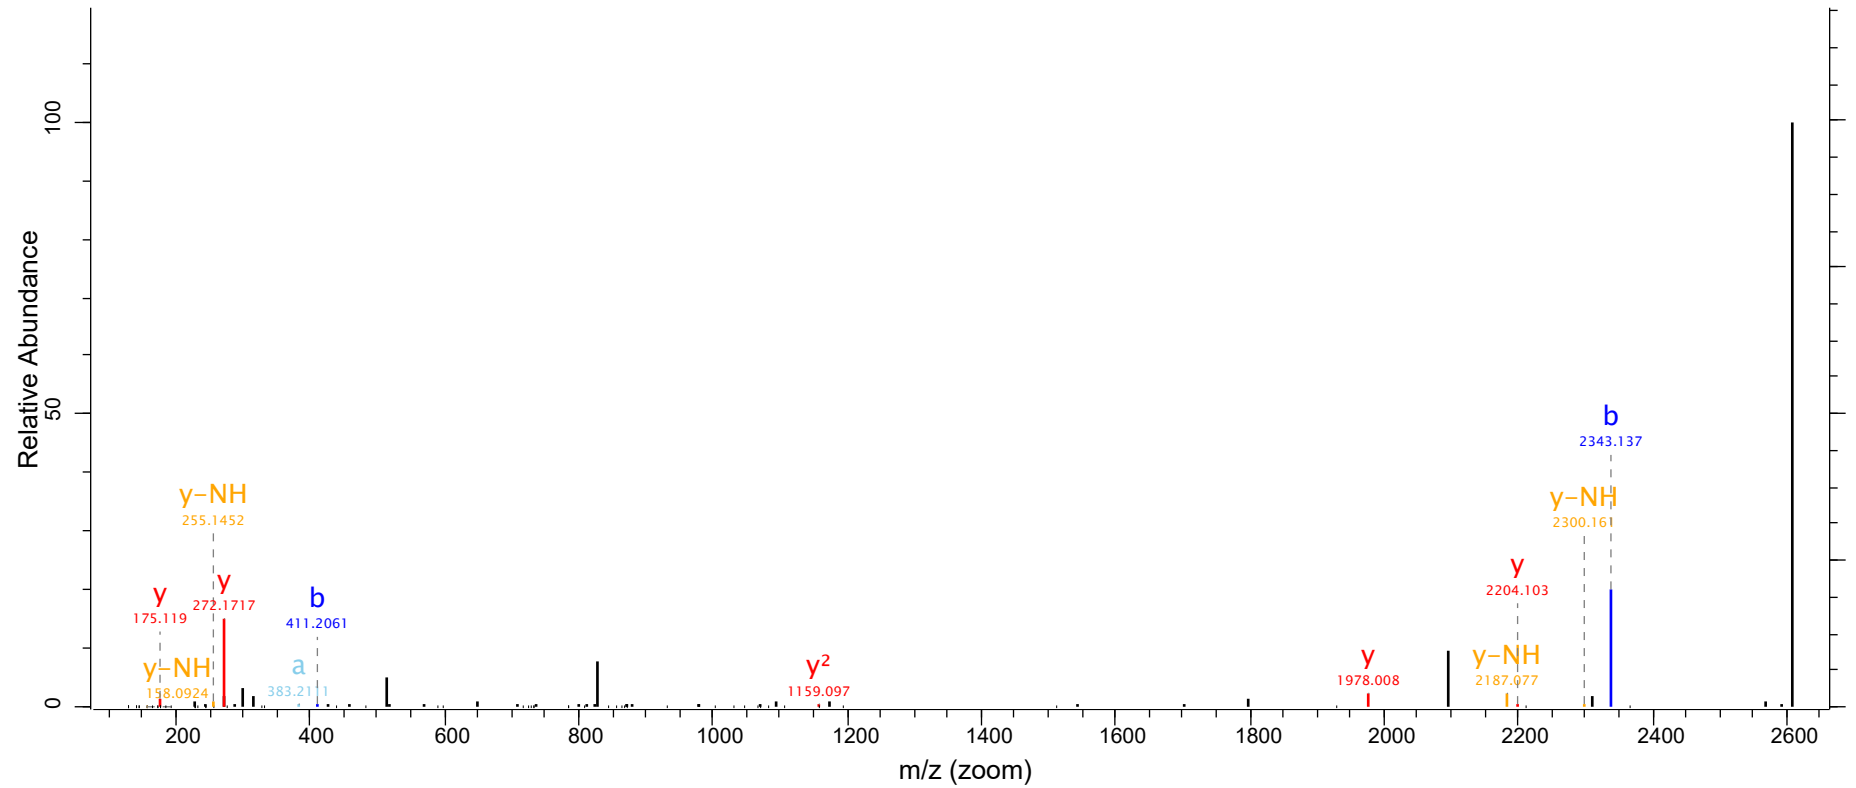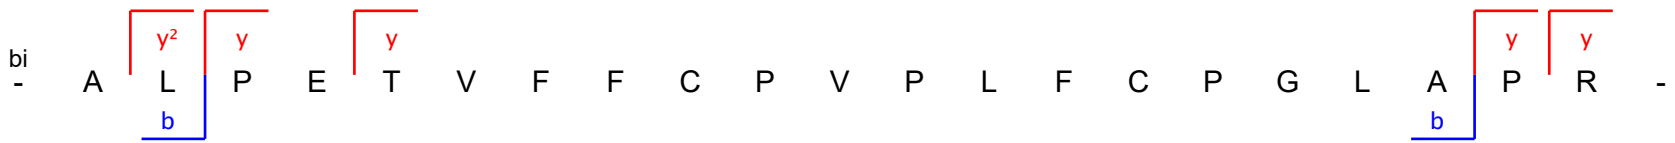

Raw File  
agg\_pep\_sort\_pos\_1

Scan  
16987

Method  
FTMS; HCD

Score  
57.35

m/z  
967.02

Gene names  
WASF2

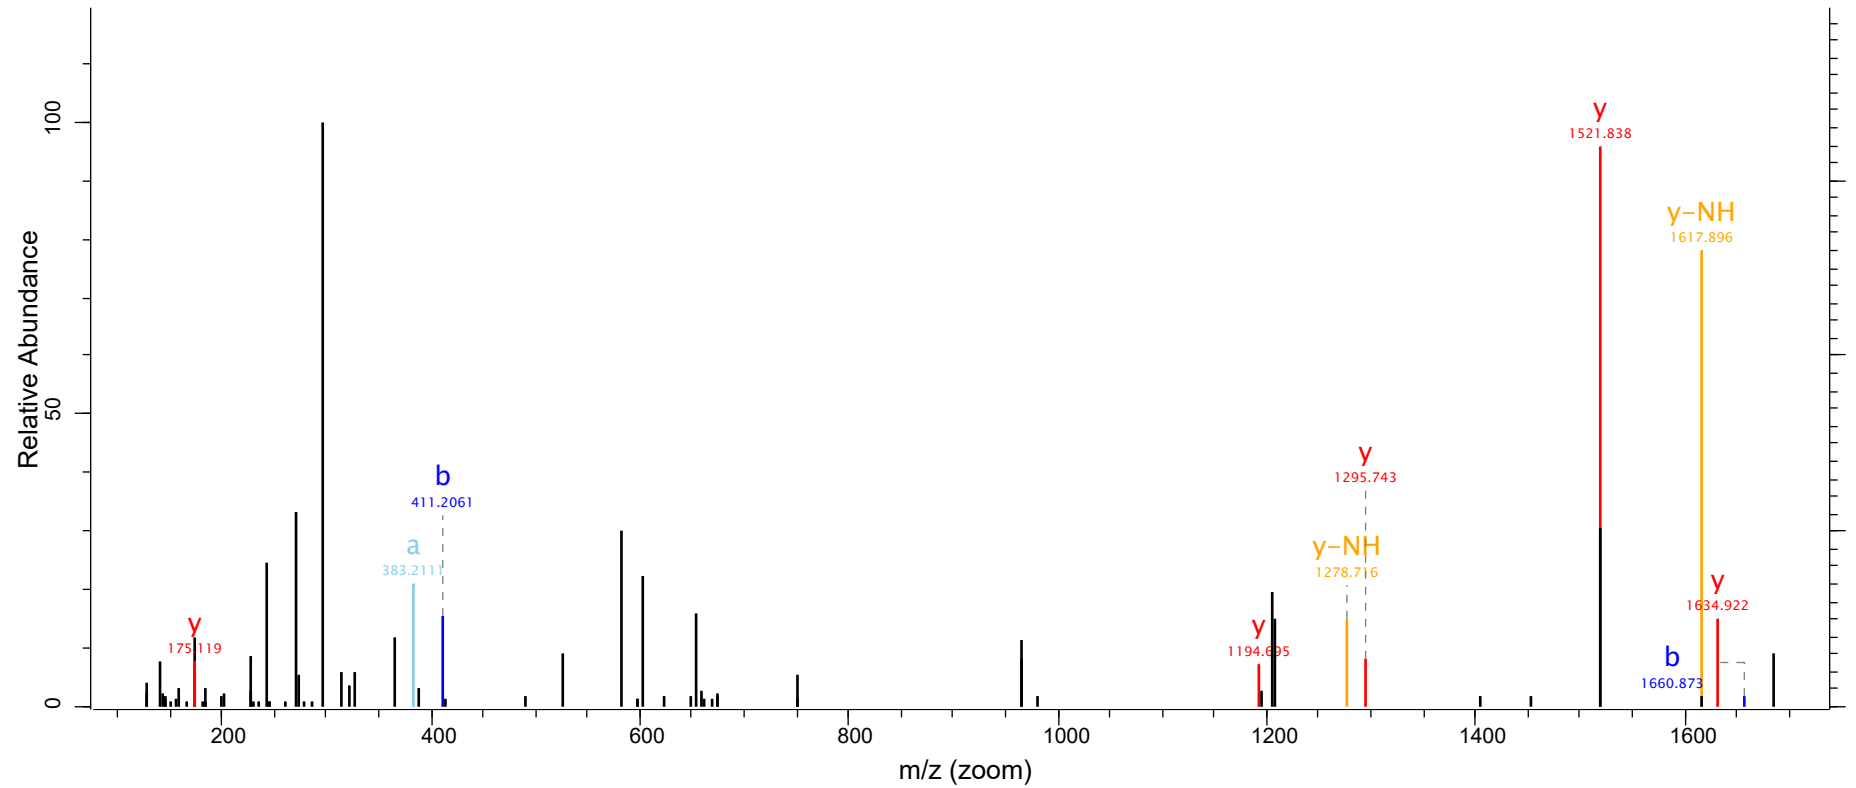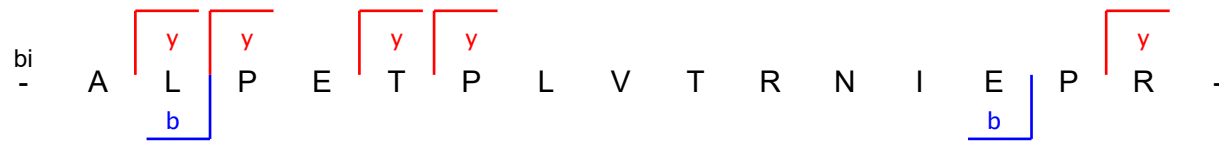

Raw File  
agg\_pep\_sort\_pos\_1

Scan  
12281

Method  
FTMS; HCD

Score  
57.8

m/z  
524.6

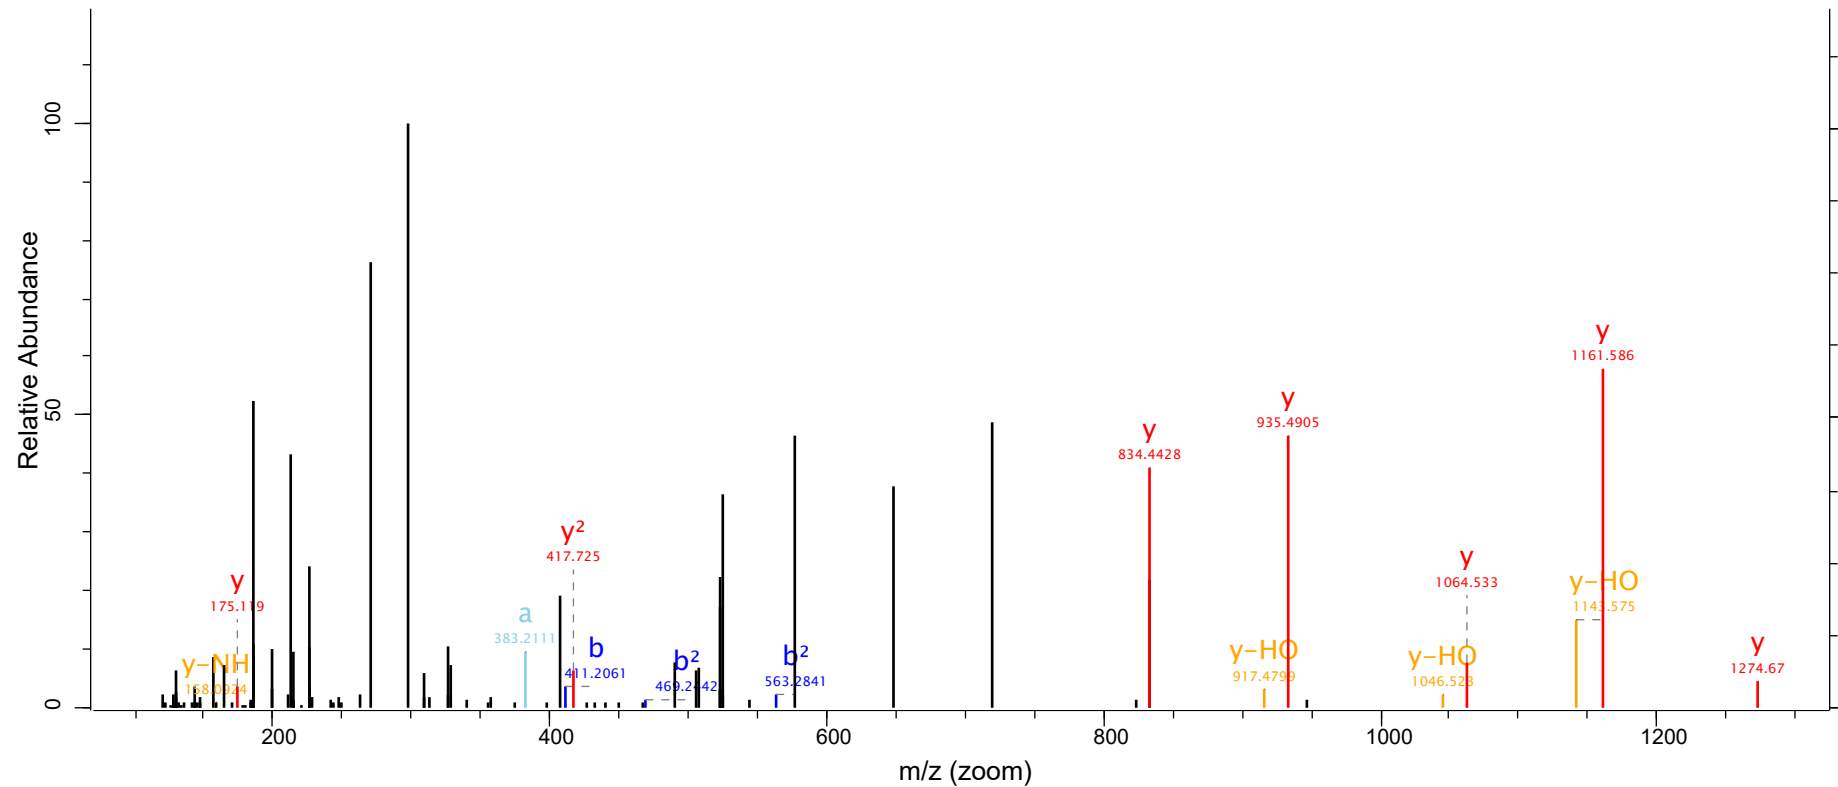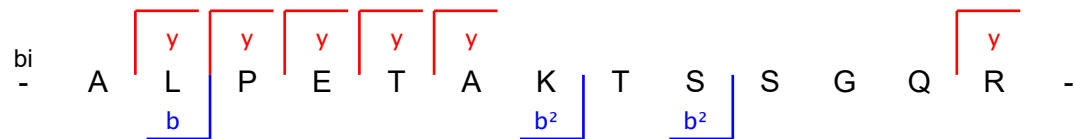

**Figure S3.** MS/MS spectra of Biotin-ALPET modified peptides (confident assignments) detected using chemoproteomic approach presented in Fig. 3. MS/MS spectra for a given peptide were selected based on the highest Andromeda score. All spectra contain a singly charged diagnostic ion of  $m/z = 227.0849$  that represents the biotin-originated b-type ion. Spectra have been arranged alphabetically according to the gene names returned from the database search.

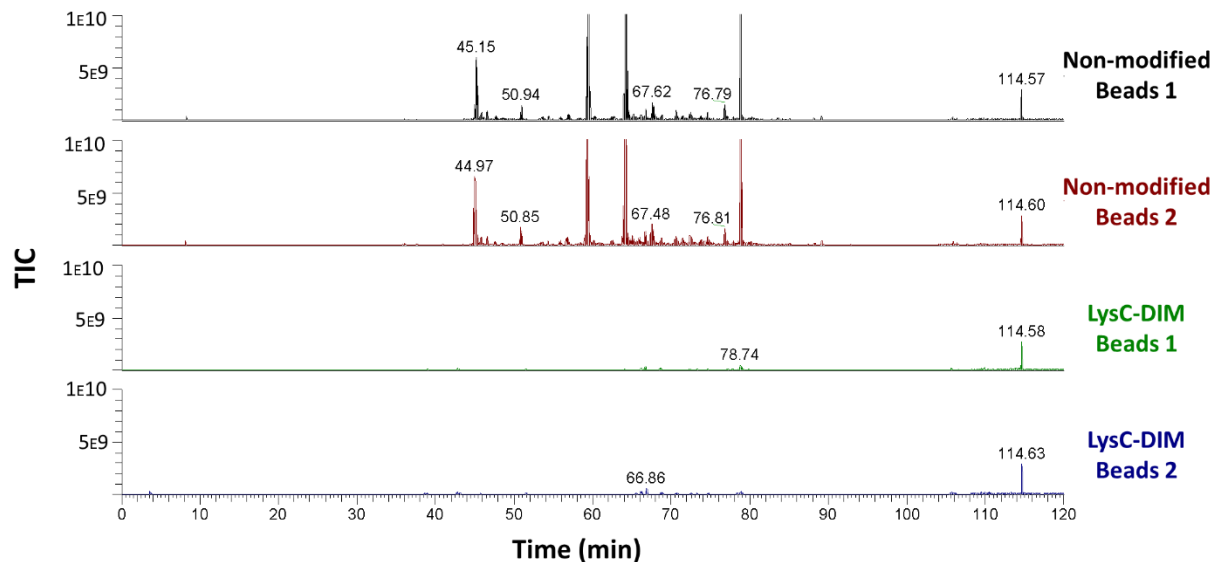

**Figure S4. Capping NeutrAvidin lysines by dimethylation followed by a two-step on-bead LysC/off-bead trypsin digestion significantly reduces NeutrAvidin-derived high intensity peaks.** Samples containing 200  $\mu\text{g}$  of Biotin-ALPET labeled proteins, originated from MDA-MB-231 cells, were incubated in duplicate with 200  $\mu\text{L}$  of dimethylated NeutrAvidin agarose beads or with 200  $\mu\text{L}$  of non-derivatized NeutrAvidin agarose beads for 2 h at RT. Samples incubated with dimethylated beads were subjected to 1 h LysC digestion followed by digestion off-bead with trypsin overnight. Samples incubated with non-derivatized beads were subjected to an overnight on-bead digestion with trypsin. The plots show total ion current (TIC) chromatograms recorded for each of the four samples.

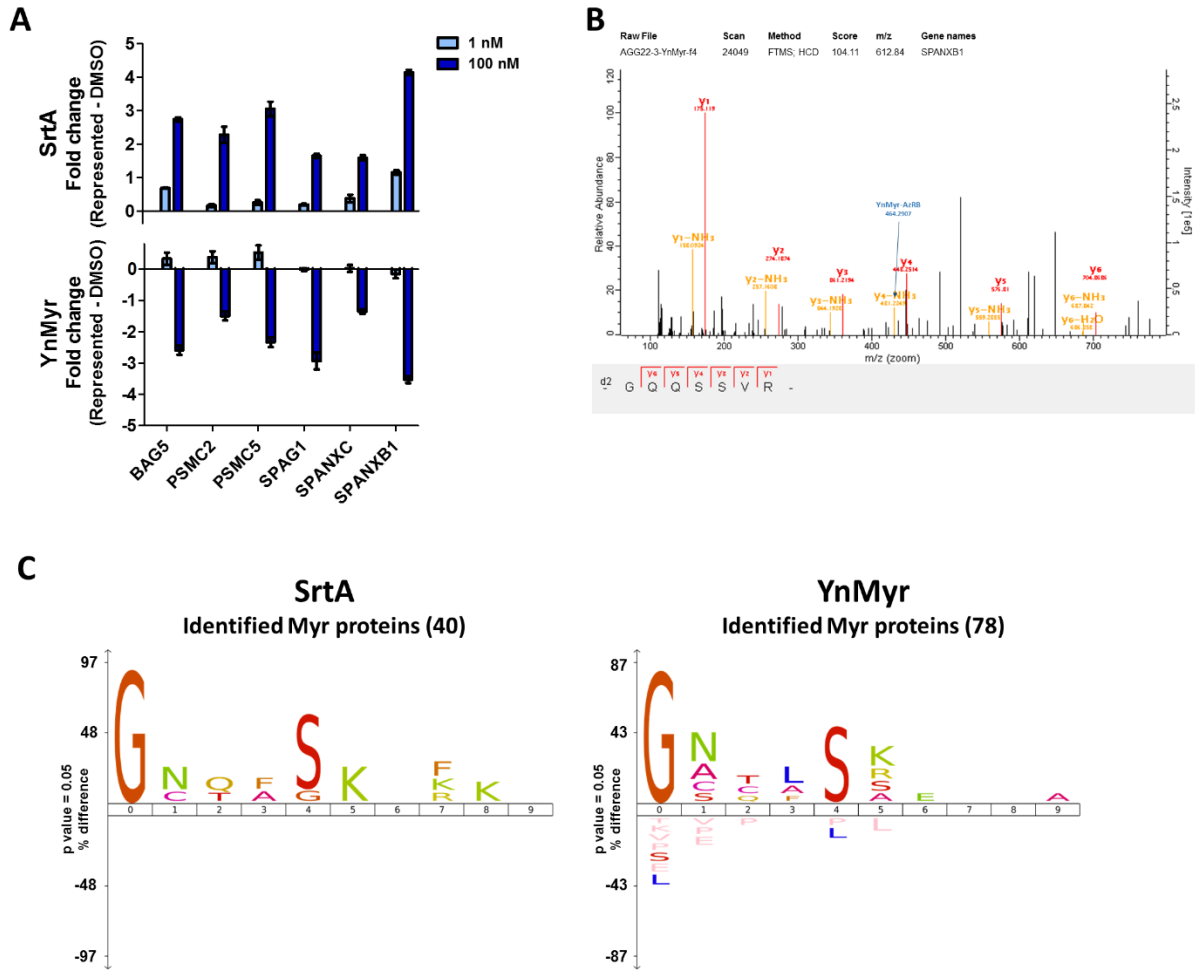

**Figure S5. Comparison of SrtA-labeling with YnMyr metabolic tagging to assess NMT activity by protein-enrichment proteomics analysis. (A)** Enrichment-derived intensities of significant proteins not previously known to be myristoylated. **(B)** Annotated MS/MS spectrum of SPANXB1 N-terminal peptide showing modification with YnMyr-AzRB. **(C)** Sequence logos of all known myristoylated proteins identified in SrtA and YnMyr protein-based enrichment experiments. Logos were generated with iceLogo (23), using the pre-compiled Swissprot human proteome (accessed on 17/09/2018) as the reference set.

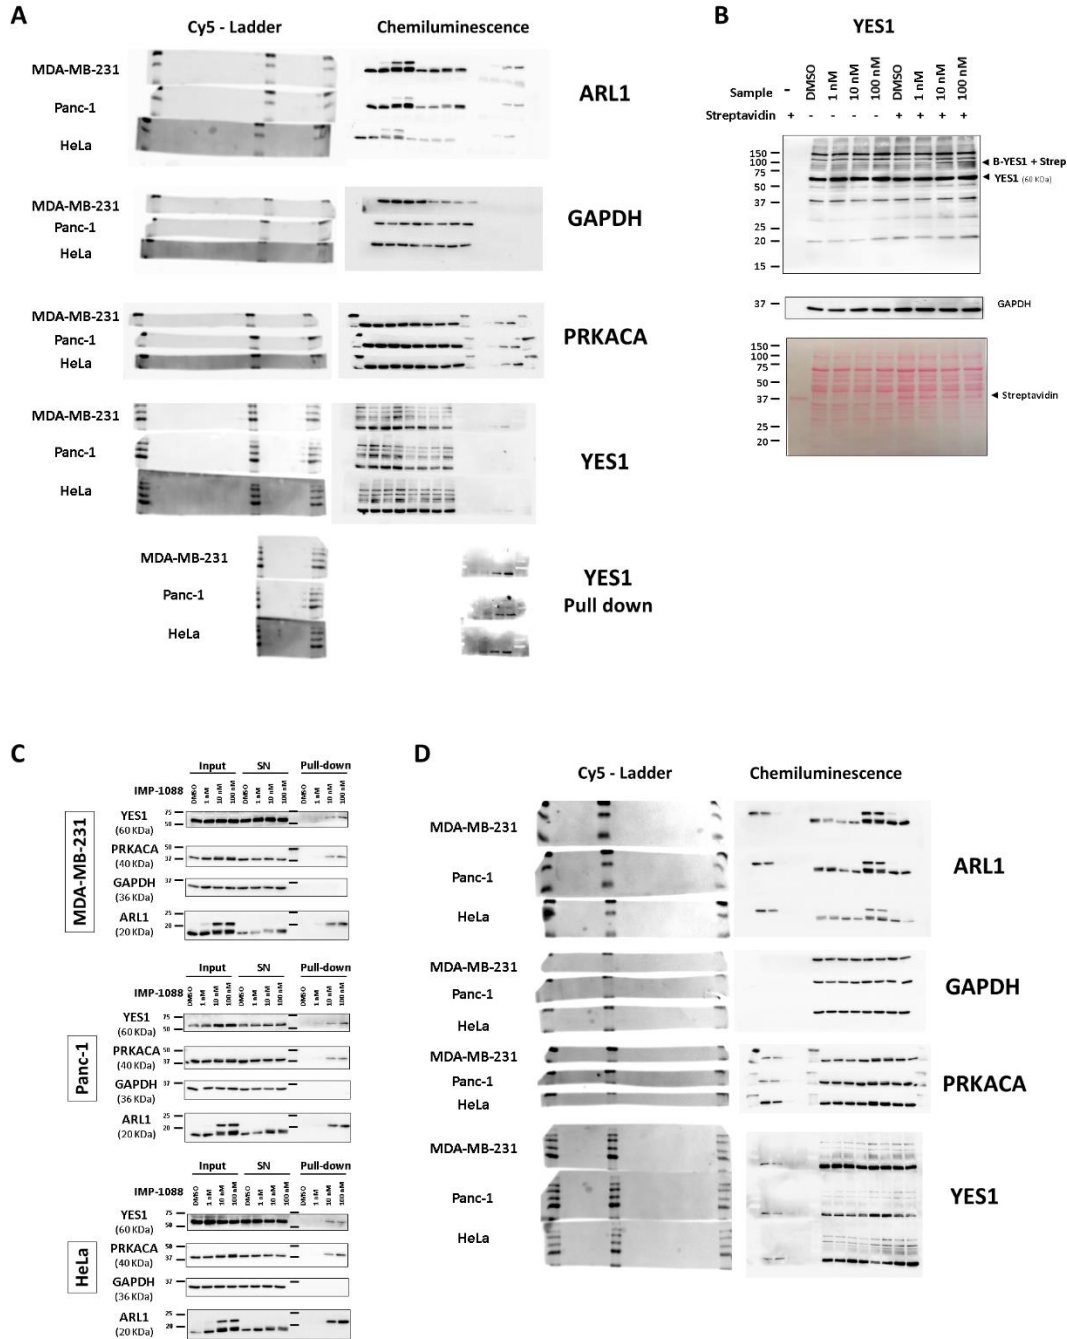

**Figure S6.** (A) Full membrane view of the western blots shown in Fig. 5A. (B) Streptavidin shift assay followed by western blot analysis against YES1. (C) A second biological replicate of the pull-down western blot analysis of selected myristoylated proteins showing NMTi dose-dependent increase in enrichment for all proteins but loading control (GAPDH). (D) Full membrane view of western blots shown in (C).
